# Supplementary material
Source: MDPI journal article supplement (https://www.mdpi.com/search?q=metabolites-12-00249)
Supplement: s001 [file metabolites-12-00249-s001.zip]

## Sheet: Table S1
Table S1: Counts of self-reported drugs (based on manually annotated free-text questionaire data from 6,000 QBB participants).
Unified molecule name	sum		Drug class	sum		Indication	sum		Level 1	Level 2	Code	ATC	sum
vitamin d	1029		vitamins	1547		nutrition supplement	1612		A	A	A	A - ALIMENTARY TRACT AND METABOLISM	1422
metformin	533		mitochondrial complex I inhibitor	533		diabetes	820		A	A01	A01A	A01A - STOMATOLOGICAL PREPARATIONS	321
levothyroxine	492		thyroid hormone receptor agonist	494		dyslipidemia	686		A	A01	A01	A01 - STOMATOLOGICAL PREPARATIONS	321
multivitamin	462		HMG-CoA reductase inhibitor	402		hypertension	633		A	A01	A01AD	A01AD - Other agents for local oral treatment	310
acetylsalicylic acid	309		mineral	384		hypothyroidism	513		A	A01	A01AC	A01AC - Corticosteroids for local oral treatment	8
unspecified dyslipidemia	278		non-selective cyclooxygenase (cox) inhibitor	309		antiinflammatory	344		A	A01	A01AB	A01AB - Antiinfectives and antiseptics for local oral treatment	3
unspecified hypertension	259		unspecified dyslipidemia	278		gastroesophageal reflux	264		A	A02	A02	A02 - DRUGS FOR ACID RELATED DISORDERS	239
atorvastatin	234		unspecified hypertension	257		antianemic	228		A	A02	A02B	A02B - DRUGS FOR PEPTIC ULCER AND GASTRO-OESOPHAGEAL REFLUX DISEASE (GORD)	238
insulin aspart	224		insulin	224		contraceptive	117		A	A02	A02BC	A02BC - Proton pump inhibitors	212
iron	223		proton pump inhibitor	212		antiasthmatic	90		A	A02	A02BD	A02BD - Combinations for eradication of Helicobacter pylori	146
calcium	169		ATP sensitive potassium channel inhibitor	182		hair loss	84		A	A02	A02BA	A02BA - H2-receptor antagonists	25
Omega-3 fatty acids	165		fatty acids	170		not annotated	72		A	A02	A02AD	A02AD - Combinations and complexes of aluminium, calcium and magnesium compounds	2
vitamin b	155		unspecified diabetes	153		allergy	71		A	A02	A02AB	A02AB - Aluminium compounds	2
unspecified diabetes	153		angiotensin receptor blockers	136		antidepressant	68		A	A02	A02A	A02A - ANTACIDS	2
rosuvastatin	141		antihistamine	123		analgesic	68		A	A02	A02BX	A02BX - Other drugs for peptic ulcer and gastro-oesophageal reflux disease (GORD)	1
gliclazide	121		beta blockers	114		rheumatoid arthritis	48		A	A03	A03	A03 - DRUGS FOR FUNCTIONAL GASTROINTESTINAL DISORDERS	19
valsartan	87		ACE inhibitor	94		prostatic hyperplasia	38		A	A03	A03A	A03A - DRUGS FOR FUNCTIONAL GASTROINTESTINAL DISORDERS	12
unspecified hair loss	84		dipeptidyl peptidase 4 inhibitor	93		myocardial infarction	38		A	A03	A03AA	A03AA - Synthetic anticholinergics, esters with tertiary amino group	9
sitagliptin	78		calcium channel blockers	85		unspecified heart problems	30		A	A03	A03FA	A03FA - Propulsives	6
amlodipine	74		not annotated	72		allergic rhinitis	30		A	A03	A03F	A03F - PROPULSIVES	6
esomeprazole	73		beta-2 adrenergic receptor agonist	58		edema	28		A	A03	A03AX	A03AX - Other drugs for functional gastrointestinal disorders	3
rabeprazole	72		unspecified contraceptive	49		antiepileptic	27		A	A03	A03C	A03C - ANTISPASMODICS IN COMBINATION WITH PSYCHOLEPTICS	2
not annotated	72		nonsteroidal antiinflammatory agents	48		deep vein thrombosis	26		A	A03	A03CB	A03CB - Belladonna and derivatives in combination with psycholeptics	1
ascorbic acid	72		estrogen receptor agonist	44		analgesicand antiinflammatory	23		A	A03	A03CA	A03CA - Synthetic anticholinergic agents in combination with psycholeptics	1
folic acid	60		platelet aggregation inhibitor	39		obesity	21		A	A03	A03BA	A03BA - Belladonna alkaloids, tertiary amines	1
salbutamol	56		vasodilator	38		acne	21		A	A03	A03B	A03B - BELLADONNA AND DERIVATIVES, PLAIN	1
glimepiride	54		selective serotonin reuptake inhibitor	38		gout	18		A	A04	A04AD	A04AD - Other antiemetics	1
unspecified contraceptive	49		glucocorticoid receptor agonist	38		angina pectoris	18		A	A04	A04A	A04A - ANTIEMETICS AND ANTINAUSEANTS	1
bisoprolol	45		unspecified analgesic	35		antibiotic	17		A	A04	A04	A04 - ANTIEMETICS AND ANTINAUSEANTS	1
atenolol	44		unspecified	34		unspecified ocular condition	16		A	A05	A05AA	A05AA - Bile acids and derivatives	2
losartan	42		cox-2 inhibitor	34		constipation	14		A	A05	A05A	A05A - BILE THERAPY	2
ethinylestradiol	42		amino acids	31		antipsychotic	14		A	A05	A05	A05 - BILE AND LIVER THERAPY	2
clopidogrel	38		unspecified supplement	28		nasal congestion	13		A	A06	A06A	A06A - DRUGS FOR CONSTIPATION	8
unspecified vitamin	36		sodium-potassium-chloride cotransporters inhibitor	28		irritable bowel syndrome	13		A	A06	A06	A06 - DRUGS FOR CONSTIPATION	8
unspecified analgesic	35		alkalizer	28		inflammatory bowel disease	13		A	A06	A06AB	A06AB - Contact laxatives	6
omeprazole	35		selective brain cyclooxygenase (cox) inhibitor	26		unspecified	12		A	A06	A06AG	A06AG - Enemas	3
unspecified supplement	33		unspecified heart	25		seizures	12		A	A06	A06AX	A06AX - Other drugs for constipation	1
celecoxib	33		voltage dependent calcium channel inhibitor	21		glaucoma	11		A	A06	A06AD	A06AD - Osmotically acting laxatives	1
indapamide	32		retinoic acid receptor beta inhibitor	20		unspecified stomach	10		A	A07	A07	A07 - ANTIDIARRHEALS, INTESTINAL ANTIINFLAMMATORY/ANTIINFECTIVE AGENTS	30
pantoprazole	31		multiple targets	19		diabetic peripheral neuropathy pain	9		A	A07	A07E	A07E - INTESTINAL ANTIINFLAMMATORY AGENTS	29
unspecified allergy	30		peroxisome proliferator-activated receptor gamma agonist	18		vertigo	8		A	A07	A07EA	A07EA - Corticosteroids acting locally	16
perindopril	30		unspecified thyroid	17		urinary tract infection	8		A	A07	A07EC	A07EC - Aminosalicylic acid and similar agents	13
unspecified gastroesophageal reflux	28		unspecified antidepressant	17		adrenal insufficiency	7		A	A07	A07BA	A07BA - Charcoal preparations	1
acetaminophen	28		serotonin reuptake inhibitor	17		psoriasis	6		A	A07	A07B	A07B - INTESTINAL ADSORBENTS	1
vitamin e	27		leukotriene receptor antagonist	16		infertility	6		A	A08	A08A	A08A - ANTIOBESITY PREPARATIONS, EXCL. DIET PRODUCTS	15
lisinopril	27		unspecified prostate	15		immunosuppressant	6		A	A08	A08	A08 - ANTIOBESITY PREPARATIONS, EXCL. DIET PRODUCTS	15
unspecified heart	25		progesterone receptor agonist	15		erectile dysfunction	6		A	A08	A08AB	A08AB - Peripherally acting antiobesity products	14
ranitidine	25		acylated glucagon like peptide1 agonist	15		dryness of the eye	6		A	A08	A08AA	A08AA - Centrally acting antiobesity products	2
protein supplement	23		xanthine oxidase inhibitor	14		breast cancer	6		A	A10	A10	A10 - DRUGS USED IN DIABETES	795
irbesartan	22		SGLT-2 inhibitor	14		anxiety	6		A	A10	A10B	A10B - BLOOD GLUCOSE LOWERING DRUGS, EXCL. INSULINS	681
fexofenadine	22		pancreatic lipase inhibitor	14		osteoporosis	5		A	A10	A10BD	A10BD - Combinations of oral blood glucose lowering drugs	576
escitalopram	22		laxative	14		migraine	5		A	A10	A10BA	A10BA - Biguanides	533
hydrochlorothiazide	21		epoxide reductase complex inhibitor	14		excessive gas	5		A	A10	A10BH	A10BH - Dipeptidyl peptidase 4 (DPP-4) inhibitors	233
isotretinoin	20		anticholinergic	14		dyspepsia	5		A	A10	A10A	A10A - INSULINS AND ANALOGUES	230
enalapril	20		alpha adrenergic receptor antagonist	14		allergy or anxiety	5		A	A10	A10AD	A10AD - Insulins and analogues for injection, intermediate- or long-acting combined with fast-acting	224
zinc	18		unspecified antiasthmatic	13		unspecified kidney	4		A	A10	A10AB	A10AB - Insulins and analogues for injection, fast-acting	224
pioglitazone	18		glucocorticoid receptor agonistand beta-adrenergic receptor agonist	13		parkinsonism	4		A	A10	A10BB	A10BB - Sulfonylureas	179
diclofenac	18		herbal products	12		osteoarthritis	4		A	A10	A10BJ	A10BJ - Glucagon-like peptide-1 (GLP-1) analogues	20
unspecified thyroid	17		unspecified nasal spray	11		muscle spasm	4		A	A10	A10BG	A10BG - Thiazolidinediones	18
unspecified antidepressant	17		amino sugar	11		multiple sclerosis	4		A	A10	A10AE	A10AE - Insulins and analogues for injection, long-acting	15
unspecified ocular condition	16		unspecified stomach	10		arrhythmia	4		A	A10	A10BK	A10BK - Sodium-glucose co-transporter 2 (SGLT2) inhibitors	14
montelukast	16		synaptic vesicle protein SV2A agnonist	10		vitiligo	3		A	A10	A10BX	A10BX - Other blood glucose lowering drugs, excl. insulins	3
vildagliptin	15		immunosuppressant	10		ocular allergic rhinitis	3		A	A11	A11	A11 - VITAMINS	430
unspecified prostate	15		structural protein	7		menopausal therapy	3		A	A11	A11AA	A11AA - Multivitamins with minerals	361
liraglutide	15		sodium channel blocker	7		hypokalemia	3		A	A11	A11A	A11A - MULTIVITAMINS, COMBINATIONS	361
warfarin	14		peroxisome proliferator-activated receptor alpha agonist	7		hyperprolactinemia	3		A	A11	A11GB	A11GB - Ascorbic acid (vitamin C), combinations	227
tamsulosin	14		cholesterol absorption inhibitor	7		heartburn	3		A	A11	A11G	A11G - ASCORBIC ACID (VITAMIN C), INCL. COMBINATIONS	227
simvastatin	14		5-alpha-reductase inhibitor	7		diuretic	3		A	A11	A11GA	A11GA - Ascorbic acid (vitamin C), plain	72
salmeterol	14		unspecified colon	6		antiviral	3		A	A11	A11C	A11C - VITAMIN A AND D, INCL. COMBINATIONS OF THE TWO	11
orlistat	14		unspecified anticoagulant	6		unspecified urination	2		A	A11	A11HA	A11HA - Other plain vitamin preparations	9
desloratadine	14		unspecified antibiotic	6		unspecified ear	2		A	A11	A11H	A11H - OTHER PLAIN VITAMIN PREPARATIONS	9
cetirizine	14		cyclic guanosine monophosphate phosphodiesterase inhibitor	6		toxic liver damage	2		A	A11	A11CA	A11CA - Vitamin A, plain	7
allopurinol	14		beta-1 & beta-2 adrenergic receptor antagonist	6		primary biliary cirrhosis	2		A	A11	A11CC	A11CC - Vitamin D and analogues	4
unspecified antiasthmatic	13		alpha-1 adrenergic receptor antagonist	6		ocular irritations	2		A	A12	A12	A12 - MINERAL SUPPLEMENTS	6
dapagliflozin	13		vasodilators	5		nicotine addiction	2		A	A12	A12BA	A12BA - Potassium	4
topiramate	12		unspecified rheumatoid arthritis	5		myasthenia gravis	2		A	A12	A12B	A12B - POTASSIUM	4
metoprolol	12		serotonin receptor agonist	5		metabolic acidosis	2		A	A12	A12CA	A12CA - Sodium	2
gestodene	12		nucleotide synthesis inhibitor	5		insomnia	2		A	A12	A12C	A12C - OTHER MINERAL SUPPLEMENTS	2
unspecified nasal spray	11		glucocorticoid receptor antagonist	5		hypotension	2		A	A14	A14AA	A14AA - Androstan derivatives	1
glucosamine	11		glucagon like peptide1 agonist	5		hypogonadism	2		A	A14	A14A	A14A - ANABOLIC STEROIDS	1
unspecified stomach	10		dopamine D2 receptor antagonist	5		hyperthyroidism	2		A	A14	A14	A14 - ANABOLIC AGENTS FOR SYSTEMIC USE	1
mometasone	10		antifoaming agent	5		eczema	2		A	A16	A16A	A16A - OTHER ALIMENTARY TRACT AND METABOLISM PRODUCTS	8
mesalazine	10		unspecified osteoarthritis	4		dwarfism	2		A	A16	A16	A16 - OTHER ALIMENTARY TRACT AND METABOLISM PRODUCTS	8
levetiracetam	10		unspecified obesity	4		cough	2		A	A16	A16AA	A16AA - Amino acids and derivatives	7
fosinopril	10		unspecified kidney	4		chronic hepatitis B or C	2		A	A16	A16AX	A16AX - Various alimentary tract and metabolism products	1
cyanocobalamin	10		unspecified antipsychotic	4		autoimmune diseases	2		B	B	B	B - BLOOD AND BLOOD FORMING ORGANS	628
pregabalin	9		penicillin-binding protein 1 inhibitor	4		attention deficit disorder	2		B	B01	B01A	B01A - ANTITHROMBOTIC AGENTS	350
pravastatin	9		monoclonal antibody (TNF alfa inhibitor)	4		antispasmodic	2		B	B01	B01	B01 - ANTITHROMBOTIC AGENTS	350
mebeverine	9		inosine monophosphate dehydrogenase inhibitor	4		anthelmintic	2		B	B01	B01AC	B01AC - Platelet aggregation inhibitors excl. heparin	332
dydrogesterone	9		coagulation factor X inhibitor	4		unspecified varicose veins	1		B	B01	B01AA	B01AA - Vitamin K antagonists	14
biotin	9		carnitine	4		unspecified stress	1		B	B01	B01AF	B01AF - Direct factor Xa inhibitors	4
azathioprine	9		unspecified vitiligo	3		thrombocytopenia	1		B	B01	B01AB	B01AB - Heparin group	1
meloxicam	8		unspecified hormonal therapy	3		spinal cord injury	1		B	B02	B02B	B02B - VITAMIN K AND OTHER HEMOSTATICS	2
betahistine	8		unspecified gout	3		skin protectant	1		B	B02	B02	B02 - ANTIHEMORRHAGICS	2
unspecified amino acid	7		unspecified glaucoma	3		prostate cancer	1		B	B02	B02BD	B02BD - Blood coagulation factors	1
prednisolone	7		unspecified diuretic	3		promote weight gain	1		B	B02	B02BC	B02BC - Local hemostatics	1
gabapentin	7		unspecified anxiety	3		performance enhancing	1		B	B03	B03	B03 - ANTIANEMIC PREPARATIONS	285
furosemide	7		unspecified antiinflammatory	3		overactive bladder	1		B	B03	B03AE	B03AE - Iron in other combinations	284
ezetimibe	7		tetracycline	3		nausea	1		B	B03	B03A	B03A - IRON PREPARATIONS	284
collagen	7		prolactin inhibitor	3		liver dysfunction	1		B	B03	B03B	B03B - VITAMIN B12 AND FOLIC ACID	69
carvedilol	7		mineralocorticoid receptor antagonist	3		leukemia	1		B	B03	B03BB	B03BB - Folic acid and derivatives	60
vitamin a	6		estrogen receptor modulator	3		joint pain	1		B	B03	B03BA	B03BA - Vitamin B12 (cyanocobalamin and analogues)	10
unspecified colon	6		calcium channel blocker	3		intracranial pressure	1		B	B03	B03XA	B03XA - Other antianemic preparations	1
unspecified anticoagulant	6		androgen receptor agonist	3		immunodeficiency	1		B	B03	B03X	B03X - OTHER ANTIANEMIC PREPARATIONS	1
unspecified antibiotic	6		alpha-2-adrenergic receptor agonist	3		herpes	1		B	B05	B05X	B05X - I.V. SOLUTION ADDITIVES	11
simethicone	6		alpha adrenergic receptor agonist	3		hereditary angioedema	1		B	B05	B05	B05 - BLOOD SUBSTITUTES AND PERFUSION SOLUTIONS	11
nifedipine	6		alkalyzer	3		hepatitis C	1		B	B05	B05XA	B05XA - Electrolyte solutions	7
levocetirizine	6		voltage gated sodium channels blocker	2		hemophilia	1		B	B05	B05XB	B05XB - Amino acids	5
formoterol	6		unspecified urination control	2		heamophilia	1		B	B05	B05CB	B05CB - Salt solutions	4
fluoxetine	6		unspecified urinary tract infection	2		haemorrhoid	1		B	B05	B05C	B05C - IRRIGATING SOLUTIONS	4
domperidone	6		unspecified probiotic	2		digestion	1		C	C	C	C - CARDIOVASCULAR SYSTEM	815
cortisone	6		unspecified multiple sclerosis	2		dermatitis	1		C	C01	C01	C01 - CARDIAC THERAPY	19
zolmitriptan	5		unspecified infertility	2		coronary artery disease	1		C	C01	C01EB	C01EB - Other cardiac preparations	7
venlafaxine	5		unspecified hair loss	2		autoimmune hepatitis	1		C	C01	C01E	C01E - OTHER CARDIAC PREPARATIONS	7
valproic acid	5		unspecified gastroesophageal reflux	2		amoebae infection	1		C	C01	C01DA	C01DA - Organic nitrates	7
unspecified rheumatoid arthritis	5		unspecified eczema	2		Alzheimer	1		C	C01	C01D	C01D - VASODILATORS USED IN CARDIAC DISEASES	7
timolol	5		unspecified ear	2		alcohol & opioid dependence	1		C	C01	C01CA	C01CA - Adrenergic and dopaminergic agents	3
propranolol	5		unspecified dryness of the eye	2					C	C01	C01C	C01C - CARDIAC STIMULANTS EXCL. CARDIAC GLYCOSIDES	3
paroxetine	5		unspecified cough	2					C	C01	C01B	C01B - ANTIARRHYTHMICS, CLASS I AND III	2
methotrexate	5		unspecified breast cancer	2					C	C01	C01BD	C01BD - Antiarrhythmics, class III	1
magnesium	5		unspecified antiepileptic	2					C	C01	C01BC	C01BC - Antiarrhythmics, class Ic	1
loratadine	5		tubulin inhibitor	2					C	C02	C02	C02 - ANTIHYPERTENSIVES	12
isosorbide dinitrate	5		TNF alfa inhibitor	2					C	C02	C02L	C02L - ANTIHYPERTENSIVES AND DIURETICS IN COMBINATION	6
ibuprofen	5		thyroid peroxidase inhibitor	2					C	C02	C02D	C02D - ARTERIOLAR SMOOTH MUSCLE, AGENTS ACTING ON	5
hydroxyzine	5		sphingosine 1-phosphate receptor modulator	2					C	C02	C02LG	C02LG - Hydrazinophthalazine derivatives and diuretics	3
ginseng	5		purified salt solution	2					C	C02	C02LC	C02LC - Imidazoline receptor agonists in combination with diuretics	3
garlic	5		protein synthesis inhibitor	2					C	C02	C02KX	C02KX - Antihypertensives for pulmonary arterial hypertension	3
fenofibrate	5		phlebotonics	2					C	C02	C02K	C02K - OTHER ANTIHYPERTENSIVES	3
carbamazepine	5		nicotinic acetylcholine receptor agonist	2					C	C02	C02DB	C02DB - Hydrazinophthalazine derivatives	3
budesonide	5		muscarinic acetylcholine receptor antagonist	2					C	C02	C02AC	C02AC - Imidazoline receptor agonists	3
arginine	5		monoclonal antibody against human immunoglobulin E	2					C	C02	C02A	C02A - ANTIADRENERGIC AGENTS, CENTRALLY ACTING	3
alfuzosin	5		growth hormone receptor binder	2					C	C02	C02DC	C02DC - Pyrimidine derivatives	2
verapamil	4		glycosaminoglycan	2					C	C02	C02CA	C02CA - Alpha-adrenoreceptor antagonists	1
unspecified osteoarthritis	4		DNA polymerase inhibitor	2					C	C02	C02C	C02C - ANTIADRENERGIC AGENTS, PERIPHERALLY ACTING	1
unspecified obesity	4		DNA binder	2					C	C03	C03	C03 - DIURETICS	66
unspecified kidney	4		cephalosporin	2					C	C03	C03BA	C03BA - Sulfonamides, plain	35
unspecified antipsychotic	4		carbonic anhydrase blocker	2					C	C03	C03B	C03B - LOW-CEILING DIURETICS, EXCL. THIAZIDES	35
Tetryzoline	4		bile acid receptor agonist	2					C	C03	C03E	C03E - DIURETICS AND POTASSIUM-SPARING AGENTS IN COMBINATION	31
telmisartan	4		aromatase inhibitor	2					C	C03	C03EA	C03EA - Low-ceiling diuretics and potassium-sparing agents	24
sertraline	4		arachidonate 5-lipoxygenase	2					C	C03	C03AX	C03AX - Thiazides, combinations with other drugs	21
ramipril	4		antineoplastic interferons	2					C	C03	C03AB	C03AB - Thiazides and potassium in combination	21
quetiapine	4		alpha-2 adrenergic receptor agonist	2					C	C03	C03AA	C03AA - Thiazides, plain	21
Omega-6 fatty acids	4		aldosterone receptor antagonist	2					C	C03	C03A	C03A - LOW-CEILING DIURETICS, THIAZIDES	21
mycophenolate mofetil	4		acetylcholinesterase inhibitor	2					C	C03	C03EB	C03EB - High-ceiling diuretics and potassium-sparing agents	7
levocarnitine	4		5-hydroxytryptamine receptor 1A antagonist	2					C	C03	C03CB	C03CB - Sulfonamides and potassium in combination	7
lansoprazole	4		3-ketoacyl-CoA thiolase inhibitor	2					C	C03	C03CA	C03CA - Sulfonamides, plain	7
glyburide	4		voltage-gated potassium channel antagonist	1					C	C03	C03C	C03C - HIGH-CEILING DIURETICS	7
fluvastatin	4		voltage sensitive sodium channel blocker	1					C	C03	C03DA	C03DA - Aldosterone antagonists	5
fluticasone	4		unspecified varicose veins	1					C	C03	C03D	C03D - POTASSIUM-SPARING AGENTS	5
finasteride	4		unspecified thrombocytopenia	1					C	C03	C03BB	C03BB - Sulfonamides and potassium in combination	2
exenatide	4		unspecified stress	1					C	C05	C05	C05 - VASOPROTECTIVES	42
desogestrel	4		unspecified osteoporosis	1					C	C05	C05A	C05A - AGENTS FOR TREATMENT OF HEMORRHOIDS AND ANAL FISSURES FOR TOPICAL USE	40
clobetasol propionate	4		unspecified lung	1					C	C05	C05AX	C05AX - Other agents for treatment of hemorrhoids and anal fissures for topical use	18
amoxicillin	4		unspecified leukemia	1					C	C05	C05AA	C05AA - Corticosteroids	12
adalimumab	4		unspecified joint	1					C	C05	C05AE	C05AE - Muscle relaxants	10
unspecified vitiligo	3		unspecified intracranial pressure	1					C	C05	C05CA	C05CA - Bioflavonoids	2
unspecified infertility	3		unspecified insomnia	1					C	C05	C05C	C05C - CAPILLARY STABILIZING AGENTS	2
unspecified hormonal therapy	3		unspecified immunosuppressant	1					C	C07	C07	C07 - BETA BLOCKING AGENTS	430
unspecified gout	3		unspecified hypothyroidism	1					C	C07	C07F	C07F - BETA BLOCKING AGENTS, OTHER COMBINATIONS	428
unspecified glaucoma	3		unspecified heamophilia	1					C	C07	C07FX	C07FX - Beta blocking agents, other combinations	348
unspecified diuretic	3		unspecified haemorrhoid	1					C	C07	C07FB	C07FB - Beta blocking agents and calcium channel blockers	177
unspecified constipation	3		unspecified dizziness	1					C	C07	C07A	C07A - BETA BLOCKING AGENTS	118
unspecified anxiety	3		unspecified dermatitis	1					C	C07	C07B	C07B - BETA BLOCKING AGENTS AND THIAZIDES	111
unspecified antiinflammatory	3		unspecified coronary artery disease	1					C	C07	C07BB	C07BB - Beta blocking agents, selective, and thiazides	101
tadalafil	3		unspecified circulation	1					C	C07	C07AB	C07AB - Beta blocking agents, selective	101
spironolactone	3		unspecified autoimmune hepatitis	1					C	C07	C07C	C07C - BETA BLOCKING AGENTS AND OTHER DIURETICS	57
rivaroxaban	3		unspecified arrhythmia	1					C	C07	C07CB	C07CB - Beta blocking agents, selective, and other diuretics	56
repaglinide	3		unspecified antiviral	1					C	C07	C07D	C07D - BETA BLOCKING AGENTS, THIAZIDES AND OTHER DIURETICS	48
potassium chloride	3		unspecified allergy	1					C	C07	C07DB	C07DB - Beta blocking agents, selective, thiazides and other diuretics	44
piperazine	3		unspecified allergic rhinitis	1					C	C07	C07BA	C07BA - Beta blocking agents, non-selective, and thiazides	11
naproxen	3		unspecified acne	1					C	C07	C07AA	C07AA - Beta blocking agents, non-selective	11
moxonidine	3		tumor necrosis factor inhibitor	1					C	C07	C07AG	C07AG - Alpha and beta blocking agents	8
L-glutamine	3		topoisomerase II inhibitor	1					C	C07	C07DA	C07DA - Beta blocking agents, non-selective, thiazides and other diuretics	5
hydroxychloroquine	3		sympathomimetic alpha adrenergic agonist	1					C	C07	C07CG	C07CG - Alpha and beta blocking agents and other diuretics	1
hydralazine	3		steroid	1					C	C07	C07BG	C07BG - Alpha and beta blocking agents and thiazides	1
green tea leaf	3		sodium reabsorption inhibitor	1					C	C08	C08	C08 - CALCIUM CHANNEL BLOCKERS	91
dutasteride	3		serotonin receptor 5-HT2C activator	1					C	C08	C08CA	C08CA - Dihydropyridine derivatives	84
duloxetine	3		serotonin receptor 5-HT1A agonist	1					C	C08	C08C	C08C - SELECTIVE CALCIUM CHANNEL BLOCKERS WITH MAINLY VASCULAR EFFECTS	84
doxycycline	3		selective opioid receptor ligand with antagonist	1					C	C08	C08GA	C08GA - Calcium channel blockers and diuretics	80
diltiazem	3		quinolones	1					C	C08	C08G	C08G - CALCIUM CHANNEL BLOCKERS AND DIURETICS	80
clomifene	3		pyrimidine synthesis inhibitor	1					C	C08	C08D	C08D - SELECTIVE CALCIUM CHANNEL BLOCKERS WITH DIRECT CARDIAC EFFECTS	7
castor oil	3		prostaglandin F2-alpha receptor agonist	1					C	C08	C08DA	C08DA - Phenylalkylamine derivatives	4
candesartan	3		probiotics	1					C	C08	C08DB	C08DB - Benzothiazepine derivatives	3
cabergoline	3		polysaccharide	1					C	C09	C09	C09 - AGENTS ACTING ON THE RENIN-ANGIOTENSIN SYSTEM	363
bisacodyl	3		polymer	1					C	C09	C09B	C09B - ACE INHIBITORS, COMBINATIONS	238
betamethasone	3		peptidyl-prolyl cis-trans isomerase inhibitor	1					C	C09	C09D	C09D - ANGIOTENSIN II RECEPTOR BLOCKERS (ARBs), COMBINATIONS	224
BCAA	3		nonsteroidal aromatase inhibitor	1					C	C09	C09DB	C09DB - Angiotensin II receptor blockers (ARBs) and calcium channel blockers	210
amitriptyline	3		nitrofuran antibiotic	1					C	C09	C09BX	C09BX - ACE inhibitors, other combinations	186
alfacalcidol	3		muscarinic acetylcholine receptor agonist	1					C	C09	C09DX	C09DX - Angiotensin II receptor blockers (ARBs), other combinations	169
varenicline	2		mTOR inhibitor	1					C	C09	C09BB	C09BB - ACE inhibitors and calcium channel blockers	158
ursodeoxycholic acid	2		mineralocorticoid receptor agonist	1					C	C09	C09DA	C09DA - Angiotensin II receptor blockers (ARBs) and diuretics	157
unspecified urination control	2		melatonin receptor agonist	1					C	C09	C09CA	C09CA - Angiotensin II receptor blockers (ARBs), plain	157
unspecified urinary tract infection	2		matrix protein 2 inhibitor	1					C	C09	C09C	C09C - ANGIOTENSIN II RECEPTOR BLOCKERS (ARBs), PLAIN	157
unspecified probiotic	2		inflammasome complex inhibitor	1					C	C09	C09BA	C09BA - ACE inhibitors and diuretics	92
unspecified multiple sclerosis	2		hydrocarbons	1					C	C09	C09AA	C09AA - ACE inhibitors, plain	92
unspecified eczema	2		heparin cofactor 2 agonist	1					C	C09	C09A	C09A - ACE INHIBITORS, PLAIN	92
unspecified ear	2		glucocorticoid receptor agonistand beta-2 adrenergic receptor agonist	1					C	C09	C09XA	C09XA - Renin-inhibitors	90
unspecified dryness of the eye	2		glucocorticoid receptor agonistand antihistamine	1					C	C09	C09X	C09X - OTHER AGENTS ACTING ON THE RENIN-ANGIOTENSIN SYSTEM	90
unspecified cough	2		gamma-aminobutyric acid (GABA) receptoragonist	1					C	C10	C10	C10 - LIPID MODIFYING AGENTS	700
unspecified breast cancer	2		gamma-aminobutyric acid (GABA) receptor potentiator	1					C	C10	C10B	C10B - LIPID MODIFYING AGENTS, COMBINATIONS	696
unspecified antiepileptic	2		gamma-aminobutyric acid (GABA) receptor modulator	1					C	C10	C10BX	C10BX - HMG CoA reductase inhibitors, other combinations	695
trimetazidine	2		gamma-aminobutyric acid (GABA) receptor agonist	1					C	C10	C10A	C10A - LIPID MODIFYING AGENTS, PLAIN	407
tinidazole	2		farnesyl pyrophosphate synthase	1					C	C10	C10BA	C10BA - HMG CoA reductase inhibitors in combination with other lipid modifying agents	401
tibolone	2		estrogen receptor modulators	1					C	C10	C10AA	C10AA - HMG CoA reductase inhibitors	401
sulpiride	2		erythropoietin receptor activator	1					C	C10	C10AX	C10AX - Other lipid modifying agents	7
sulfasalazine	2		enzyme	1					C	C10	C10AB	C10AB - Fibrates	7
strontium ranelate	2		cholinesterase inhibitor	1					C	C10	C10AC	C10AC - Bile acid sequestrants	1
somatotropin	2		central dopamine receptor activator	1					D	D	D	D - DERMATOLOGICALS	84
sodium chloride	2		bile acids binder	1					D	D02	D02BB	D02BB - Protectives against UV-radiation for systemic use	1
sodium bicarbonate	2		bacterial protein synthesis inhibitor	1					D	D02	D02B	D02B - PROTECTIVES AGAINST UV-RADIATION	1
silibinin	2		antioxidants	1					D	D02	D02	D02 - EMOLLIENTS AND PROTECTIVES	1
sildenafil	2		antiinflammatory	1					D	D05	D05AX	D05AX - Other antipsoriatics for topical use	1
selenium	2		antihemophilic factor	1					D	D05	D05A	D05A - ANTIPSORIATICS FOR TOPICAL USE	1
pyridostigmine	2		antibodies	1					D	D05	D05	D05 - ANTIPSORIATICS	1
Omega-9 fatty acids	2		alpha blockers	1					D	D06	D06	D06 - ANTIBIOTICS AND CHEMOTHERAPEUTICS FOR DERMATOLOGICAL USE	2
omalizumab	2		alpha & beta adrenergic receptor antagonist	1					D	D06	D06BB	D06BB - Antivirals	1
nitroglycerin	2		alpha & beta adrenergic receptor agonist	1					D	D06	D06B	D06B - CHEMOTHERAPEUTICS FOR TOPICAL USE	1
mometasone furoate	2		5-hydroxytryptamine receptor 4 agonist	1					D	D06	D06AX	D06AX - Other antibiotics for topical use	1
minoxidil	2								D	D06	D06A	D06A - ANTIBIOTICS FOR TOPICAL USE	1
midodrine	2								D	D07	D07A	D07A - CORTICOSTEROIDS, PLAIN	32
Metixene	2								D	D07	D07	D07 - CORTICOSTEROIDS, DERMATOLOGICAL PREPARATIONS	32
methylprednisolone	2								D	D07	D07AC	D07AC - Corticosteroids, potent (group III)	22
methylphenidate	2								D	D07	D07X	D07X - CORTICOSTEROIDS, OTHER COMBINATIONS	21
mefenamic acid	2								D	D07	D07C	D07C - CORTICOSTEROIDS, COMBINATIONS WITH ANTIBIOTICS	15
liothyronine	2								D	D07	D07XC	D07XC - Corticosteroids, potent, other combinations	13
linoleic acid	2								D	D07	D07B	D07B - CORTICOSTEROIDS, COMBINATIONS WITH ANTISEPTICS	10
interferon	2								D	D07	D07CA	D07CA - Corticosteroids, weak, combinations with antibiotics	9
infliximab	2								D	D07	D07AA	D07AA - Corticosteroids, weak (group I)	9
gemfibrozil	2								D	D07	D07XA	D07XA - Corticosteroids, weak, other combinations	7
flupentixol	2								D	D07	D07BA	D07BA - Corticosteroids, weak, combinations with antiseptics	7
fingolimod	2								D	D07	D07CC	D07CC - Corticosteroids, potent, combinations with antibiotics	4
felodipine	2								D	D07	D07BC	D07BC - Corticosteroids, potent, combinations with antiseptics	3
eplerenone	2								D	D07	D07XB	D07XB - Corticosteroids, moderately potent, other combinations	2
eperisone	2								D	D07	D07CB	D07CB - Corticosteroids, moderately potent, combinations with antibiotics	2
docusate	2								D	D07	D07AB	D07AB - Corticosteroids, moderately potent (group II)	2
diosmin	2								D	D08	D08AG	D08AG - Iodine products	1
creatine	2								D	D08	D08A	D08A - ANTISEPTICS AND DISINFECTANTS	1
coenzyme Q10	2								D	D08	D08	D08 - ANTISEPTICS AND DISINFECTANTS	1
clenbuterol	2								D	D09	D09AA	D09AA - Medicated dressings with antiinfectives	1
citalopram	2								D	D09	D09A	D09A - MEDICATED DRESSINGS	1
chondroitin sulfate	2								D	D09	D09	D09 - MEDICATED DRESSINGS	1
chlorthalidone	2								D	D10	D10A	D10A - ANTI-ACNE PREPARATIONS FOR TOPICAL USE	30
cefixime	2								D	D10	D10	D10 - ANTI-ACNE PREPARATIONS	30
azelastine	2								D	D10	D10AD	D10AD - Retinoids for topical use in acne	26
alverine	2								D	D10	D10BA	D10BA - Retinoids for treatment of acne	20
aluminum hydroxide	2								D	D10	D10B	D10B - ANTI-ACNE PREPARATIONS FOR SYSTEMIC USE	20
alendronic acid	2								D	D10	D10AA	D10AA - Corticosteroids, combinations for treatment of acne	4
zonisamide	1								D	D11	D11A	D11A - OTHER DERMATOLOGICAL PREPARATIONS	25
zolpidem	1								D	D11	D11	D11 - OTHER DERMATOLOGICAL PREPARATIONS	25
vitamins	1								D	D11	D11AX	D11AX - Other dermatologicals	24
vardenafil	1								D	D11	D11AH	D11AH - Agents for dermatitis, excluding corticosteroids	1
valaciclovir	1								G	G	G	G - GENITO URINARY SYSTEM AND SEX HORMONES	411
unspecified varicose veins	1								G	G01	G01A	G01A - ANTIINFECTIVES AND ANTISEPTICS, EXCL. COMBINATIONS WITH CORTICOSTEROIDS	312
unspecified thrombocytopenia	1								G	G01	G01	G01 - GYNECOLOGICAL ANTIINFECTIVES AND ANTISEPTICS	312
unspecified stress	1								G	G01	G01AE	G01AE - Sulfonamides	242
unspecified osteoporosis	1								G	G01	G01AD	G01AD - Organic acids	72
unspecified lung	1								G	G01	G01AF	G01AF - Imidazole derivatives	2
unspecified leukemia	1								G	G02	G02C	G02C - OTHER GYNECOLOGICALS	11
unspecified joint	1								G	G02	G02	G02 - OTHER GYNECOLOGICALS	11
unspecified intracranial pressure	1								G	G02	G02CC	G02CC - Antiinflammatory products for vaginal administration	8
unspecified insomnia	1								G	G02	G02CB	G02CB - Prolactine inhibitors	3
unspecified immunosuppressant	1								G	G03	G03	G03 - SEX HORMONES AND MODULATORS OF THE GENITAL SYSTEM	74
unspecified hypothyroidism	1								G	G03	G03A	G03A - HORMONAL CONTRACEPTIVES FOR SYSTEMIC USE	60
unspecified heamophilia	1								G	G03	G03AB	G03AB - Progestogens and estrogens, sequential preparations	59
unspecified haemorrhoid	1								G	G03	G03AA	G03AA - Progestogens and estrogens, fixed combinations	59
unspecified dizziness	1								G	G03	G03C	G03C - ESTROGENS	44
unspecified dermatitis	1								G	G03	G03CA	G03CA - Natural and semisynthetic estrogens, plain	42
unspecified coronary artery disease	1								G	G03	G03F	G03F - PROGESTOGENS AND ESTROGENS IN COMBINATION	14
unspecified circulation	1								G	G03	G03FB	G03FB - Progestogens and estrogens, sequential preparations	13
unspecified autoimmune hepatitis	1								G	G03	G03D	G03D - PROGESTOGENS	11
unspecified arrhythmia	1								G	G03	G03FA	G03FA - Progestogens and estrogens, fixed combinations	10
unspecified antiviral	1								G	G03	G03DB	G03DB - Pregnadien derivatives	10
unspecified allergic rhinitis	1								G	G03	G03AC	G03AC - Progestogens	5
unspecified acne	1								G	G03	G03GB	G03GB - Ovulation stimulants, synthetic	3
trifluoperazine	1								G	G03	G03G	G03G - GONADOTROPINS AND OTHER OVULATION STIMULANTS	3
trenbolone acetate	1								G	G03	G03CX	G03CX - Other estrogens	2
travoprost	1								G	G03	G03EA	G03EA - Androgens and estrogens	1
tramadol	1								G	G03	G03E	G03E - ANDROGENS AND FEMALE SEX HORMONES IN COMBINATION	1
tolperisone	1								G	G03	G03DA	G03DA - Pregnen (4) derivatives	1
tizanidine	1								G	G03	G03BA	G03BA - 3-oxoandrosten (4) derivatives	1
ticagrelor	1								G	G03	G03B	G03B - ANDROGENS	1
testosterone undecanoate	1								G	G04	G04	G04 - UROLOGICALS	31
testosterone	1								G	G04	G04CA	G04CA - Alpha-adrenoreceptor antagonists	25
tamoxifen	1								G	G04	G04C	G04C - DRUGS USED IN BENIGN PROSTATIC HYPERTROPHY	25
tacrolimus	1								G	G04	G04CB	G04CB - Testosterone-5-alpha reductase inhibitors	7
sulodexide	1								G	G04	G04B	G04B - UROLOGICALS	7
statin	1								G	G04	G04BE	G04BE - Drugs used in erectile dysfunction	6
stanozolol	1								G	G04	G04BD	G04BD - Drugs for urinary frequency and incontinence	1
sotalol	1								H	H	H	H - SYSTEMIC HORMONAL PREPARATIONS, EXCL. SEX HORMONES AND INSULINS	515
solifenacin	1								H	H01	H01AC	H01AC - Somatropin and somatropin agonists	2
sodium hyaluronate & sodium chloride & disodium phosphate dodecahydrate & sodium phosphate & monobasic monohydrate	1								H	H01	H01A	H01A - ANTERIOR PITUITARY LOBE HORMONES AND ANALOGUES	2
sodium hyaluronate	1								H	H01	H01	H01 - PITUITARY AND HYPOTHALAMIC HORMONES AND ANALOGUES	2
sirolimus	1								H	H02	H02AB	H02AB - Glucocorticoids	19
scopolamine	1								H	H02	H02A	H02A - CORTICOSTEROIDS FOR SYSTEMIC USE, PLAIN	19
risperidone	1								H	H02	H02	H02 - CORTICOSTEROIDS FOR SYSTEMIC USE	19
ribavirin	1								H	H02	H02BX	H02BX - Corticosteroids for systemic use, combinations	2
rebamipide	1								H	H02	H02B	H02B - CORTICOSTEROIDS FOR SYSTEMIC USE, COMBINATIONS	2
prucalopride	1								H	H02	H02AA	H02AA - Mineralocorticoids	1
propafenone	1								H	H03	H03	H03 - THYROID THERAPY	495
procyclidine	1								H	H03	H03AA	H03AA - Thyroid hormones	494
prasterone sulfate	1								H	H03	H03A	H03A - THYROID PREPARATIONS	494
potassium citrate	1								H	H03	H03BB	H03BB - Sulfur-containing imidazole derivatives	2
polyethylene glycol	1								H	H03	H03B	H03B - ANTITHYROID PREPARATIONS	2
poliglusam	1								J	J	J	J - ANTIINFECTIVES FOR SYSTEMIC USE	16
pinaverium	1								J	J01	J01	J01 - ANTIBACTERIALS FOR SYSTEMIC USE	13
pilocarpine	1								J	J01	J01X	J01X - OTHER ANTIBACTERIALS	4
phenytoin	1								J	J01	J01RA	J01RA - Combinations of antibacterials	4
phentermine	1								J	J01	J01R	J01R - COMBINATIONS OF ANTIBACTERIALS	4
petrolatum	1								J	J01	J01CR	J01CR - Combinations of penicillins, incl. beta-lactamase inhibitors	4
oxcarbazepine	1								J	J01	J01CA	J01CA - Penicillins with extended spectrum	4
oxandrolone	1								J	J01	J01C	J01C - BETA-LACTAM ANTIBACTERIALS, PENICILLINS	4
olopatadine	1								J	J01	J01AA	J01AA - Tetracyclines	3
nortriptyline	1								J	J01	J01A	J01A - TETRACYCLINES	3
nitrofurantoin	1								J	J01	J01XD	J01XD - Imidazole derivatives	2
naphazoline	1								J	J01	J01MA	J01MA - Fluoroquinolones	2
nalmefene	1								J	J01	J01M	J01M - QUINOLONE ANTIBACTERIALS	2
mosapride	1								J	J01	J01DD	J01DD - Third-generation cephalosporins	2
mirtazapine	1								J	J01	J01D	J01D - OTHER BETA-LACTAM ANTIBACTERIALS	2
metolazone	1								J	J01	J01XE	J01XE - Nitrofuran derivatives	1
methyldopa	1								J	J01	J01XC	J01XC - Steroid antibacterials	1
methimazole	1								J	J01	J01FA	J01FA - Macrolides	1
metenolone enanthate	1								J	J01	J01F	J01F - MACROLIDES, LINCOSAMIDES AND STREPTOGRAMINS	1
metamizole	1								J	J05	J05A	J05A - DIRECT ACTING ANTIVIRALS	3
melatonin	1								J	J05	J05	J05 - ANTIVIRALS FOR SYSTEMIC USE	3
medroxyprogesterone acetate	1								J	J05	J05AB	J05AB - Nucleosides and nucleotides excl. reverse transcriptase inhibitors	2
mebendazole	1								J	J05	J05AP	J05AP - Antivirals for treatment of HCV infections	1
manidipine	1								L	L	L	L - ANTINEOPLASTIC AND IMMUNOMODULATING AGENTS	104
loxoprofen	1								L	L01	L01	L01 - ANTINEOPLASTIC AGENTS	38
lorcaserin	1								L	L01	L01XX	L01XX - Other antineoplastic agents	33
lipoic acid	1								L	L01	L01X	L01X - OTHER ANTINEOPLASTIC AGENTS	33
levofloxacin	1								L	L01	L01BA	L01BA - Folic acid analogues	5
levodopa	1								L	L01	L01B	L01B - ANTIMETABOLITES	5
letrozole	1								L	L02	L02	L02 - ENDOCRINE THERAPY	47
lercanidipine	1								L	L02	L02A	L02A - HORMONES AND RELATED AGENTS	44
leflunomide	1								L	L02	L02AA	L02AA - Estrogens	42
lamotrigine	1								L	L02	L02B	L02B - HORMONE ANTAGONISTS AND RELATED AGENTS	4
labetalol	1								L	L02	L02BG	L02BG - Aromatase inhibitors	3
kelp	1								L	L02	L02BA	L02BA - Anti-estrogens	1
iodine	1								L	L02	L02AE	L02AE - Gonadotropin releasing hormone analogues	1
immunoglobulin	1								L	L02	L02AB	L02AB - Progestogens	1
imipramine	1								L	L04	L04A	L04A - IMMUNOSUPPRESSANTS	25
haloperidol	1								L	L04	L04	L04 - IMMUNOSUPPRESSANTS	25
goserelin	1								L	L04	L04AX	L04AX - Other immunosuppressants	14
fusidic acid	1								L	L04	L04AB	L04AB - Tumor necrosis factor alpha (TNF-Î±) inhibitors	7
fluvoxamine	1								L	L04	L04AA	L04AA - Selective immunosuppressants	4
fluticasone furoate	1								L	L04	L04AD	L04AD - Calcineurin inhibitors	1
fluorometholone	1								M	M	M	M - MUSCULO-SKELETAL SYSTEM	633
fludrocortisone	1								M	M01	M01	M01 - ANTIINFLAMMATORY AND ANTIRHEUMATIC PRODUCTS	488
fibre	1								M	M01	M01BA	M01BA - Antiinflammatory/antirheumatic agents in combination with corticosteroids	309
exemestane	1								M	M01	M01B	M01B - ANTIINFLAMMATORY/ANTIRHEUMATIC AGENTS IN COMBINATION	309
etoricoxib	1								M	M01	M01A	M01A - ANTIINFLAMMATORY AND ANTIRHEUMATIC PRODUCTS, NON-STEROIDS	212
etanercept	1								M	M01	M01AE	M01AE - Propionic acid derivatives	81
erythropoietin	1								M	M01	M01AA	M01AA - Butylpyrazolidines	72
epinephrine	1								M	M01	M01AH	M01AH - Coxibs	34
dulaglutide	1								M	M01	M01AB	M01AB - Acetic acid derivatives and related substances	18
doxazosin	1								M	M01	M01AX	M01AX - Other antiinflammatory and antirheumatic agents, non-steroids	12
dorzolamide	1								M	M01	M01AC	M01AC - Oxicams	8
donepezil	1								M	M01	M01AG	M01AG - Fenamates	2
dienogest	1								M	M02	M02A	M02A - TOPICAL PRODUCTS FOR JOINT AND MUSCULAR PAIN	97
dexamethasone	1								M	M02	M02	M02 - TOPICAL PRODUCTS FOR JOINT AND MUSCULAR PAIN	97
desvenlafaxine	1								M	M02	M02AA	M02AA - Antiinflammatory preparations, non-steroids for topical use	96
dalfampridine	1								M	M02	M02AX	M02AX - Other topical products for joint and muscular pain	1
colesevelam	1								M	M03	M03BX	M03BX - Other centrally acting agents	5
colchicine	1								M	M03	M03B	M03B - MUSCLE RELAXANTS, CENTRALLY ACTING AGENTS	5
clonazepam	1								M	M03	M03	M03 - MUSCLE RELAXANTS	5
clidinium	1								M	M04	M04A	M04A - ANTIGOUT PREPARATIONS	15
clarithromycin	1								M	M04	M04	M04 - ANTIGOUT PREPARATIONS	15
ciprofloxacin	1								M	M04	M04AA	M04AA - Preparations inhibiting uric acid production	14
cilazapril	1								M	M04	M04AC	M04AC - Preparations with no effect on uric acid metabolism	1
chromium	1								M	M05	M05B	M05B - DRUGS AFFECTING BONE STRUCTURE AND MINERALIZATION	174
carbimazole	1								M	M05	M05	M05 - DRUGS FOR TREATMENT OF BONE DISEASES	174
canagliflozin	1								M	M05	M05BB	M05BB - Bisphosphonates, combinations	172
calcitriol	1								M	M05	M05BX	M05BX - Other drugs affecting bone structure and mineralization	2
caffeine	1								M	M05	M05BA	M05BA - Bisphosphonates	2
buspirone	1								N	N	N	N - NERVOUS SYSTEM	450
bromazepam	1								N	N02	N02	N02 - ANALGESICS	341
brimonidine	1								N	N02	N02AJ	N02AJ - Opioids in combination with non-opioid analgesics	337
beta carotene	1								N	N02	N02A	N02A - OPIOIDS	337
beclomethasone dipropionate	1								N	N02	N02B	N02B - OTHER ANALGESICS AND ANTIPYRETICS	333
balsalazide	1								N	N02	N02BA	N02BA - Salicylic acid and derivatives	309
baclofen	1								N	N02	N02BE	N02BE - Anilides	28
atropine	1								N	N02	N02CC	N02CC - Selective serotonin (5HT1) agonists	5
aripiprazole	1								N	N02	N02C	N02C - ANTIMIGRAINE PREPARATIONS	5
apixaban	1								N	N02	N02BB	N02BB - Pyrazolones	1
antihemophilic factor, human recombinant	1								N	N02	N02AX	N02AX - Other opioids	1
anastrozole	1								N	N03	N03A	N03A - ANTIEPILEPTICS	46
amiodarone	1								N	N03	N03	N03 - ANTIEPILEPTICS	46
amantadine	1								N	N03	N03AX	N03AX - Other antiepileptics	37
albendazole	1								N	N03	N03AF	N03AF - Carboxamide derivatives	6
agomelatine	1								N	N03	N03AG	N03AG - Fatty acid derivatives	5
acyclovir	1								N	N03	N03AE	N03AE - Benzodiazepine derivatives	1
activated charcoal	1								N	N03	N03AB	N03AB - Hydantoin derivatives	1
acetylcysteine	1								N	N04	N04	N04 - ANTI-PARKINSON DRUGS	8
acetazolamide	1								N	N04	N04B	N04B - DOPAMINERGIC AGENTS	5
									N	N04	N04BC	N04BC - Dopamine agonists	3
									N	N04	N04AA	N04AA - Tertiary amines	3
									N	N04	N04A	N04A - ANTICHOLINERGIC AGENTS	3
									N	N04	N04BB	N04BB - Adamantane derivatives	1
									N	N04	N04BA	N04BA - Dopa and dopa derivatives	1
									N	N05	N05	N05 - PSYCHOLEPTICS	18
									N	N05	N05A	N05A - ANTIPSYCHOTICS	10
									N	N05	N05B	N05B - ANXIOLYTICS	7
									N	N05	N05BB	N05BB - Diphenylmethane derivatives	5
									N	N05	N05AH	N05AH - Diazepines, oxazepines, thiazepines and oxepines	4
									N	N05	N05C	N05C - HYPNOTICS AND SEDATIVES	3
									N	N05	N05AX	N05AX - Other antipsychotics	2
									N	N05	N05AL	N05AL - Benzamides	2
									N	N05	N05AF	N05AF - Thioxanthene derivatives	2
									N	N05	N05CM	N05CM - Other hypnotics and sedatives	1
									N	N05	N05CH	N05CH - Melatonin receptor agonists	1
									N	N05	N05CF	N05CF - Benzodiazepine related drugs	1
									N	N05	N05BE	N05BE - Azaspirodecanedione derivatives	1
									N	N05	N05BA	N05BA - Benzodiazepine derivatives	1
									N	N05	N05AD	N05AD - Butyrophenone derivatives	1
									N	N05	N05AB	N05AB - Phenothiazines with piperazine structure	1
									N	N06	N06	N06 - PSYCHOANALEPTICS	55
									N	N06	N06A	N06A - ANTIDEPRESSANTS	53
									N	N06	N06AB	N06AB - Selective serotonin reuptake inhibitors	40
									N	N06	N06AX	N06AX - Other antidepressants	10
									N	N06	N06CA	N06CA - Antidepressants in combination with psycholeptics	9
									N	N06	N06C	N06C - PSYCHOLEPTICS AND PSYCHOANALEPTICS IN COMBINATION	9
									N	N06	N06AA	N06AA - Non-selective monoamine reuptake inhibitors	5
									N	N06	N06B	N06B - PSYCHOSTIMULANTS, AGENTS USED FOR ADHD AND NOOTROPICS	3
									N	N06	N06BA	N06BA - Centrally acting sympathomimetics	2
									N	N06	N06DA	N06DA - Anticholinesterases	1
									N	N06	N06D	N06D - ANTI-DEMENTIA DRUGS	1
									N	N06	N06BC	N06BC - Xanthine derivatives	1
									N	N07	N07	N07 - OTHER NERVOUS SYSTEM DRUGS	15
									N	N07	N07CA	N07CA - Antivertigo preparations	8
									N	N07	N07C	N07C - ANTIVERTIGO PREPARATIONS	8
									N	N07	N07B	N07B - DRUGS USED IN ADDICTIVE DISORDERS	3
									N	N07	N07A	N07A - PARASYMPATHOMIMETICS	3
									N	N07	N07BA	N07BA - Drugs used in nicotine dependence	2
									N	N07	N07AA	N07AA - Anticholinesterases	2
									N	N07	N07XX	N07XX - Other nervous system drugs	1
									N	N07	N07X	N07X - OTHER NERVOUS SYSTEM DRUGS	1
									N	N07	N07BB	N07BB - Drugs used in alcohol dependence	1
									N	N07	N07AX	N07AX - Other parasympathomimetics	1
									P	P	P	P - ANTIPARASITIC PRODUCTS, INSECTICIDES AND REPELLENTS	10
									P	P01	P01	P01 - ANTIPROTOZOALS	5
									P	P01	P01BA	P01BA - Aminoquinolines	3
									P	P01	P01B	P01B - ANTIMALARIALS	3
									P	P01	P01AB	P01AB - Nitroimidazole derivatives	2
									P	P01	P01A	P01A - AGENTS AGAINST AMOEBIASIS AND OTHER PROTOZOAL DISEASES	2
									P	P02	P02C	P02C - ANTINEMATODAL AGENTS	5
									P	P02	P02	P02 - ANTHELMINTICS	5
									P	P02	P02CB	P02CB - Piperazine and derivatives	3
									P	P02	P02CA	P02CA - Benzimidazole derivatives	2
									R	R	R	R - RESPIRATORY SYSTEM	161
									R	R01	R01A	R01A - DECONGESTANTS AND OTHER NASAL PREPARATIONS FOR TOPICAL USE	44
									R	R01	R01	R01 - NASAL PREPARATIONS	44
									R	R01	R01AD	R01AD - Corticosteroids	30
									R	R01	R01AX	R01AX - Other nasal preparations	6
									R	R01	R01AA	R01AA - Sympathomimetics, plain	6
									R	R01	R01AB	R01AB - Sympathomimetics, combinations excl. corticosteroids	5
									R	R01	R01AC	R01AC - Antiallergic agents, excl. corticosteroids	3
									R	R02	R02AX	R02AX - Other throat preparations	5
									R	R02	R02A	R02A - THROAT PREPARATIONS	5
									R	R02	R02	R02 - THROAT PREPARATIONS	5
									R	R03	R03	R03 - DRUGS FOR OBSTRUCTIVE AIRWAY DISEASES	88
									R	R03	R03A	R03A - ADRENERGICS, INHALANTS	78
									R	R03	R03AK	R03AK - Adrenergics in combination with corticosteroids or other drugs, excl. anticholinergics	76
									R	R03	R03AC	R03AC - Selective beta-2-adrenoreceptor agonists	65
									R	R03	R03AL	R03AL - Adrenergics in combination with anticholinergics incl. triple combinations with corticosteroids	60
									R	R03	R03CC	R03CC - Selective beta-2-adrenoreceptor agonists	58
									R	R03	R03C	R03C - ADRENERGICS FOR SYSTEMIC USE	58
									R	R03	R03BA	R03BA - Glucocorticoids	23
									R	R03	R03B	R03B - OTHER DRUGS FOR OBSTRUCTIVE AIRWAY DISEASES, INHALANTS	23
									R	R03	R03D	R03D - OTHER SYSTEMIC DRUGS FOR OBSTRUCTIVE AIRWAY DISEASES	19
									R	R03	R03DC	R03DC - Leukotriene receptor antagonists	16
									R	R03	R03DX	R03DX - Other systemic drugs for obstructive airway diseases	2
									R	R03	R03DA	R03DA - Xanthines	1
									R	R03	R03AA	R03AA - Alpha- and beta-adrenoreceptor agonists	1
									R	R05	R05CB	R05CB - Mucolytics	1
									R	R05	R05C	R05C - EXPECTORANTS, EXCL. COMBINATIONS WITH COUGH SUPPRESSANTS	1
									R	R05	R05	R05 - COUGH AND COLD PREPARATIONS	1
									R	R06	R06A	R06A - ANTIHISTAMINES FOR SYSTEMIC USE	61
									R	R06	R06	R06 - ANTIHISTAMINES FOR SYSTEMIC USE	61
									R	R06	R06AX	R06AX - Other antihistamines for systemic use	42
									R	R06	R06AE	R06AE - Piperazine derivatives	20
									S	S	S	S - SENSORY ORGANS	132
									S	S01	S01	S01 - OPHTHALMOLOGICALS	132
									S	S01	S01XA	S01XA - Other ophthalmologicals	79
									S	S01	S01X	S01X - OTHER OPHTHALMOLOGICALS	79
									S	S01	S01B	S01B - ANTIINFLAMMATORY AGENTS	36
									S	S01	S01C	S01C - ANTIINFLAMMATORY AGENTS AND ANTIINFECTIVES IN COMBINATION	32
									S	S01	S01CC	S01CC - Antiinflammatory agents, non-steroids and antiinfectives in combination	18
									S	S01	S01BC	S01BC - Antiinflammatory agents, non-steroids	18
									S	S01	S01BA	S01BA - Corticosteroids, plain	18
									S	S01	S01CA	S01CA - Corticosteroids and antiinfectives in combination	14
									S	S01	S01CB	S01CB - Corticosteroids/antiinfectives/mydriatics in combination	12
									S	S01	S01BB	S01BB - Corticosteroids and mydriatics in combination	11
									S	S01	S01E	S01E - ANTIGLAUCOMA PREPARATIONS AND MIOTICS	9
									S	S01	S01G	S01G - DECONGESTANTS AND ANTIALLERGICS	8
									S	S01	S01GA	S01GA - Sympathomimetics used as decongestants	5
									S	S01	S01ED	S01ED - Beta blocking agents	5
									S	S01	S01A	S01A - ANTIINFECTIVES	4
									S	S01	S01GX	S01GX - Other antiallergics	3
									S	S01	S01FA	S01FA - Anticholinergics	2
									S	S01	S01F	S01F - MYDRIATICS AND CYCLOPLEGICS	2
									S	S01	S01EC	S01EC - Carbonic anhydrase inhibitors	2
									S	S01	S01EA	S01EA - Sympathomimetics in glaucoma therapy	2
									S	S01	S01AE	S01AE - Fluoroquinolones	2
									S	S01	S01EE	S01EE - Prostaglandin analogues	1
									S	S01	S01EB	S01EB - Parasympathomimetics	1
									S	S01	S01AD	S01AD - Antivirals	1
									S	S01	S01AA	S01AA - Antibiotics	1
									S	S02	S02	S02 - OTOLOGICALS	12
									S	S02	S02BA	S02BA - Corticosteroids	11
									S	S02	S02B	S02B - CORTICOSTEROIDS	11
									S	S02	S02CA	S02CA - Corticosteroids and antiinfectives in combination	8
									S	S02	S02C	S02C - CORTICOSTEROIDS AND ANTIINFECTIVES IN COMBINATION	8
									S	S02	S02AA	S02AA - Antiinfectives	1
									S	S02	S02A	S02A - ANTIINFECTIVES	1
									S	S03	S03	S03 - OPHTHALMOLOGICAL AND OTOLOGICAL PREPARATIONS	12
									S	S03	S03CA	S03CA - Corticosteroids and antiinfectives in combination	11
									S	S03	S03C	S03C - CORTICOSTEROIDS AND ANTIINFECTIVES IN COMBINATION	11
									S	S03	S03BA	S03BA - Corticosteroids	11
									S	S03	S03B	S03B - CORTICOSTEROIDS	11
									S	S03	S03AA	S03AA - Antiinfectives	1
									S	S03	S03A	S03A - ANTIINFECTIVES	1
									V	V	V	V - VARIOUS	14
									V	V03	V03AB	V03AB - Antidotes	8
									V	V03	V03A	V03A - ALL OTHER THERAPEUTIC PRODUCTS	8
									V	V03	V03	V03 - ALL OTHER THERAPEUTIC PRODUCTS	8
									V	V04	V04C	V04C - OTHER DIAGNOSTIC AGENTS	7
									V	V04	V04	V04 - DIAGNOSTIC AGENTS	7
									V	V04	V04CB	V04CB - Tests for fat absorption	6
									V	V04	V04CG	V04CG - Tests for gastric secretion	1

## Sheet: Table S2
Table S2: Counts of self-reported drugs reported by ~500,000 UKB participants.
sort	Category UKB	N UKB	Category UKB	Coding UKB	Medication ATC code UKB	Drug name UKB	repeated entry	only in UKB	name QBB	N QBB	N UKB incl repeated	rank QBB	rank UKB	%QBB	%UKB
1	vitamin d product	2520	vitamin d product	1140870954	A11CC	Vitamin D	FALSE	FALSE	Vitamin D	1029	2605	1	68	0.1715	0.00521
2	calciferol	85	calciferol	1140909876	A11CC05	Vitamin D	TRUE	FALSE	Vitamin D	1029
3	metformin	16092	metformin	1140884600	A10BA02	Metformin	FALSE	FALSE	metformin	533	16641	2	17	0.0888333	0.033282
4	glucophage 500mg tablet	549	glucophage 500mg tablet	1140874686	A10BA02	Metformin	TRUE	FALSE	Metformin	533
5	levothyroxine sodium	24081	levothyroxine sodium	1141191044	H03AA01	Levothyroxine	FALSE	FALSE	levothyroxine	492	32279	3	7	0.082	0.064558
6	thyroxine product	6387	thyroxine product	1140884516	H03AA01	Levothyroxine	TRUE	FALSE	levothyroxine	492
7	thyroxine sodium	1456	thyroxine sodium	1140874852	H03AA01	Levothyroxine	TRUE	FALSE	Levothyroxine	492
8	sodium thyroxine	227	sodium thyroxine	1140910814	H03AA01	Levothyroxine	TRUE	FALSE	Levothyroxine	492
9	eltroxin 25micrograms tablet	128	eltroxin 25micrograms tablet	1141178036	H03AA01	Levothyroxine	TRUE	FALSE	Levothyroxine	492
10	multivitamins	16504	multivitamins	1140852976	A11BA	Multivitamin	FALSE	FALSE	Multivitamin	462	16961	4	16	0.077	0.033922
11	multivitamins capsule	392	multivitamins capsule	1140909766	A11B	Multivitamin	TRUE	FALSE	Multivitamin	462
12	vitamin c+a+d tablet	48	vitamin c+a+d tablet	1140877612	A11B	Multivitamin	TRUE	FALSE	Multivitamin	462
13	ketovite tablet	17	ketovite tablet	1140870786	A11B	Multivitamin	TRUE	FALSE	Multivitamin	462
14	aspirin	72926	aspirin	1140868226	A01AD05 |B01AC06 |N02BA01	Acetylsalicylic Acid	FALSE	FALSE	acetylsalicylic acid	309	76596	5	2	0.0515	0.153192
15	aspirin 75mg tablet	3546	aspirin 75mg tablet	1140861806	A01AD05 |B01AC06 |N02BA01	Acetylsalicylic Acid	TRUE	FALSE	Acetylsalicylic Acid	309
16	micropirin 75mg e/c tablet	88	micropirin 75mg e/c tablet	1141177826	B01AC06	Acetylsalicylic Acid	TRUE	FALSE	Acetylsalicylic Acid	309
17	aspro clear maximum strength soluble tablet	16	aspro clear maximum strength soluble tablet	1140909480	N02BA01	Acetylsalicylic Acid	TRUE	FALSE	Acetylsalicylic Acid	309
18	disprin direct dispersible tablet	16	disprin direct dispersible tablet	1140882192	N02BA01	Acetylsalicylic Acid	TRUE	FALSE	Acetylsalicylic Acid	309
19	acetylsalicylic acid	4						FALSE	acetylsalicylic acid	309
20	atorvastatin	21516	atorvastatin	1141146234	C10AA05	Atorvastatin	FALSE	FALSE	atorvastatin	234	25481	6	11	0.039	0.050962
21	lipitor 10mg tablet	3965	lipitor 10mg tablet	1141146138	C10AA05	Atorvastatin	TRUE	FALSE	atorvastatin	234
22	insulin product	5785	insulin product	1140883066	A10A	Insulin	FALSE	FALSE	insulin aspart	224	5785	7	37	0.0373333	0.01157
23	ferrous sulphate	2962	ferrous sulphate	1140870390	B03AA07	Iron	FALSE	FALSE	Iron	223	5349	8	40	0.0371667	0.010698
24	iron product	1721	iron product	1140888386	B03A	Iron	TRUE	FALSE	Iron	223
25	ferrous salt product	233	ferrous salt product	1140888390	B03A	Iron	TRUE	FALSE	Iron	223
26	iron sulphate	233	iron sulphate	1140910548	B03A	Iron	TRUE	FALSE	Iron	223
27	ferrograd 325mg filmtab	84	ferrograd 325mg filmtab	1140870296	B03AA02	Iron	TRUE	FALSE	Iron	223
28	fersamal tablet	59	fersamal tablet	1141177686	B03AA02	Iron	TRUE	FALSE	Iron	223
29	feso4 - ferrous sulphate	28	feso4 - ferrous sulphate	1140910436	B03AA07	Iron	TRUE	FALSE	Iron	223
30	fersaday 304mg tablet	18	fersaday 304mg tablet	1140921160	B03AA07	Iron	TRUE	FALSE	Iron	223
31	fersaday 322mg tablet	11	fersaday 322mg tablet	1140870354	B03AA07	Iron	TRUE	FALSE	Iron	223
32	calcium salts	3246	calcium salts	1140870788	A12AA20	Calcium	FALSE	FALSE	calcium	169	3246	9	59	0.0281667	0.006492
33	omega-3/fish oil supplement	19877	omega-3/fish oil supplement	1193	C10AX06	Fish Oil	FALSE	FALSE	Omega-3 fatty acids	165	19877	10	14	0.0275	0.039754
34	vitamin b compound tablet	3930	vitamin b compound tablet	1140871024	A11EA	Vitamin B	FALSE	FALSE	vitamin b	155	3930	11	52	0.0258333	0.00786
35	rosuvastatin	3512	rosuvastatin	1141192410	C10AA07	Rosuvastatin	FALSE	FALSE	rosuvastatin	141	3860	12	54	0.0235	0.00772
36	crestor 10mg tablet	348	crestor 10mg tablet	1141192414	C10AA07	Rosuvastatin	TRUE	FALSE	Rosuvastatin	141
37	gliclazide	5230	gliclazide	1140874744	A10BB09	Gliclazide	FALSE	FALSE	gliclazide	121	5399	13	39	0.0201667	0.010798
38	glyclizide	98	glyclizide	1140910566	A10BB09	Gliclazide	TRUE	FALSE	Gliclazide	121
39	diamicron 80mg tablet	71	diamicron 80mg tablet	1140874746	A10BB09	Gliclazide	TRUE	FALSE	Gliclazide	121
40	valsartan	2592	valsartan	1141145660	C09CA03	Valsartan	FALSE	FALSE	valsartan	87	3105	14	62	0.0145	0.00621
41	diovan 40mg capsule	513	diovan 40mg capsule	1141145668	C09CA03	Valsartan	TRUE	FALSE	Valsartan	87
42	amlodipine	26198	amlodipine	1140879802	C08CA01	Amlodipine	FALSE	FALSE	amlodipine	74	26480	15	10	0.0123333	0.05296
43	istin 5mg tablet	182	istin 5mg tablet	1140861202	C08CA01	Amlodipine	TRUE	FALSE	Amlodipine	74
44	amlostin 5mg tablet	100	amlostin 5mg tablet	1141200400	C08CA01	Amlodipine	TRUE	FALSE	Amlodipine	74
45	esomeprazole	1852	esomeprazole	1141177526	A02BC05	Esomeprazole	FALSE	FALSE	esomeprazole	73	2746	16	67	0.0121667	0.005492
46	nexium 20mg tablet	894	nexium 20mg tablet	1141177532	A02BC05	Esomeprazole	TRUE	FALSE	Esomeprazole	73
47	rabeprazole sodium	945	rabeprazole sodium	1141168584	A02BC04	Rabeprazole	FALSE	FALSE	Rabeprazole	72	1248	17	100	0.012	0.002496
48	pariet 10mg e/c tablet	303	pariet 10mg e/c tablet	1141168590	A02BC04	Rabeprazole	TRUE	FALSE	Rabeprazole	72
49	folic acid product	4698	folic acid product	1140870422	B03BB01	Folic Acid	FALSE	FALSE	folic acid	60	4711	18	43	0.01	0.009422
50	folate product	13	folate product	1140910552	B03BB01	Folic Acid	TRUE	FALSE	Folic Acid	60
51	ventolin 100micrograms inhaler	15742	ventolin 100micrograms inhaler	1140861998	R03AC02 |R03CC02	Salbutamol	FALSE	FALSE	Salbutamol	56	29483	19	8	0.00933333	0.058966
52	salbutamol	6550	salbutamol	1140881856	R03AC02 |R03CC02	Salbutamol	TRUE	FALSE	salbutamol	56
53	salbutamol 100micrograms spacehaler	3499	salbutamol 100micrograms spacehaler	1140926606	R03AC02	Salbutamol	TRUE	FALSE	Salbutamol	56
54	salamol 100micrograms inhaler	1633	salamol 100micrograms inhaler	1140862086	R03AC02	Salbutamol	TRUE	FALSE	Salbutamol	56
55	salbutamol product	822	salbutamol product	1141157486	R03AC02 |R03CC02	Salbutamol	TRUE	FALSE	Salbutamol	56
56	airomir 100micrograms cfc-free inhaler	252	airomir 100micrograms cfc-free inhaler	1140917034	R03AC02	Salbutamol	TRUE	FALSE	Salbutamol	56
57	combivent inhaler	218	combivent inhaler	1140864734	R03AL02	Salbutamol	TRUE	FALSE	Salbutamol	56
58	ventolin 2mg tablet	212	ventolin 2mg tablet	1140862060	R03CC02	Salbutamol	TRUE	FALSE	Salbutamol	56
59	salbuvent 100micrograms inhaler	121	salbuvent 100micrograms inhaler	1140855380	R03AC02	Salbutamol	TRUE	FALSE	Salbutamol	56
60	salbulin 100micrograms inhaler	98	salbulin 100micrograms inhaler	1140861996	R03AC02	Salbutamol	TRUE	FALSE	Salbutamol	56
61	easyhaler salbutamol 100mcg breath-actuated dry powder inh	92	easyhaler salbutamol 100mcg breath-actuated dry powder inh	1141200640	R03AC02	Salbutamol	TRUE	FALSE	Salbutamol	56
62	ventodisks 200micrograms/blister disks+diskhaler	90	ventodisks 200micrograms/blister disks+diskhaler	1140862016	R03AC02	Salbutamol	TRUE	FALSE	Salbutamol	56
63	asmasal 100micrograms spacehaler	75	asmasal 100micrograms spacehaler	1141153172	R03AC02	Salbutamol	TRUE	FALSE	Salbutamol	56
64	ventolin cr 4mg m/r tablet	35	ventolin cr 4mg m/r tablet	1140862070	R03CC02	Salbutamol	TRUE	FALSE	Salbutamol	56
65	pulvinal salbutamol 200mcg breath-act dry powder inhaler	28	pulvinal salbutamol 200mcg breath-act dry powder inhaler	1141179066	R03AC02	Salbutamol	TRUE	FALSE	Salbutamol	56
66	steri-neb salamol 2.5mg/2.5ml nebulisation unit	16	steri-neb salamol 2.5mg/2.5ml nebulisation unit	1140862008	R03AC02	Salbutamol	TRUE	FALSE	Salbutamol	56
67	glimepiride	544	glimepiride	1141152590	A10BB12	Glimepiride	FALSE	FALSE	glimepiride	54	593	20	126	0.009	0.001186
68	amaryl 1mg tablet	49	amaryl 1mg tablet	1141156984	A10BB12	Glimepiride	TRUE	FALSE	Glimepiride	54
69	bisoprolol	9571	bisoprolol	1140879760	C07AB07	Bisoprolol	FALSE	FALSE	bisoprolol	45	10054	21	21	0.0075	0.020108
70	cardicor 1.25mg tablet	483	cardicor 1.25mg tablet	1141171152	C07AB07	Bisoprolol	TRUE	FALSE	Bisoprolol	45
71	atenolol	20566	atenolol	1140866738	C07AB03	Atenolol	FALSE	FALSE	atenolol	44	20638	22	13	0.00733333	0.041276
72	tenormin 25 tablet	72	tenormin 25 tablet	1140866756	C07AB03	Atenolol	TRUE	FALSE	Atenolol	44
73	ethinylestradiol	21	ethinylestradiol	1141181220	G03CA01 |L02AA03	Ethinyl Estradiol	FALSE	FALSE	ethinylestradiol	42	21	23	225	0.007	4.2e-05
74	losartan	6067	losartan	1140916356	C09CA01	Losartan	FALSE	FALSE	losartan	42	6660	24	31	0.007	0.01332
75	cozaar 25mg tablet	593	cozaar 25mg tablet	1141179974	C09CA01	Losartan	TRUE	FALSE	Losartan	42
76	clopidogrel	4101	clopidogrel	1141168318	B01AC04	Clopidogrel	FALSE	FALSE	clopidogrel	38	4338	25	48	0.00633333	0.008676
77	plavix 75mg tablet	237	plavix 75mg tablet	1141168322	B01AC04	Clopidogrel	TRUE	FALSE	Clopidogrel	38
78	omeprazole	35724	omeprazole	1140865634	A02BC01	Omeprazole	FALSE	FALSE	omeprazole	35	36124	26	5	0.00583333	0.072248
79	losec 10mg capsule	400	losec 10mg capsule	1140909578	A02BC01	Omeprazole	TRUE	FALSE	Omeprazole	35
80	celecoxib	553	celecoxib	1141176662	L01XX33 |M01AH01	Celecoxib	FALSE	FALSE	celecoxib	33	1178	27	106	0.0055	0.002356
81	celebrex 100mg capsule	424	celebrex 100mg capsule	1141176668	M01AH01	Celecoxib	TRUE	FALSE	Celecoxib	33
82	celebrex 200mg capsule	201	celebrex 200mg capsule	1141176670	M01AH01	Celecoxib	TRUE	FALSE	Celecoxib	33
83	indapamide	2078	indapamide	1140866078	C03BA11	Indapamide	FALSE	FALSE	indapamide	32	2194	28	76	0.00533333	0.004388
84	natrilix sr 1.5mg m/r tablet	116	natrilix sr 1.5mg m/r tablet	1141146378	C03BA11	Indapamide	TRUE	FALSE	Indapamide	32
85	pantoprazole	1040	pantoprazole	1140929012	A02BC02	Pantoprazole	FALSE	FALSE	pantoprazole	31	1159	29	107	0.00516667	0.002318
86	protium 20mg e/c tablet	119	protium 20mg e/c tablet	1141164616	A02BC02	Pantoprazole	TRUE	FALSE	Pantoprazole	31
87	perindopril	7857	perindopril	1140888560	C09AA04	Perindopril	FALSE	FALSE	perindopril	30	8036	30	24	0.005	0.016072
88	coversyl 2mg tablet	179	coversyl 2mg tablet	1140860802	C09AA04	Perindopril	TRUE	FALSE	Perindopril	30
89	paracetamol	102058	paracetamol	2038460150	N02BE01	Acetaminophen	FALSE	FALSE	acetaminophen	28	102222	31	1	0.00466667	0.204444
90	paracetamol product	46	paracetamol product	1140868240	N02BE01	Acetaminophen	TRUE	FALSE	Acetaminophen	28
91	anadin paracetamol 500mg tablet	34	anadin paracetamol 500mg tablet	1141188516	N02BE01	Acetaminophen	TRUE	FALSE	Acetaminophen	28
92	panadol 500mg tablet	28	panadol 500mg tablet	1140856240	N02BE01	Acetaminophen	TRUE	FALSE	Acetaminophen	28
93	panadol 500mg capsule	25	panadol 500mg capsule	1140856238	N02BE01	Acetaminophen	TRUE	FALSE	Acetaminophen	28
94	hedex tablet	23	hedex tablet	1140911758	N02BE01	Acetaminophen	TRUE	FALSE	Acetaminophen	28
95	acetaminophen	8						FALSE	acetaminophen	28
96	lisinopril	15755	lisinopril	1140860696	C09AA03	Lisinopril	FALSE	FALSE	lisinopril	27	15827	32	18	0.0045	0.031654
97	vitamin e product	1931	vitamin e product	1140871112	A11HA	Vitamin E	FALSE	FALSE	Vitamin E	27	1949	33	79	0.0045	0.003898
98	zestril 2.5mg tablet	72	zestril 2.5mg tablet	1140860714	C09AA03	Lisinopril	TRUE	FALSE	Lisinopril	27
99	vitamin e product [ctsu]	18	vitamin e product [ctsu]	1185	A11H	Vitamin E	TRUE	FALSE	Vitamin E	27
100	ranitidine	9335	ranitidine	1140879406	A02BA02	Ranitidine	FALSE	FALSE	ranitidine	25	9685	34	23	0.00416667	0.01937
101	zantac 75 tablet	277	zantac 75 tablet	1140916980	A02BA02	Ranitidine	TRUE	FALSE	Ranitidine	25
102	gavilast-p 75mg tablet	73	gavilast-p 75mg tablet	1141188426	A02BA	Ranitidine	TRUE	FALSE	Ranitidine	25
103	escitalopram	957	escitalopram	1141180212	N06AB10	Escitalopram	FALSE	FALSE	escitalopram	22	1413	35	95	0.00366667	0.002826
104	fexofenadine	1885	fexofenadine	1141146428	R06AX26	Fexofenadine	FALSE	FALSE	fexofenadine	22	2267	36	75	0.00366667	0.004534
105	irbesartan	4200	irbesartan	1141152998	C09CA04	Irbesartan	FALSE	FALSE	irbesartan	22	4665	37	46	0.00366667	0.00933
106	aprovel 75mg tablet	465	aprovel 75mg tablet	1141153006	C09CA04	Irbesartan	TRUE	FALSE	Irbesartan	22
107	cipralex 5mg tablet	456	cipralex 5mg tablet	1141190158	N06AB10	Escitalopram	TRUE	FALSE	Escitalopram	22
108	telfast 30 tablet	382	telfast 30 tablet	1141194386	R06AX26	Fexofenadine	TRUE	FALSE	Fexofenadine	22
109	hydrochlorothiazide	57	hydrochlorothiazide	1140866162	C03AA03	Hydrochlorothiazide	FALSE	FALSE	hydrochlorothiazide	21	57	38	209	0.0035	0.000114
110	enalapril	4126	enalapril	1140888552	C09AA02	Enalapril	FALSE	FALSE	enalapril	20	4143	39	50	0.00333333	0.008286
111	roaccutane 5mg capsule	20	roaccutane 5mg capsule	1140880240	D10AD04	Isotretinoin	FALSE	FALSE	Isotretinoin	20	37	40	217	0.00333333	7.4e-05
112	innovace 2.5mg tablet	17	innovace 2.5mg tablet	1140860776	C09AA02	Enalapril	TRUE	FALSE	Enalapril	20
113	isotretinoin	17	isotretinoin	1140880238	D10AD04 |D10BA01	Isotretinoin	TRUE	FALSE	isotretinoin	20
114	diclofenac	10708	diclofenac	1140884488	D11AX18 |M01AB05 |M02AA15 |S01BC03	Diclofenac	FALSE	FALSE	diclofenac	18	12859	41	19	0.003	0.025718
115	pioglitazone	1201	pioglitazone	1141171646	A10BG03	Pioglitazone	FALSE	FALSE	pioglitazone	18	1293	42	97	0.003	0.002586
116	zinc product	3546	zinc product	1140888538	A12CB	Zinc	FALSE	FALSE	Zinc	18	3546	43	57	0.003	0.007092
117	dicloflex 25mg e/c tablet	609	dicloflex 25mg e/c tablet	1140921828	M01AB05	Diclofenac	TRUE	FALSE	Diclofenac	18
118	voltarol 25mg e/c tablet	563	voltarol 25mg e/c tablet	1140871168	M01AB05	Diclofenac	TRUE	FALSE	Diclofenac	18
119	voltarol emulgel	323	voltarol emulgel	1140877892	M02AA15	Diclofenac	TRUE	FALSE	Diclofenac	18
120	solaraze 3% gel	97	solaraze 3% gel	1141174424	D11AX18	Diclofenac	TRUE	FALSE	Diclofenac	18
121	diclomax sr 75mg m/r capsule	96	diclomax sr 75mg m/r capsule	1140917394	M01AB05	Diclofenac	TRUE	FALSE	Diclofenac	18
122	rhumalgan 25mg e/c tablet	95	rhumalgan 25mg e/c tablet	1140871180	M01AB05	Diclofenac	TRUE	FALSE	Diclofenac	18
123	volsaid retard 75mg m/r tablet	92	volsaid retard 75mg m/r tablet	1140923920	M01AB05	Diclofenac	TRUE	FALSE	Diclofenac	18
124	actos 15mg tablet	92	actos 15mg tablet	1141171652	A10BG03	Pioglitazone	TRUE	FALSE	Pioglitazone	18
125	motifene 75mg e/c+m/r capsule	89	motifene 75mg e/c+m/r capsule	1140909354	M01AB05	Diclofenac	TRUE	FALSE	Diclofenac	18
126	voltaren retard 100mg m/r tablet	74	voltaren retard 100mg m/r tablet	1140877872	M01AB05	Diclofenac	TRUE	FALSE	Diclofenac	18
127	fenactol 25mg e/c tablet	38	fenactol 25mg e/c tablet	1141182674	M01AB05	Diclofenac	TRUE	FALSE	Diclofenac	18
128	voltarol 100mg suppository	33	voltarol 100mg suppository	1140871174	M01AB05	Diclofenac	TRUE	FALSE	Diclofenac	18
129	voltarene 25mg e/c tablet	20	voltarene 25mg e/c tablet	1140877868	M02AA15	Diclofenac	TRUE	FALSE	Diclofenac	18
130	rheumatac retard 75mg m/r tablet	12	rheumatac retard 75mg m/r tablet	1141167426	M01AB05	Diclofenac	TRUE	FALSE	Diclofenac	18
131	voltarene lp 100mg m/r tablet	10	voltarene lp 100mg m/r tablet	1140877874	M01AB05	Diclofenac	TRUE	FALSE	Diclofenac	18
132	montelukast product	1141	montelukast product	1141157126	R03DC03	Montelukast	FALSE	FALSE	Montelukast	16	1526	44	91	0.00266667	0.003052
133	singulair 10mg tablet	385	singulair 10mg tablet	1141157132	R03DC03	Montelukast	TRUE	FALSE	Montelukast	16
134	allopurinol	6617	allopurinol	1140875408	M04AA01	Allopurinol	FALSE	FALSE	allopurinol	14	6617	45	32	0.00233333	0.013234
135	cetirizine	6481	cetirizine	1140883504	R06AE07	Cetirizine	FALSE	FALSE	cetirizine	14	7109	46	26	0.00233333	0.014218
136	desloratadine	695	desloratadine	1141172924	R06AX27	Desloratadine	FALSE	FALSE	desloratadine	14	1293	47	98	0.00233333	0.002586
137	orlistat	608	orlistat	1141168680	A08AB01	Orlistat	FALSE	FALSE	orlistat	14	1088	48	109	0.00233333	0.002176
138	serevent 25mcg inhaler	1381	serevent 25mcg inhaler	1140862148	R03AC12	Salmeterol	FALSE	FALSE	Salmeterol	14	3024	49	63	0.00233333	0.006048
139	simvastatin	64358	simvastatin	1140861958	C10AA01	Simvastatin	FALSE	FALSE	simvastatin	14	65105	50	4	0.00233333	0.13021
140	tamsulosin	5737	tamsulosin	1140926934	G04CA02	Tamsulosin	FALSE	FALSE	tamsulosin	14	5961	51	36	0.00233333	0.011922
141	warfarin	5682	warfarin	1140888266	B01AA03	Warfarin	FALSE	FALSE	warfarin	14	6120	52	35	0.00233333	0.01224
142	salmeterol	1335	salmeterol	1140862144	R03AC12	Salmeterol	TRUE	FALSE	salmeterol	14
143	simvador 10mg tablet	692	simvador 10mg tablet	1141188146	C10AA01	Simvastatin	TRUE	FALSE	Simvastatin	14
144	neoclarityn 5mg tablet	598	neoclarityn 5mg tablet	1141172928	R06AX27	Desloratadine	TRUE	FALSE	Desloratadine	14
145	xenical 120mg capsule	480	xenical 120mg capsule	1141168684	A08AB01	Orlistat	TRUE	FALSE	Orlistat	14
146	sodium warfarin	422	sodium warfarin	1140910832	B01AA03	Warfarin	TRUE	FALSE	Warfarin	14
147	salmeterol product	308	salmeterol product	1141157264	R03AC12	Salmeterol	TRUE	FALSE	Salmeterol	14
148	flomax mr 400micrograms m/r capsule	224	flomax mr 400micrograms m/r capsule	1140926940	G04CA02	Tamsulosin	TRUE	FALSE	Tamsulosin	14
149	zirtek allergy 10mg tablet	147	zirtek allergy 10mg tablet	1141180662	R06AE07	Cetirizine	TRUE	FALSE	Cetirizine	14
150	care cetirizine hayfever relief 10mg tablet	139	care cetirizine hayfever relief 10mg tablet	1141187230	R06AE07	Cetirizine	TRUE	FALSE	Cetirizine	14
151	zirtek 10mg tablet	139	zirtek 10mg tablet	1140862770	R06AE07	Cetirizine	TRUE	FALSE	Cetirizine	14
152	piriteze 10mg tablet	103	piriteze 10mg tablet	1141179830	R06AE07	Cetirizine	TRUE	FALSE	Cetirizine	14
153	benadryl one a day 10mg tablet	59	benadryl one a day 10mg tablet	1141181562	R06AE07	Cetirizine	TRUE	FALSE	Cetirizine	14
154	zocor 10mg tablet	55	zocor 10mg tablet	1140881748	C10AA01	Simvastatin	TRUE	FALSE	Simvastatin	14
155	galpharm hayfever and allergy relief 10mg tablet	26	galpharm hayfever and allergy relief 10mg tablet	1141179944	R06AE07	Cetirizine	TRUE	FALSE	Cetirizine	14
156	marevan 0.5mg tablet	16	marevan 0.5mg tablet	1141164760	B01AA03	Warfarin	TRUE	FALSE	Warfarin	14
157	numark hayfever and allergy relief 10mg tablet	15	numark hayfever and allergy relief 10mg tablet	1141194228	R06AE07	Cetirizine	TRUE	FALSE	Cetirizine	14
158	metoprolol	1025	metoprolol	1140879818	C07AB02	Metoprolol	FALSE	FALSE	metoprolol	12	1025	53	111	0.002	0.00205
159	topiramate	320	topiramate	1140923484	N03AX11	Topiramate	FALSE	FALSE	topiramate	12	390	54	142	0.002	0.00078
160	topamax 25mg tablet	70	topamax 25mg tablet	1140927692	N03AX11	Topiramate	TRUE	FALSE	Topiramate	12
161	glucosamine product	34219	glucosamine product	1141188442	M01AX05	Glucosamine	FALSE	FALSE	glucosamine	11	34219	55	6	0.00183333	0.068438
162	vitamin b12 preparation	1781	vitamin b12 preparation	1140870570	B03BA	Cyanocobalamin	FALSE	FALSE	Cyanocobalamin	10	2377	56	74	0.00166667	0.004754
163	fosinopril	239	fosinopril	1140888556	C09AA09	Fosinopril	FALSE	FALSE	fosinopril	10	239	57	164	0.00166667	0.000478
164	levetiracetam	240	levetiracetam	1141171932	N03AX14	Levetiracetam	FALSE	FALSE	levetiracetam	10	395	58	140	0.00166667	0.00079
165	mesalazine	781	mesalazine	1140865578	A07EC02	Mesalazine	FALSE	FALSE	mesalazine	10	2181	59	77	0.00166667	0.004362
166	nasonex 0.05% aqueous nasal spray	2655	nasonex 0.05% aqueous nasal spray	1141150944	R01AD09	Mometasone	FALSE	FALSE	Mometasone	10	4697	60	44	0.00166667	0.009394
167	mometasone	1141	mometasone	1140888172	D07AC13 |D07XC03 |R01AD09 |R03BA07	Mometasone	TRUE	FALSE	mometasone	10
168	asacol 400mg e/c tablet	781	asacol 400mg e/c tablet	1140865580	A07EC02	Mesalazine	TRUE	FALSE	Mesalazine	10
169	pentasa sr 250mg m/r tablet	348	pentasa sr 250mg m/r tablet	1140865588	A07EC02	Mesalazine	TRUE	FALSE	Mesalazine	10
170	elocon cream	347	elocon cream	1140888092	D07AC13	Mometasone	TRUE	FALSE	Mometasone	10
171	respiratory mometasone	327	respiratory mometasone	1141191748	R01AD09 |R03BA07	Mometasone	TRUE	FALSE	Mometasone	10
172	hepacon b12 1mg/1ml injection	269	hepacon b12 1mg/1ml injection	1140858452	B03BA01	Cyanocobalamin	TRUE	FALSE	Cyanocobalamin	10
173	asacol mr 400mg e/c tablet	206	asacol mr 400mg e/c tablet	1141188658	A07EC02	Mesalazine	TRUE	FALSE	Mesalazine	10
174	keppra 250mg tablet	155	keppra 250mg tablet	1141171940	N03AX14	Levetiracetam	TRUE	FALSE	Levetiracetam	10
175	cyanocobalamin product	150	cyanocobalamin product	1140870512	B03BA01	Cyanocobalamin	TRUE	FALSE	Cyanocobalamin	10
176	b12 - cyanocobalamin prep	142	b12 - cyanocobalamin prep	1140912228	B03BA01	Cyanocobalamin	TRUE	FALSE	Cyanocobalamin	10
177	mometasone furoate 0.1% ointment	119	mometasone furoate 0.1% ointment	1140888176	D07AC13	Mometasone	TRUE	FALSE	Mometasone	10
178	mometasone furoate 0.1% lotion	88	mometasone furoate 0.1% lotion	1140888184	D07AC13	Mometasone	TRUE	FALSE	Mometasone	10
179	cytamen 1mg/1ml injection	35	cytamen 1mg/1ml injection	1140870520	B03BA01	Cyanocobalamin	TRUE	FALSE	Cyanocobalamin	10
180	mesren mr 400mg m/r tablet	32	mesren mr 400mg m/r tablet	1141189390	A07EC02	Mesalazine	TRUE	FALSE	Mesalazine	10
181	salofalk 250mg e/c tablet	23	salofalk 250mg e/c tablet	1140865598	A07EC02	Mesalazine	TRUE	FALSE	Mesalazine	10
182	asmanex twisthaler 200mcg breath-actuated dry powder inhaler	20	asmanex twisthaler 200mcg breath-actuated dry powder inhaler	1141191818	R03BA07	Mometasone	TRUE	FALSE	Mometasone	10
183	5asa - mesalazine	10	5asa - mesalazine	1140910598	A07EC02	Mesalazine	TRUE	FALSE	Mesalazine	10
184	azathioprine	1163	azathioprine	1140869930	L04AX01	Azathioprine	FALSE	FALSE	azathioprine	9	1204	61	102	0.0015	0.002408
185	duphaston 10mg tablet	34	duphaston 10mg tablet	1140868496	G03DB01	Dydrogesterone	FALSE	FALSE	Dydrogesterone	9	63	62	205	0.0015	0.000126
186	mebeverine	2697	mebeverine	1140879428	A03AA04	Mebeverine	FALSE	FALSE	mebeverine	9	3327	63	58	0.0015	0.006654
187	pravastatin	3126	pravastatin	1140888648	C10AA03	Pravastatin	FALSE	FALSE	pravastatin	9	3159	64	60	0.0015	0.006318
188	pregabalin	1330	pregabalin	1141200004	N03AX16	Pregabalin	FALSE	FALSE	pregabalin	9	1500	65	93	0.0015	0.003
189	colofac-100 tablet	630	colofac-100 tablet	1141167334	A03AA04	Mebeverine	TRUE	FALSE	Mebeverine	9
190	lyrica 25mg capsule	170	lyrica 25mg capsule	1141200072	N03AX16	Pregabalin	TRUE	FALSE	Pregabalin	9
191	lipostat 10mg tablet	33	lipostat 10mg tablet	1140861970	C10AA03	Pravastatin	TRUE	FALSE	Pravastatin	9
192	dydrogesterone	29	dydrogesterone	1140868494	G03DB01	Dydrogesterone	TRUE	FALSE	dydrogesterone	9
193	imuran 10mg tablet	22	imuran 10mg tablet	1141145996	L04AX01	Azathioprine	TRUE	FALSE	Azathioprine	9
194	azt - azathioprine	19	azt - azathioprine	1140909864	L04AX01	Azathioprine	TRUE	FALSE	Azathioprine	9
195	betahistine	1658	betahistine	1140888688	N07CA01	Betahistine	FALSE	FALSE	betahistine	8	1807	66	80	0.00133333	0.003614
196	meloxicam	1482	meloxicam	1140926732	M01AC06	Meloxicam	FALSE	FALSE	meloxicam	8	1555	67	90	0.00133333	0.00311
197	serc-8 tablet	149	serc-8 tablet	1140868064	N07CA01	Betahistine	TRUE	FALSE	Betahistine	8
198	mobic 15mg tablet	42	mobic 15mg tablet	1140926796	M01AC06	Meloxicam	TRUE	FALSE	Meloxicam	8
199	mobic 7.5mg tablet	31	mobic 7.5mg tablet	1140926794	M01AC06	Meloxicam	TRUE	FALSE	Meloxicam	8
200	carvedilol	406	carvedilol	1140909368	C07AG02	Carvedilol	FALSE	FALSE	carvedilol	7	406	68	139	0.00116667	0.000812
201	ezetimibe	3217	ezetimibe	1141192736	C10AX09	Ezetimibe	FALSE	FALSE	ezetimibe	7	4219	69	49	0.00116667	0.008438
202	furosemide	4082	furosemide	1140909708	C03CA01	Furosemide	FALSE	FALSE	furosemide	7	5012	70	42	0.00116667	0.010024
203	gabapentin	2760	gabapentin	1140872228	N03AX12	Gabapentin	FALSE	FALSE	gabapentin	7	2811	71	65	0.00116667	0.005622
204	prednisolone	3266	prednisolone	1140874930	A07EA01 |C05AA04 |D07AA03 |D07XA02 |H02AB06 |R01AD02 |S01BA04 |S01CB02 |S02BA03 |S03BA02	Prednisolone	FALSE	FALSE	prednisolone	7	3754	72	55	0.00116667	0.007508
205	ezetrol 10mg tablet	1002	ezetrol 10mg tablet	1141192740	C10AX09	Ezetimibe	TRUE	FALSE	Ezetimibe	7
206	frusemide	930	frusemide	1140866116	C03CA01	Furosemide	TRUE	FALSE	Furosemide	7
207	prednisolone product	204	prednisolone product	1141157402	A07EA01 |C05AA04 |D07AA03 |D07XA02 |H02AB06 |R01AD02 |S01BA04 |S01CB02 |S02BA03 |S03BA02	Prednisolone	TRUE	FALSE	Prednisolone	7
208	pred forte 1% eye drops	82	pred forte 1% eye drops	1140883030	S01BA04	Prednisolone	TRUE	FALSE	Prednisolone	7
209	predsol 0.5% eye/ear drops	59	predsol 0.5% eye/ear drops	1140883028	S01BA04	Prednisolone	TRUE	FALSE	Prednisolone	7
210	minims prednisolone 0.5% single-use eye drops	57	minims prednisolone 0.5% single-use eye drops	1140875684	S01BA04	Prednisolone	TRUE	FALSE	Prednisolone	7
211	predfoam 20mg enema	57	predfoam 20mg enema	1140865840	A07EA	Prednisolone	TRUE	FALSE	Prednisolone	7
212	neurontin 100mg capsule	51	neurontin 100mg capsule	1140872236	N03AX12	Gabapentin	TRUE	FALSE	Gabapentin	7
213	prednesol 5mg tablet	29	prednesol 5mg tablet	1140874950	H02AB06	Prednisolone	TRUE	FALSE	Prednisolone	7
214	cortisone	82	cortisone	1141173346	H02AB10 |S01BA03	Cortisone Acetate	FALSE	FALSE	cortisone	6	82	73	194	0.001	0.000164
215	domperidone	1100	domperidone	1140879430	A03FA03	Domperidone	FALSE	FALSE	domperidone	6	1259	74	99	0.001	0.002518
216	fluoxetine	6292	fluoxetine	1140879540	N06AB03	Fluoxetine	FALSE	FALSE	fluoxetine	6	7011	75	28	0.001	0.014022
217	formoterol	166	formoterol	1141195224	R03AC13	Formoterol	FALSE	FALSE	formoterol	6	285	76	154	0.001	0.00057
218	levocetirizine	317	levocetirizine	1141184748	R06AE09	Levocetirizine	FALSE	FALSE	levocetirizine	6	393	77	141	0.001	0.000786
219	nifedipine	1306	nifedipine	1140861088	C08CA05	Nifedipine	FALSE	FALSE	nifedipine	6	3718	78	56	0.001	0.007436
220	vitamin a	189	vitamin a	1140852756	A11CA01 |D10AD02 |S01XA02 |R01AX02	Vitamin A	FALSE	FALSE	vitamin a	6	277	79	156	0.001	0.000554
221	adalat 5mg capsule	1264	adalat 5mg capsule	1140861090	C08CA05	Nifedipine	TRUE	FALSE	Nifedipine	6
222	prozac 20mg capsule	694	prozac 20mg capsule	1140867876	N06AB03	Fluoxetine	TRUE	FALSE	Fluoxetine	6
223	coracten sr 10mg m/r capsule	459	coracten sr 10mg m/r capsule	1140861120	C08CA05	Nifedipine	TRUE	FALSE	Nifedipine	6
224	adalate 10mg capsule	444	adalate 10mg capsule	1140881702	C08CA05	Nifedipine	TRUE	FALSE	Nifedipine	6
225	adipine mr 10 m/r tablet	180	adipine mr 10 m/r tablet	1140923572	C08CA05	Nifedipine	TRUE	FALSE	Nifedipine	6
226	motilium 10mg tablet	159	motilium 10mg tablet	1140867998	A03FA03	Domperidone	TRUE	FALSE	Domperidone	6
227	oxis 6micrograms turbohaler	108	oxis 6micrograms turbohaler	1141153236	R03AC13	Formoterol	TRUE	FALSE	Formoterol	6
228	xyzal 5mg tablet	76	xyzal 5mg tablet	1141184752	R06AE09	Levocetirizine	TRUE	FALSE	Levocetirizine	6
229	vitamin a product	76	vitamin a product	1140870852	A11CA	Vitamin A	TRUE	FALSE	Vitamin A	6
230	oxactin 20mg capsule	25	oxactin 20mg capsule	1141174756	N06AB03	Fluoxetine	TRUE	FALSE	Fluoxetine	6
231	fortipine la40 m/r tablet	24	fortipine la40 m/r tablet	1141145870	C08CA05	Nifedipine	TRUE	FALSE	Nifedipine	6
232	nifedipress mr 10 m/r tablet	23	nifedipress mr 10 m/r tablet	1141157140	C08CA05	Nifedipine	TRUE	FALSE	Nifedipine	6
233	tensipine mr 10 m/r tablet	18	tensipine mr 10 m/r tablet	1140927940	C08CA05	Nifedipine	TRUE	FALSE	Nifedipine	6
234	retinol product	12	retinol product	1140909870	A11CA01 |S01XA02 |R01AX02 |D10AD02	Vitamin A	TRUE	FALSE	Vitamin A	6
235	eformoterol	11	eformoterol	1140923696	R03AC13	Formoterol	TRUE	FALSE	Formoterol	6
236	alfuzosin	1317	alfuzosin	1140879774	G04CA01	Alfuzosin	FALSE	FALSE	alfuzosin	5	1500	80	94	0.000833333	0.003
237	budesonide	1144	budesonide	1140862572	A07EA06 |D07AC09 |R01AD05 |R03BA02	Budesonide	FALSE	FALSE	budesonide	5	2467	81	71	0.000833333	0.004934
238	tegretol 100mg tablet	1157	tegretol 100mg tablet	1140872072	N03AF01	Carbamazepine	FALSE	FALSE	Carbamazepine	5	2021	82	78	0.000833333	0.004042
239	fenofibrate	774	fenofibrate	1140861954	C10AB05	Fenofibrate	FALSE	FALSE	fenofibrate	5	949	83	114	0.000833333	0.001898
240	garlic product	6748						FALSE	garlic	5	6748	84	30	0.000833333	0.013496
241	hydroxyzine	178	hydroxyzine	1140883656	N05BB01	Hydroxyzine	FALSE	FALSE	hydroxyzine	5	290	85	153	0.000833333	0.00058
242	ibuprofen	67388	ibuprofen	1140871310	C01EB16 |G02CC01 |M01AE01 |M02AA13 |R02AX02	Ibuprofen	FALSE	FALSE	ibuprofen	5	68193	86	3	0.000833333	0.136386
243	isosorbide dinitrate	118	isosorbide dinitrate	1140861008	C01DA08 |C05AE02	Isosorbide Dinitrate	FALSE	FALSE	isosorbide dinitrate	5	118	87	184	0.000833333	0.000236
244	loratadine	4121	loratadine	1140862772	R06AX13	Loratadine	FALSE	FALSE	loratadine	5	4680	88	45	0.000833333	0.00936
245	minerals - magnesium	1193	minerals - magnesium	1141145812	A12CC	Magnesium	FALSE	FALSE	Magnesium	5	1193	89	104	0.000833333	0.002386
246	methotrexate	3058						FALSE	methotrexate	5	3107	90	61	0.000833333	0.006214
247	paroxetine	1762	paroxetine	1140867888	N06AB05	Paroxetine	FALSE	FALSE	paroxetine	5	2445	91	72	0.000833333	0.00489
248	propranolol	3738	propranolol	1140879842	C07AA05	Propranolol	FALSE	FALSE	propranolol	5	4135	92	51	0.000833333	0.00827
249	timolol	431	timolol	1140879866	C07AA06 |S01ED01	Timolol	FALSE	FALSE	timolol	5	1185	93	105	0.000833333	0.00237
250	epilim 100mg crushable tablet	881	epilim 100mg crushable tablet	1140872200	N03AG01	Valproic Acid	FALSE	FALSE	Valproic Acid	5	1633	94	85	0.000833333	0.003266
251	venlafaxine	2231	venlafaxine	1140916282	N06AX16	Venlafaxine	FALSE	FALSE	venlafaxine	5	2480	95	70	0.000833333	0.00496
252	zolmitriptan	495	zolmitriptan	1141150620	N02CC03	Zolmitriptan	FALSE	FALSE	zolmitriptan	5	977	96	113	0.000833333	0.001954
253	carbamazepine	822	carbamazepine	2038459704	N03AF01	Carbamazepine	TRUE	FALSE	carbamazepine	5
254	pulmicort ls 50micrograms inhaler	811	pulmicort ls 50micrograms inhaler	1140862574	R03BA02	Budesonide	TRUE	FALSE	Budesonide	5
255	seroxat 20mg tablet	683	seroxat 20mg tablet	1140882236	N06AB05	Paroxetine	TRUE	FALSE	Paroxetine	5
256	sodium valproate	540	sodium valproate	1140872198	N03AG01	Valproic Acid	TRUE	FALSE	Valproic Acid	5
257	zomig 2.5mg tablet	482	zomig 2.5mg tablet	1141150624	N02CC03	Zolmitriptan	TRUE	FALSE	Zolmitriptan	5
258	clarityn 10mg tablet	443	clarityn 10mg tablet	1140862776	R06AX13	Loratadine	TRUE	FALSE	Loratadine	5
259	timolol 0.25% eye drops	415	timolol 0.25% eye drops	1140875840	S01ED01	Timolol	TRUE	FALSE	Timolol	5
260	timoptol 0.25% eye drops	312	timoptol 0.25% eye drops	1140881882	S01ED01	Timolol	TRUE	FALSE	Timolol	5
261	nurofen 200mg tablet	308	nurofen 200mg tablet	1141187776	M01AE01	Ibuprofen	TRUE	FALSE	Ibuprofen	5
262	efexor 37.5mg tablet	249	efexor 37.5mg tablet	1140916288	N06AX16	Venlafaxine	TRUE	FALSE	Venlafaxine	5
263	rhinocort 50micrograms nasal spray	194	rhinocort 50micrograms nasal spray	1140876146	R01AD05	Budesonide	TRUE	FALSE	Budesonide	5
264	xatral 2.5mg tablet	183	xatral 2.5mg tablet	1140864472	G04CA01	Alfuzosin	TRUE	FALSE	Alfuzosin	5
265	half-inderal la 80mg m/r capsule	182	half-inderal la 80mg m/r capsule	1140866800	C07AA05	Propranolol	TRUE	FALSE	Propranolol	5
266	depakote 250mg e/c tablet	153	depakote 250mg e/c tablet	1141172838	N05AX	Valproic Acid	TRUE	FALSE	Valproic Acid	5
267	budesonide product	152	budesonide product	1141157418	A07EA06 |D07AC09 |R01AD05 |R03BA02	Budesonide	TRUE	FALSE	Budesonide	5
268	inderal 10mg tablet	129	inderal 10mg tablet	1140866804	C07AA05	Propranolol	TRUE	FALSE	Propranolol	5
269	loratadine product	116	loratadine product	1141157324	R06AX13	Loratadine	TRUE	FALSE	Loratadine	5
270	ibuprofen product	107	ibuprofen product	1141157412	C01EB16 |G02CC01 |M01AE01 |M02AA13 |R02AX02	Ibuprofen	TRUE	FALSE	Ibuprofen	5
271	lipantil micro 67mg capsule	103	lipantil micro 67mg capsule	1141162544	C10AB05	Fenofibrate	TRUE	FALSE	Fenofibrate	5
272	brufen 200mg tablet	87	brufen 200mg tablet	1140871374	C01EB16 |M01AE01 |R02AX02	Ibuprofen	TRUE	FALSE	Ibuprofen	5
273	pulmicort ls 50micrograms spacer inhaler	75	pulmicort ls 50micrograms spacer inhaler	1140862584	R01AD05	Budesonide	TRUE	FALSE	Budesonide	5
274	novolizer budesonide 200micrograms/dose cartridge+inhaler	74	novolizer budesonide 200micrograms/dose cartridge+inhaler	1141195280	R03BA02	Budesonide	TRUE	FALSE	Budesonide	5
275	supralip 160mg m/r tablet	72	supralip 160mg m/r tablet	1141172214	C10AB05	Fenofibrate	TRUE	FALSE	Fenofibrate	5
276	atarax 10mg tablet	69	atarax 10mg tablet	1140863286	N05BB01	Hydroxyzine	TRUE	FALSE	Hydroxyzine	5
277	bedranol 10mg tablet	64	bedranol 10mg tablet	1140851556	C07AA05	Propranolol	TRUE	FALSE	Propranolol	5
278	valproic acid	59	valproic acid	1140872214	N03AG01	Valproic Acid	TRUE	FALSE	valproic acid	5
279	care ibuprofen 10% gel	58	care ibuprofen 10% gel	1141200748	M02AA13	Ibuprofen	TRUE	FALSE	Ibuprofen	5
280	ibugel gel	58	ibugel gel	1140875616	M02AA13	Ibuprofen	TRUE	FALSE	Ibuprofen	5
281	cuprofen 200mg tablet	50	cuprofen 200mg tablet	1140871388	M01AE01	Ibuprofen	TRUE	FALSE	Ibuprofen	5
282	ibuleve gel	50	ibuleve gel	1140875540	M02AA13	Ibuprofen	TRUE	FALSE	Ibuprofen	5
283	mtx - methotrexate	49	mtx - methotrexate	1140910036	L01BA01 |L04AX03	Methotrexate	FALSE	FALSE	Methotrexate	5
284	ucerax 25mg tablet	43	ucerax 25mg tablet	1140863292	N05BB01	Hydroxyzine	TRUE	FALSE	Hydroxyzine	5
285	carbamazepine product	42	carbamazepine product	1140872064	N03AF01	Carbamazepine	TRUE	FALSE	Carbamazepine	5
286	fenbid 5% gel	31	fenbid 5% gel	1140927152	M02AA13	Ibuprofen	TRUE	FALSE	Ibuprofen	5
287	nyogel 0.1% liquid eye gel	27	nyogel 0.1% liquid eye gel	1141179734	S01ED01	Timolol	TRUE	FALSE	Timolol	5
288	half beta-prograne 80mg m/r capsule	22	half beta-prograne 80mg m/r capsule	1140866802	C07AA05	Propranolol	TRUE	FALSE	Propranolol	5
289	phorpain 5% gel	19	phorpain 5% gel	1141188652	M02AA13	Ibuprofen	TRUE	FALSE	Ibuprofen	5
290	entocort cr 3mg m/r capsule	17	entocort cr 3mg m/r capsule	1140926004	A07EA06	Budesonide	TRUE	FALSE	Budesonide	5
291	anadin ibuprofen 200mg tablet	14	anadin ibuprofen 200mg tablet	1141153134	M01AE01	Ibuprofen	TRUE	FALSE	Ibuprofen	5
292	ibugel forte 10% gel	13	ibugel forte 10% gel	1141176278	M02AA13	Ibuprofen	TRUE	FALSE	Ibuprofen	5
293	proflex cream	10	proflex cream	1140877952	M02AA13	Ibuprofen	TRUE	FALSE	Ibuprofen	5
294	humira 40mg injection solution 0.8ml prefilled syringe	147	humira 40mg injection solution 0.8ml prefilled syringe	1141188594	L04AB04	Adalimumab	FALSE	FALSE	Adalimumab	4	208	97	169	0.000666667	0.000416
295	amoxicillin	460	amoxicillin	1141180226	J01CA04	Amoxicillin	FALSE	FALSE	amoxicillin	4	671	98	121	0.000666667	0.001342
296	dermovate cream	808	dermovate cream	1140882782	D07AD01	Clobetasol Propionate	FALSE	FALSE	Clobetasol Propionate	4	808	99	118	0.000666667	0.001616
297	cerazette 75micrograms tablet	1305	cerazette 75micrograms tablet	1141182800	G03AC09	Desogestrel	FALSE	FALSE	Desogestrel	4	1356	100	96	0.000666667	0.002712
298	finasteride	2348	finasteride	1140868550	D11AX10 |G04CB01	Finasteride	FALSE	FALSE	finasteride	4	2437	101	73	0.000666667	0.004874
299	fluticasone	2544	fluticasone	1140888098	D07AC17 |R01AD08 |R03BA05	Fluticasone Propionate	FALSE	FALSE	fluticasone	4	2544	102	69	0.000666667	0.005088
300	fluvastatin	260	fluvastatin	1140888594	C10AA04	Fluvastatin	FALSE	FALSE	fluvastatin	4	280	103	155	0.000666667	0.00056
301	glibenclamide	138	glibenclamide	1140874718	A10BB01	Glyburide	FALSE	FALSE	Glyburide	4	138	104	180	0.000666667	0.000276
302	lansoprazole	20781	lansoprazole	1140864752	A02BC03	Lansoprazole	FALSE	FALSE	lansoprazole	4	21138	105	12	0.000666667	0.042276
303	mycophenolate	261	mycophenolate	1140925978	L04AA06	Mycophenolate Mofetil	FALSE	FALSE	Mycophenolate Mofetil	4	302	106	151	0.000666667	0.000604
304	quetiapine	347	quetiapine	1141152848	N05AH04	Quetiapine	FALSE	FALSE	quetiapine	4	422	107	138	0.000666667	0.000844
305	ramipril	27363	ramipril	1140860806	C09AA05	Ramipril	FALSE	FALSE	ramipril	4	27423	108	9	0.000666667	0.054846
306	sertraline	2699	sertraline	1140867878	N06AB06	Sertraline	FALSE	FALSE	sertraline	4	2771	109	66	0.000666667	0.005542
307	telmisartan	844	telmisartan	1141166006	C09CA07	Telmisartan	FALSE	FALSE	telmisartan	4	990	110	112	0.000666667	0.00198
308	verapamil	957	verapamil	1140888510	C08DA01	Verapamil	FALSE	FALSE	verapamil	4	1201	111	103	0.000666667	0.002402
309	zoton 15mg capsule	357	zoton 15mg capsule	1140923688	A02BC03	Lansoprazole	TRUE	FALSE	Lansoprazole	4
310	micardis 20mg tablet	146	micardis 20mg tablet	1141172492	C09CA07	Telmisartan	TRUE	FALSE	Telmisartan	4
311	securon 40mg tablet	136	securon 40mg tablet	1140866466	C08DA01	Verapamil	TRUE	FALSE	Verapamil	4
312	co-amoxiclav	107	co-amoxiclav	1140882374	J01CA04	Amoxicillin	TRUE	FALSE	Amoxicillin	4
313	seroquel 25mg tablet	75	seroquel 25mg tablet	1141152860	N05AH04	Quetiapine	TRUE	FALSE	Quetiapine	4
314	lustral 50mg tablet	72	lustral 50mg tablet	1140867884	N06AB06	Sertraline	TRUE	FALSE	Sertraline	4
315	half securon sr 120mg m/r tablet	69	half securon sr 120mg m/r tablet	1140866460	C08DA01	Verapamil	TRUE	FALSE	Verapamil	4
316	proscar 5mg tablet	62	proscar 5mg tablet	1140868608	G04CB01	Finasteride	TRUE	FALSE	Finasteride	4
317	adalimumab	61	adalimumab	1141188588	L04AB04	Adalimumab	TRUE	FALSE	adalimumab	4
318	amoxycillin	55	amoxycillin	1140872646	J01CA04	Amoxicillin	TRUE	FALSE	Amoxicillin	4
319	desogestrel	51	desogestrel	1140857912	G03AC09	Desogestrel	TRUE	FALSE	desogestrel	4
320	tritace 1.25mg tablet	49	tritace 1.25mg tablet	1141188408	C09AA05	Ramipril	TRUE	FALSE	Ramipril	4
321	cellcept 250mg capsule	41	cellcept 250mg capsule	1140925986	L04AA06	Mycophenolate Mofetil	TRUE	FALSE	Mycophenolate Mofetil	4
322	amoxicillin product	27	amoxicillin product	1141180228	J01CA04	Amoxicillin	TRUE	FALSE	Amoxicillin	4
323	propecia 1mg tablet	27	propecia 1mg tablet	1141179886	D11AX10	Finasteride	TRUE	FALSE	Finasteride	4
324	univer 120mg m/r capsule	26	univer 120mg m/r capsule	1140881692	C08DA01	Verapamil	TRUE	FALSE	Verapamil	4
325	lescol 20mg capsule	20	lescol 20mg capsule	1140864592	C10AA04	Fluvastatin	TRUE	FALSE	Fluvastatin	4
326	vertab sr 240 m/r tablet	13	vertab sr 240 m/r tablet	1141169710	C08DA01	Verapamil	TRUE	FALSE	Verapamil	4
327	amoxil 500mg capsule	12	amoxil 500mg capsule	1140872710	J01CA04	Amoxicillin	TRUE	FALSE	Amoxicillin	4
328	lopace 2.5mg capsule	11	lopace 2.5mg capsule	1141199940	C09AA05	Ramipril	TRUE	FALSE	Ramipril	4
329	amoxil 250mg capsule	10	amoxil 250mg capsule	1140872708	J01CA04	Amoxicillin	TRUE	FALSE	Amoxicillin	4
330	alfacalcidol	497	alfacalcidol	1140870956	A11CC03	Alfacalcidol	FALSE	FALSE	alfacalcidol	3	552	112	130	0.0005	0.001104
331	amitriptyline	10530	amitriptyline	1140879616	N06AA09	Amitriptyline	FALSE	FALSE	amitriptyline	3	10530	113	20	0.0005	0.02106
332	betnovate cream	1816	betnovate cream	1140882694	D07AC01	Betamethasone	FALSE	FALSE	Betamethasone	3	3009	114	64	0.0005	0.006018
333	bisacodyl	240	bisacodyl	1140865786	A06AB02 |A06AG02	Bisacodyl	FALSE	FALSE	bisacodyl	3	331	115	148	0.0005	0.000662
334	cabergoline	129	cabergoline	1140864566	G02CB03 |N04BC06	Cabergoline	FALSE	FALSE	cabergoline	3	141	116	179	0.0005	0.000282
335	candesartan cilexetil	6518	candesartan cilexetil	1141156836	C09CA06	Candesartan	FALSE	FALSE	candesartan	3	7097	117	27	0.0005	0.014194
336	clomifene	3						FALSE	clomifene	3	3	118	235	0.0005	6e-06
337	diltiazem	1130	diltiazem	1140879806	C05AE03 |C08DB01	Diltiazem	FALSE	FALSE	diltiazem	3	3872	119	53	0.0005	0.007744
338	doxycycline	526	doxycycline	1140873394	J01AA02 |A01AB22	Doxycycline	FALSE	FALSE	doxycycline	3	526	120	132	0.0005	0.001052
339	duloxetine	511	duloxetine	1141200564	N06AX21	Duloxetine	FALSE	FALSE	duloxetine	3	591	121	127	0.0005	0.001182
340	dutasteride	445	dutasteride	1141192000	G04CB02	Dutasteride	FALSE	FALSE	dutasteride	3	565	122	129	0.0005	0.00113
341	hydralazine	56	hydralazine	1140888686	C02DB02	Hydralazine	FALSE	FALSE	hydralazine	3	56	123	210	0.0005	0.000112
342	hydroxychloroquine	894	hydroxychloroquine	1140884308	P01BA02	Hydroxychloroquine	FALSE	FALSE	hydroxychloroquine	3	1114	124	108	0.0005	0.002228
343	moxonidine	479	moxonidine	1140928284	C02AC05	Moxonidine	FALSE	FALSE	moxonidine	3	502	125	133	0.0005	0.001004
344	naproxen	4048	naproxen	1140871462	G02CC02 |M01AE02 |M02AA12	Naproxen	FALSE	FALSE	naproxen	3	4413	126	47	0.0005	0.008826
345	piperazine	0						FALSE	piperazine	3	0	127	240	0.0005	0
346	slow-k 600mg m/r tablet	68	slow-k 600mg m/r tablet	1140870556	A12BA01	Potassium Chloride	FALSE	FALSE	Potassium Chloride	3	68	128	203	0.0005	0.000136
347	repaglinide	91	repaglinide	1141168660	A10BX02	Repaglinide	FALSE	FALSE	repaglinide	3	91	129	191	0.0005	0.000182
348	spironolactone	1052	spironolactone	1140866236	C03DA01	Spironolactone	FALSE	FALSE	spironolactone	3	1069	130	110	0.0005	0.002138
349	tadalafil	712	tadalafil	1141187810	G04BE08	Tadalafil	FALSE	FALSE	tadalafil	3	1243	131	101	0.0005	0.002486
350	tildiem 60mg m/r tablet	1063	tildiem 60mg m/r tablet	1140861128	C08DB01	Diltiazem	TRUE	FALSE	Diltiazem	3
351	betamethasone	868	betamethasone	1140874790	A07EA04 |C05AA05 |D07AC01 |D07XC01 |H02AB01 |R01AD06 |R03BA04 |S01BA06 |S01CB04 |S02BA07 |S03BA03	Betamethasone	TRUE	FALSE	betamethasone	3
352	amias 2mg tablet	579	amias 2mg tablet	1141156846	C09CA06	Candesartan	TRUE	FALSE	Candesartan	3
353	adizem-60 m/r tablet	520	adizem-60 m/r tablet	1140861138	C08DB01	Diltiazem	TRUE	FALSE	Diltiazem	3
354	adizem-xl plus m/r capsule	397	adizem-xl plus m/r capsule	1140926780	C08DB01	Diltiazem	TRUE	FALSE	Diltiazem	3
355	naprosyn 250mg tablet	365	naprosyn 250mg tablet	1140871472	M01AE02	Naproxen	TRUE	FALSE	Naproxen	3
356	cialis 10mg tablet	329	cialis 10mg tablet	1141187814	G04BE08	Tadalafil	TRUE	FALSE	Tadalafil	3
357	dilzem sr 60mg long acting m/r capsule	228	dilzem sr 60mg long acting m/r capsule	1140861166	C08DB01	Diltiazem	TRUE	FALSE	Diltiazem	3
358	plaquenil 200mg tablet	220	plaquenil 200mg tablet	1140875392	P01BA02	Hydroxychloroquine	TRUE	FALSE	Hydroxychloroquine	3
359	cialis 20mg tablet	202	cialis 20mg tablet	1141187818	G04BE08	Tadalafil	TRUE	FALSE	Tadalafil	3
360	slozem 120mg m/r capsule	185	slozem 120mg m/r capsule	1140911698	C08DB01	Diltiazem	TRUE	FALSE	Diltiazem	3
361	angitil sr 90 m/r capsule	181	angitil sr 90 m/r capsule	1140917428	C08DB01	Diltiazem	TRUE	FALSE	Diltiazem	3
362	betnesol 0.1% eye/ear/nose drops	155	betnesol 0.1% eye/ear/nose drops	1140882626	S01BA06 |S02BA07 |S03BA03	Betamethasone	TRUE	FALSE	Betamethasone	3
363	avodart 500micrograms capsule	120	avodart 500micrograms capsule	1141192004	G04CB02	Dutasteride	TRUE	FALSE	Dutasteride	3
364	viazem xl 120mg m/r capsule	100	viazem xl 120mg m/r capsule	1141151474	C08DB01	Diltiazem	TRUE	FALSE	Diltiazem	3
365	dulco-lax 5mg e/c tablet	91	dulco-lax 5mg e/c tablet	1140865686	A06AB02	Bisacodyl	TRUE	FALSE	Bisacodyl	3
366	betacap scalp application	64	betacap scalp application	1140921024	D07AC01	Betamethasone	TRUE	FALSE	Betamethasone	3
367	one-alpha 250nanograms capsule	55	one-alpha 250nanograms capsule	1140870958	A11CC03	Alfacalcidol	TRUE	FALSE	Alfacalcidol	3
368	betnesol 500mcg soluble tablet	52	betnesol 500mcg soluble tablet	1140874794	H02AB01	Betamethasone	TRUE	FALSE	Betamethasone	3
369	zemtard 120 xl m/r capsule	49	zemtard 120 xl m/r capsule	1141167832	C08DB01	Diltiazem	TRUE	FALSE	Diltiazem	3
370	cymbalta 30mg gastro-resistant capsule	48	cymbalta 30mg gastro-resistant capsule	1141201834	N06AX21	Duloxetine	TRUE	FALSE	Duloxetine	3
371	diprosone cream	44	diprosone cream	1140882630	D07AC01	Betamethasone	TRUE	FALSE	Betamethasone	3
372	yentreve 20mg gastro-resistant capsule	32	yentreve 20mg gastro-resistant capsule	1141200570	N06AX21	Duloxetine	TRUE	FALSE	Duloxetine	3
373	physiotens 200micrograms tablet	23	physiotens 200micrograms tablet	1140928290	C02AC05	Moxonidine	TRUE	FALSE	Moxonidine	3
374	calcicard 60mg tablet	19	calcicard 60mg tablet	1140851730	C08DB01	Diltiazem	TRUE	FALSE	Diltiazem	3
375	spirolone 25mg tablet	17	spirolone 25mg tablet	1140866318	C03DA01	Spironolactone	TRUE	FALSE	Spironolactone	3
376	dostinex 500micrograms tablet	12	dostinex 500micrograms tablet	1140864570	G02CB03	Cabergoline	TRUE	FALSE	Cabergoline	3
377	bettamousse 0.12% foam	10	bettamousse 0.12% foam	1140926988	D07AC01	Betamethasone	TRUE	FALSE	Betamethasone	3
378	alendronate sodium	6545	alendronate sodium	1140922174	M05BA04	Alendronic Acid	FALSE	FALSE	alendronic acid	2	7198	132	25	0.000333333	0.014396
379	spasmonal 60mg capsule	335	spasmonal 60mg capsule	1140865336	A03AX08	Alverine	FALSE	FALSE	Alverine	2	675	133	120	0.000333333	0.00135
380	azelastine	100	azelastine	1140883500	R01AC03 |R06AX19 |S01GX07	Azelastine	FALSE	FALSE	azelastine	2	201	134	170	0.000333333	0.000402
381	cefixime	4						FALSE	cefixime	2	4	135	234	0.000333333	8e-06
382	chlortalidone	46	chlortalidone	1140909706	C03BA04	Chlorthalidone	FALSE	FALSE	Chlorthalidone	2	62	136	207	0.000333333	0.000124
383	chondroitin product	6509	chondroitin product	1187	M01AX25	Chondroitin Sulfate	FALSE	FALSE	chondroitin sulfate	2	6509	137	33	0.000333333	0.013018
384	citalopram	9554	citalopram	1140921600	N06AB04	Citalopram	FALSE	FALSE	citalopram	2	9728	138	22	0.000333333	0.019456
385	docusate sodium	492	docusate sodium	1140879404	A06AA02	Docusate	FALSE	FALSE	Docusate	2	527	139	131	0.000333333	0.001054
386	eplerenone	102	eplerenone	1141201244	C03DA04	Eplerenone	FALSE	FALSE	eplerenone	2	102	140	189	0.000333333	0.000204
387	felodipine	4745	felodipine	1140888646	C08CA02	Felodipine	FALSE	FALSE	felodipine	2	5627	141	38	0.000333333	0.011254
388	depixol 3mg tablet	64	depixol 3mg tablet	1140867152	N05AF01	Flupentixol	FALSE	FALSE	Flupentixol	2	183	142	173	0.000333333	0.000366
389	gemfibrozil	23	gemfibrozil	1140861856	C10AB04	Gemfibrozil	FALSE	FALSE	gemfibrozil	2	23	143	223	0.000333333	4.6e-05
390	liothyronine	133	liothyronine	1140884512	H03AA02	Liothyronine	FALSE	FALSE	liothyronine	2	144	144	178	0.000333333	0.000288
391	mefenamic acid	564	mefenamic acid	1140871542	M01AG01	Mefenamic Acid	FALSE	FALSE	mefenamic acid	2	632	145	123	0.000333333	0.001264
392	methylphenidate	13	methylphenidate	1140917132	N06BA04	Methylphenidate	FALSE	FALSE	methylphenidate	2	13	146	229	0.000333333	2.6e-05
393	methylprednisolone	23	methylprednisolone	1140874976	D07AA01 |D10AA02 |H02AB04	Methylprednisolone	FALSE	FALSE	methylprednisolone	2	23	147	224	0.000333333	4.6e-05
394	minoxidil	66	minoxidil	1140860532	C02DC01 |D11AX01	Minoxidil	FALSE	FALSE	minoxidil	2	79	148	196	0.000333333	0.000158
395	glyceryl trinitrate	1694	glyceryl trinitrate	1140860834	C01DA02 |C05AE01	Nitroglycerin	FALSE	FALSE	Nitroglycerin	2	5223	149	41	0.000333333	0.010446
396	pyridostigmine	90	pyridostigmine	1140883478	N07AA02	Pyridostigmine	FALSE	FALSE	pyridostigmine	2	119	150	183	0.000333333	0.000238
397	selenium product	1602	selenium product	1140883748	A12CE	Selenium	FALSE	FALSE	Selenium	2	1602	151	89	0.000333333	0.003204
398	sildenafil	1111	sildenafil	1141168936	G04BE03	Sildenafil	FALSE	FALSE	sildenafil	2	1674	152	83	0.000333333	0.003348
399	sodium bicarbonate	147	sodium bicarbonate	1140877826	B05CB04 |B05XA02	Sodium Bicarbonate	FALSE	FALSE	sodium bicarbonate	2	158	153	177	0.000333333	0.000316
400	sodium chloride	23	sodium chloride	2018961142	A12CA01 |B05CB01 |B05XA03 |S01XA03	Sodium Chloride	FALSE	FALSE	sodium chloride	2	71	154	201	0.000333333	0.000142
401	protelos 2g sachets	133	protelos 2g sachets	1141200768	M05BX03	Strontium Ranelate	FALSE	FALSE	Strontium Ranelate	2	133	155	181	0.000333333	0.000266
402	sulfasalazine	1019	sulfasalazine	1140909702	A07EC01	Sulfasalazine	FALSE	FALSE	sulfasalazine	2	1626	156	86	0.000333333	0.003252
403	sulpiride	76	sulpiride	1140867304	N05AL01	Sulpiride	FALSE	FALSE	sulpiride	2	76	157	197	0.000333333	0.000152
404	tibolone	924	tibolone	1140868482	G03CX01	Tibolone	FALSE	FALSE	tibolone	2	1614	158	87	0.000333333	0.003228
405	tinidazole	2						FALSE	tinidazole	2	2	159	236	0.000333333	4e-06
406	ursodeoxycholic acid	172	ursodeoxycholic acid	1141173328	A05AA02	Ursodeoxycholic Acid	FALSE	FALSE	ursodeoxycholic acid	2	292	160	152	0.000333333	0.000584
407	gtn 400micrograms spray	1262	gtn 400micrograms spray	1140851812	C05AE01	Nitroglycerin	TRUE	FALSE	Nitroglycerin	2
408	gtn - glyceryl trinitrate	891	gtn - glyceryl trinitrate	1140923670	C01DA02	Nitroglycerin	TRUE	FALSE	Nitroglycerin	2
409	livial 2.5mg tablet	690	livial 2.5mg tablet	1140882946	G03CX01	Tibolone	TRUE	FALSE	Tibolone	2
410	fosamax 5mg tablet	653	fosamax 5mg tablet	1141176570	M05BA04	Alendronic Acid	TRUE	FALSE	Alendronic Acid	2
411	nitrolingual 400micrograms spray	519	nitrolingual 400micrograms spray	1140860840	C01DA02	Nitroglycerin	TRUE	FALSE	Nitroglycerin	2
412	glyceryl trinitrate product	483	glyceryl trinitrate product	1141157252	C01DA02 |C05AE01	Nitroglycerin	TRUE	FALSE	Nitroglycerin	2
413	cardioplen xl 5mg m/r tablet	350	cardioplen xl 5mg m/r tablet	1141199858	C08CA02	Felodipine	TRUE	FALSE	Felodipine	2
414	alverine	318	alverine	1140879424	A03AX08	Alverine	TRUE	FALSE	alverine	2
415	salazopyrin 500mg tablet	311	salazopyrin 500mg tablet	1140865670	A07EC01	Sulfasalazine	TRUE	FALSE	Sulfasalazine	2
416	sulphasalazine	296	sulphasalazine	1140865668	A07EC01	Sulfasalazine	TRUE	FALSE	Sulfasalazine	2
417	viagra 100mg tablet	200	viagra 100mg tablet	1141168948	G04BE03	Sildenafil	TRUE	FALSE	Sildenafil	2
418	viagra 50mg tablet	195	viagra 50mg tablet	1141168946	G04BE03	Sildenafil	TRUE	FALSE	Sildenafil	2
419	cipramil 10mg tablet	174	cipramil 10mg tablet	1141151946	N06AB04	Citalopram	TRUE	FALSE	Citalopram	2
420	vascalpha 5mg m/r tablet	172	vascalpha 5mg m/r tablet	1141190160	C08CA02	Felodipine	TRUE	FALSE	Felodipine	2
421	viagra 25mg tablet	168	viagra 25mg tablet	1141168944	G04BE03	Sildenafil	TRUE	FALSE	Sildenafil	2
422	nitromin 400micrograms cfc-free spray	146	nitromin 400micrograms cfc-free spray	1141145630	C01DA02	Nitroglycerin	TRUE	FALSE	Nitroglycerin	2
423	felendil xl 5mg m/r tablet	117	felendil xl 5mg m/r tablet	1141188836	C08CA02	Felodipine	TRUE	FALSE	Felodipine	2
424	plendil 2.5mg m/r tablet	80	plendil 2.5mg m/r tablet	1140928212	C08CA02	Felodipine	TRUE	FALSE	Felodipine	2
425	rhinolast 0.1% nasal spray	79	rhinolast 0.1% nasal spray	1141190244	R01AC03	Azelastine	TRUE	FALSE	Azelastine	2
426	coro-nitro spray 400micrograms spray	70	coro-nitro spray 400micrograms spray	1140860836	C05AE01	Nitroglycerin	TRUE	FALSE	Nitroglycerin	2
427	ponstan 250mg capsule	68	ponstan 250mg capsule	1140871546	M01AG01	Mefenamic Acid	TRUE	FALSE	Mefenamic Acid	2
428	flupentixol	60	flupentixol	1140909800	N05AF01	Flupentixol	TRUE	FALSE	flupentixol	2
429	felotens xl 5mg m/r tablet	58	felotens xl 5mg m/r tablet	1141188152	C08CA02	Felodipine	TRUE	FALSE	Felodipine	2
430	neofel xl 5mg m/r tablet	57	neofel xl 5mg m/r tablet	1141200782	C08CA02	Felodipine	TRUE	FALSE	Felodipine	2
431	gtn 300micrograms sublingual tablet	52	gtn 300micrograms sublingual tablet	1140860838	C01DA02	Nitroglycerin	TRUE	FALSE	Nitroglycerin	2
432	ursodesoxycholic acid	47	ursodesoxycholic acid	1140910824	A05AA02	Ursodeoxycholic Acid	TRUE	FALSE	Ursodeoxycholic Acid	2
433	ursofalk 250mg capsule	46	ursofalk 250mg capsule	1140866000	A05AA02	Ursodeoxycholic Acid	TRUE	FALSE	Ursodeoxycholic Acid	2
434	dioctyl 100mg tablet	35	dioctyl 100mg tablet	1140851072	A06AA02	Docusate	TRUE	FALSE	Docusate	2
435	fluanxol 500micrograms tablet	33	fluanxol 500micrograms tablet	1140867952	N05AF01	Flupentixol	TRUE	FALSE	Flupentixol	2
436	suscard 1mg m/r buccal tablet	31	suscard 1mg m/r buccal tablet	1140860846	C01DA02	Nitroglycerin	TRUE	FALSE	Nitroglycerin	2
437	glytrin 400micrograms spray	30	glytrin 400micrograms spray	1140861000	C01DA02	Nitroglycerin	TRUE	FALSE	Nitroglycerin	2
438	mestinon 60mg tablet	29	mestinon 60mg tablet	1140888818	N07AA02	Pyridostigmine	TRUE	FALSE	Pyridostigmine	2
439	ursodeoxycholic acid product	27	ursodeoxycholic acid product	1140865996	A05AA02	Ursodeoxycholic Acid	TRUE	FALSE	Ursodeoxycholic Acid	2
440	flupenthixol	26	flupenthixol	1140867150	N05AF01	Flupentixol	TRUE	FALSE	Flupentixol	2
441	felogen xl 5mg m/r tablet	25	felogen xl 5mg m/r tablet	1141188576	C08CA02	Felodipine	TRUE	FALSE	Felodipine	2
442	cabren 2.5mg m/r tablet	23	cabren 2.5mg m/r tablet	1141187094	C08CA02	Felodipine	TRUE	FALSE	Felodipine	2
443	spasmonal fibre granules 500g	22	spasmonal fibre granules 500g	1141166264	A03AX08	Alverine	TRUE	FALSE	Alverine	2
444	optilast 0.05% eye drops	22	optilast 0.05% eye drops	1141162970	S01GX07	Azelastine	TRUE	FALSE	Azelastine	2
445	sodium chloride eye drops	20	sodium chloride eye drops	1140888376	S01XA03	Sodium Chloride	TRUE	FALSE	Sodium Chloride	2
446	nitroglycerin	18	nitroglycerin	1140910570	C01DA02 |C05AE01	Nitroglycerin	TRUE	FALSE	nitroglycerin	2
447	glyceryl trinitrate patch	17	glyceryl trinitrate patch	1140927544	C01DA02	Nitroglycerin	TRUE	FALSE	Nitroglycerin	2
448	sodium chloride product	15	sodium chloride product	1140876652	A12CA01 |B05CB01 |B05XA03 |S01XA03	Sodium Chloride	TRUE	FALSE	Sodium Chloride	2
449	regaine regular strength 20mg/ml topical liquid	13	regaine regular strength 20mg/ml topical liquid	1140881876	D11AX	Minoxidil	TRUE	FALSE	Minoxidil	2
450	saline 0.9% nose drops	13	saline 0.9% nose drops	1140911574	R01AX10	Sodium Chloride	TRUE	FALSE	Sodium Chloride	2
451	hygroton 50mg tablet	12	hygroton 50mg tablet	1140866146	C03BA04	Chlorthalidone	TRUE	FALSE	Chlorthalidone	2
452	sodium liothyronine	11	sodium liothyronine	1140910520	H03AA02	Liothyronine	TRUE	FALSE	Liothyronine	2
453	bicarbonate of soda	11	bicarbonate of soda	1140888768	B05CB04 |B05XA02	Sodium Bicarbonate	TRUE	FALSE	Sodium Bicarbonate	2
454	gtn - glyceryl trinitrate patch	10	gtn - glyceryl trinitrate patch	1140927548	C01DA02	Nitroglycerin	TRUE	FALSE	Nitroglycerin	2
455	chlorthalidone	4						FALSE	chlorthalidone	2
456	acetazolamide	29	acetazolamide	1140875868	S01EC01	Acetazolamide	FALSE	FALSE	acetazolamide	1	43	161	215	0.000166667	8.6e-05
457	acetylcysteine	36	acetylcysteine	1140862938	R05CB01 |S01XA08 |V03AB23	Acetylcysteine	FALSE	FALSE	acetylcysteine	1	76	162	198	0.000166667	0.000152
458	acyclovir	185	acyclovir	1140909954	D06BB03 |J05AB01 |S01AD03	Aciclovir	FALSE	FALSE	acyclovir	1	185	163	172	0.000166667	0.00037
459	albendazole	1						FALSE	albendazole	1	1	164	237	0.000166667	2e-06
460	amantadine	152	amantadine	1140879644	N04BB01	Amantadine	FALSE	FALSE	amantadine	1	169	165	176	0.000166667	0.000338
461	amiodarone	462	amiodarone	1140888502	C01BD01	Amiodarone	FALSE	FALSE	amiodarone	1	462	166	135	0.000166667	0.000924
462	arimidex 1mg tablet	909	arimidex 1mg tablet	1140923022	L02BG03	Anastrozole	FALSE	FALSE	Anastrozole	1	1505	167	92	0.000166667	0.00301
463	aripiprazole	73	aripiprazole	1141195974	N05AX12	Aripiprazole	FALSE	FALSE	aripiprazole	1	86	168	192	0.000166667	0.000172
464	atropine	27	atropine	1140883494	A03BA01 |S01FA01	Atropine	FALSE	FALSE	atropine	1	27	169	220	0.000166667	5.4e-05
465	baclofen	585	baclofen	1140875420	M03BX01	Baclofen	FALSE	FALSE	baclofen	1	585	170	128	0.000166667	0.00117
466	balsalazide disodium	151	balsalazide disodium	1141153242	A07EC04	Balsalazide	FALSE	FALSE	Balsalazide	1	219	171	166	0.000166667	0.000438
467	beclometasone	4811	beclometasone	1140909786	A07EA07 |D07AC15 |R01AD01 |R03BA01	Beclomethasone Dipropionate	FALSE	FALSE	Beclomethasone Dipropionate	1	19352	172	15	0.000166667	0.038704
468	beta-carotene product	62	beta-carotene product	1140911728	A11CA02 |D02BB01	Beta Carotene	FALSE	FALSE	Beta Carotene	1	62	173	208	0.000166667	0.000124
469	brimonidine tartrate	160	brimonidine tartrate	1141150750	D11AX21 |S01EA05	Brimonidine	FALSE	FALSE	Brimonidine	1	272	174	158	0.000166667	0.000544
470	bromazepam	5						FALSE	bromazepam	1	5	175	233	0.000166667	1e-05
471	buspirone	72	buspirone	1140879730	N05BE01	Buspirone	FALSE	FALSE	buspirone	1	84	176	193	0.000166667	0.000168
472	calcitriol	57	calcitriol	1141174388	A11CC04 |D05AX03	Calcitriol	FALSE	FALSE	calcitriol	1	116	177	186	0.000166667	0.000232
473	carbimazole	450	carbimazole	1140874866	H03BB01	Carbimazole	FALSE	FALSE	carbimazole	1	450	178	136	0.000166667	0.0009
474	cilazapril	25	cilazapril	1140860882	C09AA08	Cilazapril	FALSE	FALSE	cilazapril	1	25	179	221	0.000166667	5e-05
475	ciprofloxacin	193	ciprofloxacin	1140874138	J01MA02 |S01AE03 |S02AA15 |S03AA07	Ciprofloxacin	FALSE	FALSE	ciprofloxacin	1	210	180	168	0.000166667	0.00042
476	clarithromycin	117	clarithromycin	1140873634	J01FA09	Clarithromycin	FALSE	FALSE	clarithromycin	1	117	181	185	0.000166667	0.000234
477	clonazepam	409	clonazepam	1140872150	N03AE01	Clonazepam	FALSE	FALSE	clonazepam	1	436	182	137	0.000166667	0.000872
478	colchicine	274	colchicine	1140875486	M04AC01	Colchicine	FALSE	FALSE	colchicine	1	274	183	157	0.000166667	0.000548
479	dexamethasone	137	dexamethasone	1140874816	A01AC02 |C05AA09 |D07AB19 |D07XB05 |D10AA03 |H02AB02 |R01AD03 |S01BA01 |S01CB01 |S02BA06 |S03BA01	Dexamethasone	FALSE	FALSE	dexamethasone	1	257	184	161	0.000166667	0.000514
480	aricept 5mg tablet	26	aricept 5mg tablet	1141150840	N06DA02	Donepezil	FALSE	FALSE	Donepezil	1	51	185	212	0.000166667	0.000102
481	dorzolamide	174	dorzolamide	1140922714	S01EC03	Dorzolamide	FALSE	FALSE	dorzolamide	1	268	186	159	0.000166667	0.000536
482	doxazosin	6609	doxazosin	1140879778	C02CA04	Doxazosin	FALSE	FALSE	doxazosin	1	6901	187	29	0.000166667	0.013802
483	epinephrine	56	epinephrine	1140888770	A01AD01 |B02BC09 |C01CA24 |R01AA14 |R03AA01 |S01EA01	Epinephrine	FALSE	FALSE	epinephrine	1	110	188	187	0.000166667	0.00022
484	neorecormon 500iu injection (pdr for recon)+solvent	23	neorecormon 500iu injection (pdr for recon)+solvent	1141156666	B03XA01	Erythropoietin	FALSE	FALSE	Erythropoietin	1	50	189	214	0.000166667	0.0001
485	etoricoxib	467	etoricoxib	1141180140	M01AH05	Etoricoxib	FALSE	FALSE	etoricoxib	1	877	190	115	0.000166667	0.001754
486	exemestane	237	exemestane	1141171100	L02BG06	Exemestane	FALSE	FALSE	exemestane	1	318	191	150	0.000166667	0.000636
487	fludrocortisone	232	fludrocortisone	1140884672	H02AA02	Fludrocortisone	FALSE	FALSE	fludrocortisone	1	244	192	163	0.000166667	0.000488
488	fml eye drops	33	fml eye drops	1140878052	S01BA07	Fluorometholone	FALSE	FALSE	Fluorometholone	1	56	193	211	0.000166667	0.000112
489	fluvoxamine	31	fluvoxamine	1140879544	N06AB08	Fluvoxamine	FALSE	FALSE	fluvoxamine	1	31	194	218	0.000166667	6.2e-05
490	fucidin cream	86	fucidin cream	1140882542	D06AX01	Fusidic Acid	FALSE	FALSE	Fusidic Acid	1	183	195	174	0.000166667	0.000366
491	zoladex 3.6mg implant	306	zoladex 3.6mg implant	1140870196	L02AE03	Goserelin	FALSE	FALSE	Goserelin	1	372	196	146	0.000166667	0.000744
492	haloperidol	75	haloperidol	1140867168	N05AD01	Haloperidol	FALSE	FALSE	haloperidol	1	100	197	190	0.000166667	0.0002
493	imipramine	267	imipramine	1140879630	N06AA02	Imipramine	FALSE	FALSE	imipramine	1	267	198	160	0.000166667	0.000534
494	labetalol	73	labetalol	1140879824	C07AG01	Labetalol	FALSE	FALSE	labetalol	1	73	199	199	0.000166667	0.000146
495	lamotrigine	684	lamotrigine	1140872290	N03AX09	Lamotrigine	FALSE	FALSE	lamotrigine	1	777	200	119	0.000166667	0.001554
496	leflunomide	235	leflunomide	1141166294	L04AA13	Leflunomide	FALSE	FALSE	leflunomide	1	247	201	162	0.000166667	0.000494
497	lercanidipine	1569	lercanidipine	1141153026	C08CA13	Lercanidipine	FALSE	FALSE	lercanidipine	1	1783	202	82	0.000166667	0.003566
498	letrozole	493	letrozole	1141145896	L02BG04	Letrozole	FALSE	FALSE	letrozole	1	606	203	125	0.000166667	0.001212
499	levodopa	21	levodopa	1140872320	N04BA01	Levodopa	FALSE	FALSE	levodopa	1	21	204	226	0.000166667	4.2e-05
500	levofloxacin	7						FALSE	levofloxacin	1	7	205	232	0.000166667	1.4e-05
501	mebendazole	1						FALSE	mebendazole	1	1	206	238	0.000166667	2e-06
502	depo-provera 50mg/1ml injection	369	depo-provera 50mg/1ml injection	1140857620	G03AC06	Medroxyprogesterone Acetate	FALSE	FALSE	Medroxyprogesterone Acetate	1	499	207	134	0.000166667	0.000998
503	methyldopa	72	methyldopa	1140860470	C02AB	Methyldopa	FALSE	FALSE	methyldopa	1	72	208	200	0.000166667	0.000144
504	metolazone	15	metolazone	1140866092	C03BA08	Metolazone	FALSE	FALSE	metolazone	1	15	209	228	0.000166667	3e-05
505	mirtazapine	1604	mirtazapine	1141152732	N06AX11	Mirtazapine	FALSE	FALSE	mirtazapine	1	1667	210	84	0.000166667	0.003334
506	naphazoline	1						FALSE	naphazoline	1	1	211	239	0.000166667	2e-06
507	nitrofurantoin	333	nitrofurantoin	1140874126	J01XE01	Nitrofurantoin	FALSE	FALSE	nitrofurantoin	1	386	212	143	0.000166667	0.000772
508	nortriptyline	359	nortriptyline	1140867818	N06AA10	Nortriptyline	FALSE	FALSE	nortriptyline	1	369	213	147	0.000166667	0.000738
509	opatanol 1mg/ml eye drops	37	opatanol 1mg/ml eye drops	1141192302	S01GX09	Olopatadine	FALSE	FALSE	Olopatadine	1	68	214	204	0.000166667	0.000136
510	oxcarbazepine	39	oxcarbazepine	1141175204	N03AF02	Oxcarbazepine	FALSE	FALSE	oxcarbazepine	1	39	215	216	0.000166667	7.8e-05
511	paraffin-white soft	18	paraffin-white soft	1140910368	D02AC	Petrolatum	FALSE	FALSE	Petrolatum	1	18	216	227	0.000166667	3.6e-05
512	phentermine	8						FALSE	phentermine	1	8	217	231	0.000166667	1.6e-05
513	phenytoin	490	phenytoin	2038460076	N03AB02	Phenytoin	FALSE	FALSE	phenytoin	1	863	218	116	0.000166667	0.001726
514	pilocarpine	93	pilocarpine	1140875816	N07AX01 |S01EB01	Pilocarpine	FALSE	FALSE	pilocarpine	1	104	219	188	0.000166667	0.000208
515	macrogol ointment	130	macrogol ointment	1140854076	A06AD15	Polyethylene Glycol	FALSE	FALSE	Polyethylene Glycol	1	130	220	182	0.000166667	0.00026
516	cymalon cranberry 1.5g/5ml liquid	176	cymalon cranberry 1.5g/5ml liquid	1141200108	A12BA02	Potassium Citrate	FALSE	FALSE	Potassium Citrate	1	196	221	171	0.000166667	0.000392
517	procyclidine	216	procyclidine	1140883476	N04AA04	Procyclidine	FALSE	FALSE	procyclidine	1	216	222	167	0.000166667	0.000432
518	propafenone	49	propafenone	1140888482	C01BC03	Propafenone	FALSE	FALSE	propafenone	1	63	223	206	0.000166667	0.000126
519	ribavirin	25	ribavirin	1140909754	J05AP01	Ribavirin	FALSE	FALSE	ribavirin	1	25	224	222	0.000166667	5e-05
520	risperidone	283	risperidone	1140867444	N05AX08	Risperidone	FALSE	FALSE	risperidone	1	320	225	149	0.000166667	0.00064
521	hyoscine	64	hyoscine	1140882104	A04AD01 |N05CM05 |S01FA02	Scopolamine	FALSE	FALSE	Scopolamine	1	80	226	195	0.000166667	0.00016
522	sirolimus	11	sirolimus	1141173926	L04AA10 |S01XA23	Sirolimus	FALSE	FALSE	sirolimus	1	11	227	230	0.000166667	2.2e-05
523	solifenacin	1036	solifenacin	1141200322	G04BD08	Solifenacin	FALSE	FALSE	solifenacin	1	1608	228	88	0.000166667	0.003216
524	sotalol	805	sotalol	1140879854	C07AA07	Sotalol	FALSE	FALSE	sotalol	1	820	229	117	0.000166667	0.00164
525	stanozolol	0						FALSE	stanozolol	1	0	230	241	0.000166667	0
526	tacrolimus	233	tacrolimus	1140911642	D11AH01 |L04AD02	Tacrolimus	FALSE	FALSE	tacrolimus	1	377	231	144	0.000166667	0.000754
527	tamoxifen	1798	tamoxifen	1140870164	L02BA01	Tamoxifen	FALSE	FALSE	tamoxifen	1	1798	232	81	0.000166667	0.003596
528	testosterone product	368	testosterone product	1140868532	G03BA03	Testosterone	FALSE	FALSE	Testosterone	1	659	233	122	0.000166667	0.001318
529	restandol 40mg capsule	28	restandol 40mg capsule	1140868536	G03BA03	Testosterone Undecanoate	FALSE	FALSE	Testosterone Undecanoate	1	28	234	219	0.000166667	5.6e-05
530	tizanidine	69	tizanidine	1141153186	M03BX02	Tizanidine	FALSE	FALSE	tizanidine	1	69	235	202	0.000166667	0.000138
531	tramadol	5927	tramadol	1140864992	N02AX02	Tramadol	FALSE	FALSE	tramadol	1	6147	236	34	0.000166667	0.012294
532	travatan 40micrograms/ml eye drops	391	travatan 40micrograms/ml eye drops	1141185326	S01EE04	Travoprost	FALSE	FALSE	Travoprost	1	621	237	124	0.000166667	0.001242
533	trifluoperazine	108	trifluoperazine	1140868120	N05AB06	Trifluoperazine	FALSE	FALSE	trifluoperazine	1	175	238	175	0.000166667	0.00035
534	valaciclovir	37	valaciclovir	1140916890	J05AB11	Valaciclovir	FALSE	FALSE	valaciclovir	1	51	239	213	0.000166667	0.000102
535	vardenafil	139	vardenafil	1141192248	G04BE09	Vardenafil	FALSE	FALSE	vardenafil	1	231	240	165	0.000166667	0.000462
536	zolpidem	342	zolpidem	1140865016	N05CF02	Zolpidem	FALSE	FALSE	zolpidem	1	377	241	145	0.000166667	0.000754
537	beconase 50micrograms nasal spray	3604	beconase 50micrograms nasal spray	1140876136	R01AD01	Beclomethasone Dipropionate	TRUE	FALSE	Beclomethasone Dipropionate	1
538	becotide 50 inhaler	3264	becotide 50 inhaler	1140862382	R03BA01	Beclomethasone Dipropionate	TRUE	FALSE	Beclomethasone Dipropionate	1
539	beclomethasone	2126	beclomethasone	1140884654	A07EA07 |D07AC15 |R01AD01 |R03BA01	Beclomethasone Dipropionate	TRUE	FALSE	Beclomethasone Dipropionate	1
540	qvar 50 inhaler	2092	qvar 50 inhaler	1141167594	R03BA01	Beclomethasone Dipropionate	TRUE	FALSE	Beclomethasone Dipropionate	1
541	beclazone 50 inhaler	1435	beclazone 50 inhaler	1140862476	R03BA01	Beclomethasone Dipropionate	TRUE	FALSE	Beclomethasone Dipropionate	1
542	rino clenil 50micrograms nasal spray	1055	rino clenil 50micrograms nasal spray	1141192916	R01AD01	Beclomethasone Dipropionate	TRUE	FALSE	Beclomethasone Dipropionate	1
543	anastrozole	596	anastrozole	1140923018	L02BG03	Anastrozole	TRUE	FALSE	anastrozole	1
544	vesicare 5mg tablet	572	vesicare 5mg tablet	1141200384	G04BD08	Solifenacin	TRUE	FALSE	Solifenacin	1
545	epanutin 25mg capsule	356	epanutin 25mg capsule	1140872112	N03AB02	Phenytoin	TRUE	FALSE	Phenytoin	1
546	becloforte 250micrograms inhaler	288	becloforte 250micrograms inhaler	1140862380	R03BA01	Beclomethasone Dipropionate	TRUE	FALSE	Beclomethasone Dipropionate	1
547	cardura 1mg tablet	267	cardura 1mg tablet	1140860690	C02CA04	Doxazosin	TRUE	FALSE	Doxazosin	1
548	nasobec aqueous 50micrograms nasal spray	231	nasobec aqueous 50micrograms nasal spray	1141145638	R01AD01	Beclomethasone Dipropionate	TRUE	FALSE	Beclomethasone Dipropionate	1
549	travoprost	230	travoprost	1141185316	S01EE04	Travoprost	TRUE	FALSE	travoprost	1
550	zanidip 10mg tablet	214	zanidip 10mg tablet	1141153032	C08CA13	Lercanidipine	TRUE	FALSE	Lercanidipine	1
551	testogel 50mg gel 5g sachet	212	testogel 50mg gel 5g sachet	1141193272	G03BA03	Testosterone	TRUE	FALSE	Testosterone	1
552	arcoxia 60mg tablet	191	arcoxia 60mg tablet	1141180148	M01AH05	Etoricoxib	TRUE	FALSE	Etoricoxib	1
553	beclomist 50micrograms nasal spray	167	beclomist 50micrograms nasal spray	1141167708	R01AD01	Beclomethasone Dipropionate	TRUE	FALSE	Beclomethasone Dipropionate	1
554	arcoxia 90mg tablet	139	arcoxia 90mg tablet	1141180150	M01AH05	Etoricoxib	TRUE	FALSE	Etoricoxib	1
555	zydol 50mg capsule	136	zydol 50mg capsule	1140865000	N02AX02	Tramadol	TRUE	FALSE	Tramadol	1
556	maxidex eye drops	120	maxidex eye drops	1140882722	S01BA01	Dexamethasone	TRUE	FALSE	Dexamethasone	1
557	femara 2.5mg tablet	113	femara 2.5mg tablet	1141145900	L02BG04	Letrozole	TRUE	FALSE	Letrozole	1
558	alphagan 0.2% eye drops	112	alphagan 0.2% eye drops	1141150754	S01EA05	Brimonidine	TRUE	FALSE	Brimonidine	1
559	protopic 0.03% ointment	100	protopic 0.03% ointment	1141179846	D11AH01	Tacrolimus	TRUE	FALSE	Tacrolimus	1
560	trusopt 2% ophthalmic solution	94	trusopt 2% ophthalmic solution	1140922718	S01EC03	Dorzolamide	TRUE	FALSE	Dorzolamide	1
561	lamictal 25mg tablet	93	lamictal 25mg tablet	1140872302	N03AX09	Lamotrigine	TRUE	FALSE	Lamotrigine	1
562	aromasin 25mg tablet	81	aromasin 25mg tablet	1141171104	L02BG06	Exemestane	TRUE	FALSE	Exemestane	1
563	arcoxia 120mg tablet	80	arcoxia 120mg tablet	1141180152	M01AH05	Etoricoxib	TRUE	FALSE	Etoricoxib	1
564	nebido 1000mg/4ml solution for injection	79	nebido 1000mg/4ml solution for injection	1141201718	G03BA03	Testosterone	TRUE	FALSE	Testosterone	1
565	beclo-aqua 50 nasal spray	73	beclo-aqua 50 nasal spray	1141163146	R01AD01	Beclomethasone Dipropionate	TRUE	FALSE	Beclomethasone Dipropionate	1
566	colazide 750mg capsule	68	colazide 750mg capsule	1141153248	A07EC	Balsalazide	TRUE	FALSE	Balsalazide	1
567	stelazine 1mg tablet	67	stelazine 1mg tablet	1140867244	N05AB06	Trifluoperazine	TRUE	FALSE	Trifluoperazine	1
568	medroxyprogesterone	65	medroxyprogesterone	1140869270	G03AC06 |G03DA02 |L02AB02	Medroxyprogesterone Acetate	TRUE	FALSE	Medroxyprogesterone Acetate	1
569	provera 2.5mg tablet	65	provera 2.5mg tablet	1140864232	G03DA02	Medroxyprogesterone Acetate	TRUE	FALSE	Medroxyprogesterone Acetate	1
570	zispin 30mg tablet	63	zispin 30mg tablet	1141152736	N06AX11	Mirtazapine	TRUE	FALSE	Mirtazapine	1
571	asmabec 50micrograms spacehaler	60	asmabec 50micrograms spacehaler	1141153270	R03BA01	Beclomethasone Dipropionate	TRUE	FALSE	Beclomethasone Dipropionate	1
572	pulvinal beclomethasone diprop 100mcg breath-act dry pdr inh	54	pulvinal beclomethasone diprop 100mcg breath-act dry pdr inh	1141179072	R03BA01	Beclomethasone Dipropionate	TRUE	FALSE	Beclomethasone Dipropionate	1
573	adrenaline product	54	adrenaline product	1140862290	A01AD01 |B02BC09 |C01CA24 |R01AA14 |R03AA01 |S01EA01	Epinephrine	TRUE	FALSE	Epinephrine	1
574	becodisks 100micrograms disks+diskhaler	52	becodisks 100micrograms disks+diskhaler	1140881922	R03BA01	Beclomethasone Dipropionate	TRUE	FALSE	Beclomethasone Dipropionate	1
575	goserelin	52	goserelin	1140870194	L02AE03	Goserelin	TRUE	FALSE	goserelin	1
576	fusidic acid	46	fusidic acid	1140859220	D06AX01 |D09AA02 |J01XC01 |S01AA13	Fusidic Acid	TRUE	FALSE	fusidic acid	1
577	levitra 20mg tablet	42	levitra 20mg tablet	1141192260	G04BE09	Vardenafil	TRUE	FALSE	Vardenafil	1
578	levitra 10mg tablet	40	levitra 10mg tablet	1141192258	G04BE09	Vardenafil	TRUE	FALSE	Vardenafil	1
579	risperdal 0.5mg tablet	37	risperdal 0.5mg tablet	1141177762	N05AX08	Risperidone	TRUE	FALSE	Risperidone	1
580	stilnoct 5mg tablet	35	stilnoct 5mg tablet	1140864916	N05CF02	Zolpidem	TRUE	FALSE	Zolpidem	1
581	fucithalmic m/r eye drops	34	fucithalmic m/r eye drops	1140875736	S01AA13	Fusidic Acid	TRUE	FALSE	Fusidic Acid	1
582	zamadol 50mg capsule	34	zamadol 50mg capsule	1140928742	N02AX02	Tramadol	TRUE	FALSE	Tramadol	1
583	macrodantin 50mg capsule	31	macrodantin 50mg capsule	1140874190	J01XE01	Nitrofurantoin	TRUE	FALSE	Nitrofurantoin	1
584	olopatadine	31	olopatadine	1141192298	R01AC08	Olopatadine	TRUE	FALSE	olopatadine	1
585	aerobec 50mcg autohaler	30	aerobec 50mcg autohaler	1140862474	R03BA01	Beclomethasone Dipropionate	TRUE	FALSE	Beclomethasone Dipropionate	1
586	silkis 3micrograms/g ointment	30	silkis 3micrograms/g ointment	1141180200	D05AX03	Calcitriol	TRUE	FALSE	Calcitriol	1
587	calcitriol product	29	calcitriol product	1140870980	A11CC04 |D05AX03	Calcitriol	TRUE	FALSE	Calcitriol	1
588	ilube eye drops	27	ilube eye drops	1140882072	S01XA08	Acetylcysteine	TRUE	FALSE	Acetylcysteine	1
589	rivotril 500mcg tablet	27	rivotril 500mcg tablet	1140872152	N03AE01	Clonazepam	TRUE	FALSE	Clonazepam	1
590	zamadol sr 100mg m/r capsule	26	zamadol sr 100mg m/r capsule	1141153424	N02AX02	Tramadol	TRUE	FALSE	Tramadol	1
591	donepezil hydrochloride	25	donepezil hydrochloride	1141150834	N06DA02	Donepezil	TRUE	FALSE	Donepezil	1
592	doxadura 1mg tablet	25	doxadura 1mg tablet	1141194372	C02CA04	Doxazosin	TRUE	FALSE	Doxazosin	1
593	prograf 0.5mg capsule	25	prograf 0.5mg capsule	1141171242	L04AD02	Tacrolimus	TRUE	FALSE	Tacrolimus	1
594	zydol sr 100mg m/r tablet	24	zydol sr 100mg m/r tablet	1140922636	N02AX02	Tramadol	TRUE	FALSE	Tramadol	1
595	fluorometholone	23	fluorometholone	1140875766	C05AA06 |D07AB06 |D07XB04 |D10AA01 |S01BA07 |S01CB05	Fluorometholone	TRUE	FALSE	fluorometholone	1
596	macrodantin 100mg capsule	22	macrodantin 100mg capsule	1140874192	J01XE01	Nitrofurantoin	TRUE	FALSE	Nitrofurantoin	1
597	potassium citrate 3g/sachet granules	20	potassium citrate 3g/sachet granules	1140869412	A12BA02	Potassium Citrate	TRUE	FALSE	Potassium Citrate	1
598	tacrolimus monohydrate 0.03% ointment	19	tacrolimus monohydrate 0.03% ointment	1141179842	D11AH01	Tacrolimus	TRUE	FALSE	Tacrolimus	1
599	symmetrel 100mg capsule	17	symmetrel 100mg capsule	1140872440	N04BB01	Amantadine	TRUE	FALSE	Amantadine	1
600	ciprofloxacin product	17	ciprofloxacin product	1141157366	J01MA02 |S01AE03 |S02AA15 |S03AA07	Ciprofloxacin	TRUE	FALSE	Ciprofloxacin	1
601	fucidin ointment	17	fucidin ointment	1140882544	D06AX01	Fusidic Acid	TRUE	FALSE	Fusidic Acid	1
602	phenytoin product	17	phenytoin product	1140872098	N03AB02	Phenytoin	TRUE	FALSE	Phenytoin	1
603	erythropoietin product	15	erythropoietin product	1140870568	B03XA01	Erythropoietin	TRUE	FALSE	Erythropoietin	1
604	hyoscine product	15	hyoscine product	1141157482	A04AD01 |N05CM05 |S01FA02	Scopolamine	TRUE	FALSE	Scopolamine	1
605	beta-cardone 40mg tablet	15	beta-cardone 40mg tablet	1140860304	C07AA07	Sotalol	TRUE	FALSE	Sotalol	1
606	diamox 250mg tablet	14	diamox 250mg tablet	1140875870	S01EC01	Acetazolamide	TRUE	FALSE	Acetazolamide	1
607	goserelin product	14	goserelin product	1141157394	L02AE03	Goserelin	TRUE	FALSE	Goserelin	1
608	arythmol 150mg tablet	14	arythmol 150mg tablet	1140866612	C01BC03	Propafenone	TRUE	FALSE	Propafenone	1
609	valtrex 500mg tablet	14	valtrex 500mg tablet	1140916894	J05AB11	Valaciclovir	TRUE	FALSE	Valaciclovir	1
610	n-acetylcysteine	13	n-acetylcysteine	1140909720	R05CB01 |S01XA08 |V03AB23	Acetylcysteine	TRUE	FALSE	Acetylcysteine	1
611	abilify 5mg tablet	13	abilify 5mg tablet	1141202024	N05AX12	Aripiprazole	TRUE	FALSE	Aripiprazole	1
612	serenace 500micrograms capsule	13	serenace 500micrograms capsule	1140867092	N05AD01	Haloperidol	TRUE	FALSE	Haloperidol	1
613	buspar 5mg tablet	12	buspar 5mg tablet	1140863454	N05BE01	Buspirone	TRUE	FALSE	Buspirone	1
614	epoetin beta	12	epoetin beta	1140870618	B03XA01	Erythropoietin	TRUE	FALSE	Erythropoietin	1
615	florinef 100mcg tablet	12	florinef 100mcg tablet	1140874784	H02AA02	Fludrocortisone	TRUE	FALSE	Fludrocortisone	1
616	haldol 5mg tablet	12	haldol 5mg tablet	1140867184	N05AD01	Haloperidol	TRUE	FALSE	Haloperidol	1
617	arava 10mg tablet	12	arava 10mg tablet	1141166302	L04AA13	Leflunomide	TRUE	FALSE	Leflunomide	1
618	salagen 5mg tablet	11	salagen 5mg tablet	1140917478	N07AX01	Pilocarpine	TRUE	FALSE	Pilocarpine	1
619	vivabec 50micrograms nasal spray	10	vivabec 50micrograms nasal spray	1141184608	R01AD01	Beclomethasone Dipropionate	TRUE	FALSE	Beclomethasone Dipropionate	1
620	allegron 10mg tablet	10	allegron 10mg tablet	1140867820	N06AA10	Nortriptyline	TRUE	FALSE	Nortriptyline	1
621	levitra 5mg tablet	10	levitra 5mg tablet	1141192256	G04BE09	Vardenafil	TRUE	FALSE	Vardenafil	1
622	scopolamine	1						FALSE	scopolamine	1
623	bendroflumethiazide	30052	bendroflumethiazide	1141194794	C03AA01	Bendroflumethiazide	FALSE	TRUE
624	cod liver oil capsule	29961	cod liver oil capsule	1140909674	A11CB	Cod Liver Oil	FALSE	TRUE
625	Free-text entry, unable to be coded	25899						TRUE
626	co-codamol	12480	co-codamol	1140923346	N02AJ06	Acetaminophen |Codeine	FALSE	TRUE
627	evening primrose oil	8103	evening primrose oil	1140916682	D11AX02	Evening Primrose Oil	FALSE	TRUE
628	multivitamin+mineral preparations	7405	multivitamin+mineral preparations	1140876592	A11AA	Mineral |Multivitamin	FALSE	TRUE
629	vitamin c product	6443	vitamin c product	1140909726	A11GA	Vitamin C	FALSE	TRUE
630	seretide 50 evohaler	6292	seretide 50 evohaler	1141176832	R03AK06	Salmeterol |Fluticasone Propionate	FALSE	TRUE
631	calcichew d3 tablet	5601	calcichew d3 tablet	1140871050	A12AX	Cholecalciferol |Calcium Carbonate	FALSE	TRUE
632	adcal-d3 1.5g/10micrograms chewable tablet	4166	adcal-d3 1.5g/10micrograms chewable tablet	1141164828	A12AX	Cholecalciferol |Calcium Carbonate	TRUE	TRUE
633	quinine	3641	quinine	1140874420	P01BC01	Quinine	FALSE	TRUE
634	symbicort 100/6 turbohaler	3413	symbicort 100/6 turbohaler	1141174520	R03AK07	Formoterol |Budesonide	FALSE	TRUE
635	co-dydramol	3335	co-dydramol	1140923350	N02AJ01	Acetaminophen |Dihydrocodeine	FALSE	TRUE
636	bendrofluazide	3144	bendrofluazide	1140866122	C03AA01	Bendroflumethiazide	FALSE	TRUE
637	gaviscon liquid	2985	gaviscon liquid	1140865354	A02BX13	Sodium Bicarbonate |Calcium Carbonate |Alginic Acid	FALSE	TRUE
638	ginkgo forte tablet	2896	ginkgo forte tablet	1140911734	N06DX02	Ginkgo Biloba	FALSE	TRUE
639	codeine	2867	codeine	1140884444	R05DA04	Codeine	FALSE	TRUE
640	calcium+vitamin d 500units tablet	2462	calcium+vitamin d 500units tablet	1140852948	A12AX	Cholecalciferol |Calcium Carbonate	FALSE	TRUE
641	flixonase 50micrograms aqueous nasal spray	2156	flixonase 50micrograms aqueous nasal spray	1140876076	R01AD08	Fluticasone Propionate	FALSE	TRUE
642	premarin 625micrograms tablet	2155	premarin 625micrograms tablet	1140868408	G03CA57	Conjugated Estrogens	FALSE	TRUE
643	co-enzyme q10/ubiquinone/bio-quinone/coenzyme q10	1882	co-enzyme q10/ubiquinone/bio-quinone/coenzyme q10	1189	C01EB09	Ubidecarenone	FALSE	TRUE
644	zopiclone	1882	zopiclone	1140863144	N05CF01	Zopiclone	FALSE	TRUE
645	adcal 600mg chewable tablet	1872	adcal 600mg chewable tablet	1141171948	A12AA04	Calcium Carbonate	FALSE	TRUE
646	food supplement/plant/herbal extract	1859						TRUE
647	dosulepin	1807	dosulepin	1140909806	N06AA16	Dosulepin	FALSE	TRUE
648	dihydrocodeine	1795	dihydrocodeine	1140884464	N02AA08	Dihydrocodeine	FALSE	TRUE
649	isosorbide mononitrate	1785	isosorbide mononitrate	1140860954	C01DA14	Isosorbide Mononitrate	FALSE	TRUE
650	loperamide	1761	loperamide	1140879464	A07DA03	Loperamide	FALSE	TRUE
651	nicorandil	1732	nicorandil	1140910766	C01DX16	Nicorandil	FALSE	TRUE
652	movicol oral powder	1706	movicol oral powder	1140925800	A06AD65	Potassium Chloride |Sodium Bicarbonate |Sodium Chloride |Polyethylene Glycol	FALSE	TRUE
653	vagifem 25mcg pessary	1695	vagifem 25mcg pessary	1140868472	G03CA03	Estradiol	FALSE	TRUE
654	sumatriptan	1522	sumatriptan	1140884412	N02CC01	Sumatriptan	FALSE	TRUE
655	oxytetracycline	1514	oxytetracycline	1140873548	D06AA03 |G01AA07 |J01AA06 |S01AA04	Oxytetracycline	FALSE	TRUE
656	xalatan 0.005% eye drops	1502	xalatan 0.005% eye drops	1141146198	S01EE01	Latanoprost	FALSE	TRUE
657	vitamin c product	1483	vitamin c product	1140909726	A11GA	Vitamin C	FALSE	TRUE
658	diazepam	1455	diazepam	1140863152	N05BA01	Diazepam	FALSE	TRUE
659	lactulose product	1450	lactulose product	1140865800	A06AD11	Lactulose	FALSE	TRUE
660	digoxin	1371	digoxin	2038459814	C01AA05	Digoxin	FALSE	TRUE
661	tiotropium	1345	tiotropium	1141182628	R03BB04	Tiotropium	FALSE	TRUE
662	calcichew 1.25g chewable tablet	1321	calcichew 1.25g chewable tablet	1140870856	A12AA04	Calcium Carbonate	FALSE	TRUE
663	latanoprost	1316	latanoprost	1141146188	S01EE01	Latanoprost	FALSE	TRUE
664	oxybutynin	1278	oxybutynin	1140883568	G04BD04	Oxybutynin	FALSE	TRUE
665	viscotears liquid eye gel	1275	viscotears liquid eye gel	1140865010	S01XA20	Carbomer 980	FALSE	TRUE
666	bricanyl 250mcg inhaler	1216	bricanyl 250mcg inhaler	1140862168	R03AC03	Terbutaline	FALSE	TRUE
667	evening primrose oil product	1133	evening primrose oil product	1197	D11AX02	Evening Primrose Oil	FALSE	TRUE
668	fybogel orange s/f granules	1102	fybogel orange s/f granules	1141180036	A06AC01	Plantago Seed	FALSE	TRUE
669	tolterodine l-tartrate	1084	tolterodine l-tartrate	1141162764	G04BD07	Tolterodine	FALSE	TRUE
670	terbinafine	1079	terbinafine	1140927328	D01AE15 |D01BA02	Terbinafine	FALSE	TRUE
671	senna	1072	senna	1140865716	A06AB06	Senna Glycoside	FALSE	TRUE
672	kliovance 1mg/0.5mg tablet	1070	kliovance 1mg/0.5mg tablet	1141168326	G03FA01	Norethisterone |Estradiol	FALSE	TRUE
673	risedronate sodium	1066	risedronate sodium	1141175684	M05BA07	Risedronate	FALSE	TRUE
674	elleste duet conti tablet	1059	elleste duet conti tablet	1141156644	G03FA01	Norethisterone |Estradiol	FALSE	TRUE
675	temazepam	1059	temazepam	1140863202	N05CD07	Temazepam	FALSE	TRUE
676	estradiol product	1057	estradiol product	1141181700	G03CA	Estradiol	FALSE	TRUE
677	hydrocortisone	998	hydrocortisone	1140874896	A01AC03 |A07EA02 |C05AA01 |D07AA02 |D07XA01 |H02AB09 |S01BA02 |S01CB03 |S02BA01	Hydrocortisone	FALSE	TRUE
678	premique 0.625mg/5mg tablet	983	premique 0.625mg/5mg tablet	1140922804	G03FA12	Conjugated Estrogens |Medroxyprogesterone Acetate	FALSE	TRUE
679	hypromellose	981	hypromellose	1140875990	S01KA02	Hypromellose	FALSE	TRUE
680	dipyridamole	965	dipyridamole	1140861778	B01AC07	Dipyridamole	FALSE	TRUE
681	calcium carbonate+cholecalciferol 1.25g/200iu tablet	952	calcium carbonate+cholecalciferol 1.25g/200iu tablet	1141146606	A12AX	Cholecalciferol |Calcium Carbonate	FALSE	TRUE
682	salmeterol+fluticasone propionate	952	salmeterol+fluticasone propionate	1141164086	R03AK06	Salmeterol |Fluticasone Propionate	FALSE	TRUE
683	flecainide	939	flecainide	1140888570	C01BC04	Flecainide	FALSE	TRUE
684	elleste-solo 1mg tablet	913	elleste-solo 1mg tablet	1140923852	G03CA03	Estradiol	FALSE	TRUE
685	st john's wort/hypericum [ctsu]	898	st john's wort/hypericum [ctsu]	1201	N06AX25	St. John'S Wort	FALSE	TRUE
686	flixotide 25micrograms inhaler	885	flixotide 25micrograms inhaler	1140864286	R03BA05	Fluticasone Propionate	FALSE	TRUE
687	diprobase cream	879	diprobase cream	1140878226	D02AX	No Active Ingredients	FALSE	TRUE
688	imigran 50mg tablet	863	imigran 50mg tablet	1140911658	N02CC01	Sumatriptan	FALSE	TRUE
689	femoston 1/10 tablet	856	femoston 1/10 tablet	1140922562	G03FB08	Dydrogesterone |Estradiol	FALSE	TRUE
690	mirena 52mg intrauterine system	854	mirena 52mg intrauterine system	1140921814	G02BA03	Levonorgestrel	FALSE	TRUE
691	flax oil tablet	847	flax oil tablet	1140911730	A06AC05	Linseed Oil	FALSE	TRUE
692	evorel 25 patch	835	evorel 25 patch	1140916790	G03CA03	Estradiol	FALSE	TRUE
693	lacri-lube eye ointment	812	lacri-lube eye ointment	1140881472	S01XA20	No Active Ingredients	FALSE	TRUE
694	piriton 4mg tablet	805	piriton 4mg tablet	1140862628	R06AB04	Chlorphenamine	FALSE	TRUE
695	detrusitol 1mg tablet	798	detrusitol 1mg tablet	1141162824	G04BD07	Tolterodine	FALSE	TRUE
696	pizotifen	789	pizotifen	1140883664	N02CX01	Pizotifen	FALSE	TRUE
697	terbutaline	789	terbutaline	1140879792	R03AC03 |R03CC03	Terbutaline	FALSE	TRUE
698	fybogel mebeverine sachet	782	fybogel mebeverine sachet	1140865350	A06AC51	Mebeverine |Plantago Seed	FALSE	TRUE
699	prempak 0.625 tablet	780	prempak 0.625 tablet	1140857636	G03FA10	Conjugated Estrogens |Norgestrel	FALSE	TRUE
700	estraderm mx 25 patch	776	estraderm mx 25 patch	1140926592	G03CA03	Estradiol	FALSE	TRUE
701	starflower oil	771	starflower oil	1140911680	D11AX02	Gamolenic Acid	FALSE	TRUE
702	spiriva 18micrograms inhalation capsule	765	spiriva 18micrograms inhalation capsule	1141182632	R03BB04	Tiotropium	FALSE	TRUE
703	co-tenidone	759	co-tenidone	1140923336	C07CB03	Chlorthalidone |Atenolol	FALSE	TRUE
704	rosiglitazone	759	rosiglitazone	1141177600	A10BG02	Rosiglitazone	FALSE	TRUE
705	mirena 20mcg/24hrs intrauterine system	753	mirena 20mcg/24hrs intrauterine system	1140921822	G02BA03	Levonorgestrel	FALSE	TRUE
706	thiamine preparation	749	thiamine preparation	1140888366	A11DA01	Thiamine	FALSE	TRUE
707	microgynon 30 tablet	746	microgynon 30 tablet	1140869180	G03AA07	Levonorgestrel |Ethinyl Estradiol	FALSE	TRUE
708	prochlorperazine	743	prochlorperazine	1140868170	N05AB04	Prochlorperazine	FALSE	TRUE
709	ginseng product	738						TRUE
710	arthrotec tablet	735	arthrotec tablet	1140871266	M01AB55	Diclofenac |Misoprostol	FALSE	TRUE
711	micronor tablet	731	micronor tablet	1140869276	G03AC01	Norethisterone	FALSE	TRUE
712	trazodone	730	trazodone	1140879634	N06AX05	Trazodone	FALSE	TRUE
713	tranexamic acid	695	tranexamic acid	1140861832	B02AA02	Tranexamic Acid	FALSE	TRUE
714	omacor 1g capsule	682	omacor 1g capsule	1141181868	C10AX06	Omega-3-Acid Ethyl Esters	FALSE	TRUE
715	clonidine	673	clonidine	1140883468	C02AC01 |N02CX02 |S01EA04	Clonidine	FALSE	TRUE
716	selenium ace tablet	672	selenium ace tablet	1140911682	A11JC	Vitamin C |Vitamin A |Selenium |Vitamin E	FALSE	TRUE
717	migraleve tablet	670	migraleve tablet	1141168554	N02AJ09	Acetaminophen |Codeine |Buclizine	FALSE	TRUE
718	climaval 1mg tablet	652	climaval 1mg tablet	1140868372	G03CA03	Estradiol	FALSE	TRUE
719	olanzapine	649	olanzapine	1140928916	N05AH03	Olanzapine	FALSE	TRUE
720	olmesartan	642	olmesartan	1141193282	C09CA08	Olmesartan	FALSE	TRUE
721	metoclopramide	627	metoclopramide	1140879494	A03FA01	Metoclopramide	FALSE	TRUE
722	dovobet ointment	622	dovobet ointment	1141179992	D05AX52	Betamethasone |Calcipotriol	FALSE	TRUE
723	evorel conti patch	620	evorel conti patch	1141151718	G03FA01	Norethisterone |Estradiol	FALSE	TRUE
724	ipratropium	618	ipratropium	1140883548	R01AX03 |R03BB01	Ipratropium Bromide	FALSE	TRUE
725	vitamin b6 preparation	603	vitamin b6 preparation	1140909874	A11HA02	Vitamin B6	FALSE	TRUE
726	saw palmetto product	587						TRUE
727	lacidipine	583	lacidipine	1140861276	C08CA09	Lacidipine	FALSE	TRUE
728	eumovate cream	564	eumovate cream	1140882800	D07AB01	Clobetasone	FALSE	TRUE
729	buscopan 10mg tablet	549	buscopan 10mg tablet	1140865396	A03BB01	Scopolamine Butylbromide	FALSE	TRUE
730	trimethoprim	549	trimethoprim	1140873966	J01EA01	Trimethoprim	FALSE	TRUE
731	calcichew forte 2.5g chewable tablet	539	calcichew forte 2.5g chewable tablet	1140870862	A12AA04	Calcium Carbonate	FALSE	TRUE
732	bezafibrate	537	bezafibrate	1140861924	C10AB02	Bezafibrate	FALSE	TRUE
733	atrovent 20micrograms inhaler	526	atrovent 20micrograms inhaler	1140862236	R03BB01	Ipratropium Bromide	FALSE	TRUE
734	lithium product	523	lithium product	1140867490	N05AN01	Lithium	FALSE	TRUE
735	aloe vera product	508						TRUE
736	co-amilofruse	507	co-amilofruse	1140923402	C03EB01	Amiloride |Furosemide	FALSE	TRUE
737	cosopt 2%/0.5% eye drops	502	cosopt 2%/0.5% eye drops	1141169520	S01ED51	Timolol |Dorzolamide	FALSE	TRUE
738	ispaghula husk	498	ispaghula husk	1140865752	A06AC01	Plantago Seed	FALSE	TRUE
739	antihistamine 60mg tablet	496						TRUE
740	ibandronic acid	492	ibandronic acid	1141180314	M05BA06	Ibandronate	FALSE	TRUE
741	peptac liquid	488	peptac liquid	1141168752	A02AX	Sodium Bicarbonate |Calcium Carbonate |Alginic Acid	FALSE	TRUE
742	carbomers	488						TRUE
743	aqueous cream bp	481	aqueous cream bp	1140876404	D02A	No Active Ingredients	FALSE	TRUE
744	losartan potassium+hydrochlorothiazide 50mg/12.5mg tablet	480	losartan potassium+hydrochlorothiazide 50mg/12.5mg tablet	1141151016	C09DA01	Losartan |Hydrochlorothiazide	FALSE	TRUE
745	nebivolol	468	nebivolol	1141164276	C07AB12	Nebivolol	FALSE	TRUE
746	aciclovir	463	aciclovir	1140874370	D06BB03 |J05AB01 |S01AD03	Aciclovir	FALSE	TRUE
747	hydroxocobalamin	463	hydroxocobalamin	1141173348	B03BA03 |V03AB33	Hydroxocobalamin	FALSE	TRUE
748	b12 - hydroxocobalamin prep	454	b12 - hydroxocobalamin prep	1140910494	B03BA03 |V03AB33	Hydroxocobalamin	TRUE	TRUE
749	celluvisc 1% single-use eye drops	452	celluvisc 1% single-use eye drops	1141172918	S01XA20	Carboxymethylcellulose	FALSE	TRUE
750	colpermin 0.2ml m/r gel e/c capsule	450						TRUE
751	sodium cromoglicate	448	sodium cromoglicate	1140909788	A07EB01 |D11AH03 |R01AC01 |R03BC01 |S01GX01	Cromoglicic Acid	FALSE	TRUE
752	bumetanide	441	bumetanide	1140866280	C03CA02	Bumetanide	FALSE	TRUE
753	arthrotec 50 tablet	439	arthrotec 50 tablet	1140927086	M01AB55	Diclofenac |Misoprostol	FALSE	TRUE
754	rizatriptan	432	rizatriptan	1141167932	N02CC04	Rizatriptan	FALSE	TRUE
755	lumigan 0.3mg/ml eye drops	425	lumigan 0.3mg/ml eye drops	1141179920	S01EE03	Bimatoprost	FALSE	TRUE
756	bimatoprost	422	bimatoprost	1141179914	S01EE03	Bimatoprost	TRUE	TRUE
757	e45 cream	418	e45 cream	1140878304	D02AC	Petrolatum |Lanolin |Light Mineral Oil	FALSE	TRUE
758	actonel 5mg tablet	417	actonel 5mg tablet	1141175690	M05BA07	Risedronate	FALSE	TRUE
759	co-proxamol	414	co-proxamol	1140923348	N02AC54	Acetaminophen |Dextropropoxyphene	FALSE	TRUE
760	kliofem tablet	412	kliofem tablet	1140917056	G03FA01	Norethisterone |Estradiol	FALSE	TRUE
761	paracetamol + codeine	411	paracetamol + codeine	1140882394	N02AJ06	Acetaminophen |Codeine	FALSE	TRUE
762	luteine	410	luteine	1140910640	V06D	Xanthophyll	FALSE	TRUE
763	cimetidine	405	cimetidine	1140865426	A02BA01	Cimetidine	FALSE	TRUE
764	lofepramine	405	lofepramine	1140867726	N06AA07	Lofepramine	FALSE	TRUE
765	naratriptan	401	naratriptan	1141151284	N02CC02	Naratriptan	FALSE	TRUE
766	ortho-gynest 500micrograms pessary	399	ortho-gynest 500micrograms pessary	1140869034	G03CA04	Estriol	FALSE	TRUE
767	calcium carbonate+colecalciferol 1.25g/5micrograms tablet	396	calcium carbonate+colecalciferol 1.25g/5micrograms tablet	1141180936	A12AX	Cholecalciferol |Calcium Carbonate	FALSE	TRUE
768	solpadol caplet	395	solpadol caplet	1140871688	N02AJ06	Acetaminophen |Codeine	FALSE	TRUE
769	etodolac	394	etodolac	1140871188	M01AB08	Etodolac	FALSE	TRUE
770	femulen tablet	390	femulen tablet	1140869362	G03DC06	Ethynodiol Diacetate	FALSE	TRUE
771	ropinirole	389	ropinirole	1140928274	N04BC04	Ropinirole	FALSE	TRUE
772	bisoprolol fumarate+hydrochlorothiazide 10mg/6.25mg tablet	387	bisoprolol fumarate+hydrochlorothiazide 10mg/6.25mg tablet	1140864950	C07BB07	Bisoprolol |Hydrochlorothiazide	FALSE	TRUE
773	erythromycin	385	erythromycin	1140873608	D10AF02 |J01FA01 |S01AA17	Erythromycin	FALSE	TRUE
774	beclometasone dipropionate+salbutamol	384	beclometasone dipropionate+salbutamol	1141180342	R03AK13	Beclomethasone Dipropionate |Salbutamol	FALSE	TRUE
775	ovestin 0.1% vaginal cream	383	ovestin 0.1% vaginal cream	1140869036	G03CA04	Estriol	FALSE	TRUE
776	noriday tablet	381	noriday tablet	1140869278	G03DC02	Norethisterone	FALSE	TRUE
777	hydrocortisone product	378	hydrocortisone product	1141157294	A01AC03 |A07EA02 |C05AA01 |D07AA02 |D07XA01 |H02AB09 |S01BA02 |S01CB03 |S02BA01	Hydrocortisone	FALSE	TRUE
778	anadin tablet	375	anadin tablet	1140911754	N02BA51	Caffeine |Acetylsalicylic Acid	FALSE	TRUE
779	syndol tablet	374	syndol tablet	1140856342	N02AJ06	Acetaminophen |Codeine |Ketorolac	FALSE	TRUE
780	budesonide+formoterol	367	budesonide+formoterol	1141195232	R03AK07	Formoterol |Budesonide	FALSE	TRUE
781	buprenorphine	362	buprenorphine	1140871732	N02AE01 |N07BC01	Buprenorphine	FALSE	TRUE
782	naramig 2.5mg tablet	355	naramig 2.5mg tablet	1141151288	N02CC02	Naratriptan	FALSE	TRUE
783	prednisone	353	prednisone	1140868364	A07EA03 |H02AB07	Prednisone	FALSE	TRUE
784	clomipramine	352	clomipramine	1140879620	N06AA04	Clomipramine	FALSE	TRUE
785	daktacort cream	351	daktacort cream	1140882910	D01AC20	Hydrocortisone |Miconazole	FALSE	TRUE
786	calceos chewable tablet	348	calceos chewable tablet	1141146612	A12AX	Cholecalciferol |Calcium Carbonate	FALSE	TRUE
787	opticrom allergy eye drops	346	opticrom allergy eye drops	1140909482	S01GX01	Cromoglicic Acid	FALSE	TRUE
788	diclofenac sodium+misoprostol	346	diclofenac sodium+misoprostol	1140878036	M01AB55	Diclofenac |Misoprostol	FALSE	TRUE
789	raloxifene hydrochloride	345	raloxifene hydrochloride	1141168574	G03XC01	Raloxifene	FALSE	TRUE
790	iron+folic acid	342	iron+folic acid	1140870306	B03AD	Folic Acid |Iron	FALSE	TRUE
791	indometacin	341	indometacin	1140909936	C01EB03 |M01AB01 |M02AA23 |S01BC01	Indomethacin	FALSE	TRUE
792	carbocisteine	340	carbocisteine	1140862944	R05CB03	Carbocisteine	FALSE	TRUE
793	priadel 200mg m/r tablet	336	priadel 200mg m/r tablet	1140867504	N05AN01	Lithium	FALSE	TRUE
794	penicillin	334	penicillin	1140882498	J01CE |S01AA14	Phenoxymethylpenicillin |Benzylpenicillin |Procaine Benzylpenicillin |Benzathine Benzylpenicillin	FALSE	TRUE
795	morphine	329	morphine	1140871692	N02AA01	Morphine	FALSE	TRUE
796	stemetil 5mg tablet	329	stemetil 5mg tablet	1140868172	N05AB04	Prochlorperazine	FALSE	TRUE
797	calcipotriol	328	calcipotriol	1140880086	D05AX02	Calcipotriol	FALSE	TRUE
798	epaderm ointment	326						TRUE
799	trimovate ointment	323	trimovate ointment	1140884700	D07CB	Oxytetracycline |Nystatin |Clobetasone	FALSE	TRUE
800	doublebase gel	318	doublebase gel	1141174032	D02A	Mineral Oil |Isopropyl Myristate	FALSE	TRUE
801	olmetec 10mg tablet	312	olmetec 10mg tablet	1141193346	C09CA08	Olmesartan	FALSE	TRUE
802	trandolapril	312	trandolapril	1140860904	C09AA10	Trandolapril	FALSE	TRUE
803	nitrazepam	310	nitrazepam	1140863182	N05CD02	Nitrazepam	FALSE	TRUE
804	chlorphenamine	308	chlorphenamine	1140909790	R06AB04	Chlorphenamine	FALSE	TRUE
805	co-amilozide	306	co-amilozide	1140923276	C03EA01	Amiloride |Hydrochlorothiazide	FALSE	TRUE
806	lymecycline	306	lymecycline	1140873474	J01AA04	Lymecycline	FALSE	TRUE
807	eprosartan	305	eprosartan	1141171336	C09CA02	Eprosartan	FALSE	TRUE
808	indomethacin	305	indomethacin	1140871336	C01EB03 |M01AB01 |M02AA23 |S01BC01	Indomethacin	FALSE	TRUE
809	persantin 25mg tablet	304	persantin 25mg tablet	1140861780	B01AC07	Dipyridamole	FALSE	TRUE
810	norethisterone	300	norethisterone	1140868580	G03AC01 |G03DC02	Norethisterone	FALSE	TRUE
811	ismn - isosorbide mononitrate	299	ismn - isosorbide mononitrate	1140888762	C01DA14	Isosorbide Mononitrate	FALSE	TRUE
812	oestrogen product	296	oestrogen product	1140884622	G03CA03	Estradiol	FALSE	TRUE
813	kelp+garlic product	295						TRUE
814	cefalexin	291	cefalexin	1141180392	J01DB01	Cephalexin	FALSE	TRUE
815	creon e/c granules in capsule	290	creon e/c granules in capsule	1140866026	A09AA02	Pancrelipase	FALSE	TRUE
816	solpadol capsule	286	solpadol capsule	1141168122	N02AJ06	Acetaminophen |Codeine	FALSE	TRUE
817	hypromellose product	286	hypromellose product	1141157458	S01KA02	Hypromellose	FALSE	TRUE
818	climagest 1mg tablet	281	climagest 1mg tablet	1140864196	G03FB05	Norethisterone |Estradiol	FALSE	TRUE
819	xalacom 0.005%/0.5% eye drops	278	xalacom 0.005%/0.5% eye drops	1141184726	S01ED51	Timolol |Latanoprost	FALSE	TRUE
820	lecithin product	277						TRUE
821	dovonex 50micrograms/g cream	276	dovonex 50micrograms/g cream	1140864184	D05AX02	Calcipotriol	FALSE	TRUE
822	cinnarizine	275	cinnarizine	1140883524	N07CA02	Cinnarizine	FALSE	TRUE
823	estriol product	271	estriol product	1141181594	G03CA04	Estradiol	FALSE	TRUE
824	otomize ear spray	266	otomize ear spray	1140882728	S02CA06	Neomycin |Dexamethasone |Acetic Acid	FALSE	TRUE
825	azopt 10mg/ml eye drops	265	azopt 10mg/ml eye drops	1141176288	S01EC04	Brinzolamide	FALSE	TRUE
826	carmellose	265	carmellose	1140883968	S01XA20	Carboxymethylcellulose	FALSE	TRUE
827	imodium 2mg capsule	262	imodium 2mg capsule	1140865564	A07DA03	Loperamide	FALSE	TRUE
828	pramipexole	261	pramipexole	1141164060	N04BC05	Pramipexole	FALSE	TRUE
829	penicillin v	259	penicillin v	1140888758	J01CE02	Phenoxymethylpenicillin	FALSE	TRUE
830	peppermint oil product	258						TRUE
831	fucibet cream	257	fucibet cream	1140882776	D07CC01	Betamethasone |Fusidic Acid	FALSE	TRUE
832	calcium+ergocalciferol tablet	257	calcium+ergocalciferol tablet	1140877630	A12AX	Ergocalciferol |Calcium	FALSE	TRUE
833	trospium	254	trospium	1141171496	G04BD09	Trospium	FALSE	TRUE
834	maxalt 5mg tablet	252	maxalt 5mg tablet	1141167940	N02CC04	Rizatriptan	FALSE	TRUE
835	uniphyllin continus 200mg m/r tablet	252	uniphyllin continus 200mg m/r tablet	1140862438	R03DA04	Theophylline	FALSE	TRUE
836	brinzolamide	248	brinzolamide	1141176284	S01EC04	Brinzolamide	FALSE	TRUE
837	allergy relief antihistamine 4mg tablet	246	allergy relief antihistamine 4mg tablet	1141194224	R06AB04	Chlorphenamine	FALSE	TRUE
838	tylex capsule	240	tylex capsule	1140871680	N02AJ06	Acetaminophen |Codeine	FALSE	TRUE
839	captopril	235	captopril	1140860750	C09AA01	Captopril	FALSE	TRUE
840	hydroxycarbamide	234	hydroxycarbamide	1141195044	L01XX05	Hydroxyurea	FALSE	TRUE
841	senokot 7.5mg tablet	233	senokot 7.5mg tablet	1140851088	A06AB06	Senna Glycoside	FALSE	TRUE
842	normacol granules	233	normacol granules	1140881474	A06AC03	Sterculia	FALSE	TRUE
843	dexamethasone+hypromellose 0.1%/0.5% eye drops	232	dexamethasone+hypromellose 0.1%/0.5% eye drops	1141169844	S02BA06	Dexamethasone |Hypromellose	FALSE	TRUE
844	hormonin tablet	232	hormonin tablet	1140868458	G03CA53	Estrone |Estradiol |Estriol	FALSE	TRUE
845	diprosalic ointment	231	diprosalic ointment	1140882618	D07XC01	Betamethasone |Salicylic Acid	FALSE	TRUE
846	quinapril	225	quinapril	1140860728	C09AA06	Quinapril	FALSE	TRUE
847	calcium carbonate+cholecalciferol 1.25g/5micrograms tablet	224	calcium carbonate+cholecalciferol 1.25g/5micrograms tablet	1140871052	A12AX	Cholecalciferol |Calcium Carbonate	FALSE	TRUE
848	nabumetone	223	nabumetone	1140875336	M01AX01	Nabumetone	FALSE	TRUE
849	oilatum cream	222	oilatum cream	1140878324	D02AC	Petrolatum |Light Mineral Oil	FALSE	TRUE
850	nasacort 55micrograms aqueous nasal spray	222	nasacort 55micrograms aqueous nasal spray	1141146508	R01AD11	Triamcinolone	FALSE	TRUE
851	femseven 50 patch	221	femseven 50 patch	1140923738	G03CA03	Estradiol	FALSE	TRUE
852	rosiglitazone 1mg / metformin 500mg tablet	221	rosiglitazone 1mg / metformin 500mg tablet	1141189090	A10BD03	Metformin |Rosiglitazone	FALSE	TRUE
853	lodine 200mg tablet	219	lodine 200mg tablet	1140871196	M01AB08	Etodolac	FALSE	TRUE
854	progynova 1mg tablet	216	progynova 1mg tablet	1140868460	G03CA03	Estradiol	FALSE	TRUE
855	loestrin 20 tablet	216	loestrin 20 tablet	1140869324	G03AA05	Norethisterone |Ethinyl Estradiol	FALSE	TRUE
856	zapain caplet	215	zapain caplet	1141178052	N02AJ06	Acetaminophen |Codeine	FALSE	TRUE
857	liquifilm tears 1.4% eye drops	215	liquifilm tears 1.4% eye drops	1140878186	S01XA20	Polyvinyl Alcohol	FALSE	TRUE
858	amiloride	213	amiloride	1140888512	C03DB01	Amiloride	FALSE	TRUE
859	minocycline	212	minocycline	1140873480	A01AB23 |J01AA08	Minocycline	FALSE	TRUE
860	vitamin b1 preparation	211	vitamin b1 preparation	1140909872	A11DA	Thiamine	FALSE	TRUE
861	isotard 25xl m/r tablet	210	isotard 25xl m/r tablet	1141168108	C01DA14	Isosorbide Mononitrate	FALSE	TRUE
862	nuvelle tablet	210	nuvelle tablet	1140868518	G03FB05	Levonorgestrel |Estradiol	FALSE	TRUE
863	cyclizine	208	cyclizine	1140868080	R06AE03	Cyclizine	FALSE	TRUE
864	metronidazole	206	metronidazole	1140874014	A01AB17 |D06BX01 |G01AF01 |J01XD01 |P01AB01	Metronidazole	FALSE	TRUE
865	proctosedyl ointment	205	proctosedyl ointment	1140881446	A07EA02	Cinchocaine |Hydrocortisone	FALSE	TRUE
866	avandamet 1mg / 500mg tablet	205	avandamet 1mg / 500mg tablet	1141189094	A10BD03	Metformin |Rosiglitazone	FALSE	TRUE
867	logynon tablet	201	logynon tablet	1140869176	G03AA07	Levonorgestrel |Ethinyl Estradiol	FALSE	TRUE
868	tetralysal 300 capsule	201	tetralysal 300 capsule	1140873476	J01AA04	Lymecycline	FALSE	TRUE
869	nicotine product	198	nicotine product	1140872492	N07BA01	Nicotine	FALSE	TRUE
870	flucloxacillin	197	flucloxacillin	1140872694	J01CF05	Flucloxacillin	FALSE	TRUE
871	climesse tablet	197	climesse tablet	1140926430	G03FB05	Norethisterone |Estradiol	FALSE	TRUE
872	progesterone product	194	progesterone product	1140868588	G03DA04	Progesterone	FALSE	TRUE
873	magnesium citrate	190	magnesium citrate	1140865872	A06AD19 |A12CC04 |B05CB03	Magnesium Citrate	FALSE	TRUE
874	senna product	190	senna product	1141157178	A06AB06	Senna Glycoside	FALSE	TRUE
875	phyllocontin continus 225mg m/r tablet	189	phyllocontin continus 225mg m/r tablet	1140862266	R03DA05	Aminophylline	FALSE	TRUE
876	imdur 60mg durule	189	imdur 60mg durule	1140860976	C01DA14	Isosorbide Mononitrate	FALSE	TRUE
877	triamcinolone	188	triamcinolone	1140868426	A01AC01 |C05AA12 |D07AB09 |D07XB02 |H02AB08 |R01AD11 |R03BA06 |S01BA05	Triamcinolone	FALSE	TRUE
878	azithromycin	187	azithromycin	1140873642	J01FA10 |S01AA26	Azithromycin	FALSE	TRUE
879	terazosin	186	terazosin	1140879798	G04CA03	Terazosin	FALSE	TRUE
880	lisinopril+hydrochlorothiazide 10mg/12.5mg tablet	185	lisinopril+hydrochlorothiazide 10mg/12.5mg tablet	1140864952	C09BA03	Lisinopril |Hydrochlorothiazide	FALSE	TRUE
881	codeine phosphate+kaolin 10mg/3g/10ml mixture	182	codeine phosphate+kaolin 10mg/3g/10ml mixture	1140865654	N02AA59	Codeine |Kaolin	FALSE	TRUE
882	lorazepam	182	lorazepam	1140863302	N05BA06	Lorazepam	FALSE	TRUE
883	cilest tablet	182	cilest tablet	1140869346	G03AA11	Norgestimate |Ethinyl Estradiol	FALSE	TRUE
884	piroxicam	182	piroxicam	1140871666	M01AC01 |M02AA07 |S01BC06	Piroxicam	FALSE	TRUE
885	movelat gel	182	movelat gel	1140875632	M02AC	Salicylic Acid |Mucopolysaccharide Polysulfate	FALSE	TRUE
886	chlorpromazine	181	chlorpromazine	1140879658	N05AA01	Chlorpromazine	FALSE	TRUE
887	tenofovir	180	tenofovir	1141179764	J05AF	Tenofovir	FALSE	TRUE
888	mucodyne 375mg capsule	179	mucodyne 375mg capsule	1140862952	R05CB03	Carbocisteine	FALSE	TRUE
889	premique cycle 10mg tablet	179	premique cycle 10mg tablet	1140922806	G03FB06	Medroxyprogesterone Acetate |Estradiol	FALSE	TRUE
890	clobetasone	178	clobetasone	1140884696	D07AB01 |S01BA09	Clobetasone	FALSE	TRUE
891	dothiepin	178	dothiepin	1140879628	N06AA16	Dosulepin	FALSE	TRUE
892	implanon 68mg subdermal implant	177	implanon 68mg subdermal implant	1141166200	G03AC08	Etonogestrel	FALSE	TRUE
893	ismo - isosorbide mononitrate	177	ismo - isosorbide mononitrate	1140910512	C01DA14	Isosorbide Mononitrate	FALSE	TRUE
894	manevac granules	177	manevac granules	1140879392	A06AC51	Senna Glycoside |Plantago Seed	FALSE	TRUE
895	paramax tablet	176	paramax tablet	1140872036	N02BE51	Acetaminophen |Metoclopramide	FALSE	TRUE
896	magnesium carbonate	176	magnesium carbonate	1140881320	A02AA01 |A06AD01	Magnesium Carbonate	FALSE	TRUE
897	flu - influenza vaccine	175	flu - influenza vaccine	1140910498	J07BB	Influenza Vaccine	FALSE	TRUE
898	sinemet-62.5 tablet	175	sinemet-62.5 tablet	1141164872	N04BA02	Levodopa |Carbidopa	FALSE	TRUE
899	tramacet 325mg/37.5mg tablet	172	tramacet 325mg/37.5mg tablet	1141190960	N02AJ13	Tramadol |Acetaminophen	FALSE	TRUE
900	dermol 500 lotion	170	dermol 500 lotion	1140927320	D08A	Chlorhexidine |Benzalkonium	FALSE	TRUE
901	zumenon 1mg tablet	169	zumenon 1mg tablet	1140928878	G03CA03	Estradiol	FALSE	TRUE
902	rennie duo oral suspension	168	rennie duo oral suspension	1141166086	A02AC01	Calcium Carbonate	FALSE	TRUE
903	forceval capsule	167	forceval capsule	1140870488	A11AA	Mineral |Multivitamin	FALSE	TRUE
904	oil of peppermint	167						TRUE
905	zimovane ls 3.75mg tablet	166	zimovane ls 3.75mg tablet	1140928004	N05CF01	Zopiclone	FALSE	TRUE
906	coaprovel 150mg/12.5mg tablet	165	coaprovel 150mg/12.5mg tablet	1141172686	C09DA04	Hydrochlorothiazide |Irbesartan	FALSE	TRUE
907	didronel 200mg tablet	164	didronel 200mg tablet	1140868772	M05BA01	Etidronic Acid	FALSE	TRUE
908	hyoscine butylbromide	162	hyoscine butylbromide	1140865394	A03BB01	Scopolamine Butylbromide	FALSE	TRUE
909	madopar 62.5 capsule	161	madopar 62.5 capsule	1140872338	N04BA02	Levodopa |Benserazide	FALSE	TRUE
910	ispaghula husk product	161	ispaghula husk product	1141157494	A06AC01	Plantago Seed	FALSE	TRUE
911	pyridoxine preparation	161	pyridoxine preparation	1140888362	A11HA02	Pyridoxine	FALSE	TRUE
912	questran 4g/sachet powder	157	questran 4g/sachet powder	1140861936	C10AC01	Cholestyramine	FALSE	TRUE
913	strontium product	157						TRUE
914	mercilon tablet	156	mercilon tablet	1140869164	G03AA09	Desogestrel |Ethinyl Estradiol	FALSE	TRUE
915	indivina 1mg/2.5mg tablet	155	indivina 1mg/2.5mg tablet	1141172436	G03FA12	Medroxyprogesterone Acetate |Estradiol	FALSE	TRUE
916	norgeston tablet	154	norgeston tablet	1140869370	G03AC03	Levonorgestrel	FALSE	TRUE
917	oestrogel 0.06% gel	153	oestrogel 0.06% gel	1141167206	G03CA03	Estradiol	FALSE	TRUE
918	ketoprofen	153	ketoprofen	1140871506	M01AE03 |M02AA10	Ketoprofen	FALSE	TRUE
919	phenobarbitone	152	phenobarbitone	2038460068	N03AA02	Phenobarbital	FALSE	TRUE
920	merbentyl 10mg tablet	151	merbentyl 10mg tablet	1140865382	A03AA07	Dicyclomine	FALSE	TRUE
921	tears naturale eye drops	148	tears naturale eye drops	1140878172	S01XA20	Hypromellose |Dextran 70	FALSE	TRUE
922	reductil 10mg capsule	148	reductil 10mg capsule	1141174508	A08AA10	Sibutramine	FALSE	TRUE
923	gamolenic acid	147	gamolenic acid	1140880072	D11AX02	Gamolenic Acid	FALSE	TRUE
924	evista 60mg tablet	147	evista 60mg tablet	1141168578	G03XC01	Raloxifene	FALSE	TRUE
925	monomax xl 60mg m/r tablet	146	monomax xl 60mg m/r tablet	1141172698	C01DA14	Isosorbide Mononitrate	FALSE	TRUE
926	celiprolol	145	celiprolol	1140879762	C07AB08	Celiprolol	FALSE	TRUE
927	oramorph 10mg/5ml oral solution	145	oramorph 10mg/5ml oral solution	1140882272	N02AA01	Morphine	FALSE	TRUE
928	tetracycline	144	tetracycline	1140873450	A01AB13 |D06AA04 |J01AA07 |S01AA09 |S02AA08 |S03AA02	Tetracycline	FALSE	TRUE
929	clobetasol	143	clobetasol	1140888074	D07AD01	Clobetasol	FALSE	TRUE
930	sodium cromoglycate	143	sodium cromoglycate	1140862526	A07EB01 |D11AH03 |R01AC01 |R03BC01 |S01GX01	Cromoglicic Acid	FALSE	TRUE
931	menophase tablet	143						TRUE
932	enalapril maleate+hydrochlorothiazide 20mg/12.5mg tablet	140	enalapril maleate+hydrochlorothiazide 20mg/12.5mg tablet	1140860790	C09BA02	Enalapril |Hydrochlorothiazide	FALSE	TRUE
933	oestradiol product	140	oestradiol product	1140868456	G03CA03	Estradiol	FALSE	TRUE
934	anusol cream	138	anusol cream	1140865816	C05AX	Zinc Oxide |Bismuth Subsalicylate |Balsam Of Peru	FALSE	TRUE
935	mirapexin 0.088mg tablet	137	mirapexin 0.088mg tablet	1141164068	N04BC05	Pramipexole	FALSE	TRUE
936	asasantin retard m/r capsule	136	asasantin retard m/r capsule	1141167848	B01AC30	Acetylsalicylic Acid |Dipyridamole	FALSE	TRUE
937	canesten 1% cream	136	canesten 1% cream	1140878530	D01AC01	Clotrimazole	FALSE	TRUE
938	irbesartan+hydrochlorothiazide 150mg/12.5mg tablet	136	irbesartan+hydrochlorothiazide 150mg/12.5mg tablet	1141172682	C09DA04	Hydrochlorothiazide |Irbesartan	FALSE	TRUE
939	salbutamol+ipratropium 100micrograms/20micrograms inhaler	136	salbutamol+ipratropium 100micrograms/20micrograms inhaler	1140864966	R03AL02	Ipratropium Bromide |Salbutamol	FALSE	TRUE
940	cozaar-comp 50mg/12.5mg tablet	136	cozaar-comp 50mg/12.5mg tablet	1141151018	C09DA01	Losartan |Hydrochlorothiazide	FALSE	TRUE
941	nefopam	136	nefopam	1140884560	N02BG06	Nefopam	FALSE	TRUE
942	phenobarbital	135	phenobarbital	1140910706	N03AA02	Phenobarbital	FALSE	TRUE
943	synalar 1:10 cream	133	synalar 1:10 cream	1140913292	D07AC04	Fluocinolone Acetonide	FALSE	TRUE
944	sno-tears eye drops	133	sno-tears eye drops	1140878184	S01XA20	Polyvinyl Alcohol	FALSE	TRUE
945	clotrimazole	132	clotrimazole	1140880288	A01AB18 |D01AC01 |G01AF02	Clotrimazole	FALSE	TRUE
946	oxycodone hydrochloride	132	oxycodone hydrochloride	1141171038	N02AA05	Oxycodone	FALSE	TRUE
947	co-careldopa	131	co-careldopa	1140882112	N04BA02	Levodopa |Carbidopa	FALSE	TRUE
948	chlorpheniramine	130	chlorpheniramine	1140883520	R06AB04	Chlorphenamine	FALSE	TRUE
949	capasal shampoo	130	capasal shampoo	1140878512	D05AA	Salicylic Acid |Coal Tar |Coconut Oil	FALSE	TRUE
950	kapake tablet	129	kapake tablet	1140864070	N02AJ06	Acetaminophen |Codeine	FALSE	TRUE
951	solpadeine capsule	129	solpadeine capsule	1141168650	N02AJ06	Caffeine |Acetaminophen |Codeine	FALSE	TRUE
952	fentanyl	129	fentanyl	1140880956	N01AH01 |N02AB03	Fentanyl	FALSE	TRUE
953	dixarit 25mcg tablet	128	dixarit 25mcg tablet	1140871984	N02CX02	Clonidine	FALSE	TRUE
954	desmopressin	128	desmopressin	1140868816	H01BA02	Desmopressin	FALSE	TRUE
955	nedocromil	128	nedocromil	1140883706	R01AC07 |R03BC03 |S01GX04	Nedocromil	FALSE	TRUE
956	buccastem 3mg tablet	128	buccastem 3mg tablet	1140868192	N05AB04	Prochlorperazine	FALSE	TRUE
957	amitriptyline hydrochloride+perphenazine 10mg/2mg tablet	127	amitriptyline hydrochloride+perphenazine 10mg/2mg tablet	1140867948	N06CA01	Amitriptyline |Perphenazine	FALSE	TRUE
958	indoramin	127	indoramin	1140879782	C02CA02	Indoramin	FALSE	TRUE
959	almotriptan	124	almotriptan	1141172728	N02CC05	Almotriptan	FALSE	TRUE
960	beclomethasone dipropionate+salbutamol	124	beclomethasone dipropionate+salbutamol	1140881938	R03AK13	Beclomethasone Dipropionate |Salbutamol	FALSE	TRUE
961	cetraben cream	123	cetraben cream	1141173872	D02AX	Glycerin |Petrolatum |Light Mineral Oil	FALSE	TRUE
962	migril tablet	122	migril tablet	1140872058	N02CA52	Caffeine |Ergotamine |Cyclizine	FALSE	TRUE
963	hydroxocobalamin product	122	hydroxocobalamin product	1140870504	B03BA03 |V03AB33	Hydroxocobalamin	FALSE	TRUE
964	berocca effervescent tablet	122	berocca effervescent tablet	1141188210	A11AA	Mineral |Multivitamin	FALSE	TRUE
965	phenoxymethylpenicillin	122	phenoxymethylpenicillin	1140872590	J01CE02	Phenoxymethylpenicillin	FALSE	TRUE
966	bendroflumethiazide+potassium 2.5mg/7.7mmol m/r tablet	121	bendroflumethiazide+potassium 2.5mg/7.7mmol m/r tablet	1141194800	C03AB01	Bendroflumethiazide |Potassium	FALSE	TRUE
967	marvelon tablet	121	marvelon tablet	1140869162	G03AA09	Desogestrel |Ethinyl Estradiol	FALSE	TRUE
968	deep relief ibuprofen gel	121	deep relief ibuprofen gel	1140911750	M02AX	Ibuprofen |Menthol	FALSE	TRUE
969	cetraben emollient cream	121	cetraben emollient cream	1141185986	D02AX	Mineral Oil |Petrolatum	FALSE	TRUE
970	codipar caplet	120	codipar caplet	1141187304	N02AJ06	Acetaminophen |Codeine	FALSE	TRUE
971	glucose product	120	glucose product	1140888438	B05CX01 |V04CA02 |V06DC01	Glucose	FALSE	TRUE
972	dorzolamide+timolol	119	dorzolamide+timolol	1141169516	S01ED51	Timolol |Dorzolamide	FALSE	TRUE
973	antihypertensive	119						TRUE
974	acrivastine	117	acrivastine	1140862760	R06AX18	Acrivastine	FALSE	TRUE
975	dovonex 50micrograms/g ointment	117	dovonex 50micrograms/g ointment	1140878378	D05AX02	Calcipotriol	FALSE	TRUE
976	glandosane plain spray	117						TRUE
977	kalms tablet	116						TRUE
978	bicalutamide	115	bicalutamide	1140917306	L02BB03	Bicalutamide	FALSE	TRUE
979	polytar liquid	115	polytar liquid	1140878498	D05AA	Coal Tar	FALSE	TRUE
980	estradot 25micrograms patch	114	estradot 25micrograms patch	1141202030	G03CA03	Estradiol	FALSE	TRUE
981	bromelains	112	bromelains	1140853200	D03BA03 |M09AB03	Bromelain	FALSE	TRUE
982	tridestra tablet	112	tridestra tablet	1140921088	G03FB06	Medroxyprogesterone Acetate |Estradiol	FALSE	TRUE
983	perindopril+indapamide	111	perindopril+indapamide	1141180592	C09BA04	Perindopril |Indapamide	FALSE	TRUE
984	dermol cream	110	dermol cream	1141195836	D02AX	Chlorhexidine |Mineral Oil |Benzalkonium |Isopropyl Myristate	FALSE	TRUE
985	oestrogel 1.25g gel	110	oestrogel 1.25g gel	1140917450	G03CA03	Estradiol	FALSE	TRUE
986	zestoretic 10 tablet	109	zestoretic 10 tablet	1140864618	C09BA03	Lisinopril |Hydrochlorothiazide	FALSE	TRUE
987	vitamin k product	109	vitamin k product	1140871138	B02BA	Vitamin K	FALSE	TRUE
988	calfovit d3 powder for oral suspension	108	calfovit d3 powder for oral suspension	1141191312	A12AX	Cholecalciferol |Calcium Phosphate	FALSE	TRUE
989	ritonavir	108	ritonavir	1140928384	J05AE03	Ritonavir	FALSE	TRUE
990	movelat cream	108	movelat cream	1140875630	M02AC	Salicylic Acid |Mucopolysaccharide Polysulfate	FALSE	TRUE
991	sustanon 100 oily injection	108	sustanon 100 oily injection	1140868538	G03BA03	Testosterone Propionate |Testosterone Decanoate |Testosterone Isocaproate |Testosterone Phenylpropionate	FALSE	TRUE
992	conjugated oestrogens	107	conjugated oestrogens	1140868406	G03CA57	Conjugated Estrogens	FALSE	TRUE
993	sandrena 0.5mg gel	107	sandrena 0.5mg gel	1141151368	G03CA03	Estradiol	FALSE	TRUE
994	metronidazole product	107	metronidazole product	1141157364	A01AB17 |D06BX01 |G01AF01 |J01XD01 |P01AB01	Metronidazole	FALSE	TRUE
995	phenergan 10mg tablet	107	phenergan 10mg tablet	1140862810	R06AD02	Promethazine	FALSE	TRUE
996	solpadeine tablet	106	solpadeine tablet	1141168648	N02AJ06	Acetaminophen |Codeine	FALSE	TRUE
997	benadryl allergy relief 8mg capsule	106	benadryl allergy relief 8mg capsule	1141162526	R06AX18	Acrivastine	FALSE	TRUE
998	dovonex scalp solution	105	dovonex scalp solution	1140910884	D05AX02	Calcipotriol	FALSE	TRUE
999	folinic acid	105	folinic acid	1141173342	V03AF03	Leucovorin	FALSE	TRUE
1000	metrogel 0.75% gel	105	metrogel 0.75% gel	1140880462	D06BX01	Metronidazole	FALSE	TRUE
1001	regulan 3.6g/sachet powder	105	regulan 3.6g/sachet powder	1140865762	A06AC01	Plantago Seed	FALSE	TRUE
1002	atenolol+bendroflumethiazide	104	atenolol+bendroflumethiazide	1141194810	C07BB03	Atenolol |Bendroflumethiazide	FALSE	TRUE
1003	coversyl plus 4mg/1.25mg tablet	104	coversyl plus 4mg/1.25mg tablet	1141180598	C09BA04	Perindopril |Indapamide	FALSE	TRUE
1004	ascorbic acid product	104	ascorbic acid product	1140870932	A11GA01 |S01XA15 |G01AD03	Vitamin C	FALSE	TRUE
1005	amisulpride	103	amisulpride	1141153490	N05AL05	Amisulpride	FALSE	TRUE
1006	colestyramine	103	colestyramine	1140909780	C10AC01	Cholestyramine	FALSE	TRUE
1007	nizatidine	103	nizatidine	1140865618	A02BA04	Nizatidine	FALSE	TRUE
1008	co-trimoxazole	103	co-trimoxazole	1140873780	J01EE01	Trimethoprim |Sulfamethoxazole	FALSE	TRUE
1009	dicycloverine	102	dicycloverine	1141194852	A03AA07	Dicyclomine	FALSE	TRUE
1010	modafinil	102	modafinil	1141163114	N06BA07	Modafinil	FALSE	TRUE
1011	aminophylline	101	aminophylline	1140862260	R03DA05	Aminophylline	FALSE	TRUE
1012	oilatum emollient bath additive	100	oilatum emollient bath additive	1140878248	D02A	Light Mineral Oil	FALSE	TRUE
1013	potassium product	100	potassium product	1140888432	A12BA	Potassium	FALSE	TRUE
1014	selegiline	100	selegiline	1140879668	N04BD01	Selegiline	FALSE	TRUE
1015	clonidine hydrochloride 25micrograms tablet	99	clonidine hydrochloride 25micrograms tablet	1140871986	N02CX02	Clonidine	FALSE	TRUE
1016	isosorbide mononitrate product	99	isosorbide mononitrate product	1141157254	C01DA14	Isosorbide Mononitrate	FALSE	TRUE
1017	latanoprost+timolol	99	latanoprost+timolol	1141184722	S01ED51	Timolol |Latanoprost	FALSE	TRUE
1018	gastrocote liquid	98	gastrocote liquid	1140881414	A02AX	Sodium Bicarbonate |Aluminum Hydroxide |Alginic Acid |Magnesium Trisilicate	FALSE	TRUE
1019	beta-blocker	97						TRUE
1020	ciprofibrate	96	ciprofibrate	1140862026	C10AB08	Ciprofibrate	FALSE	TRUE
1021	yasmin tablet	96	yasmin tablet	1141179824	G03AA12	Ethinyl Estradiol |Drospirenone	FALSE	TRUE
1022	glipizide	96	glipizide	1140874646	A10BB07	Glipizide	FALSE	TRUE
1023	locoid 0.1% cream	96	locoid 0.1% cream	1140882852	D07AB02	Hydrocortisone	FALSE	TRUE
1024	estracombi tts patch	96	estracombi tts patch	1140868520	G03CA03	Norethisterone |Estradiol	FALSE	TRUE
1025	promethazine product	96	promethazine product	1140882082	D04AA10 |R06AD02	Promethazine	FALSE	TRUE
1026	minims artificial tears single-use eye drops	96	minims artificial tears single-use eye drops	1140878190	S01XA20	Sodium Chloride |Hydroxyethyl Cellulose	FALSE	TRUE
1027	hydromol cream	96	hydromol cream	1140878328	D02A	Sodium Pyrrolidone Carboxylate	FALSE	TRUE
1028	laxative	96						TRUE
1029	alverine citrate+sterculia 0.5%/62% granules	95	alverine citrate+sterculia 0.5%/62% granules	1140865338	A03AX58	Alverine |Sterculia	FALSE	TRUE
1030	stalevo 50mg / 12.5mg / 200mg tablet	95	stalevo 50mg / 12.5mg / 200mg tablet	1141189134	N04BA03	Entacapone |Levodopa |Carbidopa	FALSE	TRUE
1031	polyvinyl alcohol 1% eye drops	95	polyvinyl alcohol 1% eye drops	1140876006	S01AX20	Polyvinyl Alcohol	FALSE	TRUE
1032	timodine cream	94	timodine cream	1140882756	D01A	Nystatin |Hydrocortisone |Benzalkonium	FALSE	TRUE
1033	ovranette tablet	93	ovranette tablet	1140869186	G03AA07	Levonorgestrel |Ethinyl Estradiol	FALSE	TRUE
1034	diprobase ointment	93	diprobase ointment	1140878286	D02AX	No Active Ingredients	FALSE	TRUE
1035	sudafed 60mg tablet	93	sudafed 60mg tablet	1140863098	R01BA02	Pseudoephedrine	FALSE	TRUE
1036	kapake capsule	92	kapake capsule	1141165512	N02AJ06	Acetaminophen |Codeine	FALSE	TRUE
1037	bezalip-mono 400mg m/r tablet	91	bezalip-mono 400mg m/r tablet	1140861928	C10AB02	Bezafibrate	FALSE	TRUE
1038	prothiaden 25mg capsule	91	prothiaden 25mg capsule	1140867624	N06AA16	Dosulepin	FALSE	TRUE
1039	elleste-solo mx 40 patch	91	elleste-solo mx 40 patch	1141152228	G03CA03	Estradiol	FALSE	TRUE
1040	sanomigran 500micrograms tablet	91	sanomigran 500micrograms tablet	1140871996	N02CX01	Pizotifen	FALSE	TRUE
1041	teoptic 1% eye drops	90	teoptic 1% eye drops	1140877988	S01ED05	Carteolol	FALSE	TRUE
1042	trisequens tablet	90	trisequens tablet	1140868514	G03FB05	Norethisterone |Estradiol	FALSE	TRUE
1043	capsaicin 0.025% cream	89	capsaicin 0.025% cream	1141166746	M02AB01	Capsaicin	FALSE	TRUE
1044	clobazam	89	clobazam	1140863268	N05BA09	Clobazam	FALSE	TRUE
1045	cyclosporin	89	cyclosporin	2038459888	L04AD01 |S01XA18	Cyclosporine	FALSE	TRUE
1046	vitamin a+d capsule	89	vitamin a+d capsule	1140852766	A11CB	Vitamin A |Vitamin D	FALSE	TRUE
1047	zapain capsule	88	zapain capsule	1141178054	N02AJ06	Acetaminophen |Codeine	FALSE	TRUE
1048	exorex lotion	88	exorex lotion	1141167140	D05AA	Coal Tar	FALSE	TRUE
1049	emtricitabine	88	emtricitabine	1141189380	J05AF09	Emtricitabine	FALSE	TRUE
1050	rinatec 0.03% aqueous nasal spray	88	rinatec 0.03% aqueous nasal spray	1141152098	R01AX03	Ipratropium Bromide	FALSE	TRUE
1051	sumatriptan product	88	sumatriptan product	1141157332	N02CC01	Sumatriptan	FALSE	TRUE
1052	sinemet-ls tablet	87	sinemet-ls tablet	1140872420	N04BA02	Levodopa |Carbidopa	FALSE	TRUE
1053	otrivine 0.1% nasal drops	87	otrivine 0.1% nasal drops	1140876098	S01GA03	Xylometazoline	FALSE	TRUE
1054	solpadol effervescent tablet	86	solpadol effervescent tablet	1140871682	N02AJ06	Acetaminophen |Codeine	FALSE	TRUE
1055	frumil tablet	86	frumil tablet	1140866406	C03CA01	Amiloride |Furosemide	FALSE	TRUE
1056	nytol 25mg tablet	86	nytol 25mg tablet	1140862722	R06AA02	Diphenhydramine	FALSE	TRUE
1057	fentanyl product	86	fentanyl product	1141157470	N01AH01 |N02AB03	Fentanyl	FALSE	TRUE
1058	aveeno cream	85	aveeno cream	1140878308	D05AA	Colloidal Oatmeal	FALSE	TRUE
1059	ketoconazole 2% shampoo	85	ketoconazole 2% shampoo	1140880264	D01AC08	Ketoconazole	FALSE	TRUE
1060	ditropan 2.5mg tablet	85	ditropan 2.5mg tablet	1140869492	G04BD04	Oxybutynin	FALSE	TRUE
1061	stugeron 15mg tablet	84	stugeron 15mg tablet	1140868074	N07CA02	Cinnarizine	FALSE	TRUE
1062	prostap sr 3.75mg injection (pdr for recon)+diluent+kit	84	prostap sr 3.75mg injection (pdr for recon)+diluent+kit	1140870284	L02AE02	Leuprolide	FALSE	TRUE
1063	antacid tablet	84						TRUE
1064	geltears gel	83	geltears gel	1140928880	S01XA20	Carbomer 980	FALSE	TRUE
1065	neoral 10mg capsule	83	neoral 10mg capsule	1141167744	L04AD01	Cyclosporine	FALSE	TRUE
1066	monomil xl 60mg m/r tablet	83	monomil xl 60mg m/r tablet	1141189776	C01DA14	Isosorbide Mononitrate	FALSE	TRUE
1067	sandocal 400 effervescent tablet	82	sandocal 400 effervescent tablet	1140870800	A12AA	Calcium Carbonate |Calcium Lactate Gluconate	FALSE	TRUE
1068	emulsifying ointment bp	82	emulsifying ointment bp	1140876312	D09A	Mineral Oil |Petrolatum |Emulsifying Wax	FALSE	TRUE
1069	rapitil 2% eye drops	82	rapitil 2% eye drops	1140917432	S01GX04	Nedocromil	FALSE	TRUE
1070	mintec 0.2ml e/c capsule	82	mintec 0.2ml e/c capsule	1140865418	A03A	Peppermint Oil	FALSE	TRUE
1071	trimipramine	81	trimipramine	1140867756	N06AA06	Trimipramine	FALSE	TRUE
1072	co-diovan 80mg/12.5mg tablet	81	co-diovan 80mg/12.5mg tablet	1141201040	C09DA03	Valsartan |Hydrochlorothiazide	FALSE	TRUE
1073	ventide inhaler	80	ventide inhaler	1140862560	R03AK13	Beclomethasone Dipropionate |Salbutamol	FALSE	TRUE
1074	cephalexin	80	cephalexin	1140873288	J01DB01	Cephalexin	FALSE	TRUE
1075	calmurid cream	79	calmurid cream	1140878236	D02AE	Lactic Acid |Urea	FALSE	TRUE
1076	primidone	79	primidone	1140872132	N03AA03	Primidone	FALSE	TRUE
1077	valsartan+hydrochlorothiazide 80mg/12.5mg tablet	79	valsartan+hydrochlorothiazide 80mg/12.5mg tablet	1141201038	C09DA03	Valsartan |Hydrochlorothiazide	FALSE	TRUE
1078	zoledronic acid	79	zoledronic acid	1141173814	M05BA08	Zoledronic Acid	FALSE	TRUE
1079	diltiazem hcl+hydrochlorothiazide 150mg/12.5mg m/r capsule	78	diltiazem hcl+hydrochlorothiazide 150mg/12.5mg m/r capsule	1140926778	C08GA	Diltiazem |Hydrochlorothiazide	FALSE	TRUE
1080	xismox xl 60 m/r tablet	78	xismox xl 60 m/r tablet	1141173888	C01DA14	Isosorbide Mononitrate	FALSE	TRUE
1081	lyrinel xl 5mg m/r tablet	78	lyrinel xl 5mg m/r tablet	1141193290	G04BD04	Oxybutynin	FALSE	TRUE
1082	pseudoephedrine	78	pseudoephedrine	1140882142	R01BA02	Pseudoephedrine	FALSE	TRUE
1083	trihexyphenidyl	78	trihexyphenidyl	1140909816	N04AA01	Trihexyphenidyl	FALSE	TRUE
1084	nevirapine	77	nevirapine	1141167014	J05AG01	Nevirapine	FALSE	TRUE
1085	lomotil tablet	76	lomotil tablet	1140865658	A07DA01	Atropine |Diphenoxylate	FALSE	TRUE
1086	femodene tablet	75	femodene tablet	1140869334	G03AA10	Ethinyl Estradiol |Gestodene	FALSE	TRUE
1087	dried yeast 300mg tablet	75						TRUE
1088	amorolfine	74	amorolfine	1140880466	D01AE16	Amorolfine Hydrochloride	FALSE	TRUE
1089	ciclosporin	74	ciclosporin	1140909844	L04AD01 |S01XA18	Cyclosporine	FALSE	TRUE
1090	dianette tablet	74	dianette tablet	1140880234	G03HB01	Ethinyl Estradiol |Cyproterone Acetate	FALSE	TRUE
1091	fluconazole	74	fluconazole	1140874272	J02AC01 |D01AC15	Fluconazole	FALSE	TRUE
1092	oxycontin 10mg m/r tablet	74	oxycontin 10mg m/r tablet	1141171048	N02AA05	Oxycodone	FALSE	TRUE
1093	algesal cream	73	algesal cream	1140875596	M02AC	Diethylamine Salicylate	FALSE	TRUE
1094	mizolastine product	73	mizolastine product	1141157056	R06AX25	Mizolastine	FALSE	TRUE
1095	benadryl 25mg capsule	72	benadryl 25mg capsule	1140855562	R06AA02	Diphenhydramine	FALSE	TRUE
1096	efavirenz	72	efavirenz	1141165518	J05AG03	Efavirenz	FALSE	TRUE
1097	cyclo-progynova 1mg tablet	72	cyclo-progynova 1mg tablet	1140868508	G03F	Estradiol |Norgestrel	FALSE	TRUE
1098	syntaris 25micrograms nasal spray	72	syntaris 25micrograms nasal spray	1140876052	R01AD04	Flunisolide	FALSE	TRUE
1099	efudix cream	72	efudix cream	1140869778	L01BC02	Fluorouracil	FALSE	TRUE
1100	methocarbamol	72	methocarbamol	1140875452	M03BA03	Methocarbamol	FALSE	TRUE
1101	avandia 4mg tablet	72	avandia 4mg tablet	1141177606	A10BG02	Rosiglitazone	FALSE	TRUE
1102	maxepa 1g capsule	71	maxepa 1g capsule	1140861884	V06D	Docosahexaenoic Acid |Eicosapentaenoic Acid	FALSE	TRUE
1103	teveten 300mg tablet	71	teveten 300mg tablet	1141171344	C09CA02	Eprosartan	FALSE	TRUE
1104	co-beneldopa	71	co-beneldopa	1140882110	N04BA02	Levodopa |Benserazide	FALSE	TRUE
1105	prazosin	71	prazosin	1140879794	C02CA01	Prazosin	FALSE	TRUE
1106	cacit d3 granules	70	cacit d3 granules	1141145880	A12AX	Cholecalciferol |Calcium Carbonate	FALSE	TRUE
1107	regurin 20mg tablet	70	regurin 20mg tablet	1141171502	G04BD09	Trospium	FALSE	TRUE
1108	vitamin d2	69	vitamin d2	1140909878	A11CC01	Ergocalciferol	FALSE	TRUE
1109	betagan eye drops	69	betagan eye drops	1140878098	S01ED03	Levobunolol	FALSE	TRUE
1110	requip 0.25mg tablet	69	requip 0.25mg tablet	1140928338	N04BC04	Ropinirole	FALSE	TRUE
1111	combined oral contraceptive product	69						TRUE
1112	piroxicam 0.5% gel	68	piroxicam 0.5% gel	1140875546	M02AA07	Piroxicam	FALSE	TRUE
1113	migraleve duopack tablet	67	migraleve duopack tablet	1140872026	N02AA79	Acetaminophen |Codeine |Buclizine	FALSE	TRUE
1114	almogran 12.5mg tablet	67	almogran 12.5mg tablet	1141172628	N02CC05	Almotriptan	FALSE	TRUE
1115	cefradine	67	cefradine	1141180644	J01DB09	Cefradine	FALSE	TRUE
1116	dermol 200 shower emollient	67	dermol 200 shower emollient	1141168374	D02A	Chlorhexidine |Mineral Oil |Benzalkonium |Isopropyl Myristate	FALSE	TRUE
1117	scheriproct ointment	67	scheriproct ointment	1140881448	D07XA02	Cinchocaine |Prednisolone	FALSE	TRUE
1118	nebilet 5mg tablet	67	nebilet 5mg tablet	1141164280	C07AB12	Nebivolol	FALSE	TRUE
1119	mysoline 250mg tablet	67	mysoline 250mg tablet	1140872134	N03AA03	Primidone	FALSE	TRUE
1120	betamethasone+calcipotriol	66	betamethasone+calcipotriol	1141179982	D05AX52	Betamethasone |Calcipotriol	FALSE	TRUE
1121	dapsone	66	dapsone	1140874104	D10AX05 |J04BA02	Dapsone	FALSE	TRUE
1122	frovatriptan	66	frovatriptan	1141192666	N02CC07	Frovatriptan	FALSE	TRUE
1123	lamivudine	66	lamivudine	1140928142	J05AF05	Lamivudine	FALSE	TRUE
1124	daktarin 2% cream	66	daktarin 2% cream	1140882464	D01AC02	Miconazole	FALSE	TRUE
1125	olsalazine	66	olsalazine	1140879502	A07EC03	Olsalazine	FALSE	TRUE
1126	biotene oralbalance oral gel	66						TRUE
1127	aranesp 10micrograms/0.4ml prefilled syringe	65	aranesp 10micrograms/0.4ml prefilled syringe	1141178816	B03XA02	Darbepoetin Alfa	FALSE	TRUE
1128	fematrix 40 patch	65	fematrix 40 patch	1140923598	G03CA03	Estradiol	FALSE	TRUE
1129	theophylline product	65	theophylline product	1140862412	R03DA04	Theophylline	FALSE	TRUE
1130	bendrofluazide+potassium 2.5mg/7.7mmol m/r tablet	64	bendrofluazide+potassium 2.5mg/7.7mmol m/r tablet	1140866450	C03AB01	Bendroflumethiazide |Potassium	FALSE	TRUE
1131	methadone	64	methadone	1140884482	N07BC02	Methadone	FALSE	TRUE
1132	naftidrofuryl	64	naftidrofuryl	1140888676	C04AX21	Naftidrofuryl Oxalate	FALSE	TRUE
1133	nicardipine	64	nicardipine	1140879810	C08CA04	Nicardipine	FALSE	TRUE
1134	oxazepam	64	oxazepam	1140863442	N05BA04	Oxazepam	FALSE	TRUE
1135	reboxetine	64	reboxetine	1141151978	N06AX18	Reboxetine	FALSE	TRUE
1136	abacavir	63	abacavir	1141165852	J05AF06	Abacavir	FALSE	TRUE
1137	acitretin	63	acitretin	1140880090	D05BB02	Acitretin	FALSE	TRUE
1138	bzt - bendrofluazide	63	bzt - bendrofluazide	1140910442	C03AA01	Bendroflumethiazide	FALSE	TRUE
1139	glycerol suppository	63	glycerol suppository	1140910750	A06AX01	Glycerin	FALSE	TRUE
1140	entacapone	62	entacapone	1141169700	N04BX02	Entacapone	FALSE	TRUE
1141	nizoral 20mg/ml shampoo	62	nizoral 20mg/ml shampoo	1140916950	D01AC08	Ketoconazole	FALSE	TRUE
1142	alprostadil	61	alprostadil	1140869100	C01EA01 |G04BE01	Alprostadil	FALSE	TRUE
1143	valium 2mg tablet	61	valium 2mg tablet	1140863244	N05BA01	Diazepam	FALSE	TRUE
1144	ondansetron	61	ondansetron	1140868134	A04AA01	Ondansetron	FALSE	TRUE
1145	aceclofenac	60	aceclofenac	1140925806	M01AB16 |M02AA25	Aceclofenac	FALSE	TRUE
1146	neotigason 10mg capsule	60	neotigason 10mg capsule	1140880092	D05BB02	Acitretin	FALSE	TRUE
1147	cortisone product	60	cortisone product	1140884704	H02AB10 |S01BA03	Cortisone Acetate	FALSE	TRUE
1148	monomax sr 40 m/r capsule	60	monomax sr 40 m/r capsule	1140923788	C01DA14	Isosorbide Mononitrate	FALSE	TRUE
1149	levobunolol	60	levobunolol	1140879826	S01ED03	Levobunolol	FALSE	TRUE
1150	loperamide hydrochloride+simethicone	60	loperamide hydrochloride+simethicone	1141167096	A07DA53	Loperamide |Simethicone	FALSE	TRUE
1151	mizollen 10mg m/r tablet	60	mizollen 10mg m/r tablet	1141157060	R06AX25	Mizolastine	FALSE	TRUE
1152	mebeverine hcl+ispaghula 135mg/3.5g/sachet granules	60	mebeverine hcl+ispaghula 135mg/3.5g/sachet granules	1140865408	A06AC01 |A03AA04	Plantago Seed |Mebeverine Hydrochloride	FALSE	TRUE
1153	dyazide tablet	60	dyazide tablet	1140866402	C03EA01	Triamterene |Hydrochlorothiazide	FALSE	TRUE
1154	betoptic 0.5% eye drops	59	betoptic 0.5% eye drops	1140881890	S01ED02	Betaxolol	FALSE	TRUE
1155	xyloproct ointment	59	xyloproct ointment	1140881454	C05AA01	Lidocaine |Hydrocortisone	FALSE	TRUE
1156	rozex 0.75% cream	59	rozex 0.75% cream	1141167038	D06BX01	Metronidazole	FALSE	TRUE
1157	cocois ointment	58	cocois ointment	1140876424	D05AA	Salicylic Acid |Sulfur |Coal Tar	FALSE	TRUE
1158	imedeen tablet	58	imedeen tablet	1140917128	V06D	Vitamin C |Zinc	FALSE	TRUE
1159	paracodol capsule	57	paracodol capsule	1140925778	N02AJ06	Acetaminophen |Codeine	FALSE	TRUE
1160	itraconazole	57	itraconazole	1140874302	J02AC02	Itraconazole	FALSE	TRUE
1161	ketoprofen 2.5% gel	57	ketoprofen 2.5% gel	1140875642	M02AA10	Ketoprofen	FALSE	TRUE
1162	oilatum bath formula liquid bath additive	57	oilatum bath formula liquid bath additive	1141200878	D02A	Light Mineral Oil	FALSE	TRUE
1163	loprazolam	57	loprazolam	1140863120	N05CD11	Loprazolam Mesilate	FALSE	TRUE
1164	micardisplus 40mg/12.5mg tablet	57	micardisplus 40mg/12.5mg tablet	1141187790	C09DA07	Telmisartan |Hydrochlorothiazide	FALSE	TRUE
1165	sudafed 0.05% nasal spray	57	sudafed 0.05% nasal spray	1140876088	R01AA07	Xylometazoline	FALSE	TRUE
1166	co-phenotrope	56	co-phenotrope	1140881334	A07DA01	Atropine |Diphenoxylate	FALSE	TRUE
1167	casodex 50mg tablet	56	casodex 50mg tablet	1140917310	L02BB03	Bicalutamide	FALSE	TRUE
1168	disulfiram	56	disulfiram	1140872480	N07BB01 |P03AA04	Disulfiram	FALSE	TRUE
1169	folicin tablet	56	folicin tablet	1140870486	B03AD	Folic Acid |Cupric Sulfate |Manganese	FALSE	TRUE
1170	calcium sulphaloxate	56						TRUE
1171	anusol hc ointment	55	anusol hc ointment	1140881442	C05AA01	Benzyl Benzoate |Zinc Oxide |Bismuth Subsalicylate |Balsam Of Peru	FALSE	TRUE
1172	mercaptopurine	55	mercaptopurine	1140869842	L01BB02	Mercaptopurine	FALSE	TRUE
1173	propiverine hydrochloride	55	propiverine hydrochloride	1141168714	G04BD06	Propiverine	FALSE	TRUE
1174	loceryl nail lacquer	54	loceryl nail lacquer	1140878676	D01AE16	Amorolfine Hydrochloride	FALSE	TRUE
1175	propranolol hydrochloride+bendrofluazide 80mg/2.5mg capsule	54	propranolol hydrochloride+bendrofluazide 80mg/2.5mg capsule	1140860418	C07BA05	Bendroflumethiazide |Propranolol	FALSE	TRUE
1176	cyclophosphamide	54	cyclophosphamide	1140869604	L01AA01	Cyclophosphamide	FALSE	TRUE
1177	diethylamine salicylate 10% cream bp	54	diethylamine salicylate 10% cream bp	1140921938	M02AC	Diethylamine Salicylate	FALSE	TRUE
1178	copaxone 20mg injection (pdr for recon)	54	copaxone 20mg injection (pdr for recon)	1141172620	L03AX13	Glatiramer Acetate	FALSE	TRUE
1179	efcortelan 0.5% cream	54	efcortelan 0.5% cream	1140882742	D07AA02	Hydrocortisone	FALSE	TRUE
1180	genotropin 12iu multidose injection	54	genotropin 12iu multidose injection	1140857748	H01AC01	Somatropin Recombinant	FALSE	TRUE
1181	chlordiazepoxide	53	chlordiazepoxide	1140863328	N05BA02	Chlordiazepoxide	FALSE	TRUE
1182	sibutramine	53	sibutramine	1141174500	A08AA10	Sibutramine	FALSE	TRUE
1183	tolbutamide	53	tolbutamide	1140874674	A10BB03 |V04CA01	Tolbutamide	FALSE	TRUE
1184	salivix pastille	53						TRUE
1185	remedeine tablet	52	remedeine tablet	1140871684	N02AJ01	Acetaminophen |Dihydrocodeine	FALSE	TRUE
1186	benzydamine	52	benzydamine	1140884396	A01AD02 |G02CC03 |M01AX07 |M02AA05 |R02AX03	Benzydamine	FALSE	TRUE
1187	corsodyl original mouthwash	52	corsodyl original mouthwash	1140878734	A01AB03	Chlorhexidine	FALSE	TRUE
1188	glivec 100mg tablet	52	glivec 100mg tablet	1141200440	L01XE01	Imatinib	FALSE	TRUE
1189	malarone tablet	51	malarone tablet	1141153410	P01BB51	Atovaquone |Proguanil	FALSE	TRUE
1190	meptazinol	51	meptazinol	1140881026	N02AX05	Meptazinol Hydrochloride	FALSE	TRUE
1191	mst continus 30mg m/r tablet	51	mst continus 30mg m/r tablet	1140871780	N02AA01	Morphine	FALSE	TRUE
1192	acarbose	50	acarbose	1140868902	A10BF01	Acarbose	FALSE	TRUE
1193	moduretic tablet	50	moduretic tablet	1140866420	C03EA01	Amiloride |Hydrochlorothiazide	FALSE	TRUE
1194	bezalip 200mg tablet	50	bezalip 200mg tablet	1140861926	C10AB02	Bezafibrate	FALSE	TRUE
1195	flunisolide	50	flunisolide	1140876154	R01AD04 |R03BA03	Flunisolide	FALSE	TRUE
1196	hydrocortisone+miconazole	50	hydrocortisone+miconazole	1140882908	D01A	Hydrocortisone |Miconazole	FALSE	TRUE
1197	magnesium hydroxide	50	magnesium hydroxide	1140881330	A02AA04 |G04BX01	Magnesium Hydroxide	FALSE	TRUE
1198	niacin	50	niacin	1140910670	C04AC01 |C10AD02	Niacin	FALSE	TRUE
1199	balneum bath oil	50	balneum bath oil	1140878244	D02A	Soya Oil	FALSE	TRUE
1200	telmisartan+hydrochlorothiazide 40mg/12.5mg tablet	50	telmisartan+hydrochlorothiazide 40mg/12.5mg tablet	1141187788	C09DA07	Telmisartan |Hydrochlorothiazide	FALSE	TRUE
1201	ortho-dienoestrol 0.01% cream	49	ortho-dienoestrol 0.01% cream	1140883014	G03CB01	Dienestrol	FALSE	TRUE
1202	harmogen 1.5mg tablet	49	harmogen 1.5mg tablet	1140868422	G03C	Estrone Sulfate	FALSE	TRUE
1203	alphosyl cream	49	alphosyl cream	1140878346	D07XA01	Hydrocortisone |Coal Tar |Allantoin	FALSE	TRUE
1204	lormetazepam	49	lormetazepam	1140863176	N05CD06	Lormetazepam	FALSE	TRUE
1205	unguentum m cream	49	unguentum m cream	1141164652	D02AX	No Active Ingredients	FALSE	TRUE
1206	felodipine+ramipril	49	felodipine+ramipril	1141165470	C09BB05	Ramipril |Felodipine	FALSE	TRUE
1207	halibut-liver oil capsule	49	halibut-liver oil capsule	1140877600	A11CB	Vitamin A |Vitamin D	FALSE	TRUE
1208	solpadeine soluble effervescent tablet	48	solpadeine soluble effervescent tablet	1140856442	N02AJ09	Caffeine |Acetaminophen |Codeine	FALSE	TRUE
1209	half-sinemet cr m/r tablet	48	half-sinemet cr m/r tablet	1140872434	N04BA02	Levodopa |Carbidopa	FALSE	TRUE
1210	liquid paraffin product	48	liquid paraffin product	1141170844	A06AA01	Mineral Oil	FALSE	TRUE
1211	paracetamol+tramadol	48	paracetamol+tramadol	1141190956	N02AX52	Tramadol |Acetaminophen	FALSE	TRUE
1212	acamprosate calcium	47	acamprosate calcium	1140926990	N07BB03	Acamprosate	FALSE	TRUE
1213	caverject 5micrograms injection (pdr for recon)+diluent	47	caverject 5micrograms injection (pdr for recon)+diluent	1141152912	G04BE01	Alprostadil	FALSE	TRUE
1214	atazanavir	47	atazanavir	1141190554	J05AE08	Atazanavir	FALSE	TRUE
1215	sodium clodronate	47	sodium clodronate	1140868794	M05BA02	Clodronic Acid	FALSE	TRUE
1216	anafranil 10mg capsule	47	anafranil 10mg capsule	1140867690	N06AA04	Clomipramine	FALSE	TRUE
1217	oestradiol 1.25g/dose gel	47	oestradiol 1.25g/dose gel	1140917448	G03CA03	Estradiol	FALSE	TRUE
1218	femodette tablet	47	femodette tablet	1141166368	G03AA10	Ethinyl Estradiol |Gestodene	FALSE	TRUE
1219	ketoconazole	47	ketoconazole	1140874336	D01AC08 |G01AF11 |J02AB02	Ketoconazole	FALSE	TRUE
1220	tetralysal 204mg capsule	47	tetralysal 204mg capsule	1140857044	J01AA04	Lymecycline	FALSE	TRUE
1221	oxygen gas	47	oxygen gas	1140855694	V03AN01	Oxygen	FALSE	TRUE
1222	otrivine-antistin eye drops	47	otrivine-antistin eye drops	1140878048	S01GA53	Xylometazoline |Antazoline	FALSE	TRUE
1223	nytol 25mg caplet	46	nytol 25mg caplet	1141153080	R06AA02	Diphenhydramine	FALSE	TRUE
1224	ergocalciferol product	46	ergocalciferol product	1140876588	A11CC01	Ergocalciferol	FALSE	TRUE
1225	trinovum tablet	46	trinovum tablet	1140869266	G03AA05	Norethisterone |Ethinyl Estradiol	FALSE	TRUE
1226	canesten hc cream	45	canesten hc cream	1140882904	D01AC20	Clotrimazole |Hydrocortisone	FALSE	TRUE
1227	clozapine	45	clozapine	1140867420	N05AH02	Clozapine	FALSE	TRUE
1228	mst continus 10mg m/r tablet	45	mst continus 10mg m/r tablet	1140871776	N02AA01	Morphine	FALSE	TRUE
1229	ispagel 3.5g/sachet s/f powder	45	ispagel 3.5g/sachet s/f powder	1141185480	A06AC01	Plantago Seed	FALSE	TRUE
1230	detrunorm 15mg tablet	45	detrunorm 15mg tablet	1141168718	G04BD06	Propiverine	FALSE	TRUE
1231	dipyridamole+aspirin	44	dipyridamole+aspirin	1141167844	B01AC30	Acetylsalicylic Acid |Dipyridamole	FALSE	TRUE
1232	cyproterone	44	cyproterone	1140884634	G03HA01	Cyproterone Acetate	FALSE	TRUE
1233	oestradiol 25mg implant 36 week	44	oestradiol 25mg implant 36 week	1140857690	G03CA03	Estradiol	FALSE	TRUE
1234	locorten-vioform ear drops	44	locorten-vioform ear drops	1140875974	S02AA30	Flumethasone |Clioquinol	FALSE	TRUE
1235	migard 2.5mg tablet	44	migard 2.5mg tablet	1141192670	N02CC07	Frovatriptan	FALSE	TRUE
1236	ibuprofen+menthol 5%/3% gel	44	ibuprofen+menthol 5%/3% gel	1140911748	M01AE51	Ibuprofen |Menthol	FALSE	TRUE
1237	nateglinide	44	nateglinide	1141173882	A10BX03	Nateglinide	FALSE	TRUE
1238	simple eye ointment	44	simple eye ointment	1140876026	S01AX	No Active Ingredients	FALSE	TRUE
1239	cod liver oil+zinc oxide 11.4/38% ointment	44	cod liver oil+zinc oxide 11.4/38% ointment	1140876350	D02AB |D03AA	Zinc Oxide |Cod Liver Oil	FALSE	TRUE
1240	clindamycin	43	clindamycin	1140873650	D10AF01 |G01AA10 |J01FF01	Clindamycin	FALSE	TRUE
1241	brevinor tablet	43	brevinor tablet	1140869256	G03AA05	Norethisterone |Ethinyl Estradiol	FALSE	TRUE
1242	paracetamol+dihydrocodeine tartrate	42	paracetamol+dihydrocodeine tartrate	1140882396	N02AJ01	Acetaminophen |Dihydrocodeine	FALSE	TRUE
1243	capsaicin 0.075% cream	42	capsaicin 0.075% cream	1140864558	M02AB01	Capsaicin	FALSE	TRUE
1244	traxam gel	42	traxam gel	1140875640	M02AA08	Felbinac	FALSE	TRUE
1245	zomorph 10mg m/r capsule	42	zomorph 10mg m/r capsule	1141152986	N02AA01	Morphine	FALSE	TRUE
1246	sando-k effervescent tablet	42	sando-k effervescent tablet	1140870554	A12BA51	Potassium Chloride |Potassium Bicarbonate	FALSE	TRUE
1247	propantheline	42	propantheline	1140883480	A03AB05	Propantheline	FALSE	TRUE
1248	sotalol hydrochloride+hydrochlorothiazide 80mg/12.5mg tablet	42	sotalol hydrochloride+hydrochlorothiazide 80mg/12.5mg tablet	1140860332	C07BA07	Sotalol |Hydrochlorothiazide	FALSE	TRUE
1249	maalox plus suspension	41	maalox plus suspension	1140865366	A02AF02	Aluminum Hydroxide |Magnesium Hydroxide	FALSE	TRUE
1250	solpadeine plus soluble effervescent tablet	41	solpadeine plus soluble effervescent tablet	1141189064	N02AJ09	Caffeine |Acetaminophen |Codeine	FALSE	TRUE
1251	capecitabine	41	capecitabine	1141173030	L01BC06	Capecitabine	FALSE	TRUE
1252	oestriol product	41	oestriol product	1140868400	G03CA04	Estriol	FALSE	TRUE
1253	alphosyl hc cream	41	alphosyl hc cream	1140878418	D07XA01	Hydrocortisone |Coal Tar |Allantoin	FALSE	TRUE
1254	gentisone hc ear drops	41	gentisone hc ear drops	1140884074	S03AA	Hydrocortisone |Gentamicin	FALSE	TRUE
1255	morphine sulphate+atropine sulphate	41	morphine sulphate+atropine sulphate	1140882116	A03CB03	Morphine |Atropine	FALSE	TRUE
1256	estradiol+norethisterone acetate 1mg/0.5mg tablet	41	estradiol+norethisterone acetate 1mg/0.5mg tablet	1141181818	G03FA01	Norethisterone |Estradiol	FALSE	TRUE
1257	promazine	41	promazine	1140879746	N05AA03	Promazine	FALSE	TRUE
1258	bricanyl 5mg tablet	41	bricanyl 5mg tablet	1140862162	R03CC03	Terbutaline	FALSE	TRUE
1259	solpadeine headache soluble tablet	40	solpadeine headache soluble tablet	1141189068	N02BE51	Caffeine |Acetaminophen	FALSE	TRUE
1260	rynacrom 2% nasal drops	40	rynacrom 2% nasal drops	1140882160	R01AC01	Cromoglicic Acid	FALSE	TRUE
1261	metosyn 0.05% cream	40	metosyn 0.05% cream	1140888142	D07AC08	Fluocinonide	FALSE	TRUE
1262	exe-cort hydrocortisone 1% cream	40	exe-cort hydrocortisone 1% cream	1141189464	S02BA01	Hydrocortisone	FALSE	TRUE
1263	motens 2mg tablet	40	motens 2mg tablet	1140861282	C08CA09	Lacidipine	FALSE	TRUE
1264	methylcellulose	40	methylcellulose	1140865772	A06AC06	Methyl Cellulose	FALSE	TRUE
1265	acupan 30mg tablet	40	acupan 30mg tablet	1140868342	N02BG06	Nefopam Hydrochloride	FALSE	TRUE
1266	viramune 200mg tablet	40	viramune 200mg tablet	1141167020	J05AG01	Nevirapine	FALSE	TRUE
1267	niaspan 500mg m/r tablet	40	niaspan 500mg m/r tablet	1141188546	C10AD02	Niacin	FALSE	TRUE
1268	sulfadiazine	40	sulfadiazine	1141182110	J01EC02	Sulfadiazine	FALSE	TRUE
1269	balneum plus cream	40	balneum plus cream	1141146426	D02A	Urea |Lauromacrogols	FALSE	TRUE
1270	sudocrem cream	39	sudocrem cream	1140878330	D02AB	Benzyl Benzoate |Benzyl Alcohol |Zinc Oxide |Lanolin	FALSE	TRUE
1271	chloramphenicol 1% eye ointment	39	chloramphenicol 1% eye ointment	1140875566	S01AA01	Chloramphenicol	FALSE	TRUE
1272	cilostazol	39	cilostazol	1141181150	B01AC23	Cilostazol	FALSE	TRUE
1273	doxepin	39	doxepin	1140867640	N06AA12	Doxepin	FALSE	TRUE
1274	zineryt topical solution	39	zineryt topical solution	1140880140	D10AF52	Erythromycin |Zinc	FALSE	TRUE
1275	oxycontin 20mg m/r tablet	39	oxycontin 20mg m/r tablet	1141171050	N02AA05	Oxycodone	FALSE	TRUE
1276	benadryl plus capsule	39	benadryl plus capsule	1141173212	R01BA52	Pseudoephedrine |Acrivastine	FALSE	TRUE
1277	zafirlukast	39	zafirlukast	1141168340	R03DC01	Zafirlukast	FALSE	TRUE
1278	kolanticon gel	38	kolanticon gel	1140865380	A03A	Aluminum Hydroxide |Simethicone |Dicycloverine Hydrochloride |Light Magnesium Oxide	FALSE	TRUE
1279	temgesic 200mcg sublingual tablet	38	temgesic 200mcg sublingual tablet	1140871734	N02AE01	Buprenorphine	FALSE	TRUE
1280	chloroquine	38	chloroquine	1140874482	P01BA01	Chloroquine	FALSE	TRUE
1281	misoprostol	38	misoprostol	1140865628	A02BB01 |G02AD06	Misoprostol	FALSE	TRUE
1282	ikorel 10mg tablet	38	ikorel 10mg tablet	1140910772	C01DX16	Nicorandil	FALSE	TRUE
1283	dulco-lax 2.5mg perles	38	dulco-lax 2.5mg perles	1141173444	A06AB08	Picosulfuric Acid	FALSE	TRUE
1284	sucralfate	38	sucralfate	1140865536	A02BX02	Sucralfate	FALSE	TRUE
1285	paramol tablet	37	paramol tablet	1140863552	N02AJ01	Acetaminophen |Dihydrocodeine	FALSE	TRUE
1286	difflam sore throat 0.15% oral rinse	37	difflam sore throat 0.15% oral rinse	1141169694	M02AA05	Benzydamine	FALSE	TRUE
1287	tenoret 50 tablet	37	tenoret 50 tablet	1140860324	C07CB03	Chlorthalidone |Atenolol	FALSE	TRUE
1288	cromoglycate	37	cromoglycate	1140910730	A07EB01 |D11AH03 |R01AC01 |R03BC01 |S01GX01	Cromoglicic Acid	FALSE	TRUE
1289	diphenhydramine product	37	diphenhydramine product	1140883600	D04AA32 |R06AA02	Diphenhydramine	FALSE	TRUE
1290	clexane 20mg/0.2ml prefilled syringe	37	clexane 20mg/0.2ml prefilled syringe	1140861594	B01AB05	Enoxaparin	FALSE	TRUE
1291	erythromycin product	37	erythromycin product	1141157356	D10AF02 |J01FA01 |S01AA17	Erythromycin	FALSE	TRUE
1292	flurbiprofen	37	flurbiprofen	1140871236	M01AE09 |M02AA19 |R02AX01 |S01BC04	Flurbiprofen	FALSE	TRUE
1293	colifoam 10% foam	37	colifoam 10% foam	1140882730	A07EA02	Hydrocortisone	FALSE	TRUE
1294	rozex 0.75% gel	37	rozex 0.75% gel	1140916608	D06BX01	Metronidazole	FALSE	TRUE
1295	nicotinic acid product	37	nicotinic acid product	1140861868	C04AC01 |C10AD02	Niacin	FALSE	TRUE
1296	maxitrol eye drops	37	maxitrol eye drops	1140882718	S01CA01	Polymyxin B Sulfate |Neomycin |Dexamethasone	FALSE	TRUE
1297	cocois scalp ointment	37	cocois scalp ointment	1140864346	D05AA	Salicylic Acid |Sulfur |Coal Tar	FALSE	TRUE
1298	emollient product	37						TRUE
1299	lotriderm cream	36	lotriderm cream	1140882778	D01AC	Clotrimazole |Betamethasone	FALSE	TRUE
1300	budesonide+eformoterol	36	budesonide+eformoterol	1141174512	R03AK07	Formoterol |Budesonide	FALSE	TRUE
1301	miconazole	36	miconazole	1140874346	A01AB09 |A07AC01 |D01AC02 |G01AF04 |J02AB01 |S02AA13	Miconazole	FALSE	TRUE
1302	moclobemide	36	moclobemide	1140867920	N06AG02	Moclobemide	FALSE	TRUE
1303	growth hormone product	36	growth hormone product	1140882976	H01AC01	Somatropin Recombinant	FALSE	TRUE
1304	carteolol	35	carteolol	1140879822	C07AA15 |S01ED05	Carteolol	FALSE	TRUE
1305	alphosyl shampoo	35	alphosyl shampoo	1141145710	D05AA	Coal Tar	FALSE	TRUE
1306	fucidin h cream	35	fucidin h cream	1140882920	D06AX01	Hydrocortisone |Fusidic Acid	FALSE	TRUE
1307	eczederm+hydrocortisone cream	35	eczederm+hydrocortisone cream	1140888134	D07XA01	Hydrocortisone |Mineral Oil	FALSE	TRUE
1308	nystatin	35	nystatin	1140874360	A07AA02 |D01AA01 |G01AA01	Nystatin	FALSE	TRUE
1309	disodium pamidronate	35	disodium pamidronate	1140868784	M05BA03	Pamidronate	FALSE	TRUE
1310	adcortyl in orabase oral paste	35	adcortyl in orabase oral paste	1140876240	A01AC01	Triamcinolone	FALSE	TRUE
1311	non-drowsy sinutab tablet	34	non-drowsy sinutab tablet	1141188512	N02BE51	Acetaminophen |Pseudoephedrine	FALSE	TRUE
1312	azelaic acid	34	azelaic acid	1140880208	D10AX03	Azelaic Acid	FALSE	TRUE
1313	chloramphenicol 0.25% eye drops	34	chloramphenicol 0.25% eye drops	1140882538	S01AA01	Chloramphenicol	FALSE	TRUE
1314	sustiva 600mg tablet	34	sustiva 600mg tablet	1141187568	J05AG03	Efavirenz	FALSE	TRUE
1315	estring 2mg(7.5micrograms/24hours) vaginal ring	34	estring 2mg(7.5micrograms/24hours) vaginal ring	1140911708	G03CA03	Estradiol	FALSE	TRUE
1316	modecate 12.5mg/0.5ml oily injection	34	modecate 12.5mg/0.5ml oily injection	1140867456	N05AB02	Fluphenazine	FALSE	TRUE
1317	alphaderm cream	34	alphaderm cream	1140882818	D07XA01	Hydrocortisone |Urea	FALSE	TRUE
1318	betaferon 300micrograms injection (pdr for recon)+diluent	34	betaferon 300micrograms injection (pdr for recon)+diluent	1141181882	L03AB08	Interferon Beta-1B	FALSE	TRUE
1319	lactugal solution	34	lactugal solution	1140865808	A06AD11	Lactulose	FALSE	TRUE
1320	liquid paraffin	34	liquid paraffin	1140865734	A06AA01	Mineral Oil	FALSE	TRUE
1321	sodium picosulfate	34	sodium picosulfate	1140909704	A06AB08	Picosulfuric Acid	FALSE	TRUE
1322	slo-phyllin 60mg m/r capsule	34	slo-phyllin 60mg m/r capsule	1140862424	R03DA04	Theophylline	FALSE	TRUE
1323	tioconazole	34	tioconazole	1140880460	D01AC07 |G01AF08	Tioconazole	FALSE	TRUE
1324	trosyl nail solution	34	trosyl nail solution	1140878672	D01AC07	Tioconazole	TRUE	TRUE
1325	combivir tablet	34	combivir tablet	1141166772	J05AR01	Zidovudine |Lamivudine	FALSE	TRUE
1326	sudafed dual relief capsule	33	sudafed dual relief capsule	1141171672	N02BE51	Acetaminophen |Phenylephrine	FALSE	TRUE
1327	betaxolol	33	betaxolol	1140879758	C07AB05 |S01ED02	Betaxolol	FALSE	TRUE
1328	chlorpheniramine maleate	33	chlorpheniramine maleate	1140862624	R06AB04	Chlorphenamine	FALSE	TRUE
1329	clotrimazole product	33	clotrimazole product	1141157304	A01AB18 |D01AC01 |G01AF02	Clotrimazole	FALSE	TRUE
1330	coal tar product	33	coal tar product	1140879902	D05AA	Coal Tar	FALSE	TRUE
1331	eccoxolac 300mg capsule	33	eccoxolac 300mg capsule	1141193170	M01AB08	Etodolac	FALSE	TRUE
1332	felbinac	33	felbinac	1140884498	M02AA08	Felbinac	FALSE	TRUE
1333	salicylic acid product	33	salicylic acid product	1141157414	D01AE12 |S01BC08	Salicylic Acid	FALSE	TRUE
1334	sudafed co tablet	33						TRUE
1335	atenolol+bendrofluazide	32	atenolol+bendrofluazide	1141146126	C07BB03	Atenolol |Bendroflumethiazide	FALSE	TRUE
1336	cacit 500mg effervescent tablet	32	cacit 500mg effervescent tablet	1140852836	A12AA04	Calcium Carbonate	FALSE	TRUE
1337	hydrocortisone+clotrimazole	32	hydrocortisone+clotrimazole	1140882906	D01A	Clotrimazole |Hydrocortisone	FALSE	TRUE
1338	disopyramide	32	disopyramide	1140866568	C01BA03	Disopyramide	FALSE	TRUE
1339	elantan 10 tablet	32	elantan 10 tablet	1140860982	C01DA14	Isosorbide Mononitrate	FALSE	TRUE
1340	hydrocortisone+lidocaine	32	hydrocortisone+lidocaine	1141194840	A07EA02	Lidocaine |Hydrocortisone	FALSE	TRUE
1341	metrosa 0.75% gel	32	metrosa 0.75% gel	1141192154	D06BX01	Metronidazole	FALSE	TRUE
1342	phenelzine	32	phenelzine	1140867850	N06AF03	Phenelzine	FALSE	TRUE
1343	lamisil 1% cream	32	lamisil 1% cream	1140882474	D01AE15	Terbinafine	FALSE	TRUE
1344	lemsip sachet	31	lemsip sachet	1140911762	N02BE51	Acetaminophen |Phenylephrine	FALSE	TRUE
1345	zovirax 5% cream	31	zovirax 5% cream	1140882478	D06BB03	Aciclovir	FALSE	TRUE
1346	cholestyramine	31	cholestyramine	1140865576	C10AC01	Cholestyramine	FALSE	TRUE
1347	transvasin cream	31	transvasin cream	1140877890	M02A	Ethyl Nicotinate |Hexyl Nicotinate |Tetrahydrofurfuryl Salicylate	FALSE	TRUE
1348	durogesic 25micrograms/hour patch	31	durogesic 25micrograms/hour patch	1140911830	N02AB03	Fentanyl	FALSE	TRUE
1349	cobalin-h 1mg/1ml injection	31	cobalin-h 1mg/1ml injection	1140870508	B03BA03	Hydroxocobalamin	FALSE	TRUE
1350	avonex 30micrograms/0.5ml prefilled syringe	31	avonex 30micrograms/0.5ml prefilled syringe	1141188642	L03AB07	Interferon Beta-1A	FALSE	TRUE
1351	quinidine	31	quinidine	1140851530	C01BA01	Quinidine	FALSE	TRUE
1352	ferrous gluc+folic acid+ascorbic acid 250mg/5mg/10mg tablet	31	ferrous gluc+folic acid+ascorbic acid 250mg/5mg/10mg tablet	1140870410	B03AE02	Vitamin C |Folic Acid |Iron	FALSE	TRUE
1353	remedeine forte tablet	30	remedeine forte tablet	1140871686	N02AJ01	Acetaminophen |Dihydrocodeine	FALSE	TRUE
1354	navispare tablet	30	navispare tablet	1140866352	C03EA07	Amiloride |Cyclopenthiazide	FALSE	TRUE
1355	beclamide	30	beclamide	1140856468	N03AX30	Beclamide	FALSE	TRUE
1356	fibrazate xl 400mg m/r tablet	30	fibrazate xl 400mg m/r tablet	1141201306	C10AB02	Bezafibrate	FALSE	TRUE
1357	feminax tablet	30	feminax tablet	1141188522	N02AA79	Caffeine |Acetaminophen |Codeine |Scopolamine	FALSE	TRUE
1358	bonefos 400mg capsule	30	bonefos 400mg capsule	1140868804	M05BA02	Clodronic Acid	FALSE	TRUE
1359	tri-adcortyl cream	30	tri-adcortyl cream	1140883044	S02CA04	Gramicidin D |Triamcinolone |Nystatin |Neomycin	FALSE	TRUE
1360	imidapril hydrochloride	30	imidapril hydrochloride	1141164148	C09AA16	Imidapril	FALSE	TRUE
1361	nicotine	30	nicotine	2018610518	N07BA01	Nicotine	FALSE	TRUE
1362	orphenadrine	30	orphenadrine	1140883560	N04AB02 |M03BC01	Orphenadrine	FALSE	TRUE
1363	oxynorm 5mg capsule	30	oxynorm 5mg capsule	1141171066	N02AA05	Oxycodone	FALSE	TRUE
1364	hytrin 2mg tablet	30	hytrin 2mg tablet	1140860610	G04CA03	Terazosin	FALSE	TRUE
1365	lamisil 250mg tablet	30	lamisil 250mg tablet	1140882472	D01BA02	Terbinafine	FALSE	TRUE
1366	nuelin 125mg tablet	30	nuelin 125mg tablet	1140862414	R03DA04	Theophylline	FALSE	TRUE
1367	vitamins capsule bpc	30						TRUE
1368	co-magaldrox	29	co-magaldrox	1140881318	A02A	Aluminum Hydroxide |Magnesium Hydroxide	FALSE	TRUE
1369	panadol extra tablet	29	panadol extra tablet	1141168646	N02BE51	Caffeine |Acetaminophen	FALSE	TRUE
1370	ibuprofen+codeine phosphate	29	ibuprofen+codeine phosphate	1140878030	N02AJ08	Codeine |Ibuprofen	FALSE	TRUE
1371	intal 5mg inhaler	29	intal 5mg inhaler	1140862532	R03BC01	Cromoglicic Acid	FALSE	TRUE
1372	co-danthramer	29	co-danthramer	1140881622	A06AB53	Danthron |Poloxamer 188	FALSE	TRUE
1373	nerisone 0.1% cream	29	nerisone 0.1% cream	1140884640	D07AC06	Difluocortolone	FALSE	TRUE
1374	eletriptan	29	eletriptan	1141185436	N02CC06	Eletriptan	FALSE	TRUE
1375	germoloids cream	29	germoloids cream	1141190642	D02AB	Lidocaine |Zinc Oxide	FALSE	TRUE
1376	lipid lowering drug	29						TRUE
1377	sinthrome 1mg tablet	28	sinthrome 1mg tablet	1140861698	B01AA07	Acenocoumarol	FALSE	TRUE
1378	bromocriptine	28	bromocriptine	1140868866	G02CB01 |N04BC01	Bromocriptine	FALSE	TRUE
1379	hydrocortistab 1% cream	28	hydrocortistab 1% cream	1140888628	D07AA02	Hydrocortisone	FALSE	TRUE
1380	imatinib	28	imatinib	1141185284	L01XE01	Imatinib	FALSE	TRUE
1381	monosorb xl 60 m/r tablet	28	monosorb xl 60 m/r tablet	1141162550	C01DA14	Isosorbide Mononitrate	FALSE	TRUE
1382	oramorph 100mg/5ml concentrated oral solution	28	oramorph 100mg/5ml concentrated oral solution	1140882274	N02AA01	Morphine	FALSE	TRUE
1383	oxynorm 10mg capsule	28	oxynorm 10mg capsule	1141170964	N02AA05	Oxycodone	FALSE	TRUE
1384	kaletra 133.3mg/33.3mg capsule	28	kaletra 133.3mg/33.3mg capsule	1141173916	J05AR10	Ritonavir |Lopinavir	FALSE	TRUE
1385	sevelamer	28	sevelamer	1141175192	V03AE02	Sevelamer	FALSE	TRUE
1386	sulfinpyrazone	28	sulfinpyrazone	1140909890	M04AB02	Sulfinpyrazone	FALSE	TRUE
1387	curatoderm 4micrograms/g ointment	28	curatoderm 4micrograms/g ointment	1140923732	D05AX04	Tacalcitol	FALSE	TRUE
1388	co-triamterzide	28	co-triamterzide	1140923272	C03EA01	Triamterene |Hydrochlorothiazide	FALSE	TRUE
1389	hypotonic artificial tears eye drops	28						TRUE
1390	vallergan 10mg tablet	27	vallergan 10mg tablet	1140862742	R06AD01	Alimemazine	FALSE	TRUE
1391	triptafen tablet	27	triptafen tablet	1140867934	N06CA01	Amitriptyline |Perphenazine	FALSE	TRUE
1392	tenif capsule	27	tenif capsule	1140860358	C07FB03	Atenolol |Nifedipine	FALSE	TRUE
1393	difflam cream	27	difflam cream	1140875620	M02AA05	Benzydamine	FALSE	TRUE
1394	colestyramine product	27	colestyramine product	1141180734	C10AC01	Cholestyramine	FALSE	TRUE
1395	eurax cream	27	eurax cream	1140878266	D04AX	Crotamiton	FALSE	TRUE
1396	dhc continus 60mg m/r tablet	27	dhc continus 60mg m/r tablet	1140871920	N02AA08	Dihydrocodeine	FALSE	TRUE
1397	femapak 40 patch+tablet	27	femapak 40 patch+tablet	1140926686	G03FA14	Dydrogesterone |Estradiol	FALSE	TRUE
1398	innozide tablet	27	innozide tablet	1140860784	C09BA02	Enalapril |Hydrochlorothiazide	FALSE	TRUE
1399	otosporin ear drops	27	otosporin ear drops	1140882832	S02CA03	Hydrocortisone |Polymyxin B Sulfate |Neomycin	FALSE	TRUE
1400	balneum plus bath oil	27	balneum plus bath oil	1140878246	D02A	Lauromacrogols |Soya Oil	FALSE	TRUE
1401	camcolit 250 tablet	27	camcolit 250 tablet	1140867494	N05AN01	Lithium	FALSE	TRUE
1402	magnesium trisilicate	27	magnesium trisilicate	1140881324	A02A	Magnesium Trisilicate	FALSE	TRUE
1403	robaxin 750mg tablet	27	robaxin 750mg tablet	1140875454	M03BA03	Methocarbamol	FALSE	TRUE
1404	maxolon 5mg tablet	27	maxolon 5mg tablet	1141150866	A03FA01	Metoclopramide	FALSE	TRUE
1405	liquid paraffin+white soft paraffin 50%/50% ointment	27	liquid paraffin+white soft paraffin 50%/50% ointment	1140916270	D02A	Mineral Oil |Petrolatum	FALSE	TRUE
1406	zomorph 30mg m/r capsule	27	zomorph 30mg m/r capsule	1141152988	N02AA01	Morphine	FALSE	TRUE
1407	pulmadil 200micrograms inhaler	27	pulmadil 200micrograms inhaler	1140862140	R03AC05	Rimiterol Hydrobromide	FALSE	TRUE
1408	andropatch 2.5mg/24hours transdermal patch	27						TRUE
1409	solpadeine max tablet	26	solpadeine max tablet	1141167748	N02AJ09	Acetaminophen |Codeine	FALSE	TRUE
1410	alimemazine	26	alimemazine	1140909792	R06AD01	Alimemazine	FALSE	TRUE
1411	solpadeine plus capsule	26	solpadeine plus capsule	1141189008	N02AJ09	Caffeine |Acetaminophen |Codeine	FALSE	TRUE
1412	piriton 10mg/1ml injection	26	piriton 10mg/1ml injection	1140862632	R06AB04	Chlorphenamine	FALSE	TRUE
1413	dalacin t topical solution	26	dalacin t topical solution	1140880200	D10AF01	Clindamycin	FALSE	TRUE
1414	alphosyl 2 in 1 shampoo	26	alphosyl 2 in 1 shampoo	1140878510	D05AA	Coal Tar	FALSE	TRUE
1415	hirudoid cream	26	hirudoid cream	1140880726	C05BA	Heparinoid	FALSE	TRUE
1416	hydroxyurea	26	hydroxyurea	1140869978	L01XX05	Hydroxyurea	FALSE	TRUE
1417	levonorgestrel	26	levonorgestrel	1140869366	G03AC03 |G03AD01	Levonorgestrel	FALSE	TRUE
1418	lodoxamide	26	lodoxamide	1140875696	S01GX05	Lodoxamide	FALSE	TRUE
1419	metoprolol tartrate+chlorthalidone 100mg/12.5mg tablet	26	metoprolol tartrate+chlorthalidone 100mg/12.5mg tablet	1140860308	C07CB02	Metoprolol |Chlorthalidone	FALSE	TRUE
1420	sevredol 10mg tablet	26	sevredol 10mg tablet	1140871700	N02AA01	Morphine	FALSE	TRUE
1421	pro-banthine 15mg tablet	26	pro-banthine 15mg tablet	1140865330	A03AB05	Propantheline	FALSE	TRUE
1422	polytar af liquid	26	polytar af liquid	1140883828	D05AA	Tar	FALSE	TRUE
1423	septrin 480mg tablet	26	septrin 480mg tablet	1140873930	J01EE01	Trimethoprim |Sulfamethoxazole	FALSE	TRUE
1424	redoxon 25mg tablet	26	redoxon 25mg tablet	1140870946	A11GA	Vitamin C	FALSE	TRUE
1425	vitamins b+c	26	vitamins b+c	1140871004	A11EB	Vitamin C |Vitamin B	FALSE	TRUE
1426	augmentin 375mg tablet	25	augmentin 375mg tablet	1140872798	J01CR02	Amoxicillin |Clavulanate	FALSE	TRUE
1427	hypotears eye drops	25	hypotears eye drops	1140878182	S01AX18	Benzalkonium |Povidone	FALSE	TRUE
1428	betamethasone+fusidic acid	25	betamethasone+fusidic acid	1140882774	D07CC01	Betamethasone |Fusidic Acid	FALSE	TRUE
1429	tenoretic tablet	25	tenoretic tablet	1140860328	C07CB03	Chlorthalidone |Atenolol	FALSE	TRUE
1430	digitoxin	25	digitoxin	1140865990	C01AA04	Digitoxin	FALSE	TRUE
1431	progynova ts 50 50micrograms patch	25	progynova ts 50 50micrograms patch	1141180580	G03CA03	Estradiol	FALSE	TRUE
1432	tambocor 50mg tablet	25	tambocor 50mg tablet	1140866654	C01BC04	Flecainide	FALSE	TRUE
1433	sofradex eye/ear drops	25	sofradex eye/ear drops	1140882724	S03CA01	Gramicidin D |Framycetin |Dexamethasone	FALSE	TRUE
1434	nizoral 2% cream	25	nizoral 2% cream	1140880306	D01AC08	Ketoconazole	FALSE	TRUE
1435	alomide eye drops	25	alomide eye drops	1140878060	S01GX05	Lodoxamide	FALSE	TRUE
1436	asilone liquid	25	asilone liquid	1140881422	A02AF	Magnesium Oxide |Aluminum Hydroxide |Dimethicone	FALSE	TRUE
1437	niquitin cq 2mg mint lozenge	25	niquitin cq 2mg mint lozenge	1141188524	N07BA01	Nicotine	FALSE	TRUE
1438	novofem tablet	25	novofem tablet	1141180766	G03FB05	Norethisterone |Estradiol	FALSE	TRUE
1439	feldene 0.5% gel	25	feldene 0.5% gel	1140877954	M02AA07	Piroxicam	FALSE	TRUE
1440	surmontil 10mg tablet	25	surmontil 10mg tablet	1140867758	N06AA06	Trimipramine	FALSE	TRUE
1441	pharmaton capsule	25						TRUE
1442	beta-adalat capsule	24	beta-adalat capsule	1140860356	C07FB03	Atenolol |Nifedipine	FALSE	TRUE
1443	bezafibrate product	24	bezafibrate product	1141157260	C10AB02	Bezafibrate	FALSE	TRUE
1444	celectol 200mg tablet	24	celectol 200mg tablet	1140860498	C07AB08	Celiprolol	FALSE	TRUE
1445	modalim 100mg tablet	24	modalim 100mg tablet	1140862028	C10AB08	Ciprofibrate	FALSE	TRUE
1446	hydrocortisyl 1% cream	24	hydrocortisyl 1% cream	1140888630	D07AA02	Hydrocortisone	FALSE	TRUE
1447	isib 20mg tablet	24	isib 20mg tablet	1140860994	C01DA14	Isosorbide Mononitrate	FALSE	TRUE
1448	oramorph 10mg/5ml oral unit dose vial	24	oramorph 10mg/5ml oral unit dose vial	1140871778	N02AA01	Morphine	FALSE	TRUE
1449	clobetasone butyrate+neomycin sulphate	24	clobetasone butyrate+neomycin sulphate	1140882708	S01CA11	Neomycin |Clobetasone	FALSE	TRUE
1450	paroven 250mg capsule	24	paroven 250mg capsule	1140861416	C05CA51	Oxerutins	FALSE	TRUE
1451	pethidine	24	pethidine	1140884388	N02AB02	Pethidine	FALSE	TRUE
1452	pholcodine	24	pholcodine	1140862886	R05DA08	Pholcodine	FALSE	TRUE
1453	senokot hi-fibre lemon 3.5g/sachet s/f granules	24	senokot hi-fibre lemon 3.5g/sachet s/f granules	1141200498	A06AC01	Plantago Seed	FALSE	TRUE
1454	sulphur product	24	sulphur product	1140880056	D10AB02	Sulfur	FALSE	TRUE
1455	solpadeine plus tablet	23	solpadeine plus tablet	1141189010	N02AJ09	Caffeine |Acetaminophen |Codeine	FALSE	TRUE
1456	veganin tablet	23	veganin tablet	1140856348	N02AJ09	Caffeine |Acetaminophen |Codeine	TRUE	TRUE
1457	duac once daily gel	23	duac once daily gel	1141188766	D10AF51	Clindamycin |Benzoyl Peroxide	FALSE	TRUE
1458	proctofoam hc foam	23	proctofoam hc foam	1140881444	A07EA02	Hydrocortisone |Pramocaine	FALSE	TRUE
1459	neo-cytamen 250micrograms/1ml injection	23	neo-cytamen 250micrograms/1ml injection	1140858448	B03BA03	Hydroxocobalamin	FALSE	TRUE
1460	powergel 2.5% gel	23	powergel 2.5% gel	1140921844	M02AA10	Ketoprofen	FALSE	TRUE
1461	trinordiol tablet	23	trinordiol tablet	1140869190	G03AB03	Levonorgestrel |Ethinyl Estradiol	FALSE	TRUE
1462	sebomin mr 100mg m/r capsule	23	sebomin mr 100mg m/r capsule	1141191010	J01AA08	Minocycline	FALSE	TRUE
1463	utovlan 5mg tablet	23	utovlan 5mg tablet	1140868586	L02AB	Norethisterone	FALSE	TRUE
1464	propylthiouracil	23	propylthiouracil	1140874776	H03BA02	Propylthiouracil	FALSE	TRUE
1465	renagel 403mg capsule	23	renagel 403mg capsule	1141175196	V03AE02	Sevelamer	FALSE	TRUE
1466	gopten 500micrograms capsule	23	gopten 500micrograms capsule	1140860912	C09AA10	Trandolapril	FALSE	TRUE
1467	dioralyte product	23						TRUE
1468	zerobase cream	23						TRUE
1469	cafergot tablet	22	cafergot tablet	1140872050	N02CA52	Caffeine |Ergotamine	FALSE	TRUE
1470	cuprofen plus tablet	22	cuprofen plus tablet	1141190952	N02AJ08	Codeine |Ibuprofen	FALSE	TRUE
1471	dantrolene	22	dantrolene	1140883858	M03CA01	Dantrolene	FALSE	TRUE
1472	isopto plain 0.5% eye drops	22	isopto plain 0.5% eye drops	1140878174	S01XA20	Hypromellose	FALSE	TRUE
1473	influenza vaccine	22	influenza vaccine	1140880680	J07BB	Influenza Vaccine	FALSE	TRUE
1474	meptid 200mg tablet	22	meptid 200mg tablet	1140881028	N02AX05	Meptazinol Hydrochloride	FALSE	TRUE
1475	provigil 100mg tablet	22	provigil 100mg tablet	1141163118	N06BA07	Modafinil	FALSE	TRUE
1476	mst continus 100mg m/r tablet	22	mst continus 100mg m/r tablet	1140871786	N02AA01	Morphine	FALSE	TRUE
1477	napratec tablet combination pack	22	napratec tablet combination pack	1140871638	M01AE56	Naproxen |Misoprostol	FALSE	TRUE
1478	penicillamine	22	penicillamine	1140875316	M01CC01	Penicillamine	FALSE	TRUE
1479	augmentin 625mg tablet	21	augmentin 625mg tablet	1140872734	J01CR02	Amoxicillin |Clavulanate	FALSE	TRUE
1480	solpadeine headache tablet	21	solpadeine headache tablet	1141189066	N02BE51	Caffeine |Acetaminophen	FALSE	TRUE
1481	cromolyn sodium	21	cromolyn sodium	1140910736	A07EB01 |D11AH03 |R01AC01 |R03BC01 |S01GX01	Cromoglicic Acid	FALSE	TRUE
1482	flavoxate	21	flavoxate	1140883914	G04BD02	Flavoxate	FALSE	TRUE
1483	cutivate 0.05% cream	21	cutivate 0.05% cream	1140864820	D07AC	Fluticasone Propionate	FALSE	TRUE
1484	tri-adcortyl otic ear ointment	21	tri-adcortyl otic ear ointment	1140876104	S02CA04	Gramicidin D |Triamcinolone |Nystatin |Neomycin	FALSE	TRUE
1485	capozide tablet	21	capozide tablet	1140881714	C09BA01	Hydrochlorothiazide |Captopril	FALSE	TRUE
1486	chemydur 60xl m/r tablet	21	chemydur 60xl m/r tablet	1141166858	C01DA14	Isosorbide Mononitrate	FALSE	TRUE
1487	acular 0.5% ophthalmic solution	21	acular 0.5% ophthalmic solution	1140927354	S01BC05	Ketorolac	FALSE	TRUE
1488	ketotifen	21	ketotifen	1140862668	R06AX17 |S01GX08	Ketotifen	FALSE	TRUE
1489	leuprorelin	21	leuprorelin	1140884544	L02AE02	Leuprolide	FALSE	TRUE
1490	hydromol emollient bath additive	21	hydromol emollient bath additive	1140878252	D02A	Light Mineral Oil |Isopropyl Myristate	FALSE	TRUE
1491	ultrabase cream	21	ultrabase cream	1140878280	D02A	Mineral Oil |Petrolatum	FALSE	TRUE
1492	zyprexa 2.5mg tablet	21	zyprexa 2.5mg tablet	1141167976	N05AH03	Olanzapine	FALSE	TRUE
1493	oxerutins 250mg capsule	21	oxerutins 250mg capsule	1140861418	C05CA51	Oxerutins	FALSE	TRUE
1494	feldene 10mg capsule	21	feldene 10mg capsule	1140871672	M01AC01	Piroxicam	FALSE	TRUE
1495	sterculia	21	sterculia	1140865778	A06AC03	Sterculia	FALSE	TRUE
1496	antepsin 1g tablet	21	antepsin 1g tablet	1140865538	A02BX02	Sucralfate	FALSE	TRUE
1497	tryptophan product	21	tryptophan product	1140867960	N06AX02	Tryptophan	FALSE	TRUE
1498	acemetacin	20	acemetacin	1140875278	M01AB11	Acemetacin	FALSE	TRUE
1499	beechams powder	20	beechams powder	1140911760	N02BA51	Caffeine |Acetylsalicylic Acid	FALSE	TRUE
1500	chloramphenicol eye drops	20	chloramphenicol eye drops	1140853186	S01AA01	Chloramphenicol	FALSE	TRUE
1501	codeine linctus	20	codeine linctus	1140884452	R05DA04	Codeine	FALSE	TRUE
1502	disodium cromoglycate	20	disodium cromoglycate	1140910734	A07EB01 |D11AH03 |R01AC01 |R03BC01 |S01GX01	Cromoglicic Acid	FALSE	TRUE
1503	fluocinolone	20	fluocinolone	1140884676	C05AA10 |D07AC04 |S01BA15 |S02BA08	Fluocinolone Acetonide	FALSE	TRUE
1504	oruvail 100 m/r capsule	20	oruvail 100 m/r capsule	1140871522	M01AE03	Ketoprofen	FALSE	TRUE
1505	unguentum merck cream	20	unguentum merck cream	1140878288	D02A	No Active Ingredients	FALSE	TRUE
1506	norethisterone product	20	norethisterone product	1141157406	G03AC01 |G03DC02	Norethisterone	FALSE	TRUE
1507	oxytetramix 250 tablet	20	oxytetramix 250 tablet	1140873564	J01AA06	Oxytetracycline	FALSE	TRUE
1508	hypovase 500mcg tablet	20	hypovase 500mcg tablet	1140860580	C02CA01	Prazosin	FALSE	TRUE
1509	mepacrine	20	mepacrine	1140884326	P01AX05	Quinacrine	FALSE	TRUE
1510	acebutolol	19	acebutolol	1140866724	C07AB04	Acebutolol	FALSE	TRUE
1511	zimbacol xl 400mg m/r tablet	19	zimbacol xl 400mg m/r tablet	1141171548	C10AB02	Bezafibrate	FALSE	TRUE
1512	propain tablet	19	propain tablet	1140856436	N02AJ09	Caffeine |Acetaminophen |Codeine |Diphenhydramine	FALSE	TRUE
1513	cya - cyclosporin	19	cya - cyclosporin	1140910382	L04AD01 |S01XA18	Cyclosporine	FALSE	TRUE
1514	vaniqa 11.5% cream	19	vaniqa 11.5% cream	1141200094	D11AX16	Eflornithine	FALSE	TRUE
1515	famotidine	19	famotidine	1140865608	A02BA03	Famotidine	FALSE	TRUE
1516	durogesic 50micrograms/hour patch	19	durogesic 50micrograms/hour patch	1140911832	N02AB03	Fentanyl	FALSE	TRUE
1517	froben 50mg tablet	19	froben 50mg tablet	1140871238	M01AE09	Flurbiprofen	FALSE	TRUE
1518	ferrograd folic filmtab	19	ferrograd folic filmtab	1140870316	B03AD03	Folic Acid |Ferrous Sulfate	FALSE	TRUE
1519	heparin	19	heparin	1140881842	B01AB01 |C05BA03 |S01XA14	Heparin	FALSE	TRUE
1520	interferon beta-1a	19	interferon beta-1a	1141150594	L03AB07	Interferon Beta-1A	FALSE	TRUE
1521	oruvail gel	19	oruvail gel	1140877894	M02AA10	Ketoprofen	FALSE	TRUE
1522	megestrol	19	megestrol	1140884706	G03AC05 |G03DB02 |L02AB01	Megestrol Acetate	FALSE	TRUE
1523	clobetasol propionate+neomycin sulphate+nystatin	19	clobetasol propionate+neomycin sulphate+nystatin	1140882794	D07CD01	Nystatin |Neomycin |Clobetasol Propionate	FALSE	TRUE
1524	oxycontin 5mg m/r tablet	19	oxycontin 5mg m/r tablet	1141180792	N02AA05	Oxycodone	FALSE	TRUE
1525	brexidol 20mg tablet	19	brexidol 20mg tablet	1141169530	M01AC01	Piroxicam	FALSE	TRUE
1526	fybozest orange 3.5g s/f granules	19	fybozest orange 3.5g s/f granules	1141145830	A06AC	Plantago Seed	FALSE	TRUE
1527	rifampicin	19	rifampicin	1140874056	J04AB02	Rifampicin	FALSE	TRUE
1528	phosphate-sandoz tablet	19	phosphate-sandoz tablet	1140870900	B05XA09	Sodium Phosphate	FALSE	TRUE
1529	accolate 20mg tablet	19	accolate 20mg tablet	1141168344	R03DC01	Zafirlukast	FALSE	TRUE
1530	campral ec 333mg e/c tablet	18	campral ec 333mg e/c tablet	1140926994	N07BB03	Acamprosate	FALSE	TRUE
1531	preservex 100mg tablet	18	preservex 100mg tablet	1140925808	M02AA25	Aceclofenac	FALSE	TRUE
1532	kapake 30/500 effervescent tablet	18	kapake 30/500 effervescent tablet	1141190656	N02AJ06	Acetaminophen |Codeine	FALSE	TRUE
1533	migraleve yellow tablet	18	migraleve yellow tablet	1140872030	N02AJ06	Acetaminophen |Codeine	TRUE	TRUE
1534	maalox tablet	18	maalox tablet	1140865358	A02A	Aluminum Hydroxide |Magnesium Hydroxide |Simethicone	FALSE	TRUE
1535	frisium 10mg capsule	18	frisium 10mg capsule	1140863272	N05BA09	Clobazam	FALSE	TRUE
1536	carbo-dome cream	18	carbo-dome cream	1140878350	D05AA	Coal Tar	FALSE	TRUE
1537	codis dispersible tablet	18	codis dispersible tablet	1140856336	N02AJ07	Codeine |Acetylsalicylic Acid	FALSE	TRUE
1538	hay-crom eye drops	18	hay-crom eye drops	1140909484	S01GX01	Cromoglicic Acid	FALSE	TRUE
1539	danazol	18	danazol	1140868968	G03XA01	Danazol	FALSE	TRUE
1540	desmospray 10micrograms nasal spray	18	desmospray 10micrograms nasal spray	1140868820	H01BA02	Desmopressin	FALSE	TRUE
1541	presinex 10micrograms nasal spray	18	presinex 10micrograms nasal spray	1141188880	H01BA02	Desmopressin	TRUE	TRUE
1542	diethylstilbestrol	18	diethylstilbestrol	1140909848	G03CB02 |G03CC05 |L02AA01	Diethylstilbestrol	FALSE	TRUE
1543	digoxin product	18	digoxin product	1140865966	C01AA05	Digoxin	FALSE	TRUE
1544	evening primrose oil 20% cream	18	evening primrose oil 20% cream	1141193140	D11AX02	Evening Primrose Oil	FALSE	TRUE
1545	vioform hydrocortisone cream	18	vioform hydrocortisone cream	1140882836	D07CA01	Hydrocortisone |Clioquinol	FALSE	TRUE
1546	artelac 0.32% single-use eye drops	18	artelac 0.32% single-use eye drops	1141165028	S01XA20	Hypromellose	FALSE	TRUE
1547	minocin 50mg tablet	18	minocin 50mg tablet	1140873482	J01AA08	Minocycline	FALSE	TRUE
1548	binovum tablet	18	binovum tablet	1140869254	G03AA05	Norethisterone |Ethinyl Estradiol	FALSE	TRUE
1549	norimin tablet	18	norimin tablet	1140869260	G03AA05	Norethisterone |Ethinyl Estradiol	TRUE	TRUE
1550	ovysmen tablet	18	ovysmen tablet	1140869262	G03AA05	Norethisterone |Ethinyl Estradiol	TRUE	TRUE
1551	norfloxacin	18	norfloxacin	1140874178	J01MA06 |S01AE02	Norfloxacin	FALSE	TRUE
1552	ofloxacin	18	ofloxacin	1140874160	J01MA01 |S01AE01 |S02AA16	Ofloxacin	FALSE	TRUE
1553	oxprenolol	18	oxprenolol	1140879830	C07AA02	Oxprenolol	FALSE	TRUE
1554	oxycontin 40mg m/r tablet	18	oxycontin 40mg m/r tablet	1141171052	N02AA05	Oxycodone	FALSE	TRUE
1555	pergolide	18	pergolide	1140879660	N04BC02	Pergolide	FALSE	TRUE
1556	e45 lotion	18	e45 lotion	1140916948	D02AC	Petrolatum |Lanolin |Light Mineral Oil	FALSE	TRUE
1557	elidel 1% cream	18	elidel 1% cream	1141187336	D11AH02	Pimecrolimus	FALSE	TRUE
1558	movelat relief gel	18	movelat relief gel	1140925930	M02AC	Salicylic Acid |Mucopolysaccharide Polysulfate	FALSE	TRUE
1559	sulindac	18	sulindac	1140871604	M01AB02	Sulindac	FALSE	TRUE
1560	eucerin 10% cream	18	eucerin 10% cream	1141164836	D02A	Urea	FALSE	TRUE
1561	ferrograd-c filmtab	18	ferrograd-c filmtab	1140858300	A11JB	Vitamin C |Ferrous Sulfate	FALSE	TRUE
1562	distalgesic tablet	17	distalgesic tablet	1140868260	N02AJ	Acetaminophen |Dextropropoxyphene	FALSE	TRUE
1563	apomorphine	17	apomorphine	1140879648	N04BC07 |G04BE07	Apomorphine	FALSE	TRUE
1564	conotrane cream	17	conotrane cream	1140878290	D08AJ01	Benzalkonium |Dimethicone	FALSE	TRUE
1565	zyban 150mg m/r tablet	17	zyban 150mg m/r tablet	1141176858	N06AX12	Bupropion	FALSE	TRUE
1566	propain caplet	17	propain caplet	1141172966	N02AJ09	Caffeine |Acetaminophen |Codeine |Diphenhydramine	FALSE	TRUE
1567	phosex 1g tablet	17	phosex 1g tablet	1141167308	V03AE	Calcium Acetate	FALSE	TRUE
1568	chloramiphene	17	chloramiphene	1140910372	D06AX02 |D10AF03 |G01AA05 |J01BA01 |S01AA01 |S02AA01 |S03AA08	Chloramphenicol	FALSE	TRUE
1569	polytar plus liquid	17	polytar plus liquid	1140878504	D05AA	Coal Tar	FALSE	TRUE
1570	aveeno lotion	17	aveeno lotion	1141185108	D05AA	Colloidal Oatmeal	FALSE	TRUE
1571	antabuse 200mg tablet	17	antabuse 200mg tablet	1140872484	N07BB01	Disulfiram	FALSE	TRUE
1572	enoxaparin	17	enoxaparin	1140861588	B01AB05	Enoxaparin	FALSE	TRUE
1573	ovestin 250micrograms tablet	17	ovestin 250micrograms tablet	1140857704	G03CA04	Estriol	FALSE	TRUE
1574	glutamic acid product	17	glutamic acid product	1140881346	A09AB01	Glutamic Acid	FALSE	TRUE
1575	bondronat 50mg tablet	17	bondronat 50mg tablet	1141190534	M05BA06	Ibandronate	FALSE	TRUE
1576	ketorolac	17	ketorolac	1140884558	M01AB15 |S01BC05	Ketorolac	FALSE	TRUE
1577	l-carnitine product	17	l-carnitine product	1140910854	A16AA01	L-Carnitine	FALSE	TRUE
1578	oilatum bath formula liquid bath additive 300ml	17	oilatum bath formula liquid bath additive 300ml	1141200882	D02A	Light Mineral Oil	FALSE	TRUE
1579	imodium plus 2mg/125mg chewable tablet	17	imodium plus 2mg/125mg chewable tablet	1141166998	A07DA53	Loperamide |Simethicone	FALSE	TRUE
1580	decongestant 0.05% nasal spray	17	decongestant 0.05% nasal spray	1140927812	R01AA05	Oxymetazoline	FALSE	TRUE
1581	phenindione	17	phenindione	1140861702	B01AA02	Phenindione	FALSE	TRUE
1582	sodium picosulphate	17	sodium picosulphate	1140865724	A06AB08	Picosulfuric Acid	FALSE	TRUE
1583	prindolol	17	prindolol	1140910614	C07AA17	Pindolol	FALSE	TRUE
1584	clopixol 2mg tablet	17	clopixol 2mg tablet	1140867342	N05AF05	Zuclopenthixol	FALSE	TRUE
1585	zuclopenthixol	17	zuclopenthixol	1140882100	N05AF05	Zuclopenthixol	TRUE	TRUE
1586	artificial saliva	17						TRUE
1587	optrex eye drops	17						TRUE
1588	alka-seltzer tablet	16	alka-seltzer tablet	1140917114	N02BA51	Acetylsalicylic Acid |Sodium Bicarbonate |Citric Acid	FALSE	TRUE
1589	mucogel suspension	16	mucogel suspension	1140865368	A02A	Aluminum Hydroxide |Magnesium Hydroxide	FALSE	TRUE
1590	iopidine ophthalmic 0.5% intra-ocular solution	16	iopidine ophthalmic 0.5% intra-ocular solution	1140921818	S01EA03	Apraclonidine	FALSE	TRUE
1591	kalten capsule	16	kalten capsule	1140860398	C07DB01	Atenolol |Amiloride |Hydrochlorothiazide	FALSE	TRUE
1592	benzoyl peroxide product	16	benzoyl peroxide product	1140880040	D10AE01	Benzoyl Peroxide	FALSE	TRUE
1593	paracetamol+caffeine	16	paracetamol+caffeine	1140884404	N02BE51	Caffeine |Acetaminophen	FALSE	TRUE
1594	largactil 10mg tablet	16	largactil 10mg tablet	1140863416	N05AA01	Chlorpromazine	FALSE	TRUE
1595	clodronate disodium	16	clodronate disodium	1140910728	M05BA02	Clodronic Acid	FALSE	TRUE
1596	diazepam product	16	diazepam product	1141157496	N05BA01	Diazepam	FALSE	TRUE
1597	durogesic 75micrograms/hour patch	16	durogesic 75micrograms/hour patch	1140911834	N02AB03	Fentanyl	FALSE	TRUE
1598	fluorouracil	16	fluorouracil	1140869772	L01BC02	Fluorouracil	FALSE	TRUE
1599	pregaday tablet	16	pregaday tablet	1140870328	B03AD03	Folic Acid |Iron	FALSE	TRUE
1600	glucagon product	16	glucagon product	1140874826	H04AA01	Glucagon Recombinant	FALSE	TRUE
1601	acidol-pepsin tablet	16	acidol-pepsin tablet	1140851314	A09A	Glycine Betaine |Pepsin	FALSE	TRUE
1602	indometacin product	16	indometacin product	1141181656	C01EB03 |M01AB01 |M02AA23 |S01BC01	Indomethacin	FALSE	TRUE
1603	levonorgestrel product	16	levonorgestrel product	1141157410	G03AC03 |G03AD01	Levonorgestrel	FALSE	TRUE
1604	mupirocin	16	mupirocin	1140880342	D06AX09 |R01AX06	Mupirocin	FALSE	TRUE
1605	nadolol	16	nadolol	1140860192	C07AA12	Nadolol	FALSE	TRUE
1606	naproxen+misoprostol	16	naproxen+misoprostol	1140881612	M01AE56	Naproxen |Misoprostol	FALSE	TRUE
1607	oxymetazoline 500micrograms/ml nasal spray	16	oxymetazoline 500micrograms/ml nasal spray	1140853978	R01AA05	Oxymetazoline	FALSE	TRUE
1608	pancreatin	16	pancreatin	1140866022	A09AA02	Pancrelipase	FALSE	TRUE
1609	salicylic acid	16	salicylic acid	1140880014	D01AE12 |S01BC08	Salicylic Acid	FALSE	TRUE
1610	movelat relief cream	16	movelat relief cream	1140925936	M02AC	Salicylic Acid |Mucopolysaccharide Polysulfate	FALSE	TRUE
1611	acidex oral suspension	16	acidex oral suspension	1141172224	A02BX13	Sodium Bicarbonate |Calcium Carbonate |Alginic Acid	FALSE	TRUE
1612	somatropin	16	somatropin	1140868644	H01AC01	Somatropin Recombinant	FALSE	TRUE
1613	soya oil 84.75% bath oil	16	soya oil 84.75% bath oil	1140876498	D02A	Soya Oil	FALSE	TRUE
1614	tenoxicam	16	tenoxicam	1140875346	M01AC02	Tenoxicam	FALSE	TRUE
1615	torasemide	16	torasemide	1140888496	C03CA04	Torasemide	FALSE	TRUE
1616	tranylcypromine	16	tranylcypromine	1140867914	N06AF04	Tranylcypromine	FALSE	TRUE
1617	solvazinc 200mg effervescent tablet	16	solvazinc 200mg effervescent tablet	1140870840	A12CB01	Zinc Sulfate	FALSE	TRUE
1618	as saliva orthana spray	16						TRUE
1619	saliveze spray	16						TRUE
1620	wheat fibre 80% powder	16						TRUE
1621	midrid capsule	15	midrid capsule	1140871966	N02BE51	Acetaminophen |Isometheptene	FALSE	TRUE
1622	zovirax 3% eye ointment	15	zovirax 3% eye ointment	1140875552	S01AD03	Aciclovir	FALSE	TRUE
1623	moduret 25 tablet	15	moduret 25 tablet	1140866416	C03EA01	Amiloride |Hydrochlorothiazide	FALSE	TRUE
1624	amphotericin	15	amphotericin	1140874240	A01AB04 |A07AA07 |G01AA03 |J02AA01	Amphotericin B	FALSE	TRUE
1625	burinex a tablet	15	burinex a tablet	1140866356	C03CA02	Bumetanide	FALSE	TRUE
1626	zacin 0.025% cream	15	zacin 0.025% cream	1141166748	M02AB01	Capsaicin	FALSE	TRUE
1627	tagamet 100 tablet	15	tagamet 100 tablet	1140909500	A02BA01	Cimetidine	FALSE	TRUE
1628	clindamycin product	15	clindamycin product	1141157358	D10AF01 |G01AA10 |J01FF01	Clindamycin	FALSE	TRUE
1629	co-danthrusate	15	co-danthrusate	1140881624	A06AG10	Danthron |Docusate	FALSE	TRUE
1630	indomethacin product	15	indomethacin product	1141157452	C01EB03 |M01AB01 |M02AA23 |S01BC01	Indomethacin	FALSE	TRUE
1631	itraconazole 100mg capsule	15	itraconazole 100mg capsule	1140874304	J02AC02	Itraconazole	FALSE	TRUE
1632	norplant 38mg subdermal implant	15	norplant 38mg subdermal implant	1140864172	G03AC03	Levonorgestrel	FALSE	TRUE
1633	e45 emollient bath oil	15	e45 emollient bath oil	1141162940	D02A	Mineral Oil |Cetyl Dimeticone	FALSE	TRUE
1634	oramorph sr 10mg m/r tablet	15	oramorph sr 10mg m/r tablet	1140871712	N02AA01	Morphine	FALSE	TRUE
1635	bactroban 2% nasal ointment	15	bactroban 2% nasal ointment	1140916846	D06AX09	Mupirocin	FALSE	TRUE
1636	praxilene 100mg capsule	15	praxilene 100mg capsule	1140861434	C04AX21	Naftidrofuryl Oxalate	FALSE	TRUE
1637	nystatin+chlorhexidine hydrochloride 100000units/1%/g cream	15	nystatin+chlorhexidine hydrochloride 100000units/1%/g cream	1140880390	D08AC02	Nystatin |Chlorhexidine	FALSE	TRUE
1638	ditropan xl 5mg m/r tablet	15	ditropan xl 5mg m/r tablet	1141177080	G04BD04	Oxybutynin	FALSE	TRUE
1639	norditropin(epr) 12iu(4mg) injection (pdr for recon)+diluent	15	norditropin(epr) 12iu(4mg) injection (pdr for recon)+diluent	1140868650	H01AC01	Somatropin Recombinant	FALSE	TRUE
1640	metatone tonic	15	metatone tonic	1140852996	A11EC	Thiamine |Sodium Glycerophosphate |Calcium Glycerophosphate |Manganese Glycerophosphate	FALSE	TRUE
1641	cyklokapron 500mg tablet	15	cyklokapron 500mg tablet	1140861834	B02AA02	Tranexamic Acid	FALSE	TRUE
1642	urea 10% cream	15	urea 10% cream	1140876430	D02A	Urea	FALSE	TRUE
1643	bioxtra oral gel	15						TRUE
1644	cough/decongestant preparation	15						TRUE
1645	indigestion remedy (over the counter)	15						TRUE
1646	methenamine hippurate	15						TRUE
1647	migramax sachet powder	14	migramax sachet powder	1141175756	N02BA51	Acetylsalicylic Acid |Metoclopramide	FALSE	TRUE
1648	clearsore aciclovir 5% cream	14	clearsore aciclovir 5% cream	1141186288	D06BB03	Aciclovir	FALSE	TRUE
1649	temgesic 400mcg sublingual tablet	14	temgesic 400mcg sublingual tablet	1140871738	N02AE01	Buprenorphine	FALSE	TRUE
1650	bupropion	14	bupropion	1141176854	N06AX12	Bupropion	FALSE	TRUE
1651	axsain cream	14	axsain cream	1140875628	M02AB01	Capsaicin	FALSE	TRUE
1652	avloclor 250mg tablet	14	avloclor 250mg tablet	1140874484	P01BA01	Chloroquine	FALSE	TRUE
1653	polytar emollient bath additive	14	polytar emollient bath additive	1140878426	D05AA	Coal Tar	FALSE	TRUE
1654	colestipol	14	colestipol	1140888590	C10AC02	Colestipol	FALSE	TRUE
1655	dicyclomine hydrochloride	14	dicyclomine hydrochloride	1140865378	A03AA07	Dicyclomine	FALSE	TRUE
1656	df118 30mg tablet	14	df118 30mg tablet	1140856454	N02AA08	Dihydrocodeine	FALSE	TRUE
1657	etonogestrel	14	etonogestrel	1141166196	G03AC08	Etonogestrel	FALSE	TRUE
1658	hiprex 1g tablet	14	hiprex 1g tablet	1140874216	J01XX05	Hexamethylenetetramine	FALSE	TRUE
1659	hc - hydrocortisone	14	hc - hydrocortisone	1140910424	D07AA02	Hydrocortisone	FALSE	TRUE
1660	calmurid hc cream	14	calmurid hc cream	1140882820	D07XA	Hydrocortisone |Lactic Acid |Urea	FALSE	TRUE
1661	aldara 5% cream	14	aldara 5% cream	1141167876	D06BB10	Imiquimod	FALSE	TRUE
1662	sporanox 100mg capsule	14	sporanox 100mg capsule	1140874306	J02AC02	Itraconazole	FALSE	TRUE
1663	milk of magnesia suspension	14	milk of magnesia suspension	1140881550	A02AA	Magnesium Hydroxide	FALSE	TRUE
1664	megace 40mg tablet	14	megace 40mg tablet	1140870232	L02AB01	Megestrol Acetate	FALSE	TRUE
1665	human menopausal gonadotrophins	14	human menopausal gonadotrophins	1140882962	G03GA02	Menotropins	FALSE	TRUE
1666	mst continus 60mg m/r tablet	14	mst continus 60mg m/r tablet	1140871782	N02AA01	Morphine	FALSE	TRUE
1667	neomycin product	14	neomycin product	1140884090	A01AB08 |A07AA01 |B05CA09 |D06AX04 |J01GB05 |R02AB01 |S01AA03 |S02AA07 |S03AA01	Neomycin	FALSE	TRUE
1668	lopinavir+ritonavir	14	lopinavir+ritonavir	1141173910	J05AR10	Ritonavir |Lopinavir	FALSE	TRUE
1669	myocrisin 50mg/0.5ml injection	14	myocrisin 50mg/0.5ml injection	1140875308	M01CB01	Sodium Aurothiomalate	FALSE	TRUE
1670	micralax micro-enema	14	micralax micro-enema	1140883076	A06AG11	Sorbitol |Sodium Citrate |Sodium Alkyldulphoacetate |Sorbic Acid	FALSE	TRUE
1671	lamisil at 1% cream	14	lamisil at 1% cream	1141172910	D01AE15	Terbinafine	FALSE	TRUE
1672	surgam 200mg tablet	14	surgam 200mg tablet	1140871616	M01AE11	Tiaprofenic Acid	FALSE	TRUE
1673	anugesic-hc cream	14						TRUE
1674	fragmin 10,000iu/1ml injection	14						TRUE
1675	gold product	14						TRUE
1676	interferons	14						TRUE
1677	librofem 200mg tablet	14						TRUE
1678	mecysteine	14						TRUE
1679	muse 125micrograms pellet	13	muse 125micrograms pellet	1141162982	G04BE01	Alprostadil	FALSE	TRUE
1680	transtec 35micrograms/hour transdermal patch	13	transtec 35micrograms/hour transdermal patch	1141180012	N02AE01	Buprenorphine	FALSE	TRUE
1681	balmosa cream	13	balmosa cream	1140875606	M02A	Camphor |Menthol |Methyl Salicylate |Capsicum Oleoresin	FALSE	TRUE
1682	capoten 12.5mg tablet	13	capoten 12.5mg tablet	1140860758	C09AA01	Captopril	FALSE	TRUE
1683	crampex tablet	13	crampex tablet	1141188530	A12AX	Cholecalciferol |Niacin |Calcium Gluconate	FALSE	TRUE
1684	canesten complete cream	13	canesten complete cream	1141186100	G01AF02	Clotrimazole	FALSE	TRUE
1685	colestid 5g/sachet granules	13	colestid 5g/sachet granules	1140861848	C10AC02	Colestipol	FALSE	TRUE
1686	conjugated oestrogens 0.3mg / medroxyprogesterone 1.5mg tab	13	conjugated oestrogens 0.3mg / medroxyprogesterone 1.5mg tab	1141190580	G03FA12	Conjugated Estrogens |Medroxyprogesterone Acetate	FALSE	TRUE
1687	didanosine	13	didanosine	1140888928	J05AF02	Didanosine	FALSE	TRUE
1688	eflornitine 11.5% cream	13	eflornitine 11.5% cream	1141200092	D11AX16	Eflornithine	FALSE	TRUE
1689	stiemycin solution	13	stiemycin solution	1140880142	D10AF02	Erythromycin	FALSE	TRUE
1690	pepcid ac indigestion tablet	13	pepcid ac indigestion tablet	1140909496	A02BA03	Famotidine	FALSE	TRUE
1691	haelan 0.0125% cream	13	haelan 0.0125% cream	1140888178	D07AC07	Flurandrenolide	FALSE	TRUE
1692	fosamprenavir	13	fosamprenavir	1141200344	J05AE07	Fosamprenavir	FALSE	TRUE
1693	dextrose 40% oral gel	13	dextrose 40% oral gel	1141165702	V06DC01	Glucose	FALSE	TRUE
1694	hydrea 500mg capsule	13	hydrea 500mg capsule	1140869980	L01XX05	Hydroxyurea	FALSE	TRUE
1695	ketopine 2% shampoo	13	ketopine 2% shampoo	1141192378	D01AC08	Ketoconazole	FALSE	TRUE
1696	carace 10 plus tablet	13	carace 10 plus tablet	1140864910	C09BA03	Lisinopril |Hydrochlorothiazide	FALSE	TRUE
1697	norimode 2mg tablet	13	norimode 2mg tablet	1140923568	A07DA03	Loperamide	FALSE	TRUE
1698	myfortic 180mg gastro-resistant tablet	13	myfortic 180mg gastro-resistant tablet	1141200450	L04AA06	Mycophenolic Acid	FALSE	TRUE
1699	relifex 500mg tablet	13	relifex 500mg tablet	1140875338	M01AX01	Nabumetone	FALSE	TRUE
1700	octreotide	13	octreotide	1140870200	H01CB02	Octreotide	FALSE	TRUE
1701	pentoxifylline	13	pentoxifylline	1140909712	C04AD03	Pentoxifylline	FALSE	TRUE
1702	proguanil	13	proguanil	1140884314	P01BB01	Proguanil	FALSE	TRUE
1703	rivastigmine	13	rivastigmine	1141167690	N06DA03	Rivastigmine	FALSE	TRUE
1704	saquinavir	13	saquinavir	1141145612	J05AE01	Saquinavir	FALSE	TRUE
1705	tacalcitol	13	tacalcitol	1140923728	D05AX04	Tacalcitol	FALSE	TRUE
1706	terfenadine	13	terfenadine	1140862830	R06AX12	Terfenadine	FALSE	TRUE
1707	tinzaparin	13	tinzaparin	1140888206	B01AB10	Tinzaparin	FALSE	TRUE
1708	tolfenamic acid	13	tolfenamic acid	1140928840	M01AG02	Tolfenamic Acid	FALSE	TRUE
1709	retin-a 0.025% cream	13	retin-a 0.025% cream	1140878546	D10AD01	Tretinoin	FALSE	TRUE
1710	actifed tablet	13	actifed tablet	1140863070	R01BA52	Triprolidine |Pseudoephedrine	FALSE	TRUE
1711	xipamide	13	xipamide	1140866108	C03BA10	Xipamide	FALSE	TRUE
1712	xylometazoline	13	xylometazoline	1140879852	R01AA07 |R01AB06 |S01GA03	Xylometazoline	FALSE	TRUE
1713	abacavir 300mg / lamivudine 150mg / zidovudine 300mg tablet	13	abacavir 300mg / lamivudine 150mg / zidovudine 300mg tablet	1141189662	J05AR04	Zidovudine |Lamivudine |Abacavir	FALSE	TRUE
1714	aspav dispersible tablet	13						TRUE
1715	benylin cough & congestion syrup	13						TRUE
1716	diuretic	13						TRUE
1717	ethambutolol	13						TRUE
1718	forsteo 250mcg/ml injection solution 3ml prefilled pen	13						TRUE
1719	dithrocream 0.1% cream	12	dithrocream 0.1% cream	1140878442	D05AC01	Anthralin	FALSE	TRUE
1720	skinoren cream	12	skinoren cream	1140878558	D10AX03	Azelaic Acid	FALSE	TRUE
1721	difflam 0.15% spray	12	difflam 0.15% spray	1140876174	M02AA05	Benzydamine	FALSE	TRUE
1722	cacit 1.25g effervescent tablet	12	cacit 1.25g effervescent tablet	1140877782	A12AA04	Calcium Carbonate	FALSE	TRUE
1723	calcium-sandoz syrup	12	calcium-sandoz syrup	1140870796	A12AA20	Calcium Glubionate |Calcium Lactobionate	FALSE	TRUE
1724	paludrine tablet+avloclor tablet 100mg/250mg travel pack	12	paludrine tablet+avloclor tablet 100mg/250mg travel pack	1141156738	P01B	Chloroquine |Proguanil	FALSE	TRUE
1725	clemastine	12	clemastine	1140862638	D04AA14 |R06AA04	Clemastine	FALSE	TRUE
1726	dalacin 2% cream	12	dalacin 2% cream	1140869142	G01AA10	Clindamycin	FALSE	TRUE
1727	canesten 2% vaginal cream	12	canesten 2% vaginal cream	1140869050	G01AF02	Clotrimazole	FALSE	TRUE
1728	colomycin 1million units injection (pdr for recon)	12	colomycin 1million units injection (pdr for recon)	1140873818	J01XB01	Colistimethate	FALSE	TRUE
1729	cyclopenthiazide	12	cyclopenthiazide	1140866156	C03AA07	Cyclopenthiazide	FALSE	TRUE
1730	desmopressin product	12	desmopressin product	1141157296	H01BA02	Desmopressin	FALSE	TRUE
1731	dexa-rhinaspray nasal spray	12	dexa-rhinaspray nasal spray	1140876164	R01AD53	Dexamethasone |Tramazoline	FALSE	TRUE
1732	ephedrine	12	ephedrine	1140883534	C01CA26 |R01AA03 |R01AB05 |R03CA02 |S01FB02	Ephedrine	FALSE	TRUE
1733	progynova ts 50micrograms patch	12	progynova ts 50micrograms patch	1140923914	G03CA03	Estradiol	FALSE	TRUE
1734	ethosuximide	12	ethosuximide	1140872160	N03AD01	Ethosuximide	FALSE	TRUE
1735	durogesic 100micrograms/hour patch	12	durogesic 100micrograms/hour patch	1140911836	N02AB03	Fentanyl	FALSE	TRUE
1736	fluphenazine	12	fluphenazine	1140882098	N05AB02	Fluphenazine	FALSE	TRUE
1737	rebif 44micrograms/0.5ml prefilled syringe	12	rebif 44micrograms/0.5ml prefilled syringe	1141189256	L03AB07	Interferon Beta-1A	FALSE	TRUE
1738	isoniazid	12	isoniazid	1140873986	J04AC01	Isoniazid	FALSE	TRUE
1739	ismo 10 tablet	12	ismo 10 tablet	1140860972	C01DA14	Isosorbide Mononitrate	FALSE	TRUE
1740	ketoconazole 2% cream	12	ketoconazole 2% cream	1140880308	D01AC08	Ketoconazole	FALSE	TRUE
1741	paraffin liquid	12	paraffin liquid	1140910522	A06AA01	Mineral Oil	FALSE	TRUE
1742	sevredol 20mg tablet	12	sevredol 20mg tablet	1140871704	N02AA01	Morphine	FALSE	TRUE
1743	zomorph 100mg m/r capsule	12	zomorph 100mg m/r capsule	1141152992	N02AA01	Morphine	TRUE	TRUE
1744	bactroban ointment	12	bactroban ointment	1140878526	D06AX09	Mupirocin	FALSE	TRUE
1745	sandostatin 50micrograms/1ml injection	12	sandostatin 50micrograms/1ml injection	1140870208	H01CB02	Octreotide	FALSE	TRUE
1746	dipentum 250mg capsule	12	dipentum 250mg capsule	1140865742	A07EC03	Olsalazine	FALSE	TRUE
1747	oxynorm 20mg capsule	12	oxynorm 20mg capsule	1141170966	N02AA05	Oxycodone	FALSE	TRUE
1748	pindolol	12	pindolol	1140860292	C07AA03	Pindolol	FALSE	TRUE
1749	triapin mite 2.5mg/2.5mg tablet	12	triapin mite 2.5mg/2.5mg tablet	1141165476	C09BB05	Ramipril |Felodipine	FALSE	TRUE
1750	vexol 1% eye drops	12	vexol 1% eye drops	1141166528	S01BA13	Rimexolone	FALSE	TRUE
1751	decapeptyl sr 3mg injection (pdr for recon)+diluent	12	decapeptyl sr 3mg injection (pdr for recon)+diluent	1141189852	L02AE04	Triptorelin	FALSE	TRUE
1752	accuretic tablet	12						TRUE
1753	bronchilator inhaler	12						TRUE
1754	calcium resonium powder	12						TRUE
1755	dermol cream 500g	12						TRUE
1756	diprobath bath additive	12						TRUE
1757	evacalm 2mg tablet	12						TRUE
1758	oralbalance oral gel	12						TRUE
1759	acipimox	11	acipimox	1140861892	C10AD06	Acipimox	FALSE	TRUE
1760	differin 0.1% cream	11	differin 0.1% cream	1141164598	D10AD03	Adapalene	FALSE	TRUE
1761	betamethasone+salicylic acid	11	betamethasone+salicylic acid	1140882622	D07XC01	Betamethasone |Salicylic Acid	FALSE	TRUE
1762	cephradine	11	cephradine	1140873258	J01DB09	Cefradine	FALSE	TRUE
1763	chloramphenicol 0.5%	11	chloramphenicol 0.5%	1140853188	S01AA01	Chloramphenicol	FALSE	TRUE
1764	atenolol+chlortalidone	11	atenolol+chlortalidone	1141180778	C07BB03	Chlorthalidone |Atenolol	FALSE	TRUE
1765	cinacalcet	11	cinacalcet	1141201418	H05BX01	Cinacalcet	FALSE	TRUE
1766	aspirin+codeine	11	aspirin+codeine	1140882392	N02AJ07	Codeine |Acetylsalicylic Acid	FALSE	TRUE
1767	co-codaprin	11	co-codaprin	1140923344	N02AJ07	Codeine |Acetylsalicylic Acid	TRUE	TRUE
1768	cyclopentolate	11	cyclopentolate	1140883518	S01FA04	Cyclopentolate	FALSE	TRUE
1769	dexedrine 5mg tablet	11	dexedrine 5mg tablet	1140867904	N06BA02	Dextroamphetamine	FALSE	TRUE
1770	relpax 20mg tablet	11	relpax 20mg tablet	1141185448	N02CC06	Eletriptan	FALSE	TRUE
1771	etidronate disodium	11	etidronate disodium	1140913322	M05BA01	Etidronic Acid	FALSE	TRUE
1772	disodium etidronate+calcium carbonate	11	disodium etidronate+calcium carbonate	1140882980	M05BB01	Etidronic Acid |Calcium Carbonate	FALSE	TRUE
1773	flucloxacillin product	11	flucloxacillin product	1141157340	J01CF05	Flucloxacillin	FALSE	TRUE
1774	5fu - fluorouracil	11	5fu - fluorouracil	1140910550	L01BC02	Fluorouracil	FALSE	TRUE
1775	galantamine	11	galantamine	1141171578	N06DA04	Galantamine	FALSE	TRUE
1776	calcitonin product	11	calcitonin product	1140868848	H05BA	Human Calcitonin	FALSE	TRUE
1777	eurax hc cream	11	eurax hc cream	1141151026	D04AX	Hydrocortisone |Crotamiton	FALSE	TRUE
1778	imiquimod	11	imiquimod	1141167814	D06BB10	Imiquimod	FALSE	TRUE
1779	interferon beta	11	interferon beta	1141172486	L03AB	Interferon Beta	FALSE	TRUE
1780	rebif 22micrograms/0.5ml prefilled syringe	11	rebif 22micrograms/0.5ml prefilled syringe	1141189254	L03AB07	Interferon Beta-1A	FALSE	TRUE
1781	lanreotide	11	lanreotide	1141167430	H01CB03	Lanreotide	FALSE	TRUE
1782	cetomacrogol formula a cream bp	11	cetomacrogol formula a cream bp	1140876408	D02A	Macrogol Cetostearyl Ether	FALSE	TRUE
1783	lariam 250mg tablet	11	lariam 250mg tablet	1140874498	P01BC02	Mefloquine	FALSE	TRUE
1784	mefloquine	11	mefloquine	1140874438	P01BC02	Mefloquine	TRUE	TRUE
1785	zydol soluble 50mg tablet	11	zydol soluble 50mg tablet	1140928372	N02AX02	Morphine	FALSE	TRUE
1786	tilade mint 2mg inhaler	11	tilade mint 2mg inhaler	1140862684	R03BC03	Nedocromil	FALSE	TRUE
1787	piportil depot 50mg/1ml oily injection	11	piportil depot 50mg/1ml oily injection	1140867572	N05AC04	Pipotiazine	FALSE	TRUE
1788	rimexolone	11	rimexolone	1141166524	S01BA13 |H02AB12	Rimexolone	FALSE	TRUE
1789	norvir 100mg capsule	11	norvir 100mg capsule	1140928392	J05AE03	Ritonavir	FALSE	TRUE
1790	aquadrate 10% cream	11	aquadrate 10% cream	1140878232	D02A	Urea	FALSE	TRUE
1791	calcium leucovorin 15mg tablet	11						TRUE
1792	care hayfever relief 50micrograms nasal spray	11						TRUE
1793	coc - combined oral contraceptives	11						TRUE
1794	condrotec tablet	11						TRUE
1795	daktarin 25mg/ml oral gel	11						TRUE
1796	natrasleep tablet	11						TRUE
1797	phorpain gel maximum strength 10% gel	11						TRUE
1798	paracetamol+metoclopramide 500mg/5mg tablet	10	paracetamol+metoclopramide 500mg/5mg tablet	1140872044	N02BE51	Acetaminophen |Metoclopramide	FALSE	TRUE
1799	zovirax 200mg tablet	10	zovirax 200mg tablet	1140874372	J05AB01	Aciclovir	FALSE	TRUE
1800	alprazolam	10	alprazolam	1140863308	N05BA12	Alprazolam	FALSE	TRUE
1801	topal tablet	10	topal tablet	1140865370	A02BX13	Aluminum Hydroxide |Magnesium Carbonate |Alginic Acid	FALSE	TRUE
1802	transtec 70micrograms/hour transdermal patch	10	transtec 70micrograms/hour transdermal patch	1141180020	N02AE01	Buprenorphine	FALSE	TRUE
1803	solpadeine forte dispersible tablet	10	solpadeine forte dispersible tablet	1140856340	N02AJ06	Caffeine |Acetaminophen |Codeine	FALSE	TRUE
1804	cefadroxil	10	cefadroxil	1140873098	J01DB05	Cefadroxil	FALSE	TRUE
1805	colestyramine+aspartame 4g/sachet powder	10	colestyramine+aspartame 4g/sachet powder	1141180722	C10AC01	Cholestyramine	FALSE	TRUE
1806	pletal 100mg tablet	10	pletal 100mg tablet	1141181154	B01AC23	Cilostazol	FALSE	TRUE
1807	effercitrate soluble tablet	10	effercitrate soluble tablet	1140869408	A12BA	Citric Acid |Potassium Bicarbonate	FALSE	TRUE
1808	dalacin t rollerball lotion	10	dalacin t rollerball lotion	1140880202	D10AF01	Clindamycin	FALSE	TRUE
1809	clozaril 25mg tablet	10	clozaril 25mg tablet	1140882320	N05AH02	Clozapine	FALSE	TRUE
1810	optrex allergy eye drops	10	optrex allergy eye drops	1141191774	S01GX01	Cromoglicic Acid	FALSE	TRUE
1811	darbepoetin alfa	10	darbepoetin alfa	1141178858	B03XA02	Darbepoetin Alfa	FALSE	TRUE
1812	dexamfetamine	10	dexamfetamine	1141180976	N06BA02	Dextroamphetamine	FALSE	TRUE
1813	dhc continus 120mg m/r tablet	10	dhc continus 120mg m/r tablet	1140871926	N02AA08	Dihydrocodeine	FALSE	TRUE
1814	erythrocin 250mg tablet	10	erythrocin 250mg tablet	1140873680	J01FA01	Erythromycin	FALSE	TRUE
1815	ethinylestradiol product	10	ethinylestradiol product	1141181218	G03CA01 |L02AA03	Ethinyl Estradiol	FALSE	TRUE
1816	famciclovir	10	famciclovir	1140864424	S01AD07 |J05AB09	Famciclovir	FALSE	TRUE
1817	fludarabine	10	fludarabine	1140910876	L01BB05	Fludarabine	FALSE	TRUE
1818	sterculia+frangula 62%/8% granules	10	sterculia+frangula 62%/8% granules	1140865780	A06AB57	Frangula |Sterculia	FALSE	TRUE
1819	reminyl 4mg tablet	10	reminyl 4mg tablet	1141171482	N06DA04	Galantamine	FALSE	TRUE
1820	indocid 25mg capsule	10	indocid 25mg capsule	1140871354	M01AB01	Indomethacin	FALSE	TRUE
1821	steri-neb ipratropium 250micrograms/1ml nebulisation unit	10	steri-neb ipratropium 250micrograms/1ml nebulisation unit	1140888906	R03BB01	Ipratropium Bromide	FALSE	TRUE
1822	folinic acid product	10	folinic acid product	1140870436	V03AF03	Leucovorin	FALSE	TRUE
1823	celevac 500mg tablet	10	celevac 500mg tablet	1140865774	A06AC06	Methyl Cellulose	FALSE	TRUE
1824	emulsiderm emollient emulsion	10	emulsiderm emollient emulsion	1141151848	D02A	Mineral Oil |Benzalkonium |Isopropyl Myristate	FALSE	TRUE
1825	emulsiderm emollient lotion	10	emulsiderm emollient lotion	1140878260	D02A	Mineral Oil |Benzalkonium |Isopropyl Myristate	TRUE	TRUE
1826	cardene 20mg capsule	10	cardene 20mg capsule	1140861176	C08CA04	Nicardipine	FALSE	TRUE
1827	oxycontin 80mg m/r tablet	10	oxycontin 80mg m/r tablet	1141171054	N02AA05	Oxycodone	FALSE	TRUE
1828	penciclovir	10	penciclovir	1140926522	D06BB06 |J05AB13	Penciclovir	FALSE	TRUE
1829	phenobarbital product	10	phenobarbital product	1141181616	N03AA02	Phenobarbital	FALSE	TRUE
1830	cyclogest 200mg pessary	10	cyclogest 200mg pessary	1141152356	G03DA04	Progesterone	FALSE	TRUE
1831	accupro 5mg tablet	10	accupro 5mg tablet	1140881706	C09AA06	Quinapril	FALSE	TRUE
1832	selsun shampoo	10	selsun shampoo	1140878506	D01AE13	Selenium Sulfide	FALSE	TRUE
1833	gastrocote s/f liquid	10	gastrocote s/f liquid	1140928346	A02AX	Sodium Bicarbonate |Aluminum Hydroxide |Alginic Acid |Magnesium Trisilicate	FALSE	TRUE
1834	humatrope(rbe) 18iu(6mg) inj cartridge(pdr for recon)+dil	10	humatrope(rbe) 18iu(6mg) inj cartridge(pdr for recon)+dil	1140928276	H01AC01	Somatropin Recombinant	FALSE	TRUE
1835	adcortyl 0.1% cream	10	adcortyl 0.1% cream	1140883040	A01AC01	Triamcinolone	FALSE	TRUE
1836	dexamphetamine	10						TRUE
1837	ergocalciferol 7.5mg(300,000units)/1ml injection	10						TRUE
1838	feverfen 100mg/5ml s/f oral suspension	10						TRUE
1839	isopto atropine 1% eye drops	10						TRUE
1840	phenylpropanolamine hydrochloride	10						TRUE
1841	picolax 10mg/sachet oral powder	10						TRUE
1842	picosulphate	10						TRUE
1843	premiums tablet	10						TRUE
1844	ritalin 10mg tablet	10						TRUE
1845	zelapar 1.25mg tablet	10						TRUE
1846	6mp - mercaptopurine	9						TRUE
1847	ampicillin	9						TRUE
1848	calchan mr 10mg m/r tablet	9						TRUE
1849	calcidrink 2.52g/sachet granules	9						TRUE
1850	cefuroxime	9						TRUE
1851	clarityn allergy 2% eye drops	9						TRUE
1852	co-cyprindiol	9						TRUE
1853	co-fluampicil	9						TRUE
1854	contac non drowsy 12 hour relief 120mg m/r capsule	9						TRUE
1855	cystrin 3mg tablet	9						TRUE
1856	cytacon 50micrograms tablet	9						TRUE
1857	desmotabs 200micrograms tablet	9						TRUE
1858	domperamol tablet	9						TRUE
1859	eflornithine	9						TRUE
1860	eprex 4000iu/1ml injection	9						TRUE
1861	ethinyloestradiol	9						TRUE
1862	evra transdermal patch	9						TRUE
1863	feroglobin b12 syrup	9						TRUE
1864	glucagen hypokit 1mg(1iu) injection	9						TRUE
1865	glucobay 50mg tablet	9						TRUE
1866	glycopyrronium	9						TRUE
1867	hay-crom aqueous eye drops	9						TRUE
1868	heparinoid+salicylic acid 0.2%/2% cream	9						TRUE
1869	hydrocortisone+lignocaine	9						TRUE
1870	hydrocortone 10mg tablet	9						TRUE
1871	hydromorphone hydrochloride	9						TRUE
1872	hypostop dextrose gel	9						TRUE
1873	isdn - isosorbide dinitrate	9						TRUE
1874	keflex 500mg capsule	9						TRUE
1875	lasix 20mg tablet	9						TRUE
1876	laxoberal 5mg/5ml liquid	9						TRUE
1877	librium 5mg tablet	9						TRUE
1878	miconazole product	9						TRUE
1879	minims dexamethasone na phosphate 0.1% s-d eye drops	9						TRUE
1880	mst continus 5mg m/r tablet	9						TRUE
1881	nambumetone	9						TRUE
1882	nitroglycerol	9						TRUE
1883	nystatin product	9						TRUE
1884	otrivine-antistin nose drops	9						TRUE
1885	oxymetazoline	9						TRUE
1886	peginterferon alfa-2a	9						TRUE
1887	pentazocine	9						TRUE
1888	periostat 20mg capsule	9						TRUE
1889	potassium bicarbonate+citric acid 1.39g/1.14g soluble tablet	9						TRUE
1890	propaderm ointment	9						TRUE
1891	riluzole	9						TRUE
1892	sebco ointment	9						TRUE
1893	septrin forte 960mg tablet	9						TRUE
1894	slow-trasicor 160mg m/r tablet	9						TRUE
1895	soya oil+mixed lauromacrogols 82.95/15% bath oil	9						TRUE
1896	t3 - liothyronine	9						TRUE
1897	trandolapril+verapamil hydrochloride	9						TRUE
1898	transtec 52.5micrograms/hour transdermal patch	9						TRUE
1899	trasicor 20mg tablet	9						TRUE
1900	tylex effervescent soluble tablet	9						TRUE
1901	udca - ursodeoxycholic acid	9						TRUE
1902	verapress mr 240 m/r tablet	9						TRUE
1903	visclair 100mg tablet	9						TRUE
1904	volmax 4mg m/r tablet	9						TRUE
1905	waterfall tablet	9						TRUE
1906	xanax 250mcg tablet	9						TRUE
1907	zaleplon	9						TRUE
1908	zovirax cold sore 5% cream	9						TRUE
1909	zyloric 100mg tablet	9						TRUE
1910	adapalene	8						TRUE
1911	aldactide 25 tablet	8						TRUE
1912	alpha tocopheryl product	8						TRUE
1913	betamethasone+clotrimazole	8						TRUE
1914	betamethasone+neomycin sulphate	8						TRUE
1915	beta-prograne 160mg m/r capsule	8						TRUE
1916	burinex 1mg tablet	8						TRUE
1917	buserelin	8						TRUE
1918	calcette 500mg chewable tablet	8						TRUE
1919	calciferol 250micrograms tablet	8						TRUE
1920	carbagen sr 200mg m/r tablet	8						TRUE
1921	coal tar 4.3% shampoo	8						TRUE
1922	co-flumactone	8						TRUE
1923	corlan pellet	8						TRUE
1924	cpz - chlorpromazine	8						TRUE
1925	crotamiton	8						TRUE
1926	cytotec 200mcg tablet	8						TRUE
1927	dantrium 25mg capsule	8						TRUE
1928	dermacort cream	8						TRUE
1929	desogestrel product	8						TRUE
1930	diconal tablet	8						TRUE
1931	diflucortolone	8						TRUE
1932	disodium etidronate	8						TRUE
1933	disprin cv 100mg m/r tablet	8						TRUE
1934	dithranol	8						TRUE
1935	dromadol sr 100mg m/r tablet	8						TRUE
1936	duo-autohaler inhaler	8						TRUE
1937	duovent inhaler	8						TRUE
1938	erythromycin+zinc acetate 40mg/12mg/ml topical solution	8						TRUE
1939	estropipate	8						TRUE
1940	fenbid forte 10% gel	8						TRUE
1941	fluocinonide	8						TRUE
1942	fluorouracil 5% cream	8						TRUE
1943	haymine m/r tablet	8						TRUE
1944	hydrocortisone+fusidic acid	8						TRUE
1945	hydrous ointment bp	8						TRUE
1946	hydroxyethylcellulose	8						TRUE
1947	ibrufhalal 200mg tablet	8						TRUE
1948	ibuspray topical spray	8						TRUE
1949	indinavir	8						TRUE
1950	interferon alfa-2a	8						TRUE
1951	klaricid 250mg tablet	8						TRUE
1952	levomepromazine	8						TRUE
1953	liquivisc 0.25% eye gel	8						TRUE
1954	lubrifilm eye ointment	8						TRUE
1955	meprate 400mg tablet	8						TRUE
1956	minocin 100mg tablet	8						TRUE
1957	molipaxin 50mg capsule	8						TRUE
1958	mst continus 15mg m/r tablet	8						TRUE
1959	mydrilate 0.5% eye drops	8						TRUE
1960	nasivin 0.05% nasal spray	8						TRUE
1961	nolvadex 10mg tablet	8						TRUE
1962	nutrizym 10 e/c granules in capsule	8						TRUE
1963	nystan 100,000units/ml oral suspension	8						TRUE
1964	optrex dry eye therapy eye drops	8						TRUE
1965	oral erythromycin	8						TRUE
1966	paludrine 100mg tablet	8						TRUE
1967	periostat 20mg tablet	8						TRUE
1968	perphenazine	8						TRUE
1969	pimecrolimus	8						TRUE
1970	pollenase 50micrograms nasal spray	8						TRUE
1971	povidone	8						TRUE
1972	primaquine	8						TRUE
1973	quinagolide	8						TRUE
1974	ranitil 150mg tablet	8						TRUE
1975	rocaltrol 250nanograms capsule	8						TRUE
1976	staril 10mg tablet	8						TRUE
1977	starlix 60mg tablet	8						TRUE
1978	sustiva 100mg capsule	8						TRUE
1979	t/gel shampoo	8						TRUE
1980	tarka 2mg/180mg m/r capsule	8						TRUE
1981	tavegil 1mg tablet	8						TRUE
1982	tetrabenazine	8						TRUE
1983	tiaprofenic acid	8						TRUE
1984	tramake 50mg capsule	8						TRUE
1985	ultraproct ointment	8						TRUE
1986	valganciclovir	8						TRUE
1987	zanaflex 2mg tablet	8						TRUE
1988	zincomed 220mg capsule	8						TRUE
1989	zithromax 250mg capsule	8						TRUE
1990	acenocoumarol	7						TRUE
1991	adefovir	7						TRUE
1992	advil 200mg tablet	7						TRUE
1993	aldomet 125mg tablet	7						TRUE
1994	amiloride hcl+cyclopenthiazide 2.5mg/250micrograms tablet	7						TRUE
1995	amiloride hydrochloride+bumetanide 5mg/1mg tablet	7						TRUE
1996	arava 20mg tablet	7						TRUE
1997	askit powder	7						TRUE
1998	atenolol+nifedipine 50mg/20mg m/r capsule	7						TRUE
[truncated: 4,747 more rows]

## Sheet: Table S3
Table S3: Metabolon manifest for all metabolites annotated as SUB_PATHWAY Drug - … , together with ATC codes and drugbank identifiers.
BIOCHEMICAL	SUB PATHWAY	COMP ID	PLATFORM	CHEMICAL ID	RI	MASS	PUBCHEM	CAS	KEGG	HMDB	N BIOCHEMICAL detected	related to Drug	drugbank ID	ATC Code	ATC Levels	self-reported in QBB	N self-reported in QBB (based on 6,000 individuals)	Self reported medication	Metabolite detected in blood	Metabolon SUB_PATHWAY	N self	% reported	N blood	% detected	P-value (Fisher)	Strongest Both	Strongest Self	Strongest Blood	Strongest One	Self only	Blood only	Both	Neither	Total	Self only/either	Blood only/either	Both/either	Both/Self reported (self-reported and detected)	Both/detected
4-hydroxycoumarin	Drug - Cardiovascular	37445	LC/MS Neg	100002049	2470	161.024	54682930	1076-38-6	C20414		1741	4-hydroxycoumarin	DB03410	N/A	N/A	no	0	#N/A	#N/A	#N/A	#N/A	#N/A	#N/A	#N/A	#N/A	#N/A	#N/A	#N/A	#N/A	#N/A	#N/A	#N/A	#N/A	#N/A	#N/A	#N/A	#N/A	#N/A	#N/A
2-methoxyacetaminophen glucuronide*	Drug - Analgesics, Anesthetics	33161	LC/MS Neg	100001795	1633	356.099	14367271				419	acetaminophen	DB00316	N02AJ01	N02BE,N02B,N02,N,N02BE,N02B,N02,N,N02AJ,N02A,N02,N,N02AJ,N02A,N02,N,N02BE,N02B,N02,N,N02AJ,N02A,N02,N,N02AJ,N02A,N02,N	acetaminophen	28	acetaminophen	2-methoxyacetaminophen glucuronide*	Drug - Analgesics, Anesthetics	17	0.00605629	419	0.14927	2.07504e-08	x	x	x	x	4	406	13	2384	2807	0.00945626	0.959811	0.0307329	0.764706	0.0310263
2-hydroxyacetaminophen sulfate*	Drug - Analgesics, Anesthetics	33173	LC/MS Neg	100001791	1674	246.008	86290013				575	acetaminophen	DB00316	N02AJ01	N02BE,N02B,N02,N,N02BE,N02B,N02,N,N02AJ,N02A,N02,N,N02AJ,N02A,N02,N,N02BE,N02B,N02,N,N02AJ,N02A,N02,N,N02AJ,N02A,N02,N	acetaminophen	28	acetaminophen	2-hydroxyacetaminophen sulfate*	Drug - Analgesics, Anesthetics	17	0.00605629	575	0.204845	7.36248e-08	.	.	x	x	3	561	14	2229	2807	0.00519031	0.970588	0.0242215	0.823529	0.0243478
4-acetamidophenol	Drug - Analgesics, Anesthetics	12032	LC/MS Neg	1383	2173.7	150.056	1983	103-90-2	C06804	HMDB01859	708	acetaminophen	DB00316	N02AJ01	N02BE,N02B,N02,N,N02BE,N02B,N02,N,N02AJ,N02A,N02,N,N02AJ,N02A,N02,N,N02BE,N02B,N02,N,N02AJ,N02A,N02,N,N02AJ,N02A,N02,N	acetaminophen	28	acetaminophen	4-acetamidophenol	Drug - Analgesics, Anesthetics	17	0.00605629	708	0.252227	7.61852e-08	.	.	x	x	2	693	15	2097	2807	0.0028169	0.976056	0.0211268	0.882353	0.0211864
3-(methylthio)acetaminophen sulfate*	Drug - Analgesics, Anesthetics	62567	LC/MS Neg	100020827	2265	276.001					621	acetaminophen	DB00316	N02AJ01	N02BE,N02B,N02,N,N02BE,N02B,N02,N,N02AJ,N02A,N02,N,N02AJ,N02A,N02,N,N02BE,N02B,N02,N,N02AJ,N02A,N02,N,N02AJ,N02A,N02,N	acetaminophen	28	acetaminophen	3-(methylthio)acetaminophen sulfate*	Drug - Analgesics, Anesthetics	17	0.00605629	621	0.221233	2.06681e-07	.	.	x	x	3	607	14	2183	2807	0.00480769	0.972756	0.0224359	0.823529	0.0225443
2-methoxyacetaminophen sulfate*	Drug - Analgesics, Anesthetics	47031	LC/MS Neg	100001793	1949	260.023	86290014				411	acetaminophen	DB00316	N02AJ01	N02BE,N02B,N02,N,N02BE,N02B,N02,N,N02AJ,N02A,N02,N,N02AJ,N02A,N02,N,N02BE,N02B,N02,N,N02AJ,N02A,N02,N,N02AJ,N02A,N02,N	acetaminophen	28	acetaminophen	2-methoxyacetaminophen sulfate*	Drug - Analgesics, Anesthetics	17	0.00605629	411	0.14642	2.583e-07	.	.	x	x	5	399	12	2391	2807	0.0120192	0.959135	0.0288462	0.705882	0.0291971
4-acetamidophenylglucuronide	Drug - Analgesics, Anesthetics	15736	LC/MS Neg	100000043	1400	326.088	83944	120595-80-4		HMDB10316	938	acetaminophen	DB00316	N02AJ01	N02BE,N02B,N02,N,N02BE,N02B,N02,N,N02AJ,N02A,N02,N,N02AJ,N02A,N02,N,N02BE,N02B,N02,N,N02AJ,N02A,N02,N,N02AJ,N02A,N02,N	acetaminophen	28	acetaminophen	4-acetamidophenylglucuronide	Drug - Analgesics, Anesthetics	17	0.00605629	938	0.334165	2.59908e-07	.	.	x	x	1	922	16	1868	2807	0.00106496	0.981896	0.0170394	0.941176	0.0170576
3-(N-acetyl-L-cystein-S-yl) acetaminophen	Drug - Analgesics, Anesthetics	45721	LC/MS Neg	2048	2094	311.071	83967	52372-86-8			370	acetaminophen	DB00316	N02AJ01	N02BE,N02B,N02,N,N02BE,N02B,N02,N,N02AJ,N02A,N02,N,N02AJ,N02A,N02,N,N02BE,N02B,N02,N,N02AJ,N02A,N02,N,N02AJ,N02A,N02,N	acetaminophen	28	acetaminophen	3-(N-acetyl-L-cystein-S-yl) acetaminophen	Drug - Analgesics, Anesthetics	17	0.00605629	370	0.131813	1.07085e-06	.	.	x	x	6	359	11	2431	2807	0.0159574	0.954787	0.0292553	0.647059	0.0297297
4-acetaminophen sulfate	Drug - Analgesics, Anesthetics	37475	LC/MS Neg	2049	1792	230.013	83939	10066-90-7;32113-41-0	C06804	HMDB59911	1102	acetaminophen	DB00316	N02AJ01	N02BE,N02B,N02,N,N02BE,N02B,N02,N,N02AJ,N02A,N02,N,N02AJ,N02A,N02,N,N02BE,N02B,N02,N,N02AJ,N02A,N02,N,N02AJ,N02A,N02,N	acetaminophen	28	acetaminophen	4-acetaminophen sulfate	Drug - Analgesics, Anesthetics	17	0.00605629	1102	0.39259	3.20997e-06	.	.	x	x	1	1086	16	1704	2807	0.000906618	0.984587	0.0145059	0.941176	0.0145191
3-(cystein-S-yl)acetaminophen*	Drug - Analgesics, Anesthetics	34365	LC/MS Pos Early	100001797	2420	271.075	5233914				414	acetaminophen	DB00316	N02AJ01	N02BE,N02B,N02,N,N02BE,N02B,N02,N,N02AJ,N02A,N02,N,N02AJ,N02A,N02,N,N02BE,N02B,N02,N,N02AJ,N02A,N02,N,N02AJ,N02A,N02,N	acetaminophen	28	acetaminophen	3-(cystein-S-yl)acetaminophen*	Drug - Analgesics, Anesthetics	17	0.00605629	414	0.147488	3.39437e-06	.	.	x	x	6	403	11	2387	2807	0.0142857	0.959524	0.0261905	0.647059	0.02657
salicyluric glucuronide*	Drug - Analgesics, Anesthetics	33384	LC/MS Neg	100001332	1463	370.078					1292	acetylsalicylic acid	DB00945	C07FX02	B01AC,B01A,B01,B,C07FX,C07F,C07,C,C10BX,C10B,C10,C,M01BA,M01B,M01,M,N02BA,N02B,N02,N,C10BX,C10B,C10,C,B01AC,B01A,B01,B,N02AJ,N02A,N02,N,N02AJ,N02A,N02,N,N02BA,N02B,N02,N,C10BX,C10B,C10,C,N02BA,N02B,N02,N,A01AD,A01A,A01,A,C10BX,C10B,C10,C,C07FX,C07F,C07,C,N02AJ,N02A,N02,N,C10BX,C10B,C10,C,C10BX,C10B,C10,C,C10BX,C10B,C10,C,C07FX,C07F,C07,C	acetylsalicylic acid	309	acetylsalicylic acid	salicyluric glucuronide*	Drug - Analgesics, Anesthetics	111	0.039544	1292	0.460278	2.45004e-21	x	x	x	x	13	1194	98	1502	2807	0.00996169	0.914943	0.0750958	0.882883	0.0758514
2,6-dihydroxybenzoic acid	Drug - Topical Agents	63042	LC/MS Neg	100020837	2575	153.019	9338	303-07-1		HMDB13676	2806	acetylsalicylic acid	DB00945	C07FX02	B01AC,B01A,B01,B,C07FX,C07F,C07,C,C10BX,C10B,C10,C,M01BA,M01B,M01,M,N02BA,N02B,N02,N,C10BX,C10B,C10,C,B01AC,B01A,B01,B,N02AJ,N02A,N02,N,N02AJ,N02A,N02,N,N02BA,N02B,N02,N,C10BX,C10B,C10,C,N02BA,N02B,N02,N,A01AD,A01A,A01,A,C10BX,C10B,C10,C,C07FX,C07F,C07,C,N02AJ,N02A,N02,N,C10BX,C10B,C10,C,C10BX,C10B,C10,C,C10BX,C10B,C10,C,C07FX,C07F,C07,C	acetylsalicylic acid	309	#N/A	#N/A	#N/A	#N/A	#N/A	#N/A	#N/A	#N/A	#N/A	#N/A	#N/A	#N/A	#N/A	#N/A	#N/A	#N/A	#N/A	#N/A	#N/A	#N/A	#N/A	#N/A
salicylate	Drug - Topical Agents	1515	LC/MS Polar	501	802	137.024	338	69-72-7	C00805	HMDB01895	2798	acetylsalicylic acid	DB00945	C07FX02	B01AC,B01A,B01,B,C07FX,C07F,C07,C,C10BX,C10B,C10,C,M01BA,M01B,M01,M,N02BA,N02B,N02,N,C10BX,C10B,C10,C,B01AC,B01A,B01,B,N02AJ,N02A,N02,N,N02AJ,N02A,N02,N,N02BA,N02B,N02,N,C10BX,C10B,C10,C,N02BA,N02B,N02,N,A01AD,A01A,A01,A,C10BX,C10B,C10,C,C07FX,C07F,C07,C,N02AJ,N02A,N02,N,C10BX,C10B,C10,C,C10BX,C10B,C10,C,C10BX,C10B,C10,C,C07FX,C07F,C07,C	acetylsalicylic acid	309	#N/A	#N/A	#N/A	#N/A	#N/A	#N/A	#N/A	#N/A	#N/A	#N/A	#N/A	#N/A	#N/A	#N/A	#N/A	#N/A	#N/A	#N/A	#N/A	#N/A	#N/A	#N/A
amoxicillin	Drug - Antibiotic	52948	LC/MS Neg	100008962	2365	364.097	2171	26787-78-0	C06827	HMDB15193	37	amoxicillin	DB01060	J01CA04	A02BD,A02B,A02,A,J01CR,J01C,J01,J,A02BD,A02B,A02,A,A02BD,A02B,A02,A,A02BD,A02B,A02,A,A02BD,A02B,A02,A,A02BD,A02B,A02,A,A02BD,A02B,A02,A,A02BD,A02B,A02,A,J01CA,J01C,J01,J	amoxicillin	4	amoxicillin	amoxicillin	Drug - Antibiotic	2	0.000712504	37	0.0131813	0.0261935	.	x	.	x	1	36	1	2769	2807	0.0263158	0.947368	0.0263158	0.5	0.027027
atenolol	Drug - Cardiovascular	38658	LC/MS Pos Early	100002726	2668	267.17	2249	29122-68-7	D00235	HMDB01924	140	atenolol	DB00335	C07CB03	C07CB,C07C,C07,C,C07AB,C07A,C07,C,C07FB,C07F,C07,C,C07DB,C07D,C07,C,C07BB,C07B,C07,C,C07CB,C07C,C07,C	atenolol	44	atenolol	atenolol	Drug - Cardiovascular	18	0.00641254	140	0.0498753	4.81316e-22	x	x	x	x	1	123	17	2666	2807	0.0070922	0.87234	0.120567	0.944444	0.121429
o-hydroxyatorvastatin	Drug - Metabolic	47883	LC/MS Neg	100005933	5015	573.241	9808225	214217-86-4			110	atorvastatin	DB01076	C10BX12	C10BX,C10B,C10,C,C10AA,C10A,C10,C,C10BX,C10B,C10,C,C10BA,C10B,C10,C,C10BX,C10B,C10,C,C10BX,C10B,C10,C,C10BX,C10B,C10,C,C10BX,C10B,C10,C	atorvastatin	234	atorvastatin	o-hydroxyatorvastatin	Drug - Metabolic	90	0.0320627	110	0.0391877	3.096e-76	x	x	x	x	27	47	63	2670	2807	0.19708	0.343066	0.459854	0.7	0.572727
atorvastatin (lipitor)	Drug - Metabolic	38619	LC/MS Neg	100002802	5101	557.246	60823	134523-03-8	D00887	HMDB05006	45	atorvastatin	DB01076	C10BX12	C10BX,C10B,C10,C,C10AA,C10A,C10,C,C10BX,C10B,C10,C,C10BA,C10B,C10,C,C10BX,C10B,C10,C,C10BX,C10B,C10,C,C10BX,C10B,C10,C,C10BX,C10B,C10,C	atorvastatin	234	atorvastatin	atorvastatin (lipitor)	Drug - Metabolic	90	0.0320627	45	0.0160314	2.50717e-27	.	.	x	x	65	20	25	2697	2807	0.590909	0.181818	0.227273	0.277778	0.555556
hydroxybupropion	Drug - Psychoactive	32882	LC/MS Pos Late	100001309	750	256.11	446			HMDB12235	1	bupropion	DB01156	N06AX12	A08AA,A08A,A08,A,N06AX,N06A,N06,N	no	0	#N/A	#N/A	#N/A	#N/A	#N/A	#N/A	#N/A	#N/A	#N/A	#N/A	#N/A	#N/A	#N/A	#N/A	#N/A	#N/A	#N/A	#N/A	#N/A	#N/A	#N/A	#N/A
canagliflozin	Drug - Metabolic	64106	LC/MS Neg	100020890	5270	443.133		842133-18-0			0	canagliflozin	DB08907	A10BK02	A10BD,A10B,A10,A,A10BK,A10B,A10,A	canagliflozin	1	#N/A	#N/A	#N/A	#N/A	#N/A	#N/A	#N/A	#N/A	#N/A	#N/A	#N/A	#N/A	#N/A	#N/A	#N/A	#N/A	#N/A	#N/A	#N/A	#N/A	#N/A	#N/A
carbamazepine 10,11-epoxide*	Drug - Neurological	37020	LC/MS Pos Early	100002321	3125	253.097	2555	36507-30-9	C07496	HMDB60658	1	carbamazepine	DB00564	N03AF01	N03AF,N03A,N03,N	carbamazepine	5	carbamazepine	carbamazepine 10,11-epoxide*	Drug - Neurological	1	0.000356252	1	0.000356252	0.000356252	x	x	x	x	0	0	1	2806	2807	0	0	1	1	1
carbamazepine glucuronide*	Drug - Neurological	37056	LC/MS Neg	100002322	3884	411.12					3	carbamazepine	DB00564	N03AF01	N03AF,N03A,N03,N	carbamazepine	5	carbamazepine	carbamazepine glucuronide*	Drug - Neurological	1	0.000356252	3	0.00106876	0.00106876	.	.	x	x	0	2	1	2804	2807	0	0.666667	0.333333	1	0.333333
carbamazepine	Drug - Neurological	37033	LC/MS Pos Late	100001933	880	237.102	2554	298-46-4	D00252	HMDB14704	16	carbamazepine	DB00564	N03AF01	N03AF,N03A,N03,N	carbamazepine	5	carbamazepine	carbamazepine	Drug - Neurological	1	0.000356252	16	0.00570004	0.00570004	.	.	x	x	0	15	1	2791	2807	0	0.9375	0.0625	1	0.0625
celecoxib	Drug - Analgesics, Anesthetics	38599	LC/MS Neg	100002805	5283	380.069	2662	169590-42-5	C07589	HMDB05014	58	celecoxib	DB00482	G01AE10	M01AH,M01A,M01,M,L01XX,L01X,L01,L,G01AE,G01A,G01,G	celecoxib	33	celecoxib	celecoxib	Drug - Analgesics, Anesthetics	18	0.00641254	58	0.0206626	1.52454e-11	x	x	x	x	9	49	9	2740	2807	0.134328	0.731343	0.134328	0.5	0.155172
cetirizine	Drug - Respiratory	54745	LC/MS Pos Late	100009034	1052	389.163	2678	83881-51-0	C07778	HMDB05032	102	cetirizine	DB00341	R06AE07	R06AE,R06A,R06,R	cetirizine	14	cetirizine	cetirizine	Drug - Respiratory	7	0.00249377	102	0.0363377	1.14004e-06	x	x	x	x	2	97	5	2703	2807	0.0192308	0.932692	0.0480769	0.714286	0.0490196
chlorthalidone	Drug - Cardiovascular	54784	LC/MS Neg	100006181	3600	337.006	2732	77-36-1	D00272		5	chlorthalidone	DB00310	C03BA04	G01AE,G01A,G01,G,C03EA,C03E,C03,C,C03BB,C03B,C03,C,C03BA,C03B,C03,C	no	0	#N/A	#N/A	#N/A	#N/A	#N/A	#N/A	#N/A	#N/A	#N/A	#N/A	#N/A	#N/A	#N/A	#N/A	#N/A	#N/A	#N/A	#N/A	#N/A	#N/A	#N/A	#N/A
ciprofloxacin	Drug - Antibiotic	57614	LC/MS Neg	100000687	2724	392.126	4011971;2764	85721-33-1	C05349		10	ciprofloxacin	DB00537	S01AE03	J01RA,J01R,J01,J,S03AA,S03A,S03,S,J01MA,J01M,J01,J,S02AA,S02A,S02,S,J01RA,J01R,J01,J,J01RA,J01R,J01,J,S01AE,S01A,S01,S	ciprofloxacin	1	#N/A	#N/A	#N/A	#N/A	#N/A	#N/A	#N/A	#N/A	#N/A	#N/A	#N/A	#N/A	#N/A	#N/A	#N/A	#N/A	#N/A	#N/A	#N/A	#N/A	#N/A	#N/A
sulfociprofloxacin*	Drug - Antibiotic	62474	LC/MS Neg	100020787	2340	410.083	128781				5	ciprofloxacin	DB00537	S01AE03	J01RA,J01R,J01,J,S03AA,S03A,S03,S,J01MA,J01M,J01,J,S02AA,S02A,S02,S,J01RA,J01R,J01,J,J01RA,J01R,J01,J,S01AE,S01A,S01,S	ciprofloxacin	1	#N/A	#N/A	#N/A	#N/A	#N/A	#N/A	#N/A	#N/A	#N/A	#N/A	#N/A	#N/A	#N/A	#N/A	#N/A	#N/A	#N/A	#N/A	#N/A	#N/A	#N/A	#N/A
citalopram propionate*	Drug - Psychoactive	62479	LC/MS Neg	100020793	4400	310.088	10403174		C16610	HMDB60463	34	citalopram	DB00215	N06AB04	N06AB,N06A,N06,N	citalopram	2	#N/A	#N/A	#N/A	#N/A	#N/A	#N/A	#N/A	#N/A	#N/A	#N/A	#N/A	#N/A	#N/A	#N/A	#N/A	#N/A	#N/A	#N/A	#N/A	#N/A	#N/A	#N/A
citalopram/escitalopram	Drug - Psychoactive	40459	LC/MS Pos Late	100003444	908	325.171	146570	219861-08-2	D07913	HMDB05028	31	citalopram	DB00215	N06AB04	N06AB,N06A,N06,N	citalopram	2	#N/A	#N/A	#N/A	#N/A	#N/A	#N/A	#N/A	#N/A	#N/A	#N/A	#N/A	#N/A	#N/A	#N/A	#N/A	#N/A	#N/A	#N/A	#N/A	#N/A	#N/A	#N/A
desmethylcitalopram*	Drug - Psychoactive	62477	LC/MS Pos Late	100020790	880	311.155	162180		C16608	HMDB14021,HMDB60576	21	citalopram	DB00215	N06AB04	N06AB,N06A,N06,N	citalopram	2	#N/A	#N/A	#N/A	#N/A	#N/A	#N/A	#N/A	#N/A	#N/A	#N/A	#N/A	#N/A	#N/A	#N/A	#N/A	#N/A	#N/A	#N/A	#N/A	#N/A	#N/A	#N/A
clarithromycin	Drug - Antibiotic	64117	LC/MS Pos Late	100020873	1078	748.484		81103-11-9	D00276,C06912	HMDB15342	14	clarithromycin	DB01211	J01FA09	A02BD,A02B,A02,A,A02BD,A02B,A02,A,A02BD,A02B,A02,A,A02BD,A02B,A02,A,A02BD,A02B,A02,A,A02BD,A02B,A02,A,J01FA,J01F,J01,J	clarithromycin	1	#N/A	#N/A	#N/A	#N/A	#N/A	#N/A	#N/A	#N/A	#N/A	#N/A	#N/A	#N/A	#N/A	#N/A	#N/A	#N/A	#N/A	#N/A	#N/A	#N/A	#N/A	#N/A
dexlansoprazole	Drug - Gastrointestinal	57668	LC/MS Pos Late	100015794	827	370.083	9578005	138530-94-6	D08903		28	dexlansoprazole	DB05351	A02BC06	A02BC,A02B,A02,A	no	0	#N/A	#N/A	#N/A	#N/A	#N/A	#N/A	#N/A	#N/A	#N/A	#N/A	#N/A	#N/A	#N/A	#N/A	#N/A	#N/A	#N/A	#N/A	#N/A	#N/A	#N/A	#N/A
diclofenac	Drug - Analgesics, Anesthetics	52931	LC/MS Neg	100008961	4903	294.009		15307-86-5	C01690	HMDB14724	79	diclofenac	DB00586	D11AX18	S01CC,S01C,S01,S,S01BC,S01B,S01,S,M01AB,M01A,M01,M,M02AA,M02A,M02,M,M01AB,M01A,M01,M,D11AX,D11A,D11,D	diclofenac	18	#N/A	#N/A	#N/A	#N/A	#N/A	#N/A	#N/A	#N/A	#N/A	#N/A	#N/A	#N/A	#N/A	#N/A	#N/A	#N/A	#N/A	#N/A	#N/A	#N/A	#N/A	#N/A
diphenhydramine	Drug - Respiratory	38669	LC/MS Pos Late	100002732	911	256.17	3100	147-24-0	C06960	HMDB01927	57	diphenhydramine	DB01075	R06AA52	D04AA,D04A,D04,D,R06AA,R06A,R06,R,D04AA,D04A,D04,D,R06AA,R06A,R06,R	no	0	#N/A	#N/A	#N/A	#N/A	#N/A	#N/A	#N/A	#N/A	#N/A	#N/A	#N/A	#N/A	#N/A	#N/A	#N/A	#N/A	#N/A	#N/A	#N/A	#N/A	#N/A	#N/A
doxycycline	Drug - Antibiotic	39273	LC/MS Pos Late	100003009	829	445.161		24390-14-5			13	doxycycline	DB00254	J01AA20	J01AA,J01A,J01,J,A01AB,A01A,A01,A,J01AA,J01A,J01,J	doxycycline	3	doxycycline	doxycycline	Drug - Antibiotic	1	0.000356252	13	0.00463128	0.00463128	x	x	x	x	0	12	1	2794	2807	0	0.923077	0.0769231	1	0.0769231
duloxetine	Drug - Psychoactive	40450	LC/MS Pos Late	100003445	993	298.126	60835	116539-59-4			5	duloxetine	DB00476	N06AX21	N06AX,N06A,N06,N	duloxetine	3	#N/A	#N/A	#N/A	#N/A	#N/A	#N/A	#N/A	#N/A	#N/A	#N/A	#N/A	#N/A	#N/A	#N/A	#N/A	#N/A	#N/A	#N/A	#N/A	#N/A	#N/A	#N/A
4-hydroxy duloxetine glucuronide*	Drug - Psychoactive	62480	LC/MS Neg	100020796	3705	488.138				HMDB60763	4	duloxetine	DB00476	N06AX21	N06AX,N06A,N06,N	duloxetine	3	#N/A	#N/A	#N/A	#N/A	#N/A	#N/A	#N/A	#N/A	#N/A	#N/A	#N/A	#N/A	#N/A	#N/A	#N/A	#N/A	#N/A	#N/A	#N/A	#N/A	#N/A	#N/A
5-hydroxy-6-methoxy duloxetine sulfate*	Drug - Psychoactive	62481	LC/MS Neg	100020798	3807	422.074					4	duloxetine	DB00476	N06AX21	N06AX,N06A,N06,N	duloxetine	3	#N/A	#N/A	#N/A	#N/A	#N/A	#N/A	#N/A	#N/A	#N/A	#N/A	#N/A	#N/A	#N/A	#N/A	#N/A	#N/A	#N/A	#N/A	#N/A	#N/A	#N/A	#N/A
Empagliflozin	Drug - Metabolic	64329	LC/MS Neg	100021946	4970	449.137		864070-44-0			0	empagliflozin	DB09038	A10BK03	A10BD,A10B,A10,A,A10BD,A10B,A10,A,A10BK,A10B,A10,A	no	0	#N/A	#N/A	#N/A	#N/A	#N/A	#N/A	#N/A	#N/A	#N/A	#N/A	#N/A	#N/A	#N/A	#N/A	#N/A	#N/A	#N/A	#N/A	#N/A	#N/A	#N/A	#N/A
enalapril	Drug - Cardiovascular	52949	LC/MS Pos Late	100008948	900	377.207	3222	75847-73-3			13	enalapril	DB00584	C09AA02	C09BA,C09B,C09,C,C09BB,C09B,C09,C,C09BB,C09B,C09,C,C09AA,C09A,C09,C	enalapril	20	enalapril	enalapril	Drug - Cardiovascular	8	0.00285002	13	0.00463128	4.29166e-06	x	x	x	x	5	10	3	2789	2807	0.277778	0.555556	0.166667	0.375	0.230769
ezetimibe glucuronide*	Drug - Metabolic	62483	LC/MS Neg	100020801	4588	584.174	9894653				9	ezetimibe	DB00973	C10BA06	C10BA,C10B,C10,C,C10BA,C10B,C10,C,C10AX,C10A,C10,C,C10BA,C10B,C10,C	ezetimibe	7	ezetimibe	ezetimibe glucuronide*	Drug - Metabolic	1	0.000356252	9	0.00320627	0.00320627	.	x	.	x	0	8	1	2798	2807	0	0.888889	0.111111	1	0.111111
fexofenadine	Drug - Respiratory	42021	LC/MS Pos Late	100004018	944	502.295	3348	83799-24-0	C06999	HMDB05030	57	fexofenadine	DB00950	R06AX26	R06AX,R06A,R06,R	fexofenadine	22	fexofenadine	fexofenadine	Drug - Respiratory	12	0.00427503	57	0.0203064	7.15726e-10	x	x	x	x	5	50	7	2745	2807	0.0806452	0.806452	0.112903	0.583333	0.122807
fluconazole	Drug - Antibiotic	57707	LC/MS Neg	100015972	3564	305.097	3365	86386-73-4	D00322	HMDB14342	35	fluconazole	DB00196	D01AC15	J01RA,J01R,J01,J,J02AC,J02A,J02,J,D01AC,D01A,D01,D	no	0	#N/A	#N/A	#N/A	#N/A	#N/A	#N/A	#N/A	#N/A	#N/A	#N/A	#N/A	#N/A	#N/A	#N/A	#N/A	#N/A	#N/A	#N/A	#N/A	#N/A	#N/A	#N/A
fluoxetine	Drug - Psychoactive	44619	LC/MS Pos Late	1382	1025	310.141	3386	59333-67-4	D00326		14	fluoxetine	DB00472	N06AB03	N06CA,N06C,N06,N,N06AB,N06A,N06,N	fluoxetine	6	fluoxetine	fluoxetine	Drug - Psychoactive	3	0.00106876	14	0.00498753	6.91229e-05	x	x	x	x	1	12	2	2792	2807	0.0666667	0.8	0.133333	0.666667	0.142857
furosemide	Drug - Cardiovascular	43009	LC/MS Neg	100004241	3515	329	3440	54-31-9	D00331	HMDB01933	43	furosemide	DB00695	G01AE10	C03EB,C03E,C03,C,C03CA,C03C,C03,C,C03CB,C03C,C03,C,G01AE,G01A,G01,G	furosemide	7	furosemide	furosemide	Drug - Cardiovascular	2	0.000712504	43	0.0153188	0.0304084	.	.	.	.	1	42	1	2763	2807	0.0227273	0.954545	0.0227273	0.5	0.0232558
gabapentin	Drug - Neurological	38686	LC/MS Neg	100002806	2407.4	170.119	3446	60142-96-3	D00332	HMDB05015	22	gabapentin	DB00996	N03AX12	N03AX,N03A,N03,N	gabapentin	7	gabapentin	gabapentin	Drug - Neurological	1	0.000356252	22	0.00783755	0.00783755	.	x	.	x	0	21	1	2785	2807	0	0.954545	0.0454545	1	0.0454545
Gliclazide	Drug - Metabolic	64330	LC/MS Pos Late	100021947	1063	324.138		21187-98-4			468	gliclazide	DB01120	A10BB09	A10BB,A10B,A10,A	gliclazide	121	gliclazide	Gliclazide	Drug - Metabolic	47	0.0167439	468	0.166726	6.17073e-30	x	x	x	x	4	425	43	2335	2807	0.00847458	0.900424	0.0911017	0.914894	0.0918803
Glimepiride	Drug - Metabolic	64110	LC/MS Neg	100020885	5063	489.218		93479-97-1			25	glimepiride	DB00222	A10BD06	A10BD,A10B,A10,A,A10BB,A10B,A10,A,A10BD,A10B,A10,A	glimepiride	54	glimepiride	Glimepiride	Drug - Metabolic	18	0.00641254	25	0.00890631	1.67014e-17	x	x	x	x	8	15	10	2774	2807	0.242424	0.454545	0.30303	0.555556	0.4
glyburide	Drug - Metabolic	63916	LC/MS Neg	100020883	5012	492.137	3488	10238-21-8	D00336,C07022	HMDB15151	4	glyburide	DB01016	A10BB01	A10BB,A10B,A10,A	glyburide	4	glyburide	glyburide	Drug - Metabolic	1	0.000356252	4	0.00142501	0.00142501	.	x	.	x	0	3	1	2803	2807	0	0.75	0.25	1	0.25
hydrochlorothiazide	Drug - Cardiovascular	39625	LC/MS Neg	100002734	2046	295.957	3639	58-93-5	C07041	HMDB01928	53	hydrochlorothiazide	DB00999	C09XA54	C09BX,C09B,C09,C,C03AX,C03A,C03,C,C03AB,C03A,C03,C,C09DX,C09D,C09,C,C03EA,C03E,C03,C,C09DX,C09D,C09,C,C09XA,C09X,C09,C,G01AE,G01A,G01,G,C09DX,C09D,C09,C,C03AA,C03A,C03,C,C09XA,C09X,C09,C	hydrochlorothiazide	21	hydrochlorothiazide	hydrochlorothiazide	Drug - Cardiovascular	8	0.00285002	53	0.0188814	1.06367e-07	.	x	.	x	3	48	5	2751	2807	0.0535714	0.857143	0.0892857	0.625	0.0943396
hydroquinone sulfate	Drug - Topical Agents	35322	LC/MS Neg	100001604	1395	188.986	161220	123-31-9	C00530	HMDB02434	2119	hydroquinone	DB09526	D11AX11	D11AX,D11A,D11,D	no	0	#N/A	#N/A	#N/A	#N/A	#N/A	#N/A	#N/A	#N/A	#N/A	#N/A	#N/A	#N/A	#N/A	#N/A	#N/A	#N/A	#N/A	#N/A	#N/A	#N/A	#N/A	#N/A
2-hydroxyibuprofen	Drug - Analgesics, Anesthetics	43330	LC/MS Neg	100004169	3462	221.118	10443535	51146-55-5		HMDB60920	114	ibuprofen	DB01050	M01AE51	G02CC,G02C,G02,G,C01EB,C01E,C01,C,M01AE,M01A,M01,M,M02AA,M02A,M02,M,R02AX,R02A,R02,R,N02AJ,N02A,N02,N,N02AJ,N02A,N02,N,M01AE,M01A,M01,M	ibuprofen	5	ibuprofen	2-hydroxyibuprofen	Drug - Analgesics, Anesthetics	2	0.000712504	114	0.0406128	0.00163551	x	x	x	x	0	112	2	2693	2807	0	0.982456	0.0175439	1	0.0175439
ibuprofen	Drug - Analgesics, Anesthetics	17799	LC/MS Neg	1487	4925	205.123	3672	15687-27-1	D00126	HMDB01925	793	ibuprofen	DB01050	M01AE51	G02CC,G02C,G02,G,C01EB,C01E,C01,C,M01AE,M01A,M01,M,M02AA,M02A,M02,M,R02AX,R02A,R02,R,N02AJ,N02A,N02,N,N02AJ,N02A,N02,N,M01AE,M01A,M01,M	ibuprofen	5	#N/A	#N/A	#N/A	#N/A	#N/A	#N/A	#N/A	#N/A	#N/A	#N/A	#N/A	#N/A	#N/A	#N/A	#N/A	#N/A	#N/A	#N/A	#N/A	#N/A	#N/A	#N/A
carboxyibuprofen	Drug - Analgesics, Anesthetics	43333	LC/MS Pos Late	100004171	810	254.139	10444113	15935-54-3		HMDB60564	102	ibuprofen	DB01050	M01AE51	G02CC,G02C,G02,G,C01EB,C01E,C01,C,M01AE,M01A,M01,M,M02AA,M02A,M02,M,R02AX,R02A,R02,R,N02AJ,N02A,N02,N,N02AJ,N02A,N02,N,M01AE,M01A,M01,M	ibuprofen	5	#N/A	#N/A	#N/A	#N/A	#N/A	#N/A	#N/A	#N/A	#N/A	#N/A	#N/A	#N/A	#N/A	#N/A	#N/A	#N/A	#N/A	#N/A	#N/A	#N/A	#N/A	#N/A
imipramine	Drug - Psychoactive	40446	LC/MS Pos Late	100003437	997	281.201	3696	113-52-0	C07049	HMDB01848	1	imipramine	DB00458	N06AA02	N06AA,N06A,N06,N	imipramine	1	#N/A	#N/A	#N/A	#N/A	#N/A	#N/A	#N/A	#N/A	#N/A	#N/A	#N/A	#N/A	#N/A	#N/A	#N/A	#N/A	#N/A	#N/A	#N/A	#N/A	#N/A	#N/A
indapamide	Drug - Cardiovascular	64209	LC/MS Neg	100021796	4391	364.053		26807-65-8			34	indapamide	DB00808	C10BX13	C03BA,C03B,C03,C,C09BX,C09B,C09,C,G01AE,G01A,G01,G,C10BX,C10B,C10,C	indapamide	32	indapamide	indapamide	Drug - Cardiovascular	15	0.00534378	34	0.0121126	9.15926e-25	x	x	x	x	2	21	13	2771	2807	0.0555556	0.583333	0.361111	0.866667	0.382353
levetiracetam	Drug - Neurological	57641	LC/MS Neg	100015873	2540	169.098	5284583	102767-28-2	D00709,C07841		126	levetiracetam	DB01202	N03AX14	N03AX,N03A,N03,N	levetiracetam	10	levetiracetam	levetiracetam	Drug - Neurological	4	0.00142501	126	0.0448878	3.87763e-06	x	x	x	x	0	122	4	2681	2807	0	0.968254	0.031746	1	0.031746
lidocaine	Drug - Analgesics, Anesthetics	35661	LC/MS Pos Early	100001538	3250	235.18	3676	137-58-6	D00358	HMDB14426	164	lidocaine	DB00281	N01BB02	S01HA,S01H,S01,S,D04AB,D04A,D04,D,R02AD,R02A,R02,R,C01BB,C01B,C01,C,S02DA,S02D,S02,S,N01BB,N01B,N01,N,C05AD,C05A,C05,C,N01BB,N01B,N01,N	no	0	#N/A	#N/A	#N/A	#N/A	#N/A	#N/A	#N/A	#N/A	#N/A	#N/A	#N/A	#N/A	#N/A	#N/A	#N/A	#N/A	#N/A	#N/A	#N/A	#N/A	#N/A	#N/A
losartan	Drug - Cardiovascular	64102	LC/MS Neg	100020909	4729	421.155		114798-26-4			27	losartan	DB00678	C09DB06	C09CA,C09C,C09,C,C09DA,C09D,C09,C,C09DB,C09D,C09,C	losartan	42	losartan	losartan	Drug - Cardiovascular	24	0.00855005	27	0.00961881	3.66328e-38	x	x	x	x	5	8	19	2775	2807	0.15625	0.25	0.59375	0.791667	0.703704
meloxicam	Drug - Analgesics, Anesthetics	64093	LC/MS Pos Late	100020907	1038	352.042		71125-38-7	D00969,C08169	HMDB14952	163	meloxicam	DB00814	M01AC06	M01AC,M01A,M01,M,M01AC,M01A,M01,M	meloxicam	8	meloxicam	meloxicam	Drug - Analgesics, Anesthetics	3	0.00106876	163	0.0580691	0.000192427	x	x	x	x	0	160	3	2644	2807	0	0.981595	0.0184049	1	0.0184049
metformin	Drug - Metabolic	38306	LC/MS Pos Early	100002405	2817	130.109	4091	1115-70-4	C07151	HMDB01921	846	metformin	DB00331	A10BD03	A10BD,A10B,A10,A,A10BD,A10B,A10,A,A10BD,A10B,A10,A,A10BD,A10B,A10,A,A10BD,A10B,A10,A,A10BA,A10B,A10,A,A10BD,A10B,A10,A,A10BD,A10B,A10,A,A10BD,A10B,A10,A,A10BD,A10B,A10,A,A10BD,A10B,A10,A,A10BD,A10B,A10,A,A10BD,A10B,A10,A,A10BD,A10B,A10,A,A10BD,A10B,A10,A,A10BD,A10B,A10,A,A10BD,A10B,A10,A,A10BD,A10B,A10,A	metformin	533	metformin	metformin	Drug - Metabolic	220	0.0783755	846	0.301389	8.65216e-92	x	x	x	x	17	643	203	1944	2807	0.0196987	0.745075	0.235226	0.922727	0.239953
alpha-hydroxymetoprolol	Drug - Cardiovascular	54738	LC/MS Pos Early	100006385	2900	284.186	114962	56392-16-6		HMDB60994	45	metoprolol	DB00264	C07BB02	C07FB,C07F,C07,C,C07FX,C07F,C07,C,C07FX,C07F,C07,C,C07FB,C07F,C07,C,C07AB,C07A,C07,C,C07BB,C07B,C07,C,C07CB,C07C,C07,C,C07BB,C07B,C07,C	metoprolol	12	metoprolol	alpha-hydroxymetoprolol	Drug - Cardiovascular	3	0.00106876	45	0.0160314	3.85364e-06	x	x	x	x	0	42	3	2762	2807	0	0.933333	0.0666667	1	0.0666667
metoprolol acid metabolite*	Drug - Cardiovascular	34109	LC/MS Pos Early	100001385	2950	268.154	62936	56392-14-4			180	metoprolol	DB00264	C07BB02	C07FB,C07F,C07,C,C07FX,C07F,C07,C,C07FX,C07F,C07,C,C07FB,C07F,C07,C,C07AB,C07A,C07,C,C07BB,C07B,C07,C,C07CB,C07C,C07,C,C07BB,C07B,C07,C	metoprolol	12	metoprolol	metoprolol acid metabolite*	Drug - Cardiovascular	3	0.00106876	180	0.0641254	0.000259587	.	.	.	.	0	177	3	2627	2807	0	0.983333	0.0166667	1	0.0166667
metoprolol	Drug - Cardiovascular	18037	LC/MS Pos Late	2028	760	268.191	4171	56392-17-7	D02358	HMDB01932	38	metoprolol	DB00264	C07BB02	C07FB,C07F,C07,C,C07FX,C07F,C07,C,C07FX,C07F,C07,C,C07FB,C07F,C07,C,C07AB,C07A,C07,C,C07BB,C07B,C07,C,C07CB,C07C,C07,C,C07BB,C07B,C07,C	metoprolol	12	metoprolol	metoprolol	Drug - Cardiovascular	3	0.00106876	38	0.0135376	0.0400795	.	.	.	.	2	37	1	2767	2807	0.05	0.925	0.025	0.333333	0.0263158
metronidazole	Drug - Antibiotic	57642	LC/MS Neg	100015878	2339	170.057	4173	73334-05-1	D00409	HMDB15052	51	metronidazole	DB00916	J01RA10	A02BD,A02B,A02,A,A02BD,A02B,A02,A,D06BX,D06B,D06,D,A02BD,A02B,A02,A,J01XD,J01X,J01,J,G01AF,G01A,G01,G,J01RA,J01R,J01,J,A02BD,A02B,A02,A,P01AB,P01A,P01,P,J01RA,J01R,J01,J,A02BD,A02B,A02,A,A01AB,A01A,A01,A,P01AB,P01A,P01,P,G01AF,G01A,G01,G,J01RA,J01R,J01,J	no	0	#N/A	#N/A	#N/A	#N/A	#N/A	#N/A	#N/A	#N/A	#N/A	#N/A	#N/A	#N/A	#N/A	#N/A	#N/A	#N/A	#N/A	#N/A	#N/A	#N/A	#N/A	#N/A
midazolam	Drug - Psychoactive	64122	LC/MS Pos Late	100020946	899	326.085	4192	59467-70-8	C07524,D00550	HMDB14821	4	midazolam	DB00683	N05CD08	N05CD,N05C,N05,N	no	0	#N/A	#N/A	#N/A	#N/A	#N/A	#N/A	#N/A	#N/A	#N/A	#N/A	#N/A	#N/A	#N/A	#N/A	#N/A	#N/A	#N/A	#N/A	#N/A	#N/A	#N/A	#N/A
mirtazapine	Drug - Psychoactive	40437	LC/MS Pos Early	100003450	3353	266.165	4205	61337-67-5	C07570,D00563		2	mirtazapine	DB00370	N06AX11	N06AX,N06A,N06,N	mirtazapine	1	#N/A	#N/A	#N/A	#N/A	#N/A	#N/A	#N/A	#N/A	#N/A	#N/A	#N/A	#N/A	#N/A	#N/A	#N/A	#N/A	#N/A	#N/A	#N/A	#N/A	#N/A	#N/A
montelukast	Drug - Respiratory	64124	LC/MS Pos Late	100020892	1318	586.218	5281040	158966-92-8	D08229,D00529,C07482	HMDB14614	26	montelukast	DB00471	R03DC53	R03DC,R03D,R03,R,R03DC,R03D,R03,R	montelukast	16	montelukast	montelukast	Drug - Respiratory	5	0.00178126	26	0.00926256	2.8777e-08	x	x	x	x	1	22	4	2780	2807	0.037037	0.814815	0.148148	0.8	0.153846
moxifloxacin	Drug - Antibiotic	57671	LC/MS Pos Early	100015905	3272	402.182	152946	186826-86-8	D08237	HMDB14363	4	moxifloxacin	DB00218	J01MA14	S01AE,S01A,S01,S,J01MA,J01M,J01,J	no	0	#N/A	#N/A	#N/A	#N/A	#N/A	#N/A	#N/A	#N/A	#N/A	#N/A	#N/A	#N/A	#N/A	#N/A	#N/A	#N/A	#N/A	#N/A	#N/A	#N/A	#N/A	#N/A
mycophenolic acid	Drug - Antiinflammatory, Immunosuppressant	54800	LC/MS Neg	100009253	4185	319.119	446541	24280-93-1	C20380,D05096	HMDB15159	8	mycophenolic acid	DB01024	L04AA06	L04AA,L04A,L04,L	no	0	#N/A	#N/A	#N/A	#N/A	#N/A	#N/A	#N/A	#N/A	#N/A	#N/A	#N/A	#N/A	#N/A	#N/A	#N/A	#N/A	#N/A	#N/A	#N/A	#N/A	#N/A	#N/A
mycophenolic acid glucuronide	Drug - Antiinflammatory, Immunosuppressant	54792	LC/MS Neg	100009254	2627	495.151	6442661				6	mycophenolic acid	DB01024	L04AA06	L04AA,L04A,L04,L	no	0	#N/A	#N/A	#N/A	#N/A	#N/A	#N/A	#N/A	#N/A	#N/A	#N/A	#N/A	#N/A	#N/A	#N/A	#N/A	#N/A	#N/A	#N/A	#N/A	#N/A	#N/A	#N/A
desmethylnaproxen	Drug - Analgesics, Anesthetics	46331	LC/MS Neg	100001787	3045	215.071	13393711	52079-10-4		HMDB13989	14	naproxen	DB00788	M01AE02	G02CC,G02C,G02,G,M02AA,M02A,M02,M,M01AE,M01A,M01,M,M01AE,M01A,M01,M,M01AE,M01A,M01,M	naproxen	3	naproxen	desmethylnaproxen	Drug - Analgesics, Anesthetics	1	0.000356252	14	0.00498753	0.00498753	.	x	.	x	0	13	1	2793	2807	0	0.928571	0.0714286	1	0.0714286
desmethylnaproxen sulfate	Drug - Analgesics, Anesthetics	46106	LC/MS Neg	100001788	2250	295.028	184679				27	naproxen	DB00788	M01AE02	G02CC,G02C,G02,G,M02AA,M02A,M02,M,M01AE,M01A,M01,M,M01AE,M01A,M01,M,M01AE,M01A,M01,M	naproxen	3	naproxen	desmethylnaproxen sulfate	Drug - Analgesics, Anesthetics	1	0.000356252	27	0.00961881	0.00961881	.	.	.	.	0	26	1	2780	2807	0	0.962963	0.037037	1	0.037037
naproxen	Drug - Analgesics, Anesthetics	12122	LC/MS Neg	1384	4155	229.087	156391	22204-53-1	C01517	HMDB01923	68	naproxen	DB00788	M01AE02	G02CC,G02C,G02,G,M02AA,M02A,M02,M,M01AE,M01A,M01,M,M01AE,M01A,M01,M,M01AE,M01A,M01,M	naproxen	3	naproxen	naproxen	Drug - Analgesics, Anesthetics	1	0.000356252	68	0.0242252	0.0242252	.	.	.	.	0	67	1	2739	2807	0	0.985294	0.0147059	1	0.0147059
nifedipine	Drug - Cardiovascular	34598	LC/MS Neg	100001514	4980	345.109	4485	21829-25-4	D00437,C07266		3	nifedipine	DB01115	C07FB03	C08CA,C08C,C08,C,C08GA,C08G,C08,C,C08CA,C08C,C08,C,C07FB,C07F,C07,C	nifedipine	6	nifedipine	nifedipine	Drug - Cardiovascular	2	0.000712504	3	0.00106876	0.00213675	.	.	.	.	1	2	1	2803	2807	0.25	0.5	0.25	0.5	0.333333
Nimesulide	Drug - Analgesics, Anesthetics	37236	LC/MS Neg	100002072	4347	307.039	4495	51803-78-2	D01049		6	nimesulide	DB04743	M01AX17	M02AA,M02A,M02,M,M01AX,M01A,M01,M	no	0	#N/A	#N/A	#N/A	#N/A	#N/A	#N/A	#N/A	#N/A	#N/A	#N/A	#N/A	#N/A	#N/A	#N/A	#N/A	#N/A	#N/A	#N/A	#N/A	#N/A	#N/A	#N/A
ofloxacin	Drug - Antibiotic	21320	LC/MS Neg	100000673	3600	360.137	4583	82419-36-1	C07321	HMDB01929	6	ofloxacin	DB01165	S02AA16	J01MA,J01M,J01,J,J01RA,J01R,J01,J,S01AE,S01A,S01,S,S02AA,S02A,S02,S	no	0	#N/A	#N/A	#N/A	#N/A	#N/A	#N/A	#N/A	#N/A	#N/A	#N/A	#N/A	#N/A	#N/A	#N/A	#N/A	#N/A	#N/A	#N/A	#N/A	#N/A	#N/A	#N/A
olmesartan	Drug - Cardiovascular	53256	LC/MS Neg	100006239	3747	445.199	158781	144689-24-7	D05246	HMDB14420	2	olmesartan	DB00275	C09DB02	C09DA,C09D,C09,C,C09DX,C09D,C09,C,C09CA,C09C,C09,C,C09DB,C09D,C09,C	no	0	#N/A	#N/A	#N/A	#N/A	#N/A	#N/A	#N/A	#N/A	#N/A	#N/A	#N/A	#N/A	#N/A	#N/A	#N/A	#N/A	#N/A	#N/A	#N/A	#N/A	#N/A	#N/A
omeprazole	Drug - Gastrointestinal	38600	LC/MS Neg	100002725	4673	344.107	4594	73590-58-6	C07324	HMDB01913	67	omeprazole	DB00338	A02BD01	A02BC,A02B,A02,A,A02BD,A02B,A02,A,A02BD,A02B,A02,A	omeprazole	35	omeprazole	omeprazole	Drug - Gastrointestinal	27	0.00961881	67	0.0238689	1.06784e-07	.	x	.	x	19	59	8	2721	2807	0.22093	0.686047	0.0930233	0.296296	0.119403
oseltamivir carboxylate (Ro-64-0802/02)	Drug - Antiviral	40447	LC/MS Neg	100003431	2925	283.166	449381	187227-45-8			0	oseltamivir	DB00198	J05AH02	J05AH,J05A,J05,J	no	0	#N/A	#N/A	#N/A	#N/A	#N/A	#N/A	#N/A	#N/A	#N/A	#N/A	#N/A	#N/A	#N/A	#N/A	#N/A	#N/A	#N/A	#N/A	#N/A	#N/A	#N/A	#N/A
oxypurinol	Drug - Metabolic	41726	LC/MS Polar	100002489	1656	151.026	4644	2465-59-0	D02365	HMDB00786	282	oxypurinol	DB05262	N/A	N/A	no	0	#N/A	#N/A	#N/A	#N/A	#N/A	#N/A	#N/A	#N/A	#N/A	#N/A	#N/A	#N/A	#N/A	#N/A	#N/A	#N/A	#N/A	#N/A	#N/A	#N/A	#N/A	#N/A
pantoprazole	Drug - Gastrointestinal	38609	LC/MS Neg	100002808	4398	382.068	4679	102625-70-7	C11806	HMDB05017	88	pantoprazole	DB00213	A02BC02	A02BD,A02B,A02,A,A02BD,A02B,A02,A,A02BC,A02B,A02,A	pantoprazole	31	pantoprazole	pantoprazole	Drug - Gastrointestinal	12	0.00427503	88	0.0313502	3.95316e-12	x	x	x	x	3	79	9	2716	2807	0.032967	0.868132	0.0989011	0.75	0.102273
perindopril	Drug - Cardiovascular	52372	LC/MS Pos Late	100006237	904	369.238	107807	82834-16-0	C07706,D03753	HMDB14928	14	perindopril	DB00790	C10BX14	C09BX,C09B,C09,C,C09BA,C09B,C09,C,C10BX,C10B,C10,C,C10BX,C10B,C10,C,C09AA,C09A,C09,C,C09BX,C09B,C09,C,C10BX,C10B,C10,C,C09BB,C09B,C09,C,C10BX,C10B,C10,C,C10BX,C10B,C10,C	perindopril	30	perindopril	perindopril	Drug - Cardiovascular	12	0.00427503	14	0.00498753	1.07536e-09	x	x	x	x	7	9	5	2786	2807	0.333333	0.428571	0.238095	0.416667	0.357143
hydroxypioglitazone (M-IV)	Drug - Metabolic	43580	LC/MS Pos Late	100004177	665	373.122		146062-44-4			23	pioglitazone	DB01132	A10BD12	A10BD,A10B,A10,A,A10BG,A10B,A10,A,A10BD,A10B,A10,A,A10BD,A10B,A10,A,A10BD,A10B,A10,A	pioglitazone	18	pioglitazone	hydroxypioglitazone (M-IV)	Drug - Metabolic	5	0.00178126	23	0.0081938	1.70595e-08	x	x	x	x	1	19	4	2783	2807	0.0416667	0.791667	0.166667	0.8	0.173913
pioglitazone	Drug - Metabolic	33139	LC/MS Pos Early	100001317	3240	357.127	4829	112529-15-4	C07675	HMDB15264	30	pioglitazone	DB01132	A10BD12	A10BD,A10B,A10,A,A10BG,A10B,A10,A,A10BD,A10B,A10,A,A10BD,A10B,A10,A,A10BD,A10B,A10,A	pioglitazone	18	pioglitazone	pioglitazone	Drug - Metabolic	5	0.00178126	30	0.0106876	5.26909e-08	.	.	x	x	1	26	4	2776	2807	0.0322581	0.83871	0.129032	0.8	0.133333
ketopioglitazone	Drug - Metabolic	43579	LC/MS Neg	100004176	4165	369.091		146062-45-5			69	pioglitazone	DB01132	A10BD12	A10BD,A10B,A10,A,A10BG,A10B,A10,A,A10BD,A10B,A10,A,A10BD,A10B,A10,A,A10BD,A10B,A10,A	pioglitazone	18	pioglitazone	ketopioglitazone	Drug - Metabolic	5	0.00178126	69	0.0245814	1.64351e-06	.	.	.	.	1	65	4	2737	2807	0.0142857	0.928571	0.0571429	0.8	0.057971
pregabalin	Drug - Neurological	52913	LC/MS Pos Early	100008943	3123	160.133	4715169	148553-50-8			16	pregabalin	DB00230	N03AX16	N03AX,N03A,N03,N	pregabalin	9	pregabalin	pregabalin	Drug - Neurological	7	0.00249377	16	0.00570004	6.29756e-11	x	x	x	x	2	11	5	2789	2807	0.111111	0.611111	0.277778	0.714286	0.3125
pseudoephedrine	Drug - Respiratory	39586	LC/MS Pos Early	100002738	3041	166.123	7028	90-82-4	C02765	HMDB01943	117	pseudoephedrine	DB00852	R01BA02	R01BA,R01B,R01,R,R01BA,R01B,R01,R	no	0	#N/A	#N/A	#N/A	#N/A	#N/A	#N/A	#N/A	#N/A	#N/A	#N/A	#N/A	#N/A	#N/A	#N/A	#N/A	#N/A	#N/A	#N/A	#N/A	#N/A	#N/A	#N/A
quetiapine	Drug - Psychoactive	39787	LC/MS Pos Late	100002809	874	384.174	5002	111974-69-7	C07397	HMDB05021	3	quetiapine	DB01224	N05AH04	N05AH,N05A,N05,N	quetiapine	4	quetiapine	quetiapine	Drug - Psychoactive	3	0.00106876	3	0.00106876	2.28475e-06	x	x	x	x	1	1	2	2803	2807	0.25	0.25	0.5	0.666667	0.666667
ranitidine	Drug - Gastrointestinal	38595	LC/MS Pos Early	100002735	2910	315.149	3001055	66357-59-3	D00422	HMDB01930	42	ranitidine	DB00863	A02BA02	A02BA,A02B,A02,A,A02BA,A02B,A02,A	ranitidine	25	ranitidine	ranitidine	Drug - Gastrointestinal	14	0.00498753	42	0.0149626	3.89249e-05	x	x	x	x	10	38	4	2755	2807	0.192308	0.730769	0.0769231	0.285714	0.0952381
ranitidine N-oxide*	Drug - Gastrointestinal	62485	LC/MS Pos Early	100020810	2926	331.143	3033888				20	ranitidine	DB00863	A02BA02	A02BA,A02B,A02,A,A02BA,A02B,A02,A	ranitidine	25	ranitidine	ranitidine N-oxide*	Drug - Gastrointestinal	14	0.00498753	20	0.00712504	0.00417047	.	.	x	x	12	18	2	2775	2807	0.375	0.5625	0.0625	0.142857	0.1
repaglinide	Drug - Metabolic	64108	LC/MS Neg	100020886	5290	451.26	65981	135062-02-1	D00594,C07670	HMDB15048	3	repaglinide	DB00912	A10BX02	A10BD,A10B,A10,A,A10BX,A10B,A10,A	repaglinide	3	repaglinide	repaglinide	Drug - Metabolic	2	0.000712504	3	0.00106876	7.61765e-07	x	x	x	x	0	1	2	2804	2807	0	0.333333	0.666667	1	0.666667
rivaroxaban	Drug - Cardiovascular	52958	LC/MS Neg	100008950	4425	434.058	6433119	366789-02-8			2	rivaroxaban	DB06228	B01AF01	B01AF,B01A,B01,B	rivaroxaban	3	rivaroxaban	rivaroxaban	Drug - Cardiovascular	1	0.000356252	2	0.000712504	0.000712505	x	x	x	x	0	1	1	2805	2807	0	0.5	0.5	1	0.5
1-hydroxy-2-naphthalenecarboxylate	Drug - Other	38140	LC/MS Neg	100002394	3930	187.04	6844	86-48-6	C03203		403	salmeterol	DB00938	R03AC12	R03AK,R03A,R03,R,R03AK,R03A,R03,R,R03AC,R03A,R03,R	no	0	salmeterol	1-hydroxy-2-naphthalenecarboxylate	Drug - Other	5	0.00178126	403	0.14357	5.97096e-05	x	x	x	x	0	398	5	2404	2807	0	0.987593	0.0124069	1	0.0124069
norfluoxetine	Drug - Psychoactive	37252	LC/MS Pos Late	100003769	1008	296.126	4541	83891-03-6		HMDB60551	16	seproxetine	DB06731	N/A	N/A	no	0	#N/A	#N/A	#N/A	#N/A	#N/A	#N/A	#N/A	#N/A	#N/A	#N/A	#N/A	#N/A	#N/A	#N/A	#N/A	#N/A	#N/A	#N/A	#N/A	#N/A	#N/A	#N/A
sildenafil	Drug - Cardiovascular	52961	LC/MS Pos Late	100008971	946	475.212	5212	139755-83-2	C07259,D08514	HMDB05039	4	sildenafil	DB00203	G04BE03	G01AE,G01A,G01,G,G04BE,G04B,G04,G	sildenafil	2	#N/A	#N/A	#N/A	#N/A	#N/A	#N/A	#N/A	#N/A	#N/A	#N/A	#N/A	#N/A	#N/A	#N/A	#N/A	#N/A	#N/A	#N/A	#N/A	#N/A	#N/A	#N/A
sitagliptin	Drug - Metabolic	52954	LC/MS Neg	100008964	4485	468.111	11306691	486460-32-6			111	sitagliptin	DB01261	A10BD12	A10BH,A10B,A10,A,A10BD,A10B,A10,A,A10BD,A10B,A10,A,A10BH,A10B,A10,A,A10BD,A10B,A10,A	sitagliptin	78	sitagliptin	sitagliptin	Drug - Metabolic	37	0.0131813	111	0.039544	1.49545e-49	.	x	.	x	2	76	35	2694	2807	0.0176991	0.672566	0.309735	0.945946	0.315315
N4-acetyl-5-hydroxysulfamethoxazole*	Drug - Antibiotic	62107	LC/MS Neg	100020244	1745	310.05					27	sulfamethoxazole	DB01015	J01EC01	J04AM,J04A,J04,J,J01EE,J01E,J01,J,G01AE,G01A,G01,G,J01EC,J01E,J01,J	no	0	#N/A	#N/A	#N/A	#N/A	#N/A	#N/A	#N/A	#N/A	#N/A	#N/A	#N/A	#N/A	#N/A	#N/A	#N/A	#N/A	#N/A	#N/A	#N/A	#N/A	#N/A	#N/A
sulfamethoxazole	Drug - Antibiotic	53240	LC/MS Pos Early	100009327	2405	254.059	5329		D00285,C07315,D00447	HMDB15150	3	sulfamethoxazole	DB01015	J01EC01	J04AM,J04A,J04,J,J01EE,J01E,J01,J,G01AE,G01A,G01,G,J01EC,J01E,J01,J	no	0	#N/A	#N/A	#N/A	#N/A	#N/A	#N/A	#N/A	#N/A	#N/A	#N/A	#N/A	#N/A	#N/A	#N/A	#N/A	#N/A	#N/A	#N/A	#N/A	#N/A	#N/A	#N/A
N4-acetylsulfamethoxazole*	Drug - Antibiotic	62106	LC/MS Neg	100020243	2489	294.055	65280		C13061,D01601	HMDB13854	2	sulfamethoxazole	DB01015	J01EC01	J04AM,J04A,J04,J,J01EE,J01E,J01,J,G01AE,G01A,G01,G,J01EC,J01E,J01,J	no	0	#N/A	#N/A	#N/A	#N/A	#N/A	#N/A	#N/A	#N/A	#N/A	#N/A	#N/A	#N/A	#N/A	#N/A	#N/A	#N/A	#N/A	#N/A	#N/A	#N/A	#N/A	#N/A
N-acetyl sulfapyridine	Drug - Antibiotic	48680	LC/MS Pos Early	100006229	2146	292.075	58638	19077-98-6			3	sulfapyridine	DB00891	J01EB04	G01AE,G01A,G01,G,J01EB,J01E,J01,J	no	0	#N/A	#N/A	#N/A	#N/A	#N/A	#N/A	#N/A	#N/A	#N/A	#N/A	#N/A	#N/A	#N/A	#N/A	#N/A	#N/A	#N/A	#N/A	#N/A	#N/A	#N/A	#N/A
tadalafil	Drug - Cardiovascular	52950	LC/MS Neg	100008974	4898	388.13	4687521	171596-29-5			82	tadalafil	DB00820	C02KX52	G04BE,G04B,G04,G,C02KX,C02K,C02,C	tadalafil	3	#N/A	#N/A	#N/A	#N/A	#N/A	#N/A	#N/A	#N/A	#N/A	#N/A	#N/A	#N/A	#N/A	#N/A	#N/A	#N/A	#N/A	#N/A	#N/A	#N/A	#N/A	#N/A
tamoxifen	Drug - Antineoplastic	64205	LC/MS Pos Late	100021080	1225	372.232	2733526	10540-29-1	D08559,C07108	HMDB14813	6	tamoxifen	DB00675	L02BA01	L02BA,L02B,L02,L	tamoxifen	1	tamoxifen	tamoxifen	Drug - Antineoplastic	1	0.000356252	6	0.00213751	0.00213751	x	x	x	x	0	5	1	2801	2807	0	0.833333	0.166667	1	0.166667
THC carboxylic acid	Drug - Psychoactive	61836	LC/MS Neg	100016048	5263	343.191	107885				21	tetrahydrocannabinol	N/A	N/A	N/A	no	0	#N/A	#N/A	#N/A	#N/A	#N/A	#N/A	#N/A	#N/A	#N/A	#N/A	#N/A	#N/A	#N/A	#N/A	#N/A	#N/A	#N/A	#N/A	#N/A	#N/A	#N/A	#N/A
THC carboxylic acid glucuronide	Drug - Psychoactive	61848	LC/MS Neg	100016049	5224	519.224					13	tetrahydrocannabinol	N/A	N/A	N/A	no	0	#N/A	#N/A	#N/A	#N/A	#N/A	#N/A	#N/A	#N/A	#N/A	#N/A	#N/A	#N/A	#N/A	#N/A	#N/A	#N/A	#N/A	#N/A	#N/A	#N/A	#N/A	#N/A
topiramate	Drug - Neurological	2772	LC/MS Neg	1388	4021	338.092	5284627	97240-79-4	C07502	HMDB05034	20	topiramate	DB00273	N03AX11	N03AX,N03A,N03,N	topiramate	12	topiramate	topiramate	Drug - Neurological	7	0.00249377	20	0.00712504	2.86681e-16	x	x	x	x	0	13	7	2787	2807	0	0.65	0.35	1	0.35
torasemide	Drug - Cardiovascular	64201	LC/MS Neg	100021794	4545	347.118		56211-40-6			1	torasemide	DB00214	G01AE10	C03CA,C03C,C03,C,G01AE,G01A,G01,G	no	0	#N/A	#N/A	#N/A	#N/A	#N/A	#N/A	#N/A	#N/A	#N/A	#N/A	#N/A	#N/A	#N/A	#N/A	#N/A	#N/A	#N/A	#N/A	#N/A	#N/A	#N/A	#N/A
tramadol	Drug - Analgesics, Anesthetics	53241	LC/MS Pos Early	100006381	3288	264.196	33741	27203-92-5	C07153	HMDB14339	24	tramadol	DB00193	N02AX02	N02AJ,N02A,N02,N,N02AJ,N02A,N02,N,N02AX,N02A,N02,N	tramadol	1	tramadol	tramadol	Drug - Analgesics, Anesthetics	1	0.000356252	24	0.00855005	0.00855005	x	x	x	x	0	23	1	2783	2807	0	0.958333	0.0416667	1	0.0416667
O-desmethyltramadol glucuronide	Drug - Analgesics, Anesthetics	52357	LC/MS Pos Early	100006383	2741	426.212		383891-39-2			20	tramadol	DB00193	N02AX02	N02AJ,N02A,N02,N,N02AJ,N02A,N02,N,N02AX,N02A,N02,N	tramadol	1	#N/A	#N/A	#N/A	#N/A	#N/A	#N/A	#N/A	#N/A	#N/A	#N/A	#N/A	#N/A	#N/A	#N/A	#N/A	#N/A	#N/A	#N/A	#N/A	#N/A	#N/A	#N/A
O-desmethyltramadol	Drug - Analgesics, Anesthetics	53239	LC/MS Pos Early	100006382	3045	250.18	130829	73986-53-5		HMDB60997	0	tramadol	DB00193	N02AX02	N02AJ,N02A,N02,N,N02AJ,N02A,N02,N,N02AX,N02A,N02,N	tramadol	1	#N/A	#N/A	#N/A	#N/A	#N/A	#N/A	#N/A	#N/A	#N/A	#N/A	#N/A	#N/A	#N/A	#N/A	#N/A	#N/A	#N/A	#N/A	#N/A	#N/A	#N/A	#N/A
valsartan	Drug - Cardiovascular	48566	LC/MS Neg	100006232	4228	434.22	5650	137862-53-4			171	valsartan	DB00177	C09DX04	C09DX,C09D,C09,C,C10BX,C10B,C10,C,C09DA,C09D,C09,C,C09CA,C09C,C09,C,C09DX,C09D,C09,C,C09DX,C09D,C09,C,C09DB,C09D,C09,C,C09DB,C09D,C09,C,C09DX,C09D,C09,C	valsartan	87	valsartan	valsartan	Drug - Cardiovascular	40	0.0142501	171	0.0609191	7.04509e-46	x	x	x	x	2	133	38	2634	2807	0.0115607	0.768786	0.219653	0.95	0.222222
N,O-didesmethylvenlafaxine glucuronide	Drug - Psychoactive	52358	LC/MS Pos Early	100006001	2902	426.212		1021933-99-2		HMDB61167	2	venlafaxine	DB00285	N06AX16	N06AX,N06A,N06,N	venlafaxine	5	venlafaxine	N,O-didesmethylvenlafaxine glucuronide	Drug - Psychoactive	1	0.000356252	2	0.000712504	0.000712505	.	.	x	x	0	1	1	2805	2807	0	0.5	0.5	1	0.5
O-desmethylvenlafaxine	Drug - Psychoactive	43334	LC/MS Pos Early	100004173	3253	264.196	125017	300827-87-6	D07793	HMDB60532	2	venlafaxine	DB00285	N06AX16	N06AX,N06A,N06,N	venlafaxine	5	venlafaxine	O-desmethylvenlafaxine	Drug - Psychoactive	1	0.000356252	2	0.000712504	0.000712505	.	.	x	x	0	1	1	2805	2807	0	0.5	0.5	1	0.5
venlafaxine	Drug - Psychoactive	38623	LC/MS Pos Late	100002807	848	278.211	5656	93413-69-5	C07187	HMDB05016	2	venlafaxine	DB00285	N06AX16	N06AX,N06A,N06,N	venlafaxine	5	venlafaxine	venlafaxine	Drug - Psychoactive	1	0.000356252	2	0.000712504	0.000712505	x	x	x	x	0	1	1	2805	2807	0	0.5	0.5	1	0.5
verapamil	Drug - Cardiovascular	42990	LC/MS Pos Late	100004028	945	455.29	2520	152-11-4	D02356	HMDB01850	6	verapamil	DB00661	C08DA01	C09BB,C09B,C09,C,C08DA,C08D,C08,C,C08DA,C08D,C08,C	verapamil	4	verapamil	verapamil	Drug - Cardiovascular	2	0.000712504	6	0.00213751	0.00427122	x	x	x	x	1	5	1	2800	2807	0.142857	0.714286	0.142857	0.5	0.166667
10-hydroxywarfarin	Drug - Cardiovascular	62970	LC/MS Neg	100020811	3910	323.092					13	warfarin	DB00682	B01AA03	B01AA,B01A,B01,B	warfarin	14	warfarin	10-hydroxywarfarin	Drug - Cardiovascular	9	0.00320627	13	0.00463128	2.4292e-23	x	x	x	x	0	4	9	2794	2807	0	0.307692	0.692308	1	0.692308
6-hydroxywarfarin	Drug - Cardiovascular	62973	LC/MS Neg	100020814	3358	323.092					13	warfarin	DB00682	B01AA03	B01AA,B01A,B01,B	warfarin	14	warfarin	6-hydroxywarfarin	Drug - Cardiovascular	9	0.00320627	13	0.00463128	2.4292e-23	.	.	x	x	0	4	9	2794	2807	0	0.307692	0.692308	1	0.692308
7-hydroxywarfarin	Drug - Cardiovascular	62972	LC/MS Neg	100020813	3300	323.092					18	warfarin	DB00682	B01AA03	B01AA,B01A,B01,B	warfarin	14	warfarin	7-hydroxywarfarin	Drug - Cardiovascular	9	0.00320627	18	0.00641254	1.65185e-21	.	.	x	x	0	9	9	2789	2807	0	0.5	0.5	1	0.5
warfarin	Drug - Cardiovascular	43335	LC/MS Neg	100004175	3790	307.098		5543-57-7	C01541	HMDB01935	76	warfarin	DB00682	B01AA03	B01AA,B01A,B01,B	warfarin	14	warfarin	warfarin	Drug - Cardiovascular	9	0.00320627	76	0.0270752	4.84028e-15	.	.	x	x	0	67	9	2731	2807	0	0.881579	0.118421	1	0.118421

## Sheet: Table S4
Table S4: Overlap between self-reported and blood-detected drug metabolites (limitted to significant overlaps with p<0.05, Fisher test).
Self reported medication	Metabolite detected in blood	Metabolon SUB_PATHWAY	N self	% reported	N blood	% detected	P-value (Fisher)	Strongest Both	Strongest Self	Strongest Blood	Strongest One	Self only	Blood only	Both	Neither	Total	Self only/either	Blood only/either	Both/either	Both/Self reported (self-reported and detected)	Both/detected
metformin	metformin	Drug - Metabolic	220	0.0783755	846	0.301389	8.65216e-92	x	x	x	x	17	643	203	1944	2807	0.0196987	0.745075	0.235226	0.922727	0.239953
atorvastatin	o-hydroxyatorvastatin	Drug - Metabolic	90	0.0320627	110	0.0391877	3.096e-76	x	x	x	x	27	47	63	2670	2807	0.19708	0.343066	0.459854	0.7	0.572727
metformin	sitagliptin	Drug - Metabolic	220	0.0783755	111	0.039544	1.77316e-53	.	.	x	x	150	41	70	2546	2807	0.574713	0.157088	0.268199	0.318182	0.630631
sitagliptin	sitagliptin	Drug - Metabolic	37	0.0131813	111	0.039544	1.49545e-49	.	x	.	x	2	76	35	2694	2807	0.0176991	0.672566	0.309735	0.945946	0.315315
valsartan	valsartan	Drug - Cardiovascular	40	0.0142501	171	0.0609191	7.04509e-46	x	x	x	x	2	133	38	2634	2807	0.0115607	0.768786	0.219653	0.95	0.222222
losartan	losartan	Drug - Cardiovascular	24	0.00855005	27	0.00961881	3.66328e-38	x	x	x	x	5	8	19	2775	2807	0.15625	0.25	0.59375	0.791667	0.703704
metformin	o-hydroxyatorvastatin	Drug - Metabolic	220	0.0783755	110	0.0391877	1.61348e-30	.	.	.	.	168	58	52	2529	2807	0.604317	0.208633	0.18705	0.236364	0.472727
gliclazide	Gliclazide	Drug - Metabolic	47	0.0167439	468	0.166726	6.17073e-30	x	x	x	x	4	425	43	2335	2807	0.00847458	0.900424	0.0911017	0.914894	0.0918803
atorvastatin	atorvastatin (lipitor)	Drug - Metabolic	90	0.0320627	45	0.0160314	2.50717e-27	.	.	x	x	65	20	25	2697	2807	0.590909	0.181818	0.227273	0.277778	0.555556
indapamide	indapamide	Drug - Cardiovascular	15	0.00534378	34	0.0121126	9.15926e-25	x	x	x	x	2	21	13	2771	2807	0.0555556	0.583333	0.361111	0.866667	0.382353
warfarin	10-hydroxywarfarin	Drug - Cardiovascular	9	0.00320627	13	0.00463128	2.4292e-23	x	x	x	x	0	4	9	2794	2807	0	0.307692	0.692308	1	0.692308
warfarin	6-hydroxywarfarin	Drug - Cardiovascular	9	0.00320627	13	0.00463128	2.4292e-23	.	.	x	x	0	4	9	2794	2807	0	0.307692	0.692308	1	0.692308
valsartan	hydrochlorothiazide	Drug - Cardiovascular	40	0.0142501	53	0.0188814	3.25045e-22	.	.	x	x	22	35	18	2732	2807	0.293333	0.466667	0.24	0.45	0.339623
atenolol	atenolol	Drug - Cardiovascular	18	0.00641254	140	0.0498753	4.81316e-22	x	x	x	x	1	123	17	2666	2807	0.0070922	0.87234	0.120567	0.944444	0.121429
warfarin	7-hydroxywarfarin	Drug - Cardiovascular	9	0.00320627	18	0.00641254	1.65185e-21	.	.	x	x	0	9	9	2789	2807	0	0.5	0.5	1	0.5
acetylsalicylic acid	salicyluric glucuronide*	Drug - Analgesics, Anesthetics	111	0.039544	1292	0.460278	2.45004e-21	x	x	x	x	13	1194	98	1502	2807	0.00996169	0.914943	0.0750958	0.882883	0.0758514
escitalopram	citalopram/escitalopram	Drug - Psychoactive	10	0.00356252	31	0.0110438	5.38547e-21	x	x	x	x	0	21	10	2776	2807	0	0.677419	0.322581	1	0.322581
esomeprazole	omeprazole	Drug - Gastrointestinal	26	0.00926256	67	0.0238689	7.3761e-21	x	x	x	x	10	51	16	2730	2807	0.12987	0.662338	0.207792	0.615385	0.238806
escitalopram	citalopram propionate*	Drug - Psychoactive	10	0.00356252	34	0.0121126	1.59223e-20	.	.	x	x	0	24	10	2773	2807	0	0.705882	0.294118	1	0.294118
unspecified diabetes	metformin	Drug - Metabolic	50	0.0178126	846	0.301389	2.77051e-20	.	x	.	x	4	800	46	1957	2807	0.00470588	0.941176	0.0541176	0.92	0.0543735
glimepiride	Glimepiride	Drug - Metabolic	18	0.00641254	25	0.00890631	1.67014e-17	x	x	x	x	8	15	10	2774	2807	0.242424	0.454545	0.30303	0.555556	0.4
acetylsalicylic acid	o-hydroxyatorvastatin	Drug - Metabolic	111	0.039544	110	0.0391877	1.38753e-16	.	.	.	.	83	82	28	2614	2807	0.430052	0.42487	0.145078	0.252252	0.254545
topiramate	topiramate	Drug - Neurological	7	0.00249377	20	0.00712504	2.86681e-16	x	x	x	x	0	13	7	2787	2807	0	0.65	0.35	1	0.35
atenolol	metoprolol acid metabolite*	Drug - Cardiovascular	18	0.00641254	180	0.0641254	4.99709e-16	.	.	x	x	3	165	15	2624	2807	0.0163934	0.901639	0.0819672	0.833333	0.0833333
metformin	atorvastatin (lipitor)	Drug - Metabolic	220	0.0783755	45	0.0160314	7.49243e-16	.	.	.	.	196	21	24	2566	2807	0.813278	0.0871369	0.0995851	0.109091	0.533333
sitagliptin	metformin	Drug - Metabolic	37	0.0131813	846	0.301389	3.46692e-15	.	.	.	.	3	812	34	1958	2807	0.00353357	0.956419	0.0400471	0.918919	0.0401891
gliclazide	metformin	Drug - Metabolic	47	0.0167439	846	0.301389	4.58551e-15	.	.	.	.	7	806	40	1954	2807	0.00820633	0.9449	0.0468933	0.851064	0.0472813
warfarin	warfarin	Drug - Cardiovascular	9	0.00320627	76	0.0270752	4.84028e-15	.	.	x	x	0	67	9	2731	2807	0	0.881579	0.118421	1	0.118421
unspecified diabetes	sitagliptin	Drug - Metabolic	50	0.0178126	111	0.039544	5.17424e-15	.	.	.	.	31	92	19	2665	2807	0.21831	0.647887	0.133803	0.38	0.171171
acetylsalicylic acid	sitagliptin	Drug - Metabolic	111	0.039544	111	0.039544	1.84572e-14	.	.	.	.	85	85	26	2611	2807	0.433673	0.433673	0.132653	0.234234	0.234234
unspecified dyslipidemia	o-hydroxyatorvastatin	Drug - Metabolic	143	0.0509441	110	0.0391877	1.96878e-14	.	x	.	x	114	81	29	2583	2807	0.508929	0.361607	0.129464	0.202797	0.263636
escitalopram	desmethylcitalopram*	Drug - Psychoactive	10	0.00356252	21	0.0074813	5.09281e-14	.	.	x	x	3	14	7	2783	2807	0.125	0.583333	0.291667	0.7	0.333333
metformin	Glimepiride	Drug - Metabolic	220	0.0783755	25	0.00890631	5.41143e-14	.	.	.	.	203	8	17	2579	2807	0.890351	0.0350877	0.0745614	0.0772727	0.68
unspecified hypertension	hydrochlorothiazide	Drug - Cardiovascular	98	0.0349127	53	0.0188814	4.83988e-13	.	x	.	x	81	36	17	2673	2807	0.604478	0.268657	0.126866	0.173469	0.320755
unspecified hypertension	valsartan	Drug - Cardiovascular	98	0.0349127	171	0.0609191	7.29202e-13	.	.	.	.	70	143	28	2566	2807	0.290456	0.593361	0.116183	0.285714	0.163743
acetylsalicylic acid	metformin	Drug - Metabolic	111	0.039544	846	0.301389	1.61601e-12	.	.	.	.	42	777	69	1919	2807	0.0472973	0.875	0.0777027	0.621622	0.0815603
pantoprazole	pantoprazole	Drug - Gastrointestinal	12	0.00427503	88	0.0313502	3.95316e-12	x	x	x	x	3	79	9	2716	2807	0.032967	0.868132	0.0989011	0.75	0.102273
insulin aspart	atorvastatin (lipitor)	Drug - Metabolic	63	0.0224439	45	0.0160314	4.25289e-12	.	x	.	x	50	32	13	2712	2807	0.526316	0.336842	0.136842	0.206349	0.288889
unspecified dyslipidemia	metformin	Drug - Metabolic	143	0.0509441	846	0.301389	4.305e-12	.	.	.	.	61	764	82	1900	2807	0.0672547	0.842337	0.0904079	0.573427	0.0969267
gliclazide	sitagliptin	Drug - Metabolic	47	0.0167439	111	0.039544	6.54732e-12	.	.	.	.	31	95	16	2665	2807	0.21831	0.669014	0.112676	0.340426	0.144144
unspecified dyslipidemia	sitagliptin	Drug - Metabolic	143	0.0509441	111	0.039544	1.0683e-11	.	.	.	.	117	85	26	2579	2807	0.513158	0.372807	0.114035	0.181818	0.234234
celecoxib	celecoxib	Drug - Analgesics, Anesthetics	18	0.00641254	58	0.0206626	1.52454e-11	x	x	x	x	9	49	9	2740	2807	0.134328	0.731343	0.134328	0.5	0.155172
unspecified hypertension	indapamide	Drug - Cardiovascular	98	0.0349127	34	0.0121126	2.60144e-11	.	.	.	.	85	21	13	2688	2807	0.714286	0.176471	0.109244	0.132653	0.382353
atorvastatin	metformin	Drug - Metabolic	90	0.0320627	846	0.301389	4.23292e-11	.	.	.	.	33	789	57	1928	2807	0.0375427	0.897611	0.0648464	0.633333	0.0673759
pregabalin	pregabalin	Drug - Neurological	7	0.00249377	16	0.00570004	6.29756e-11	x	x	x	x	2	11	5	2789	2807	0.111111	0.611111	0.277778	0.714286	0.3125
metformin	hydrochlorothiazide	Drug - Cardiovascular	220	0.0783755	53	0.0188814	7.95158e-11	.	.	.	.	199	32	21	2555	2807	0.789683	0.126984	0.0833333	0.0954545	0.396226
insulin aspart	o-hydroxyatorvastatin	Drug - Metabolic	63	0.0224439	110	0.0391877	7.97585e-11	.	.	.	.	46	93	17	2651	2807	0.294872	0.596154	0.108974	0.269841	0.154545
unspecified hypertension	o-hydroxyatorvastatin	Drug - Metabolic	98	0.0349127	110	0.0391877	3.61918e-10	.	.	.	.	78	90	20	2619	2807	0.414894	0.478723	0.106383	0.204082	0.181818
atorvastatin	hydrochlorothiazide	Drug - Cardiovascular	90	0.0320627	53	0.0188814	3.78997e-10	.	.	.	.	76	39	14	2678	2807	0.589147	0.302326	0.108527	0.155556	0.264151
insulin aspart	metformin	Drug - Metabolic	63	0.0224439	846	0.301389	4.2707e-10	.	.	.	.	20	803	43	1941	2807	0.0230947	0.927252	0.0496536	0.68254	0.0508274
atorvastatin	sitagliptin	Drug - Metabolic	90	0.0320627	111	0.039544	6.72237e-10	.	.	.	.	71	92	19	2625	2807	0.39011	0.505495	0.104396	0.211111	0.171171
fexofenadine	fexofenadine	Drug - Respiratory	12	0.00427503	57	0.0203064	7.15726e-10	x	x	x	x	5	50	7	2745	2807	0.0806452	0.806452	0.112903	0.583333	0.122807
insulin aspart	sitagliptin	Drug - Metabolic	63	0.0224439	111	0.039544	9.43697e-10	.	.	.	.	47	95	16	2649	2807	0.297468	0.601266	0.101266	0.253968	0.144144
perindopril	perindopril	Drug - Cardiovascular	12	0.00427503	14	0.00498753	1.07536e-09	x	x	x	x	7	9	5	2786	2807	0.333333	0.428571	0.238095	0.416667	0.357143
unspecified hypertension	metformin	Drug - Metabolic	98	0.0349127	846	0.301389	1.60481e-09	.	.	.	.	40	788	58	1921	2807	0.0451467	0.889391	0.0654628	0.591837	0.0685579
metformin	Gliclazide	Drug - Metabolic	220	0.0783755	468	0.166726	2.51429e-09	.	.	.	.	149	397	71	2190	2807	0.241491	0.643436	0.115073	0.322727	0.151709
pioglitazone	hydroxypioglitazone (M-IV)	Drug - Metabolic	5	0.00178126	23	0.0081938	1.70595e-08	x	x	x	x	1	19	4	2783	2807	0.0416667	0.791667	0.166667	0.8	0.173913
acetaminophen	2-methoxyacetaminophen glucuronide*	Drug - Analgesics, Anesthetics	17	0.00605629	419	0.14927	2.07504e-08	x	x	x	x	4	406	13	2384	2807	0.00945626	0.959811	0.0307329	0.764706	0.0310263
rosuvastatin	valsartan	Drug - Cardiovascular	65	0.0231564	171	0.0609191	2.23974e-08	.	x	.	x	47	153	18	2589	2807	0.215596	0.701835	0.0825688	0.276923	0.105263
montelukast	montelukast	Drug - Respiratory	5	0.00178126	26	0.00926256	2.8777e-08	x	x	x	x	1	22	4	2780	2807	0.037037	0.814815	0.148148	0.8	0.153846
pioglitazone	pioglitazone	Drug - Metabolic	5	0.00178126	30	0.0106876	5.26909e-08	.	.	x	x	1	26	4	2776	2807	0.0322581	0.83871	0.129032	0.8	0.133333
acetaminophen	2-hydroxyacetaminophen sulfate*	Drug - Analgesics, Anesthetics	17	0.00605629	575	0.204845	7.36248e-08	.	.	x	x	3	561	14	2229	2807	0.00519031	0.970588	0.0242215	0.823529	0.0243478
sitagliptin	o-hydroxyatorvastatin	Drug - Metabolic	37	0.0131813	110	0.0391877	7.37491e-08	.	.	.	.	26	99	11	2671	2807	0.191176	0.727941	0.0808824	0.297297	0.1
acetaminophen	4-acetamidophenol	Drug - Analgesics, Anesthetics	17	0.00605629	708	0.252227	7.61852e-08	.	.	x	x	2	693	15	2097	2807	0.0028169	0.976056	0.0211268	0.882353	0.0211864
hydrochlorothiazide	hydrochlorothiazide	Drug - Cardiovascular	8	0.00285002	53	0.0188814	1.06367e-07	.	x	.	x	3	48	5	2751	2807	0.0535714	0.857143	0.0892857	0.625	0.0943396
omeprazole	omeprazole	Drug - Gastrointestinal	27	0.00961881	67	0.0238689	1.06784e-07	.	x	.	x	19	59	8	2721	2807	0.22093	0.686047	0.0930233	0.296296	0.119403
metformin	salicyluric glucuronide*	Drug - Analgesics, Anesthetics	220	0.0783755	1292	0.460278	1.44449e-07	.	.	.	.	81	1153	139	1434	2807	0.0589949	0.839767	0.101238	0.631818	0.107585
glimepiride	sitagliptin	Drug - Metabolic	18	0.00641254	111	0.039544	1.4641e-07	.	.	.	.	10	103	8	2686	2807	0.0826446	0.85124	0.0661157	0.444444	0.0720721
unspecified dyslipidemia	hydrochlorothiazide	Drug - Cardiovascular	143	0.0509441	53	0.0188814	1.82301e-07	.	.	.	.	129	39	14	2625	2807	0.708791	0.214286	0.0769231	0.0979021	0.264151
acetaminophen	3-(methylthio)acetaminophen sulfate*	Drug - Analgesics, Anesthetics	17	0.00605629	621	0.221233	2.06681e-07	.	.	x	x	3	607	14	2183	2807	0.00480769	0.972756	0.0224359	0.823529	0.0225443
acetaminophen	2-methoxyacetaminophen sulfate*	Drug - Analgesics, Anesthetics	17	0.00605629	411	0.14642	2.583e-07	.	.	x	x	5	399	12	2391	2807	0.0120192	0.959135	0.0288462	0.705882	0.0291971
acetaminophen	4-acetamidophenylglucuronide	Drug - Analgesics, Anesthetics	17	0.00605629	938	0.334165	2.59908e-07	.	.	x	x	1	922	16	1868	2807	0.00106496	0.981896	0.0170394	0.941176	0.0170576
sitagliptin	hydroxypioglitazone (M-IV)	Drug - Metabolic	37	0.0131813	23	0.0081938	2.95285e-07	.	.	.	.	31	17	6	2753	2807	0.574074	0.314815	0.111111	0.162162	0.26087
metformin	hydroxypioglitazone (M-IV)	Drug - Metabolic	220	0.0783755	23	0.0081938	3.13094e-07	.	.	.	.	209	12	11	2575	2807	0.900862	0.0517241	0.0474138	0.05	0.478261
metformin	valsartan	Drug - Cardiovascular	220	0.0783755	171	0.0609191	4.69242e-07	.	.	.	.	187	138	33	2449	2807	0.522346	0.385475	0.0921788	0.15	0.192982
metformin	ketopioglitazone	Drug - Metabolic	220	0.0783755	69	0.0245814	6.13539e-07	.	.	x	x	201	50	19	2537	2807	0.744444	0.185185	0.0703704	0.0863636	0.275362
acetylsalicylic acid	atorvastatin (lipitor)	Drug - Metabolic	111	0.039544	45	0.0160314	7.37434e-07	.	.	.	.	100	34	11	2662	2807	0.689655	0.234483	0.0758621	0.0990991	0.244444
repaglinide	repaglinide	Drug - Metabolic	2	0.000712504	3	0.00106876	7.61765e-07	x	x	x	x	0	1	2	2804	2807	0	0.333333	0.666667	1	0.666667
unspecified dyslipidemia	valsartan	Drug - Cardiovascular	143	0.0509441	171	0.0609191	7.84687e-07	.	.	.	.	118	146	25	2518	2807	0.408304	0.50519	0.0865052	0.174825	0.146199
losartan	hydroxypioglitazone (M-IV)	Drug - Metabolic	24	0.00855005	23	0.0081938	8.92415e-07	.	.	.	.	19	18	5	2765	2807	0.452381	0.428571	0.119048	0.208333	0.217391
acetaminophen	3-(N-acetyl-L-cystein-S-yl) acetaminophen	Drug - Analgesics, Anesthetics	17	0.00605629	370	0.131813	1.07085e-06	.	.	x	x	6	359	11	2431	2807	0.0159574	0.954787	0.0292553	0.647059	0.0297297
gliclazide	o-hydroxyatorvastatin	Drug - Metabolic	47	0.0167439	110	0.0391877	1.0793e-06	.	.	.	.	36	99	11	2661	2807	0.246575	0.678082	0.0753425	0.234043	0.1
cetirizine	cetirizine	Drug - Respiratory	7	0.00249377	102	0.0363377	1.14004e-06	x	x	x	x	2	97	5	2703	2807	0.0192308	0.932692	0.0480769	0.714286	0.0490196
sitagliptin	pioglitazone	Drug - Metabolic	37	0.0131813	30	0.0106876	1.62454e-06	.	.	.	.	31	24	6	2746	2807	0.508197	0.393443	0.0983607	0.162162	0.2
pioglitazone	ketopioglitazone	Drug - Metabolic	5	0.00178126	69	0.0245814	1.64351e-06	.	.	.	.	1	65	4	2737	2807	0.0142857	0.928571	0.0571429	0.8	0.057971
clopidogrel	o-hydroxyatorvastatin	Drug - Metabolic	17	0.00605629	110	0.0391877	1.6506e-06	.	x	.	x	10	103	7	2687	2807	0.0833333	0.858333	0.0583333	0.411765	0.0636364
rabeprazole	hydrochlorothiazide	Drug - Cardiovascular	33	0.0117563	53	0.0188814	1.67066e-06	.	x	.	x	26	46	7	2728	2807	0.329114	0.582278	0.0886076	0.212121	0.132075
clopidogrel	salicyluric glucuronide*	Drug - Analgesics, Anesthetics	17	0.00605629	1292	0.460278	1.76406e-06	.	.	.	.	0	1275	17	1515	2807	0	0.986842	0.0131579	1	0.0131579
sitagliptin	ketopioglitazone	Drug - Metabolic	37	0.0131813	69	0.0245814	1.9332e-06	.	.	.	.	29	61	8	2709	2807	0.295918	0.622449	0.0816327	0.216216	0.115942
quetiapine	quetiapine	Drug - Psychoactive	3	0.00106876	3	0.00106876	2.28475e-06	x	x	x	x	1	1	2	2803	2807	0.25	0.25	0.5	0.666667	0.666667
acetaminophen	4-acetaminophen sulfate	Drug - Analgesics, Anesthetics	17	0.00605629	1102	0.39259	3.20997e-06	.	.	x	x	1	1086	16	1704	2807	0.000906618	0.984587	0.0145059	0.941176	0.0145191
acetaminophen	3-(cystein-S-yl)acetaminophen*	Drug - Analgesics, Anesthetics	17	0.00605629	414	0.147488	3.39437e-06	.	.	x	x	6	403	11	2387	2807	0.0142857	0.959524	0.0261905	0.647059	0.02657
losartan	pioglitazone	Drug - Metabolic	24	0.00855005	30	0.0106876	3.63203e-06	.	.	.	.	19	25	5	2758	2807	0.387755	0.510204	0.102041	0.208333	0.166667
pantoprazole	dexlansoprazole	Drug - Gastrointestinal	12	0.00427503	28	0.00997506	3.71636e-06	.	.	x	x	8	24	4	2771	2807	0.222222	0.666667	0.111111	0.333333	0.142857
pregabalin	hydrochlorothiazide	Drug - Cardiovascular	7	0.00249377	53	0.0188814	3.80629e-06	.	.	.	.	3	49	4	2751	2807	0.0535714	0.875	0.0714286	0.571429	0.0754717
metoprolol	alpha-hydroxymetoprolol	Drug - Cardiovascular	3	0.00106876	45	0.0160314	3.85364e-06	x	x	x	x	0	42	3	2762	2807	0	0.933333	0.0666667	1	0.0666667
levetiracetam	levetiracetam	Drug - Neurological	4	0.00142501	126	0.0448878	3.87763e-06	x	x	x	x	0	122	4	2681	2807	0	0.968254	0.031746	1	0.031746
unspecified hypertension	sitagliptin	Drug - Metabolic	98	0.0349127	111	0.039544	4.10955e-06	.	.	.	.	83	96	15	2613	2807	0.427835	0.494845	0.0773196	0.153061	0.135135
acetylsalicylic acid	hydrochlorothiazide	Drug - Cardiovascular	111	0.039544	53	0.0188814	4.2385e-06	.	.	.	.	100	42	11	2654	2807	0.653595	0.27451	0.0718954	0.0990991	0.207547
enalapril	enalapril	Drug - Cardiovascular	8	0.00285002	13	0.00463128	4.29166e-06	x	x	x	x	5	10	3	2789	2807	0.277778	0.555556	0.166667	0.375	0.230769
glimepiride	metformin	Drug - Metabolic	18	0.00641254	846	0.301389	4.31544e-06	.	.	.	.	3	831	15	1958	2807	0.00353357	0.978799	0.0176678	0.833333	0.0177305
clopidogrel	atorvastatin (lipitor)	Drug - Metabolic	17	0.00605629	45	0.0160314	4.52583e-06	.	.	.	.	12	40	5	2750	2807	0.210526	0.701754	0.0877193	0.294118	0.111111
pioglitazone	Glimepiride	Drug - Metabolic	5	0.00178126	25	0.00890631	6.17291e-06	.	.	.	.	2	22	3	2780	2807	0.0740741	0.814815	0.111111	0.6	0.12
unspecified dyslipidemia	salicyluric glucuronide*	Drug - Analgesics, Anesthetics	143	0.0509441	1292	0.460278	9.15434e-06	.	.	.	.	51	1200	92	1464	2807	0.0379747	0.893522	0.0685034	0.643357	0.0712074
unspecified dyslipidemia	atorvastatin (lipitor)	Drug - Metabolic	143	0.0509441	45	0.0160314	9.30355e-06	.	.	.	.	132	34	11	2630	2807	0.745763	0.19209	0.0621469	0.0769231	0.244444
unspecified gastroesophageal reflux	omeprazole	Drug - Gastrointestinal	14	0.00498753	67	0.0238689	1.13026e-05	.	x	.	x	9	62	5	2731	2807	0.118421	0.815789	0.0657895	0.357143	0.0746269
lisinopril	o-hydroxyatorvastatin	Drug - Metabolic	15	0.00534378	110	0.0391877	1.18625e-05	.	x	.	x	9	104	6	2688	2807	0.0756303	0.87395	0.0504202	0.4	0.0545455
unspecified antidepressant	citalopram/escitalopram	Drug - Psychoactive	5	0.00178126	31	0.0110438	1.20251e-05	.	x	.	x	2	28	3	2774	2807	0.0606061	0.848485	0.0909091	0.6	0.0967742
atorvastatin	salicyluric glucuronide*	Drug - Analgesics, Anesthetics	90	0.0320627	1292	0.460278	1.252e-05	.	.	.	.	28	1230	62	1487	2807	0.0212121	0.931818	0.0469697	0.688889	0.0479876
unspecified antidepressant	citalopram propionate*	Drug - Psychoactive	5	0.00178126	34	0.0121126	1.59826e-05	.	.	.	.	2	31	3	2771	2807	0.0555556	0.861111	0.0833333	0.6	0.0882353
insulin aspart	hydrochlorothiazide	Drug - Cardiovascular	63	0.0224439	53	0.0188814	1.63876e-05	.	.	.	.	55	45	8	2699	2807	0.509259	0.416667	0.0740741	0.126984	0.150943
unspecified hypertension	atenolol	Drug - Cardiovascular	98	0.0349127	140	0.0498753	1.75097e-05	.	.	.	.	82	124	16	2585	2807	0.369369	0.558559	0.0720721	0.163265	0.114286
insulin aspart	pregabalin	Drug - Neurological	63	0.0224439	16	0.00570004	1.75245e-05	.	.	.	.	58	11	5	2733	2807	0.783784	0.148649	0.0675676	0.0793651	0.3125
unspecified prostate	o-hydroxyatorvastatin	Drug - Metabolic	10	0.00356252	110	0.0391877	1.81913e-05	.	x	.	x	5	105	5	2692	2807	0.0434783	0.913043	0.0434783	0.5	0.0454545
metformin	losartan	Drug - Cardiovascular	220	0.0783755	27	0.00961881	1.83751e-05	.	.	.	.	210	17	10	2570	2807	0.886076	0.07173	0.0421941	0.0454545	0.37037
bisoprolol	sitagliptin	Drug - Metabolic	16	0.00570004	111	0.039544	1.93672e-05	.	x	.	x	10	105	6	2686	2807	0.0826446	0.867769	0.0495868	0.375	0.0540541
clopidogrel	sitagliptin	Drug - Metabolic	17	0.00605629	111	0.039544	2.89733e-05	.	.	.	.	11	105	6	2685	2807	0.0901639	0.860656	0.0491803	0.352941	0.0540541
unspecified dyslipidemia	indapamide	Drug - Cardiovascular	143	0.0509441	34	0.0121126	3.16368e-05	.	.	.	.	134	25	9	2639	2807	0.797619	0.14881	0.0535714	0.0629371	0.264706
unspecified hypertension	metoprolol acid metabolite*	Drug - Cardiovascular	98	0.0349127	180	0.0641254	3.18803e-05	.	.	.	.	80	162	18	2547	2807	0.307692	0.623077	0.0692308	0.183673	0.1
clopidogrel	omeprazole	Drug - Gastrointestinal	17	0.00605629	67	0.0238689	3.30427e-05	.	.	.	.	12	62	5	2728	2807	0.151899	0.78481	0.0632911	0.294118	0.0746269
hydrochlorothiazide	Glimepiride	Drug - Metabolic	8	0.00285002	25	0.00890631	3.39619e-05	.	.	.	.	5	22	3	2777	2807	0.166667	0.733333	0.1	0.375	0.12
metformin	glyburide	Drug - Metabolic	220	0.0783755	4	0.00142501	3.6791e-05	.	.	x	x	216	0	4	2587	2807	0.981818	0	0.0181818	0.0181818	1
ranitidine	ranitidine	Drug - Gastrointestinal	14	0.00498753	42	0.0149626	3.89249e-05	x	x	x	x	10	38	4	2755	2807	0.192308	0.730769	0.0769231	0.285714	0.0952381
indapamide	perindopril	Drug - Cardiovascular	15	0.00534378	14	0.00498753	4.34148e-05	.	.	.	.	12	11	3	2781	2807	0.461538	0.423077	0.115385	0.2	0.214286
amlodipine	valsartan	Drug - Cardiovascular	30	0.0106876	171	0.0609191	4.40757e-05	.	x	.	x	21	162	9	2615	2807	0.109375	0.84375	0.046875	0.3	0.0526316
sitagliptin	hydrochlorothiazide	Drug - Cardiovascular	37	0.0131813	53	0.0188814	5.04054e-05	.	.	.	.	31	47	6	2723	2807	0.369048	0.559524	0.0714286	0.162162	0.113208
metformin	pioglitazone	Drug - Metabolic	220	0.0783755	30	0.0106876	5.30081e-05	.	.	.	.	210	20	10	2567	2807	0.875	0.0833333	0.0416667	0.0454545	0.333333
acetylsalicylic acid	metoprolol acid metabolite*	Drug - Cardiovascular	111	0.039544	180	0.0641254	5.33568e-05	.	.	.	.	92	161	19	2535	2807	0.338235	0.591912	0.0698529	0.171171	0.105556
unspecified diabetes	Glimepiride	Drug - Metabolic	50	0.0178126	25	0.00890631	5.94306e-05	.	.	.	.	45	20	5	2737	2807	0.642857	0.285714	0.0714286	0.1	0.2
salmeterol	1-hydroxy-2-naphthalenecarboxylate	Drug - Other	5	0.00178126	403	0.14357	5.97096e-05	x	x	x	x	0	398	5	2404	2807	0	0.987593	0.0124069	1	0.0124069
isosorbide dinitrate	sitagliptin	Drug - Metabolic	3	0.00106876	111	0.039544	6.02392e-05	.	x	.	x	0	108	3	2696	2807	0	0.972973	0.027027	1	0.027027
atenolol	enalapril	Drug - Cardiovascular	18	0.00641254	13	0.00463128	6.08813e-05	.	.	.	.	15	10	3	2779	2807	0.535714	0.357143	0.107143	0.166667	0.230769
fluoxetine	fluoxetine	Drug - Psychoactive	3	0.00106876	14	0.00498753	6.91229e-05	x	x	x	x	1	12	2	2792	2807	0.0666667	0.8	0.133333	0.666667	0.142857
insulin aspart	indapamide	Drug - Cardiovascular	63	0.0224439	34	0.0121126	8.2658e-05	.	.	.	.	57	28	6	2716	2807	0.626374	0.307692	0.0659341	0.0952381	0.176471
acetylsalicylic acid	valsartan	Drug - Cardiovascular	111	0.039544	171	0.0609191	8.95203e-05	.	.	.	.	93	153	18	2543	2807	0.352273	0.579545	0.0681818	0.162162	0.105263
fluoxetine	norfluoxetine	Drug - Psychoactive	3	0.00106876	16	0.00570004	9.11077e-05	.	.	x	x	1	14	2	2790	2807	0.0588235	0.823529	0.117647	0.666667	0.125
bisoprolol	atorvastatin (lipitor)	Drug - Metabolic	16	0.00570004	45	0.0160314	9.12302e-05	.	.	.	.	12	41	4	2750	2807	0.210526	0.719298	0.0701754	0.25	0.0888889
atorvastatin	pregabalin	Drug - Neurological	90	0.0320627	16	0.00570004	0.000100164	.	.	.	.	85	11	5	2706	2807	0.841584	0.108911	0.049505	0.0555556	0.3125
unspecified hypertension	salicyluric glucuronide*	Drug - Analgesics, Anesthetics	98	0.0349127	1292	0.460278	0.000115941	.	.	.	.	34	1228	64	1481	2807	0.025641	0.926094	0.0482655	0.653061	0.0495356
metformin	ibuprofen	Drug - Analgesics, Anesthetics	220	0.0783755	793	0.282508	0.000121308	.	.	x	x	182	755	38	1832	2807	0.186667	0.774359	0.0389744	0.172727	0.0479193
unspecified hypertension	atorvastatin (lipitor)	Drug - Metabolic	98	0.0349127	45	0.0160314	0.000122758	.	.	.	.	90	37	8	2672	2807	0.666667	0.274074	0.0592593	0.0816327	0.177778
unspecified gastroesophageal reflux	midazolam	Drug - Psychoactive	14	0.00498753	4	0.00142501	0.000137852	.	.	x	x	12	2	2	2791	2807	0.75	0.125	0.125	0.142857	0.5
rabeprazole	atorvastatin (lipitor)	Drug - Metabolic	33	0.0117563	45	0.0160314	0.000143362	.	.	.	.	28	40	5	2734	2807	0.383562	0.547945	0.0684932	0.151515	0.111111
unspecified prostate	metformin	Drug - Metabolic	10	0.00356252	846	0.301389	0.000145535	.	.	.	.	1	837	9	1960	2807	0.00118064	0.988194	0.0106257	0.9	0.0106383
rosuvastatin	metformin	Drug - Metabolic	65	0.0231564	846	0.301389	0.000174333	.	.	.	.	31	812	34	1930	2807	0.0353478	0.925884	0.0387685	0.523077	0.0401891
allopurinol	oxypurinol	Drug - Metabolic	7	0.00249377	282	0.100463	0.000175279	x	x	x	x	2	277	5	2523	2807	0.00704225	0.975352	0.0176056	0.714286	0.0177305
rosuvastatin	sitagliptin	Drug - Metabolic	65	0.0231564	111	0.039544	0.00017857	.	.	.	.	55	101	10	2641	2807	0.331325	0.608434	0.060241	0.153846	0.0900901
meloxicam	meloxicam	Drug - Analgesics, Anesthetics	3	0.00106876	163	0.0580691	0.000192427	x	x	x	x	0	160	3	2644	2807	0	0.981595	0.0184049	1	0.0184049
acetylsalicylic acid	hydroxypioglitazone (M-IV)	Drug - Metabolic	111	0.039544	23	0.0081938	0.000194489	.	.	.	.	105	17	6	2679	2807	0.820312	0.132812	0.046875	0.0540541	0.26087
amlodipine	hydrochlorothiazide	Drug - Cardiovascular	30	0.0106876	53	0.0188814	0.00019738	.	.	.	.	25	48	5	2729	2807	0.320513	0.615385	0.0641026	0.166667	0.0943396
rabeprazole	o-hydroxyatorvastatin	Drug - Metabolic	33	0.0117563	110	0.0391877	0.000215307	.	.	.	.	26	103	7	2671	2807	0.191176	0.757353	0.0514706	0.212121	0.0636364
losartan	ketopioglitazone	Drug - Metabolic	24	0.00855005	69	0.0245814	0.000229332	.	.	.	.	19	64	5	2719	2807	0.215909	0.727273	0.0568182	0.208333	0.0724638
losartan	sitagliptin	Drug - Metabolic	24	0.00855005	111	0.039544	0.000251046	.	.	.	.	18	105	6	2678	2807	0.139535	0.813953	0.0465116	0.25	0.0540541
repaglinide	atorvastatin (lipitor)	Drug - Metabolic	2	0.000712504	45	0.0160314	0.000251382	.	.	.	.	0	43	2	2762	2807	0	0.955556	0.0444444	1	0.0444444
metoprolol	metoprolol acid metabolite*	Drug - Cardiovascular	3	0.00106876	180	0.0641254	0.000259587	.	.	.	.	0	177	3	2627	2807	0	0.983333	0.0166667	1	0.0166667
unspecified prostate	Gliclazide	Drug - Metabolic	10	0.00356252	468	0.166726	0.000259853	.	.	.	.	3	461	7	2336	2807	0.00636943	0.978769	0.014862	0.7	0.0149573
sitagliptin	Glimepiride	Drug - Metabolic	37	0.0131813	25	0.00890631	0.000265392	.	.	.	.	33	21	4	2749	2807	0.568966	0.362069	0.0689655	0.108108	0.16
amitriptyline	losartan	Drug - Cardiovascular	3	0.00106876	27	0.00961881	0.000265791	.	x	.	x	1	25	2	2779	2807	0.0357143	0.892857	0.0714286	0.666667	0.0740741
omeprazole	4-acetaminophen sulfate	Drug - Analgesics, Anesthetics	27	0.00961881	1102	0.39259	0.000266672	.	.	.	.	7	1082	20	1698	2807	0.00631199	0.975654	0.0180343	0.740741	0.0181488
pregabalin	celecoxib	Drug - Analgesics, Anesthetics	7	0.00249377	58	0.0206626	0.000276426	.	.	.	.	4	55	3	2745	2807	0.0645161	0.887097	0.0483871	0.428571	0.0517241
unspecified dyslipidemia	losartan	Drug - Cardiovascular	143	0.0509441	27	0.00961881	0.000289011	.	.	.	.	136	20	7	2644	2807	0.834356	0.122699	0.0429448	0.048951	0.259259
acetylsalicylic acid	atenolol	Drug - Cardiovascular	111	0.039544	140	0.0498753	0.000302943	.	.	.	.	96	125	15	2571	2807	0.40678	0.529661	0.0635593	0.135135	0.107143
acetylsalicylic acid	Glimepiride	Drug - Metabolic	111	0.039544	25	0.00890631	0.000319792	.	.	.	.	105	19	6	2677	2807	0.807692	0.146154	0.0461538	0.0540541	0.24
calcium	hydrochlorothiazide	Drug - Cardiovascular	95	0.033844	53	0.0188814	0.000323232	.	x	.	x	87	45	8	2667	2807	0.621429	0.321429	0.0571429	0.0842105	0.150943
simvastatin	ezetimibe glucuronide*	Drug - Metabolic	9	0.00320627	9	0.00320627	0.000325269	x	x	x	x	7	7	2	2791	2807	0.4375	0.4375	0.125	0.222222	0.222222
nifedipine	hydrochlorothiazide	Drug - Cardiovascular	2	0.000712504	53	0.0188814	0.000349904	.	x	.	x	0	51	2	2754	2807	0	0.962264	0.0377358	1	0.0377358
carbamazepine	carbamazepine 10,11-epoxide*	Drug - Neurological	1	0.000356252	1	0.000356252	0.000356252	x	x	x	x	0	0	1	2806	2807	0	0	1	1	1
sitagliptin	losartan	Drug - Cardiovascular	37	0.0131813	27	0.00961881	0.000361306	.	.	.	.	33	23	4	2747	2807	0.55	0.383333	0.0666667	0.108108	0.148148
glimepiride	hydroxypioglitazone (M-IV)	Drug - Metabolic	18	0.00641254	23	0.0081938	0.000362138	.	.	.	.	15	20	3	2769	2807	0.394737	0.526316	0.0789474	0.166667	0.130435
vitamin d	o-hydroxyatorvastatin	Drug - Metabolic	510	0.181689	110	0.0391877	0.000367905	.	x	.	x	475	75	35	2222	2807	0.811966	0.128205	0.0598291	0.0686275	0.318182
fluticasone	fexofenadine	Drug - Respiratory	2	0.000712504	57	0.0203064	0.000405259	.	x	.	x	0	55	2	2750	2807	0	0.964912	0.0350877	1	0.0350877
multivitamin	ibuprofen	Drug - Analgesics, Anesthetics	276	0.0983256	793	0.282508	0.00041031	.	x	.	x	172	689	104	1842	2807	0.178238	0.71399	0.107772	0.376812	0.131148
insulin aspart	salicyluric glucuronide*	Drug - Analgesics, Anesthetics	63	0.0224439	1292	0.460278	0.000463121	.	.	.	.	20	1249	43	1495	2807	0.0152439	0.951982	0.0327744	0.68254	0.0332817
glimepiride	o-hydroxyatorvastatin	Drug - Metabolic	18	0.00641254	110	0.0391877	0.000480544	.	.	.	.	13	105	5	2684	2807	0.105691	0.853659	0.0406504	0.277778	0.0454545
unspecified dyslipidemia	Gliclazide	Drug - Metabolic	143	0.0509441	468	0.166726	0.000483281	.	.	.	.	103	428	40	2236	2807	0.180385	0.749562	0.0700525	0.27972	0.0854701
rosuvastatin	tadalafil	Drug - Cardiovascular	65	0.0231564	82	0.0292127	0.000490237	.	.	x	x	57	74	8	2668	2807	0.410072	0.532374	0.057554	0.123077	0.097561
fexofenadine	1-hydroxy-2-naphthalenecarboxylate	Drug - Other	12	0.00427503	403	0.14357	0.000493197	.	.	.	.	5	396	7	2399	2807	0.0122549	0.970588	0.0171569	0.583333	0.0173697
atorvastatin	Gliclazide	Drug - Metabolic	90	0.0320627	468	0.166726	0.000496301	.	.	.	.	62	440	28	2277	2807	0.116981	0.830189	0.0528302	0.311111	0.0598291
acetylsalicylic acid	losartan	Drug - Cardiovascular	111	0.039544	27	0.00961881	0.000500992	.	.	.	.	105	21	6	2675	2807	0.795455	0.159091	0.0454545	0.0540541	0.222222
metformin	omeprazole	Drug - Gastrointestinal	220	0.0783755	67	0.0238689	0.000501974	.	.	.	.	206	53	14	2534	2807	0.754579	0.194139	0.0512821	0.0636364	0.208955
unspecified antidepressant	desmethylcitalopram*	Drug - Psychoactive	5	0.00178126	21	0.0074813	0.000526047	.	.	.	.	3	19	2	2783	2807	0.125	0.791667	0.0833333	0.4	0.0952381
fluvastatin	omeprazole	Drug - Gastrointestinal	2	0.000712504	67	0.0238689	0.000561421	.	x	.	x	0	65	2	2740	2807	0	0.970149	0.0298507	1	0.0298507
unspecified diabetes	o-hydroxyatorvastatin	Drug - Metabolic	50	0.0178126	110	0.0391877	0.000585272	.	.	.	.	42	102	8	2655	2807	0.276316	0.671053	0.0526316	0.16	0.0727273
acetylsalicylic acid	Gliclazide	Drug - Metabolic	111	0.039544	468	0.166726	0.000601833	.	.	.	.	78	435	33	2261	2807	0.142857	0.796703	0.0604396	0.297297	0.0705128
clopidogrel	metformin	Drug - Metabolic	17	0.00605629	846	0.301389	0.000662273	.	.	.	.	5	834	12	1956	2807	0.00587544	0.980024	0.0141011	0.705882	0.0141844
collagen	furosemide	Drug - Cardiovascular	3	0.00106876	43	0.0153188	0.000681171	x	x	x	x	1	41	2	2763	2807	0.0227273	0.931818	0.0454545	0.666667	0.0465116
rivaroxaban	rivaroxaban	Drug - Cardiovascular	1	0.000356252	2	0.000712504	0.000712505	x	x	x	x	0	1	1	2805	2807	0	0.5	0.5	1	0.5
venlafaxine	N,O-didesmethylvenlafaxine glucuronide	Drug - Psychoactive	1	0.000356252	2	0.000712504	0.000712505	.	.	x	x	0	1	1	2805	2807	0	0.5	0.5	1	0.5
venlafaxine	O-desmethylvenlafaxine	Drug - Psychoactive	1	0.000356252	2	0.000712504	0.000712505	.	.	x	x	0	1	1	2805	2807	0	0.5	0.5	1	0.5
venlafaxine	venlafaxine	Drug - Psychoactive	1	0.000356252	2	0.000712504	0.000712505	x	x	x	x	0	1	1	2805	2807	0	0.5	0.5	1	0.5
citalopram	imipramine	Drug - Psychoactive	2	0.000712504	1	0.000356252	0.000712505	x	x	x	x	1	0	1	2805	2807	0.5	0	0.5	0.5	1
valsartan	o-hydroxyatorvastatin	Drug - Metabolic	40	0.0142501	110	0.0391877	0.000748643	.	.	.	.	33	103	7	2664	2807	0.230769	0.72028	0.048951	0.175	0.0636364
ginseng	Glimepiride	Drug - Metabolic	5	0.00178126	25	0.00890631	0.000749346	.	x	.	x	3	23	2	2779	2807	0.107143	0.821429	0.0714286	0.4	0.08
acetylsalicylic acid	ibuprofen	Drug - Analgesics, Anesthetics	111	0.039544	793	0.282508	0.000763573	.	.	.	.	95	777	16	1919	2807	0.106982	0.875	0.018018	0.144144	0.0201765
perindopril	alpha-hydroxymetoprolol	Drug - Cardiovascular	12	0.00427503	45	0.0160314	0.000765985	.	.	.	.	9	42	3	2753	2807	0.166667	0.777778	0.0555556	0.25	0.0666667
vitamin d	hydroquinone sulfate	Drug - Topical Agents	510	0.181689	2119	0.754898	0.000782223	.	.	x	x	155	1764	355	533	2807	0.0681618	0.775726	0.156113	0.696078	0.167532
unspecified osteoarthritis	diclofenac	Drug - Analgesics, Anesthetics	2	0.000712504	79	0.0281439	0.000782333	x	x	x	x	0	77	2	2728	2807	0	0.974684	0.0253165	1	0.0253165
gliclazide	atorvastatin (lipitor)	Drug - Metabolic	47	0.0167439	45	0.0160314	0.00078391	.	.	.	.	42	40	5	2720	2807	0.482759	0.45977	0.0574713	0.106383	0.111111
unspecified diabetes	Gliclazide	Drug - Metabolic	50	0.0178126	468	0.166726	0.000788383	.	.	.	.	32	450	18	2307	2807	0.064	0.9	0.036	0.36	0.0384615
glimepiride	ketopioglitazone	Drug - Metabolic	18	0.00641254	69	0.0245814	0.000789191	.	.	.	.	14	65	4	2724	2807	0.168675	0.783133	0.0481928	0.222222	0.057971
glimepiride	pioglitazone	Drug - Metabolic	18	0.00641254	30	0.0106876	0.000807153	.	.	.	.	15	27	3	2762	2807	0.333333	0.6	0.0666667	0.166667	0.1
unspecified diabetes	salicyluric glucuronide*	Drug - Analgesics, Anesthetics	50	0.0178126	1292	0.460278	0.000816126	.	.	.	.	15	1257	35	1500	2807	0.0114767	0.961744	0.0267789	0.7	0.0270898
somatotropin	tadalafil	Drug - Cardiovascular	2	0.000712504	82	0.0292127	0.000843274	.	x	.	x	0	80	2	2725	2807	0	0.97561	0.0243902	1	0.0243902
metformin	indapamide	Drug - Cardiovascular	220	0.0783755	34	0.0121126	0.000875978	.	.	.	.	211	25	9	2562	2807	0.861224	0.102041	0.0367347	0.0409091	0.264706
amlodipine	sitagliptin	Drug - Metabolic	30	0.0106876	111	0.039544	0.000912037	.	.	.	.	24	105	6	2672	2807	0.177778	0.777778	0.0444444	0.2	0.0540541
acetylsalicylic acid	pioglitazone	Drug - Metabolic	111	0.039544	30	0.0106876	0.000912037	.	.	.	.	105	24	6	2672	2807	0.777778	0.177778	0.0444444	0.0540541	0.2
enalapril	metoprolol acid metabolite*	Drug - Cardiovascular	8	0.00285002	180	0.0641254	0.000933925	.	.	.	.	4	176	4	2623	2807	0.0217391	0.956522	0.0217391	0.5	0.0222222
atorvastatin	Glimepiride	Drug - Metabolic	90	0.0320627	25	0.00890631	0.000969188	.	.	.	.	85	20	5	2697	2807	0.772727	0.181818	0.0454545	0.0555556	0.2
fluticasone	pantoprazole	Drug - Gastrointestinal	2	0.000712504	88	0.0313502	0.000972013	.	.	.	.	0	86	2	2719	2807	0	0.977273	0.0227273	1	0.0227273
unspecified heart	salicyluric glucuronide*	Drug - Analgesics, Anesthetics	13	0.00463128	1292	0.460278	0.000982003	.	x	.	x	1	1280	12	1514	2807	0.000773395	0.989946	0.00928074	0.923077	0.00928793
vitamin d	1-hydroxy-2-naphthalenecarboxylate	Drug - Other	510	0.181689	403	0.14357	0.00100116	.	.	.	.	460	353	50	1944	2807	0.533024	0.409038	0.0579374	0.0980392	0.124069
multivitamin	hydroxypioglitazone (M-IV)	Drug - Metabolic	276	0.0983256	23	0.0081938	0.00103792	.	.	.	.	268	15	8	2516	2807	0.920962	0.0515464	0.0274914	0.0289855	0.347826
buspirone	quetiapine	Drug - Psychoactive	1	0.000356252	3	0.00106876	0.00106876	.	x	.	x	0	2	1	2804	2807	0	0.666667	0.333333	1	0.333333
carbamazepine	carbamazepine glucuronide*	Drug - Neurological	1	0.000356252	3	0.00106876	0.00106876	.	.	x	x	0	2	1	2804	2807	0	0.666667	0.333333	1	0.333333
sulfasalazine	N-acetyl sulfapyridine	Drug - Antibiotic	1	0.000356252	3	0.00106876	0.00106876	x	x	x	x	0	2	1	2804	2807	0	0.666667	0.333333	1	0.333333
unspecified immunosuppressant	nifedipine	Drug - Cardiovascular	1	0.000356252	3	0.00106876	0.00106876	x	x	x	x	0	2	1	2804	2807	0	0.666667	0.333333	1	0.333333
simvastatin	ketopioglitazone	Drug - Metabolic	9	0.00320627	69	0.0245814	0.00107435	.	.	.	.	6	66	3	2732	2807	0.08	0.88	0.04	0.333333	0.0434783
ranitidine	atorvastatin (lipitor)	Drug - Metabolic	14	0.00498753	45	0.0160314	0.00123917	.	.	.	.	11	42	3	2751	2807	0.196429	0.75	0.0535714	0.214286	0.0666667
metformin	1-hydroxy-2-naphthalenecarboxylate	Drug - Other	220	0.0783755	403	0.14357	0.00124845	.	.	.	.	204	387	16	2200	2807	0.336079	0.637562	0.0263591	0.0727273	0.0397022
unspecified hypertension	ibuprofen	Drug - Analgesics, Anesthetics	98	0.0349127	793	0.282508	0.00127702	.	.	.	.	84	779	14	1930	2807	0.0957811	0.888255	0.0159635	0.142857	0.0176545
sitagliptin	salicyluric glucuronide*	Drug - Analgesics, Anesthetics	37	0.0131813	1292	0.460278	0.00128031	.	.	.	.	10	1265	27	1505	2807	0.00768049	0.971582	0.0207373	0.72973	0.0208978
acetylsalicylic acid	ketopioglitazone	Drug - Metabolic	111	0.039544	69	0.0245814	0.00131978	.	.	.	.	102	60	9	2636	2807	0.596491	0.350877	0.0526316	0.0810811	0.130435
atorvastatin	ketopioglitazone	Drug - Metabolic	90	0.0320627	69	0.0245814	0.00137306	.	.	.	.	82	61	8	2656	2807	0.543046	0.403974	0.0529801	0.0888889	0.115942
orlistat	4-acetamidophenylglucuronide	Drug - Analgesics, Anesthetics	6	0.00213751	938	0.334165	0.00137761	.	x	.	x	0	932	6	1869	2807	0	0.993603	0.00639659	1	0.00639659
metformin	tadalafil	Drug - Cardiovascular	220	0.0783755	82	0.0292127	0.00138663	.	.	.	.	205	67	15	2520	2807	0.714286	0.233449	0.0522648	0.0681818	0.182927
alfuzosin	mirtazapine	Drug - Psychoactive	2	0.000712504	2	0.000712504	0.00142475	x	x	x	x	1	1	1	2804	2807	0.333333	0.333333	0.333333	0.5	0.5
propranolol	olmesartan	Drug - Cardiovascular	2	0.000712504	2	0.000712504	0.00142475	x	x	x	x	1	1	1	2804	2807	0.333333	0.333333	0.333333	0.5	0.5
formoterol	moxifloxacin	Drug - Antibiotic	1	0.000356252	4	0.00142501	0.00142501	x	x	x	x	0	3	1	2803	2807	0	0.75	0.25	1	0.25
glyburide	glyburide	Drug - Metabolic	1	0.000356252	4	0.00142501	0.00142501	.	x	.	x	0	3	1	2803	2807	0	0.75	0.25	1	0.25
losartan	salicyluric glucuronide*	Drug - Analgesics, Anesthetics	24	0.00855005	1292	0.460278	0.00145043	.	.	.	.	5	1273	19	1510	2807	0.00385505	0.981496	0.0146492	0.791667	0.0147059
rosuvastatin	salicyluric glucuronide*	Drug - Analgesics, Anesthetics	65	0.0231564	1292	0.460278	0.00145296	.	.	.	.	22	1249	43	1493	2807	0.0167428	0.950533	0.0327245	0.661538	0.0332817
insulin aspart	repaglinide	Drug - Metabolic	63	0.0224439	3	0.00106876	0.00146616	.	.	.	.	61	1	2	2743	2807	0.953125	0.015625	0.03125	0.031746	0.666667
repaglinide	o-hydroxyatorvastatin	Drug - Metabolic	2	0.000712504	110	0.0391877	0.00152226	.	.	.	.	0	108	2	2697	2807	0	0.981818	0.0181818	1	0.0181818
gliclazide	ibuprofen	Drug - Analgesics, Anesthetics	47	0.0167439	793	0.282508	0.00156793	.	.	.	.	43	789	4	1971	2807	0.0514354	0.94378	0.00478469	0.0851064	0.00504414
calcium	omeprazole	Drug - Gastrointestinal	95	0.033844	67	0.0238689	0.0016099	.	.	.	.	87	59	8	2653	2807	0.564935	0.383117	0.0519481	0.0842105	0.119403
gliclazide	sildenafil	Drug - Cardiovascular	47	0.0167439	4	0.00142501	0.00161192	.	.	x	x	45	2	2	2758	2807	0.918367	0.0408163	0.0408163	0.0425532	0.5
insulin aspart	celecoxib	Drug - Analgesics, Anesthetics	63	0.0224439	58	0.0206626	0.00163325	.	.	.	.	57	52	6	2692	2807	0.495652	0.452174	0.0521739	0.0952381	0.103448
ibuprofen	2-hydroxyibuprofen	Drug - Analgesics, Anesthetics	2	0.000712504	114	0.0406128	0.00163551	x	x	x	x	0	112	2	2693	2807	0	0.982456	0.0175439	1	0.0175439
clobetasol propionate	naproxen	Drug - Analgesics, Anesthetics	3	0.00106876	68	0.0242252	0.00170808	x	x	x	x	1	66	2	2738	2807	0.0144928	0.956522	0.0289855	0.666667	0.0294118
hydrochlorothiazide	hydroxypioglitazone (M-IV)	Drug - Metabolic	8	0.00285002	23	0.0081938	0.00174563	.	.	.	.	6	21	2	2778	2807	0.206897	0.724138	0.0689655	0.25	0.0869565
unspecified antidepressant	hydroxybupropion	Drug - Psychoactive	5	0.00178126	1	0.000356252	0.00178126	.	.	x	x	4	0	1	2802	2807	0.8	0	0.2	0.2	1
unspecified diabetes	4-hydroxy duloxetine glucuronide*	Drug - Psychoactive	50	0.0178126	4	0.00142501	0.00182401	.	.	x	x	48	2	2	2755	2807	0.923077	0.0384615	0.0384615	0.04	0.5
unspecified diabetes	5-hydroxy-6-methoxy duloxetine sulfate*	Drug - Psychoactive	50	0.0178126	4	0.00142501	0.00182401	.	.	x	x	48	2	2	2755	2807	0.923077	0.0384615	0.0384615	0.04	0.5
pregabalin	o-hydroxyatorvastatin	Drug - Metabolic	7	0.00249377	110	0.0391877	0.00182698	.	.	.	.	4	107	3	2693	2807	0.0350877	0.938596	0.0263158	0.428571	0.0272727
omeprazole	losartan	Drug - Cardiovascular	27	0.00961881	27	0.00961881	0.00199129	.	.	.	.	24	24	3	2756	2807	0.470588	0.470588	0.0588235	0.111111	0.111111
adalimumab	nifedipine	Drug - Cardiovascular	2	0.000712504	3	0.00106876	0.00213675	.	x	.	x	1	2	1	2803	2807	0.25	0.5	0.25	0.5	0.333333
nifedipine	carbamazepine glucuronide*	Drug - Neurological	2	0.000712504	3	0.00106876	0.00213675	.	.	.	.	1	2	1	2803	2807	0.25	0.5	0.25	0.5	0.333333
nifedipine	nifedipine	Drug - Cardiovascular	2	0.000712504	3	0.00106876	0.00213675	.	.	.	.	1	2	1	2803	2807	0.25	0.5	0.25	0.5	0.333333
mycophenolate mofetil	mycophenolic acid glucuronide	Drug - Antiinflammatory, Immunosuppressant	1	0.000356252	6	0.00213751	0.00213751	x	x	x	x	0	5	1	2801	2807	0	0.833333	0.166667	1	0.166667
tamoxifen	tamoxifen	Drug - Antineoplastic	1	0.000356252	6	0.00213751	0.00213751	x	x	x	x	0	5	1	2801	2807	0	0.833333	0.166667	1	0.166667
unspecified immunosuppressant	mycophenolic acid glucuronide	Drug - Antiinflammatory, Immunosuppressant	1	0.000356252	6	0.00213751	0.00213751	.	.	.	.	0	5	1	2801	2807	0	0.833333	0.166667	1	0.166667
unspecified kidney	mycophenolic acid glucuronide	Drug - Antiinflammatory, Immunosuppressant	1	0.000356252	6	0.00213751	0.00213751	.	x	.	x	0	5	1	2801	2807	0	0.833333	0.166667	1	0.166667
unspecified dyslipidemia	atenolol	Drug - Cardiovascular	143	0.0509441	140	0.0498753	0.00215417	.	.	.	.	127	124	16	2540	2807	0.475655	0.464419	0.0599251	0.111888	0.114286
metformin	10-hydroxywarfarin	Drug - Cardiovascular	220	0.0783755	13	0.00463128	0.0021577	.	.	.	.	215	8	5	2579	2807	0.942982	0.0350877	0.0219298	0.0227273	0.384615
metformin	6-hydroxywarfarin	Drug - Cardiovascular	220	0.0783755	13	0.00463128	0.0021577	.	.	.	.	215	8	5	2579	2807	0.942982	0.0350877	0.0219298	0.0227273	0.384615
unspecified diabetes	hydrochlorothiazide	Drug - Cardiovascular	50	0.0178126	53	0.0188814	0.00220427	.	.	.	.	45	48	5	2709	2807	0.459184	0.489796	0.0510204	0.1	0.0943396
desloratadine	montelukast	Drug - Respiratory	8	0.00285002	26	0.00926256	0.00223281	.	x	.	x	6	24	2	2775	2807	0.1875	0.75	0.0625	0.25	0.0769231
clopidogrel	alpha-hydroxymetoprolol	Drug - Cardiovascular	17	0.00605629	45	0.0160314	0.00223824	.	.	.	.	14	42	3	2748	2807	0.237288	0.711864	0.0508475	0.176471	0.0666667
atorvastatin	pioglitazone	Drug - Metabolic	90	0.0320627	30	0.0106876	0.00229038	.	.	.	.	85	25	5	2692	2807	0.73913	0.217391	0.0434783	0.0555556	0.166667
bisoprolol	10-hydroxywarfarin	Drug - Cardiovascular	16	0.00570004	13	0.00463128	0.00229121	.	.	.	.	14	11	2	2780	2807	0.518519	0.407407	0.0740741	0.125	0.153846
bisoprolol	6-hydroxywarfarin	Drug - Cardiovascular	16	0.00570004	13	0.00463128	0.00229121	.	.	.	.	14	11	2	2780	2807	0.518519	0.407407	0.0740741	0.125	0.153846
amlodipine	montelukast	Drug - Respiratory	30	0.0106876	26	0.00926256	0.00242748	.	.	.	.	27	23	3	2754	2807	0.509434	0.433962	0.0566038	0.1	0.115385
unspecified thyroid	celecoxib	Drug - Analgesics, Anesthetics	4	0.00142501	58	0.0206626	0.00245185	.	x	.	x	2	56	2	2747	2807	0.0333333	0.933333	0.0333333	0.5	0.0344828
lisinopril	hydrochlorothiazide	Drug - Cardiovascular	15	0.00534378	53	0.0188814	0.0024642	.	.	.	.	12	50	3	2742	2807	0.184615	0.769231	0.0461538	0.2	0.0566038
sodium chloride	atenolol	Drug - Cardiovascular	2	0.000712504	140	0.0498753	0.00247066	.	x	.	x	0	138	2	2667	2807	0	0.985714	0.0142857	1	0.0142857
sitagliptin	atorvastatin (lipitor)	Drug - Metabolic	37	0.0131813	45	0.0160314	0.00258865	.	.	.	.	33	41	4	2729	2807	0.423077	0.525641	0.0512821	0.108108	0.0888889
unspecified diabetes	valsartan	Drug - Cardiovascular	50	0.0178126	171	0.0609191	0.00267551	.	.	.	.	41	162	9	2595	2807	0.193396	0.764151	0.0424528	0.18	0.0526316
calcium	diphenhydramine	Drug - Respiratory	95	0.033844	57	0.0203064	0.00269638	.	.	x	x	88	50	7	2662	2807	0.606897	0.344828	0.0482759	0.0736842	0.122807
omeprazole	pioglitazone	Drug - Metabolic	27	0.00961881	30	0.0106876	0.00271129	.	.	.	.	24	27	3	2753	2807	0.444444	0.5	0.0555556	0.111111	0.1
amlodipine	losartan	Drug - Cardiovascular	30	0.0106876	27	0.00961881	0.00271129	.	.	.	.	27	24	3	2753	2807	0.5	0.444444	0.0555556	0.1	0.111111
unspecified diabetes	indapamide	Drug - Cardiovascular	50	0.0178126	34	0.0121126	0.00278788	.	.	.	.	46	30	4	2727	2807	0.575	0.375	0.05	0.08	0.117647
gliclazide	salicyluric glucuronide*	Drug - Analgesics, Anesthetics	47	0.0167439	1292	0.460278	0.00281459	.	.	.	.	15	1260	32	1500	2807	0.0114767	0.96404	0.0244836	0.680851	0.0247678
bisoprolol	o-hydroxyatorvastatin	Drug - Metabolic	16	0.00570004	110	0.0391877	0.00282154	.	.	.	.	12	106	4	2685	2807	0.0983607	0.868852	0.0327869	0.25	0.0363636
budesonide	moxifloxacin	Drug - Antibiotic	2	0.000712504	4	0.00142501	0.00284849	.	x	.	x	1	3	1	2802	2807	0.2	0.6	0.2	0.5	0.25
diosmin	moxifloxacin	Drug - Antibiotic	2	0.000712504	4	0.00142501	0.00284849	.	x	.	x	1	3	1	2802	2807	0.2	0.6	0.2	0.5	0.25
fluvastatin	glyburide	Drug - Metabolic	2	0.000712504	4	0.00142501	0.00284849	.	.	.	.	1	3	1	2802	2807	0.2	0.6	0.2	0.5	0.25
mometasone furoate	moxifloxacin	Drug - Antibiotic	2	0.000712504	4	0.00142501	0.00284849	.	x	.	x	1	3	1	2802	2807	0.2	0.6	0.2	0.5	0.25
mycophenolate mofetil	mycophenolic acid	Drug - Antiinflammatory, Immunosuppressant	1	0.000356252	8	0.00285002	0.00285002	.	.	x	x	0	7	1	2799	2807	0	0.875	0.125	1	0.125
unspecified immunosuppressant	mycophenolic acid	Drug - Antiinflammatory, Immunosuppressant	1	0.000356252	8	0.00285002	0.00285002	.	.	.	.	0	7	1	2799	2807	0	0.875	0.125	1	0.125
unspecified kidney	mycophenolic acid	Drug - Antiinflammatory, Immunosuppressant	1	0.000356252	8	0.00285002	0.00285002	.	.	.	.	0	7	1	2799	2807	0	0.875	0.125	1	0.125
enalapril	sitagliptin	Drug - Metabolic	8	0.00285002	111	0.039544	0.00291499	.	.	.	.	5	108	3	2691	2807	0.0431034	0.931034	0.0258621	0.375	0.027027
acetylsalicylic acid	pregabalin	Drug - Neurological	111	0.039544	16	0.00570004	0.00291684	.	.	.	.	107	12	4	2684	2807	0.869919	0.097561	0.0325203	0.036036	0.25
hydrochlorothiazide	pioglitazone	Drug - Metabolic	8	0.00285002	30	0.0106876	0.00297148	.	.	.	.	6	28	2	2771	2807	0.166667	0.777778	0.0555556	0.25	0.0666667
unspecified heart	atenolol	Drug - Cardiovascular	13	0.00463128	140	0.0498753	0.00297968	.	.	.	.	9	136	4	2658	2807	0.0604027	0.912752	0.0268456	0.307692	0.0285714
calcium	celecoxib	Drug - Analgesics, Anesthetics	95	0.033844	58	0.0206626	0.00298301	.	.	.	.	88	51	7	2661	2807	0.60274	0.349315	0.0479452	0.0736842	0.12069
unspecified dyslipidemia	ibuprofen	Drug - Analgesics, Anesthetics	143	0.0509441	793	0.282508	0.00298703	.	.	.	.	118	768	25	1896	2807	0.129528	0.84303	0.0274424	0.174825	0.0315259
lisinopril	pregabalin	Drug - Neurological	15	0.00534378	16	0.00570004	0.00306387	.	.	.	.	13	14	2	2778	2807	0.448276	0.482759	0.0689655	0.133333	0.125
rosuvastatin	losartan	Drug - Cardiovascular	65	0.0231564	27	0.00961881	0.00307992	.	.	.	.	61	23	4	2719	2807	0.693182	0.261364	0.0454545	0.0615385	0.148148
collagen	nifedipine	Drug - Cardiovascular	3	0.00106876	3	0.00106876	0.00320398	.	.	.	.	2	2	1	2802	2807	0.4	0.4	0.2	0.333333	0.333333
fenofibrate	nifedipine	Drug - Cardiovascular	3	0.00106876	3	0.00106876	0.00320398	.	x	.	x	2	2	1	2802	2807	0.4	0.4	0.2	0.333333	0.333333
fenofibrate	repaglinide	Drug - Metabolic	3	0.00106876	3	0.00106876	0.00320398	.	.	.	.	2	2	1	2802	2807	0.4	0.4	0.2	0.333333	0.333333
fluoxetine	quetiapine	Drug - Psychoactive	3	0.00106876	3	0.00106876	0.00320398	.	.	.	.	2	2	1	2802	2807	0.4	0.4	0.2	0.333333	0.333333
Omega-6 fatty acids	nifedipine	Drug - Cardiovascular	3	0.00106876	3	0.00106876	0.00320398	.	x	.	x	2	2	1	2802	2807	0.4	0.4	0.2	0.333333	0.333333
unspecified antibiotic	quetiapine	Drug - Psychoactive	3	0.00106876	3	0.00106876	0.00320398	.	x	.	x	2	2	1	2802	2807	0.4	0.4	0.2	0.333333	0.333333
unspecified colon	carbamazepine glucuronide*	Drug - Neurological	3	0.00106876	3	0.00106876	0.00320398	.	x	.	x	2	2	1	2802	2807	0.4	0.4	0.2	0.333333	0.333333
arginine	ezetimibe glucuronide*	Drug - Metabolic	1	0.000356252	9	0.00320627	0.00320627	.	x	.	x	0	8	1	2798	2807	0	0.888889	0.111111	1	0.111111
ezetimibe	ezetimibe glucuronide*	Drug - Metabolic	1	0.000356252	9	0.00320627	0.00320627	.	x	.	x	0	8	1	2798	2807	0	0.888889	0.111111	1	0.111111
statin	ezetimibe glucuronide*	Drug - Metabolic	1	0.000356252	9	0.00320627	0.00320627	.	x	.	x	0	8	1	2798	2807	0	0.888889	0.111111	1	0.111111
unspecified rheumatoid arthritis	omeprazole	Drug - Gastrointestinal	4	0.00142501	67	0.0238689	0.00326534	.	x	.	x	2	65	2	2738	2807	0.0289855	0.942029	0.0289855	0.5	0.0298507
azathioprine	furosemide	Drug - Cardiovascular	6	0.00213751	43	0.0153188	0.00330745	.	x	.	x	4	41	2	2760	2807	0.0851064	0.87234	0.0425532	0.333333	0.0465116
exenatide	meloxicam	Drug - Analgesics, Anesthetics	2	0.000712504	163	0.0580691	0.00335253	.	x	.	x	0	161	2	2644	2807	0	0.98773	0.0122699	1	0.0122699
clopidogrel	metoprolol acid metabolite*	Drug - Cardiovascular	17	0.00605629	180	0.0641254	0.00336868	.	.	.	.	12	175	5	2615	2807	0.0625	0.911458	0.0260417	0.294118	0.0277778
pioglitazone	hydrochlorothiazide	Drug - Cardiovascular	5	0.00178126	53	0.0188814	0.0033735	.	.	.	.	3	51	2	2751	2807	0.0535714	0.910714	0.0357143	0.4	0.0377358
calcium	o-hydroxyatorvastatin	Drug - Metabolic	95	0.033844	110	0.0391877	0.00347151	.	.	.	.	85	100	10	2612	2807	0.435897	0.512821	0.0512821	0.105263	0.0909091
glimepiride	valsartan	Drug - Cardiovascular	18	0.00641254	171	0.0609191	0.0035393	.	.	.	.	13	166	5	2623	2807	0.0706522	0.902174	0.0271739	0.277778	0.0292398
infliximab	chlorthalidone	Drug - Cardiovascular	2	0.000712504	5	0.00178126	0.00355998	x	x	x	x	1	4	1	2801	2807	0.166667	0.666667	0.166667	0.5	0.2
pregabalin	metoprolol	Drug - Cardiovascular	7	0.00249377	38	0.0135376	0.00359125	.	.	x	x	5	36	2	2764	2807	0.116279	0.837209	0.0465116	0.285714	0.0526316
calcium	atorvastatin (lipitor)	Drug - Metabolic	95	0.033844	45	0.0160314	0.00359232	.	.	.	.	89	39	6	2673	2807	0.664179	0.291045	0.0447761	0.0631579	0.133333
rosuvastatin	perindopril	Drug - Cardiovascular	65	0.0231564	14	0.00498753	0.00359526	.	.	.	.	62	11	3	2731	2807	0.815789	0.144737	0.0394737	0.0461538	0.214286
nifedipine	valsartan	Drug - Cardiovascular	2	0.000712504	171	0.0609191	0.00369075	.	.	.	.	0	169	2	2636	2807	0	0.988304	0.0116959	1	0.0116959
unspecified analgesic	gabapentin	Drug - Neurological	12	0.00427503	22	0.00783755	0.00369142	x	x	x	x	10	20	2	2775	2807	0.3125	0.625	0.0625	0.166667	0.0909091
enalapril	indapamide	Drug - Cardiovascular	8	0.00285002	34	0.0121126	0.00381032	.	.	.	.	6	32	2	2767	2807	0.15	0.8	0.05	0.25	0.0588235
levocetirizine	cetirizine	Drug - Respiratory	3	0.00106876	102	0.0363377	0.00383059	.	x	.	x	1	100	2	2704	2807	0.00970874	0.970874	0.0194175	0.666667	0.0196078
unspecified analgesic	2-methoxyacetaminophen sulfate*	Drug - Analgesics, Anesthetics	12	0.00427503	411	0.14642	0.00401254	.	.	.	.	6	405	6	2390	2807	0.0143885	0.971223	0.0143885	0.5	0.0145985
ranitidine	ranitidine N-oxide*	Drug - Gastrointestinal	14	0.00498753	20	0.00712504	0.00417047	.	.	x	x	12	18	2	2775	2807	0.375	0.5625	0.0625	0.142857	0.1
glimepiride	hydrochlorothiazide	Drug - Cardiovascular	18	0.00641254	53	0.0188814	0.0042458	.	.	.	.	15	50	3	2739	2807	0.220588	0.735294	0.0441176	0.166667	0.0566038
betamethasone	midazolam	Drug - Psychoactive	3	0.00106876	4	0.00142501	0.00427046	.	x	.	x	2	3	1	2801	2807	0.333333	0.5	0.166667	0.333333	0.25
meloxicam	glyburide	Drug - Metabolic	3	0.00106876	4	0.00142501	0.00427046	.	.	.	.	2	3	1	2801	2807	0.333333	0.5	0.166667	0.333333	0.25
unspecified antibiotic	moxifloxacin	Drug - Antibiotic	3	0.00106876	4	0.00142501	0.00427046	.	.	.	.	2	3	1	2801	2807	0.333333	0.5	0.166667	0.333333	0.25
clomifene	tamoxifen	Drug - Antineoplastic	2	0.000712504	6	0.00213751	0.00427122	.	x	.	x	1	5	1	2800	2807	0.142857	0.714286	0.142857	0.5	0.166667
dutasteride	ofloxacin	Drug - Antibiotic	2	0.000712504	6	0.00213751	0.00427122	x	x	x	x	1	5	1	2800	2807	0.142857	0.714286	0.142857	0.5	0.166667
unspecified hormonal therapy	tamoxifen	Drug - Antineoplastic	2	0.000712504	6	0.00213751	0.00427122	.	x	.	x	1	5	1	2800	2807	0.142857	0.714286	0.142857	0.5	0.166667
verapamil	verapamil	Drug - Cardiovascular	2	0.000712504	6	0.00213751	0.00427122	x	x	x	x	1	5	1	2800	2807	0.142857	0.714286	0.142857	0.5	0.166667
valsartan	sitagliptin	Drug - Metabolic	40	0.0142501	111	0.039544	0.00427154	.	.	.	.	34	105	6	2662	2807	0.234483	0.724138	0.0413793	0.15	0.0540541
glucosamine	salicyluric glucuronide*	Drug - Analgesics, Anesthetics	7	0.00249377	1292	0.460278	0.00433832	.	x	.	x	0	1285	7	1515	2807	0	0.994582	0.00541796	1	0.00541796
warfarin	metformin	Drug - Metabolic	9	0.00320627	846	0.301389	0.0043587	.	.	.	.	2	839	7	1959	2807	0.00235849	0.989387	0.00825472	0.777778	0.00827423
acetaminophen	diphenhydramine	Drug - Respiratory	17	0.00605629	57	0.0203064	0.00441188	.	.	.	.	14	54	3	2736	2807	0.197183	0.760563	0.0422535	0.176471	0.0526316
unspecified analgesic	2-hydroxyacetaminophen sulfate*	Drug - Analgesics, Anesthetics	12	0.00427503	575	0.204845	0.0044132	.	.	.	.	5	568	7	2227	2807	0.00862069	0.97931	0.012069	0.583333	0.0121739
bisoprolol	7-hydroxywarfarin	Drug - Cardiovascular	16	0.00570004	18	0.00641254	0.00442018	.	.	.	.	14	16	2	2775	2807	0.4375	0.5	0.0625	0.125	0.111111
atenolol	pregabalin	Drug - Neurological	18	0.00641254	16	0.00570004	0.00442018	.	.	.	.	16	14	2	2775	2807	0.5	0.4375	0.0625	0.111111	0.125
celecoxib	pregabalin	Drug - Neurological	18	0.00641254	16	0.00570004	0.00442018	.	.	.	.	16	14	2	2775	2807	0.5	0.4375	0.0625	0.111111	0.125
unspecified analgesic	2-methoxyacetaminophen glucuronide*	Drug - Analgesics, Anesthetics	12	0.00427503	419	0.14927	0.00443395	.	.	.	.	6	413	6	2382	2807	0.0141176	0.971765	0.0141176	0.5	0.0143198
acetylsalicylic acid	tadalafil	Drug - Cardiovascular	111	0.039544	82	0.0292127	0.00443625	.	.	.	.	102	73	9	2623	2807	0.554348	0.396739	0.048913	0.0810811	0.109756
unspecified dyslipidemia	metoprolol acid metabolite*	Drug - Cardiovascular	143	0.0509441	180	0.0641254	0.00444369	.	.	.	.	125	162	18	2502	2807	0.409836	0.531148	0.0590164	0.125874	0.1
fenofibrate	sitagliptin	Drug - Metabolic	3	0.00106876	111	0.039544	0.0045301	.	.	.	.	1	109	2	2695	2807	0.00892857	0.973214	0.0178571	0.666667	0.018018
unspecified antiasthmatic	1-hydroxy-2-naphthalenecarboxylate	Drug - Other	9	0.00320627	403	0.14357	0.00455855	.	x	.	x	4	398	5	2400	2807	0.00982801	0.977887	0.012285	0.555556	0.0124069
cyanocobalamin	10-hydroxywarfarin	Drug - Cardiovascular	1	0.000356252	13	0.00463128	0.00463128	.	x	.	x	0	12	1	2794	2807	0	0.923077	0.0769231	1	0.0769231
cyanocobalamin	6-hydroxywarfarin	Drug - Cardiovascular	1	0.000356252	13	0.00463128	0.00463128	.	.	.	.	0	12	1	2794	2807	0	0.923077	0.0769231	1	0.0769231
doxycycline	doxycycline	Drug - Antibiotic	1	0.000356252	13	0.00463128	0.00463128	x	x	x	x	0	12	1	2794	2807	0	0.923077	0.0769231	1	0.0769231
propafenone	10-hydroxywarfarin	Drug - Cardiovascular	1	0.000356252	13	0.00463128	0.00463128	.	x	.	x	0	12	1	2794	2807	0	0.923077	0.0769231	1	0.0769231
propafenone	6-hydroxywarfarin	Drug - Cardiovascular	1	0.000356252	13	0.00463128	0.00463128	.	.	.	.	0	12	1	2794	2807	0	0.923077	0.0769231	1	0.0769231
scopolamine	THC carboxylic acid glucuronide	Drug - Psychoactive	1	0.000356252	13	0.00463128	0.00463128	x	x	x	x	0	12	1	2794	2807	0	0.923077	0.0769231	1	0.0769231
sertraline	THC carboxylic acid glucuronide	Drug - Psychoactive	1	0.000356252	13	0.00463128	0.00463128	.	x	.	x	0	12	1	2794	2807	0	0.923077	0.0769231	1	0.0769231
simvastatin	indapamide	Drug - Cardiovascular	9	0.00320627	34	0.0121126	0.00486188	.	.	.	.	7	32	2	2766	2807	0.170732	0.780488	0.0487805	0.222222	0.0588235
Omega-3 fatty acids	hydrochlorothiazide	Drug - Cardiovascular	114	0.0406128	53	0.0188814	0.00495952	.	x	.	x	107	46	7	2647	2807	0.66875	0.2875	0.04375	0.0614035	0.132075
vitamin d	diphenhydramine	Drug - Respiratory	510	0.181689	57	0.0203064	0.00497622	.	.	.	.	491	38	19	2259	2807	0.895985	0.0693431	0.0346715	0.0372549	0.333333
arginine	perindopril	Drug - Cardiovascular	1	0.000356252	14	0.00498753	0.00498753	.	.	.	.	0	13	1	2793	2807	0	0.928571	0.0714286	1	0.0714286
ezetimibe	perindopril	Drug - Cardiovascular	1	0.000356252	14	0.00498753	0.00498753	.	.	.	.	0	13	1	2793	2807	0	0.928571	0.0714286	1	0.0714286
fusidic acid	desmethylnaproxen	Drug - Analgesics, Anesthetics	1	0.000356252	14	0.00498753	0.00498753	x	x	x	x	0	13	1	2793	2807	0	0.928571	0.0714286	1	0.0714286
naproxen	desmethylnaproxen	Drug - Analgesics, Anesthetics	1	0.000356252	14	0.00498753	0.00498753	.	x	.	x	0	13	1	2793	2807	0	0.928571	0.0714286	1	0.0714286
petrolatum	desmethylnaproxen	Drug - Analgesics, Anesthetics	1	0.000356252	14	0.00498753	0.00498753	.	x	.	x	0	13	1	2793	2807	0	0.928571	0.0714286	1	0.0714286
atorvastatin	omeprazole	Drug - Gastrointestinal	90	0.0320627	67	0.0238689	0.00500245	.	.	.	.	83	60	7	2657	2807	0.553333	0.4	0.0466667	0.0777778	0.104478
amlodipine	omeprazole	Drug - Gastrointestinal	30	0.0106876	67	0.0238689	0.00509227	.	.	.	.	26	63	4	2714	2807	0.27957	0.677419	0.0430108	0.133333	0.0597015
fexofenadine	montelukast	Drug - Respiratory	12	0.00427503	26	0.00926256	0.0051444	.	.	.	.	10	24	2	2771	2807	0.277778	0.666667	0.0555556	0.166667	0.0769231
celecoxib	diphenhydramine	Drug - Respiratory	18	0.00641254	57	0.0203064	0.00521856	.	.	.	.	15	54	3	2735	2807	0.208333	0.75	0.0416667	0.166667	0.0526316
fexofenadine	pantoprazole	Drug - Gastrointestinal	12	0.00427503	88	0.0313502	0.00533629	.	.	.	.	9	85	3	2710	2807	0.0927835	0.876289	0.0309278	0.25	0.0340909
perindopril	metoprolol acid metabolite*	Drug - Cardiovascular	12	0.00427503	180	0.0641254	0.00538627	.	.	.	.	8	176	4	2619	2807	0.0425532	0.93617	0.0212766	0.333333	0.0222222
atorvastatin	hydroxypioglitazone (M-IV)	Drug - Metabolic	90	0.0320627	23	0.0081938	0.00548531	.	.	.	.	86	19	4	2698	2807	0.788991	0.174312	0.0366972	0.0444444	0.173913
enalapril	atenolol	Drug - Cardiovascular	8	0.00285002	140	0.0498753	0.00565272	.	.	.	.	5	137	3	2662	2807	0.0344828	0.944828	0.0206897	0.375	0.0214286
acyclovir	pregabalin	Drug - Neurological	1	0.000356252	16	0.00570004	0.00570004	.	x	.	x	0	15	1	2791	2807	0	0.9375	0.0625	1	0.0625
carbamazepine	carbamazepine	Drug - Neurological	1	0.000356252	16	0.00570004	0.00570004	.	.	x	x	0	15	1	2791	2807	0	0.9375	0.0625	1	0.0625
haloperidol	pregabalin	Drug - Neurological	1	0.000356252	16	0.00570004	0.00570004	.	x	.	x	0	15	1	2791	2807	0	0.9375	0.0625	1	0.0625
moxonidine	carbamazepine	Drug - Neurological	1	0.000356252	16	0.00570004	0.00570004	.	x	.	x	0	15	1	2791	2807	0	0.9375	0.0625	1	0.0625
rebamipide	pregabalin	Drug - Neurological	1	0.000356252	16	0.00570004	0.00570004	.	x	.	x	0	15	1	2791	2807	0	0.9375	0.0625	1	0.0625
risperidone	pregabalin	Drug - Neurological	1	0.000356252	16	0.00570004	0.00570004	.	x	.	x	0	15	1	2791	2807	0	0.9375	0.0625	1	0.0625
tizanidine	pregabalin	Drug - Neurological	1	0.000356252	16	0.00570004	0.00570004	.	x	.	x	0	15	1	2791	2807	0	0.9375	0.0625	1	0.0625
unspecified antiepileptic	pregabalin	Drug - Neurological	1	0.000356252	16	0.00570004	0.00570004	.	x	.	x	0	15	1	2791	2807	0	0.9375	0.0625	1	0.0625
unspecified supplement	imipramine	Drug - Psychoactive	16	0.00570004	1	0.000356252	0.00570004	.	x	.	x	15	0	1	2791	2807	0.9375	0	0.0625	0.0625	1
multivitamin	carboxyibuprofen	Drug - Analgesics, Anesthetics	276	0.0983256	102	0.0363377	0.00571942	.	.	x	x	257	83	19	2448	2807	0.715877	0.231198	0.0529248	0.0688406	0.186275
sitagliptin	ezetimibe glucuronide*	Drug - Metabolic	37	0.0131813	9	0.00320627	0.00574305	.	.	.	.	35	7	2	2763	2807	0.795455	0.159091	0.0454545	0.0540541	0.222222
cetirizine	lidocaine	Drug - Analgesics, Anesthetics	7	0.00249377	164	0.0584254	0.00575712	.	.	x	x	4	161	3	2639	2807	0.0238095	0.958333	0.0178571	0.428571	0.0182927
vitamin d	hydrochlorothiazide	Drug - Cardiovascular	510	0.181689	53	0.0188814	0.00589407	.	.	.	.	492	35	18	2262	2807	0.902752	0.0642202	0.0330275	0.0352941	0.339623
sitagliptin	Gliclazide	Drug - Metabolic	37	0.0131813	468	0.166726	0.00594917	.	.	.	.	24	455	13	2315	2807	0.0487805	0.924797	0.0264228	0.351351	0.0277778
sitagliptin	valsartan	Drug - Cardiovascular	37	0.0131813	171	0.0609191	0.00597281	.	.	.	.	30	164	7	2606	2807	0.149254	0.81592	0.0348259	0.189189	0.0409357
metformin	olmesartan	Drug - Cardiovascular	220	0.0783755	2	0.000712504	0.00611698	.	.	.	.	218	0	2	2587	2807	0.990909	0	0.00909091	0.00909091	1
vitamin e	topiramate	Drug - Neurological	17	0.00605629	20	0.00712504	0.00615343	.	x	.	x	15	18	2	2772	2807	0.428571	0.514286	0.0571429	0.117647	0.1
unspecified heart	valsartan	Drug - Cardiovascular	13	0.00463128	171	0.0609191	0.00615842	.	.	.	.	9	167	4	2627	2807	0.05	0.927778	0.0222222	0.307692	0.0233918
omeprazole	diclofenac	Drug - Analgesics, Anesthetics	27	0.00961881	79	0.0281439	0.00623301	.	.	.	.	23	75	4	2705	2807	0.22549	0.735294	0.0392157	0.148148	0.0506329
betamethasone	verapamil	Drug - Cardiovascular	3	0.00106876	6	0.00213751	0.00640112	.	.	.	.	2	5	1	2799	2807	0.25	0.625	0.125	0.333333	0.166667
prednisolone	mycophenolic acid glucuronide	Drug - Antiinflammatory, Immunosuppressant	3	0.00106876	6	0.00213751	0.00640112	.	x	.	x	2	5	1	2799	2807	0.25	0.625	0.125	0.333333	0.166667
cyanocobalamin	7-hydroxywarfarin	Drug - Cardiovascular	1	0.000356252	18	0.00641254	0.00641254	.	.	.	.	0	17	1	2789	2807	0	0.944444	0.0555556	1	0.0555556
propafenone	7-hydroxywarfarin	Drug - Cardiovascular	1	0.000356252	18	0.00641254	0.00641254	.	.	.	.	0	17	1	2789	2807	0	0.944444	0.0555556	1	0.0555556
celecoxib	imipramine	Drug - Psychoactive	18	0.00641254	1	0.000356252	0.00641254	.	.	.	.	17	0	1	2789	2807	0.944444	0	0.0555556	0.0555556	1
calcium	valsartan	Drug - Cardiovascular	95	0.033844	171	0.0609191	0.00660532	.	.	.	.	82	158	13	2554	2807	0.324111	0.624506	0.0513834	0.136842	0.0760234
unspecified nasal spray	pseudoephedrine	Drug - Respiratory	10	0.00356252	117	0.0416815	0.00683357	x	x	x	x	7	114	3	2683	2807	0.0564516	0.919355	0.0241935	0.3	0.025641
insulin aspart	carboxyibuprofen	Drug - Analgesics, Anesthetics	63	0.0224439	102	0.0363377	0.00706523	.	.	.	.	56	95	7	2649	2807	0.35443	0.601266	0.0443038	0.111111	0.0686275
montelukast	moxifloxacin	Drug - Antibiotic	5	0.00178126	4	0.00142501	0.00710982	.	.	.	.	4	3	1	2799	2807	0.5	0.375	0.125	0.2	0.25
pioglitazone	4-hydroxy duloxetine glucuronide*	Drug - Psychoactive	5	0.00178126	4	0.00142501	0.00710982	.	.	.	.	4	3	1	2799	2807	0.5	0.375	0.125	0.2	0.25
pioglitazone	5-hydroxy-6-methoxy duloxetine sulfate*	Drug - Psychoactive	5	0.00178126	4	0.00142501	0.00710982	.	.	.	.	4	3	1	2799	2807	0.5	0.375	0.125	0.2	0.25
omeprazole	tadalafil	Drug - Cardiovascular	27	0.00961881	82	0.0292127	0.00711393	.	.	.	.	23	78	4	2702	2807	0.219048	0.742857	0.0380952	0.148148	0.0487805
unspecified nasal spray	amoxicillin	Drug - Antibiotic	10	0.00356252	37	0.0131813	0.00711942	.	.	x	x	8	35	2	2762	2807	0.177778	0.777778	0.0444444	0.2	0.0540541
buspirone	ranitidine N-oxide*	Drug - Gastrointestinal	1	0.000356252	20	0.00712504	0.00712504	.	.	.	.	0	19	1	2787	2807	0	0.95	0.05	1	0.05
clonazepam	topiramate	Drug - Neurological	1	0.000356252	20	0.00712504	0.00712504	.	x	.	x	0	19	1	2787	2807	0	0.95	0.05	1	0.05
phentermine	topiramate	Drug - Neurological	1	0.000356252	20	0.00712504	0.00712504	.	x	.	x	0	19	1	2787	2807	0	0.95	0.05	1	0.05
scopolamine	ranitidine N-oxide*	Drug - Gastrointestinal	1	0.000356252	20	0.00712504	0.00712504	.	.	.	.	0	19	1	2787	2807	0	0.95	0.05	1	0.05
unspecified kidney	ranitidine N-oxide*	Drug - Gastrointestinal	1	0.000356252	20	0.00712504	0.00712504	.	.	.	.	0	19	1	2787	2807	0	0.95	0.05	1	0.05
amitriptyline	atenolol	Drug - Cardiovascular	3	0.00106876	140	0.0498753	0.00716887	.	.	.	.	1	138	2	2666	2807	0.0070922	0.978723	0.0141844	0.666667	0.0142857
ginseng	2-hydroxyacetaminophen sulfate*	Drug - Analgesics, Anesthetics	5	0.00178126	575	0.204845	0.00730805	.	.	.	.	1	571	4	2231	2807	0.00173611	0.991319	0.00694444	0.8	0.00695652
unspecified heart	metoprolol acid metabolite*	Drug - Cardiovascular	13	0.00463128	180	0.0641254	0.00739563	.	.	.	.	9	176	4	2618	2807	0.047619	0.931217	0.021164	0.307692	0.0222222
unspecified dyslipidemia	Glimepiride	Drug - Metabolic	143	0.0509441	25	0.00890631	0.00743303	.	.	.	.	138	20	5	2644	2807	0.846626	0.122699	0.0306748	0.034965	0.2
unspecified prostate	salicyluric glucuronide*	Drug - Analgesics, Anesthetics	10	0.00356252	1292	0.460278	0.00743304	.	.	.	.	1	1283	9	1514	2807	0.000773395	0.992266	0.00696056	0.9	0.00696594
rosuvastatin	metoprolol acid metabolite*	Drug - Cardiovascular	65	0.0231564	180	0.0641254	0.00744091	.	.	.	.	55	170	10	2572	2807	0.234043	0.723404	0.0425532	0.153846	0.0555556
hydrochlorothiazide	4-acetaminophen sulfate	Drug - Analgesics, Anesthetics	8	0.00285002	1102	0.39259	0.00747697	.	.	.	.	1	1095	7	1704	2807	0.000906618	0.992747	0.00634633	0.875	0.00635209
sertraline	THC carboxylic acid	Drug - Psychoactive	1	0.000356252	21	0.0074813	0.0074813	.	.	x	x	0	20	1	2786	2807	0	0.952381	0.047619	1	0.047619
unspecified anxiety	desmethylcitalopram*	Drug - Psychoactive	1	0.000356252	21	0.0074813	0.0074813	.	x	.	x	0	20	1	2786	2807	0	0.952381	0.047619	1	0.047619
unspecified multiple sclerosis	desmethylcitalopram*	Drug - Psychoactive	1	0.000356252	21	0.0074813	0.0074813	.	x	.	x	0	20	1	2786	2807	0	0.952381	0.047619	1	0.047619
unspecified prostate	metoprolol	Drug - Cardiovascular	10	0.00356252	38	0.0135376	0.00750065	.	.	.	.	8	36	2	2761	2807	0.173913	0.782609	0.0434783	0.2	0.0526316
unspecified diabetes	atorvastatin (lipitor)	Drug - Metabolic	50	0.0178126	45	0.0160314	0.00775676	.	.	.	.	46	41	4	2716	2807	0.505495	0.450549	0.043956	0.08	0.0888889
perindopril	Gliclazide	Drug - Metabolic	12	0.00427503	468	0.166726	0.00780473	.	.	.	.	6	462	6	2333	2807	0.0126582	0.974684	0.0126582	0.5	0.0128205
cyanocobalamin	gabapentin	Drug - Neurological	1	0.000356252	22	0.00783755	0.00783755	.	.	.	.	0	21	1	2785	2807	0	0.954545	0.0454545	1	0.0454545
gabapentin	gabapentin	Drug - Neurological	1	0.000356252	22	0.00783755	0.00783755	.	x	.	x	0	21	1	2785	2807	0	0.954545	0.0454545	1	0.0454545
montelukast	4-hydroxycoumarin	Drug - Cardiovascular	5	0.00178126	1741	0.620235	0.00785312	.	.	x	x	5	1741	0	1061	2807	0.00286369	0.997136	0	0	0
unspecified hypertension	omeprazole	Drug - Gastrointestinal	98	0.0349127	67	0.0238689	0.00796674	.	.	.	.	91	60	7	2649	2807	0.575949	0.379747	0.0443038	0.0714286	0.104478
atenolol	salicyluric glucuronide*	Drug - Analgesics, Anesthetics	18	0.00641254	1292	0.460278	0.00804214	.	.	.	.	4	1278	14	1511	2807	0.00308642	0.986111	0.0108025	0.777778	0.0108359
glimepiride	salicyluric glucuronide*	Drug - Analgesics, Anesthetics	18	0.00641254	1292	0.460278	0.00804214	.	.	.	.	4	1278	14	1511	2807	0.00308642	0.986111	0.0108025	0.777778	0.0108359
amlodipine	4-acetaminophen sulfate	Drug - Analgesics, Anesthetics	30	0.0106876	1102	0.39259	0.0081745	.	.	.	.	11	1083	19	1694	2807	0.0098832	0.973046	0.017071	0.633333	0.0172414
unspecified dyslipidemia	celecoxib	Drug - Analgesics, Anesthetics	143	0.0509441	58	0.0206626	0.00819112	.	.	.	.	135	50	8	2614	2807	0.699482	0.259067	0.0414508	0.0559441	0.137931
sildenafil	hydroxypioglitazone (M-IV)	Drug - Metabolic	1	0.000356252	23	0.0081938	0.0081938	.	x	.	x	0	22	1	2784	2807	0	0.956522	0.0434783	1	0.0434783
valsartan	ciprofloxacin	Drug - Antibiotic	40	0.0142501	10	0.00356252	0.00829055	.	.	x	x	38	8	2	2759	2807	0.791667	0.166667	0.0416667	0.05	0.2
ranitidine	pantoprazole	Drug - Gastrointestinal	14	0.00498753	88	0.0313502	0.00843711	.	.	.	.	11	85	3	2708	2807	0.111111	0.858586	0.030303	0.214286	0.0340909
vitamin a	mycophenolic acid glucuronide	Drug - Antiinflammatory, Immunosuppressant	4	0.00142501	6	0.00213751	0.00852722	.	x	.	x	3	5	1	2798	2807	0.333333	0.555556	0.111111	0.25	0.166667
prednisolone	mycophenolic acid	Drug - Antiinflammatory, Immunosuppressant	3	0.00106876	8	0.00285002	0.00852874	.	.	.	.	2	7	1	2797	2807	0.2	0.7	0.1	0.333333	0.125
tramadol	tramadol	Drug - Analgesics, Anesthetics	1	0.000356252	24	0.00855005	0.00855005	x	x	x	x	0	23	1	2783	2807	0	0.958333	0.0416667	1	0.0416667
valsartan	metformin	Drug - Metabolic	40	0.0142501	846	0.301389	0.00856973	.	.	.	.	20	826	20	1941	2807	0.0230947	0.953811	0.0230947	0.5	0.0236407
perindopril	indapamide	Drug - Cardiovascular	12	0.00427503	34	0.0121126	0.00871274	.	.	.	.	10	32	2	2763	2807	0.227273	0.727273	0.0454545	0.166667	0.0588235
insulin aspart	amoxicillin	Drug - Antibiotic	63	0.0224439	37	0.0131813	0.00873798	.	.	.	.	59	33	4	2711	2807	0.614583	0.34375	0.0416667	0.0634921	0.108108
unspecified rheumatoid arthritis	sitagliptin	Drug - Metabolic	4	0.00142501	111	0.039544	0.0088262	.	.	.	.	2	109	2	2694	2807	0.0176991	0.964602	0.0176991	0.5	0.018018
simvastatin	Gliclazide	Drug - Metabolic	9	0.00320627	468	0.166726	0.0088527	.	.	.	.	4	463	5	2335	2807	0.00847458	0.980932	0.0105932	0.555556	0.0106838
pioglitazone	duloxetine	Drug - Psychoactive	5	0.00178126	5	0.00178126	0.00888094	.	.	x	x	4	4	1	2798	2807	0.444444	0.444444	0.111111	0.2	0.2
atenolol	ketopioglitazone	Drug - Metabolic	18	0.00641254	69	0.0245814	0.00890437	.	.	.	.	15	66	3	2723	2807	0.178571	0.785714	0.0357143	0.166667	0.0434783
cyanocobalamin	Glimepiride	Drug - Metabolic	1	0.000356252	25	0.00890631	0.00890631	.	.	.	.	0	24	1	2782	2807	0	0.96	0.04	1	0.04
ramipril	Glimepiride	Drug - Metabolic	1	0.000356252	25	0.00890631	0.00890631	.	x	.	x	0	24	1	2782	2807	0	0.96	0.04	1	0.04
Omega-3 fatty acids	valsartan	Drug - Cardiovascular	114	0.0406128	171	0.0609191	0.00890939	.	.	.	.	100	157	14	2536	2807	0.369004	0.579336	0.0516605	0.122807	0.0818713
atenolol	hydroxypioglitazone (M-IV)	Drug - Metabolic	18	0.00641254	23	0.0081938	0.00907484	.	.	.	.	16	21	2	2768	2807	0.410256	0.538462	0.0512821	0.111111	0.0869565
insulin aspart	Gliclazide	Drug - Metabolic	63	0.0224439	468	0.166726	0.00910337	.	.	.	.	44	449	19	2295	2807	0.0859375	0.876953	0.0371094	0.301587	0.0405983
exenatide	enalapril	Drug - Cardiovascular	2	0.000712504	13	0.00463128	0.00924275	.	.	.	.	1	12	1	2793	2807	0.0714286	0.857143	0.0714286	0.5	0.0769231
nitroglycerin	10-hydroxywarfarin	Drug - Cardiovascular	2	0.000712504	13	0.00463128	0.00924275	.	x	.	x	1	12	1	2793	2807	0.0714286	0.857143	0.0714286	0.5	0.0769231
nitroglycerin	6-hydroxywarfarin	Drug - Cardiovascular	2	0.000712504	13	0.00463128	0.00924275	.	.	.	.	1	12	1	2793	2807	0.0714286	0.857143	0.0714286	0.5	0.0769231
simethicone	THC carboxylic acid glucuronide	Drug - Psychoactive	2	0.000712504	13	0.00463128	0.00924275	.	x	.	x	1	12	1	2793	2807	0.0714286	0.857143	0.0714286	0.5	0.0769231
verapamil	10-hydroxywarfarin	Drug - Cardiovascular	2	0.000712504	13	0.00463128	0.00924275	.	.	.	.	1	12	1	2793	2807	0.0714286	0.857143	0.0714286	0.5	0.0769231
verapamil	6-hydroxywarfarin	Drug - Cardiovascular	2	0.000712504	13	0.00463128	0.00924275	.	.	.	.	1	12	1	2793	2807	0.0714286	0.857143	0.0714286	0.5	0.0769231
formoterol	montelukast	Drug - Respiratory	1	0.000356252	26	0.00926256	0.00926256	.	.	.	.	0	25	1	2781	2807	0	0.961538	0.0384615	1	0.0384615
unspecified allergic rhinitis	montelukast	Drug - Respiratory	1	0.000356252	26	0.00926256	0.00926256	.	x	.	x	0	25	1	2781	2807	0	0.961538	0.0384615	1	0.0384615
unspecified antidepressant	4-acetaminophen sulfate	Drug - Analgesics, Anesthetics	5	0.00178126	1102	0.39259	0.00927465	.	.	.	.	0	1097	5	1705	2807	0	0.995463	0.00453721	1	0.00453721
unspecified gastroesophageal reflux	pioglitazone	Drug - Metabolic	14	0.00498753	30	0.0106876	0.00927991	.	.	.	.	12	28	2	2765	2807	0.285714	0.666667	0.047619	0.142857	0.0666667
sitagliptin	indapamide	Drug - Cardiovascular	37	0.0131813	34	0.0121126	0.0095268	.	.	.	.	34	31	3	2739	2807	0.5	0.455882	0.0441176	0.0810811	0.0882353
fusidic acid	desmethylnaproxen sulfate	Drug - Analgesics, Anesthetics	1	0.000356252	27	0.00961881	0.00961881	.	.	x	x	0	26	1	2780	2807	0	0.962963	0.037037	1	0.037037
glyburide	losartan	Drug - Cardiovascular	1	0.000356252	27	0.00961881	0.00961881	.	.	.	.	0	26	1	2780	2807	0	0.962963	0.037037	1	0.037037
naproxen	desmethylnaproxen sulfate	Drug - Analgesics, Anesthetics	1	0.000356252	27	0.00961881	0.00961881	.	.	.	.	0	26	1	2780	2807	0	0.962963	0.037037	1	0.037037
petrolatum	desmethylnaproxen sulfate	Drug - Analgesics, Anesthetics	1	0.000356252	27	0.00961881	0.00961881	.	.	.	.	0	26	1	2780	2807	0	0.962963	0.037037	1	0.037037
not annotated	imipramine	Drug - Psychoactive	27	0.00961881	1	0.000356252	0.00961881	.	x	.	x	26	0	1	2780	2807	0.962963	0	0.037037	0.037037	1
levothyroxine	topiramate	Drug - Neurological	193	0.0687567	20	0.00712504	0.00966256	.	x	.	x	188	15	5	2599	2807	0.903846	0.0721154	0.0240385	0.0259067	0.25
losartan	hydrochlorothiazide	Drug - Cardiovascular	24	0.00855005	53	0.0188814	0.00972297	.	.	.	.	21	50	3	2733	2807	0.283784	0.675676	0.0405405	0.125	0.0566038
Omega-6 fatty acids	lidocaine	Drug - Analgesics, Anesthetics	3	0.00106876	164	0.0584254	0.00978973	.	.	.	.	1	162	2	2642	2807	0.00606061	0.981818	0.0121212	0.666667	0.0121951
acetylsalicylic acid	indapamide	Drug - Cardiovascular	111	0.039544	34	0.0121126	0.00982383	.	.	.	.	106	29	5	2667	2807	0.757143	0.207143	0.0357143	0.045045	0.147059
diclofenac	moxifloxacin	Drug - Antibiotic	7	0.00249377	4	0.00142501	0.00994311	.	x	.	x	6	3	1	2797	2807	0.6	0.3	0.1	0.142857	0.25
alfuzosin	fluoxetine	Drug - Psychoactive	2	0.000712504	14	0.00498753	0.00995196	.	.	.	.	1	13	1	2792	2807	0.0666667	0.866667	0.0666667	0.5	0.0714286
diltiazem	perindopril	Drug - Cardiovascular	2	0.000712504	14	0.00498753	0.00995196	.	x	.	x	1	13	1	2792	2807	0.0666667	0.866667	0.0666667	0.5	0.0714286
dutasteride	perindopril	Drug - Cardiovascular	2	0.000712504	14	0.00498753	0.00995196	.	.	.	.	1	13	1	2792	2807	0.0666667	0.866667	0.0666667	0.5	0.0714286
mometasone furoate	desmethylnaproxen	Drug - Analgesics, Anesthetics	2	0.000712504	14	0.00498753	0.00995196	.	.	.	.	1	13	1	2792	2807	0.0666667	0.866667	0.0666667	0.5	0.0714286
cyanocobalamin	dexlansoprazole	Drug - Gastrointestinal	1	0.000356252	28	0.00997506	0.00997506	.	.	.	.	0	27	1	2779	2807	0	0.964286	0.0357143	1	0.0357143
mosapride	dexlansoprazole	Drug - Gastrointestinal	1	0.000356252	28	0.00997506	0.00997506	.	x	.	x	0	27	1	2779	2807	0	0.964286	0.0357143	1	0.0357143
ramipril	dexlansoprazole	Drug - Gastrointestinal	1	0.000356252	28	0.00997506	0.00997506	.	.	.	.	0	27	1	2779	2807	0	0.964286	0.0357143	1	0.0357143
acetylsalicylic acid	4-acetamidophenol	Drug - Analgesics, Anesthetics	111	0.039544	708	0.252227	0.0100181	.	.	.	.	71	668	40	2028	2807	0.0911425	0.85751	0.0513479	0.36036	0.0564972
furosemide	oxypurinol	Drug - Metabolic	2	0.000712504	282	0.100463	0.0100606	.	x	.	x	0	280	2	2525	2807	0	0.992908	0.0070922	1	0.0070922
varenicline	oxypurinol	Drug - Metabolic	2	0.000712504	282	0.100463	0.0100606	.	x	.	x	0	280	2	2525	2807	0	0.992908	0.0070922	1	0.0070922
multivitamin	topiramate	Drug - Neurological	276	0.0983256	20	0.00712504	0.0101086	.	.	.	.	270	14	6	2517	2807	0.931034	0.0482759	0.0206897	0.0217391	0.3
vitamin b	pregabalin	Drug - Neurological	82	0.0292127	16	0.00570004	0.0102236	.	x	.	x	79	13	3	2712	2807	0.831579	0.136842	0.0315789	0.0365854	0.1875
amlodipine	4-acetamidophenylglucuronide	Drug - Analgesics, Anesthetics	30	0.0106876	938	0.334165	0.0102357	.	.	.	.	13	921	17	1856	2807	0.0136698	0.968454	0.0178759	0.566667	0.0181237
unspecified diabetes	ibuprofen	Drug - Analgesics, Anesthetics	50	0.0178126	793	0.282508	0.0102846	.	.	.	.	44	787	6	1970	2807	0.0525687	0.940263	0.00716846	0.12	0.0075662
metformin	7-hydroxywarfarin	Drug - Cardiovascular	220	0.0783755	18	0.00641254	0.0103862	.	.	.	.	215	13	5	2574	2807	0.922747	0.055794	0.0214592	0.0227273	0.277778
escitalopram	atorvastatin (lipitor)	Drug - Metabolic	10	0.00356252	45	0.0160314	0.0104229	.	.	.	.	8	43	2	2754	2807	0.150943	0.811321	0.0377358	0.2	0.0444444
unspecified prostate	alpha-hydroxymetoprolol	Drug - Cardiovascular	10	0.00356252	45	0.0160314	0.0104229	.	.	.	.	8	43	2	2754	2807	0.150943	0.811321	0.0377358	0.2	0.0444444
unspecified prostate	atorvastatin (lipitor)	Drug - Metabolic	10	0.00356252	45	0.0160314	0.0104229	.	.	.	.	8	43	2	2754	2807	0.150943	0.811321	0.0377358	0.2	0.0444444
atorvastatin	valsartan	Drug - Cardiovascular	90	0.0320627	171	0.0609191	0.0106254	.	.	.	.	78	159	12	2558	2807	0.313253	0.638554	0.0481928	0.133333	0.0701754
unspecified colon	valsartan	Drug - Cardiovascular	3	0.00106876	171	0.0609191	0.0106275	.	.	.	.	1	169	2	2635	2807	0.00581395	0.982558	0.0116279	0.666667	0.0116959
sitagliptin	omeprazole	Drug - Gastrointestinal	37	0.0131813	67	0.0238689	0.0108295	.	.	.	.	33	63	4	2707	2807	0.33	0.63	0.04	0.108108	0.0597015
levothyroxine	sitagliptin	Drug - Metabolic	193	0.0687567	111	0.039544	0.0108613	.	.	.	.	178	96	15	2518	2807	0.615917	0.33218	0.0519031	0.0777202	0.135135
unspecified anxiety	citalopram/escitalopram	Drug - Psychoactive	1	0.000356252	31	0.0110438	0.0110438	.	.	.	.	0	30	1	2776	2807	0	0.967742	0.0322581	1	0.0322581
unspecified multiple sclerosis	citalopram/escitalopram	Drug - Psychoactive	1	0.000356252	31	0.0110438	0.0110438	.	.	.	.	0	30	1	2776	2807	0	0.967742	0.0322581	1	0.0322581
clopidogrel	losartan	Drug - Cardiovascular	17	0.00605629	27	0.00961881	0.0110881	.	.	.	.	15	25	2	2765	2807	0.357143	0.595238	0.047619	0.117647	0.0740741
folic acid	clarithromycin	Drug - Antibiotic	33	0.0117563	14	0.00498753	0.0111681	x	x	x	x	31	12	2	2762	2807	0.688889	0.266667	0.0444444	0.0606061	0.142857
vitamin d	sitagliptin	Drug - Metabolic	510	0.181689	111	0.039544	0.0113277	.	.	.	.	479	80	31	2217	2807	0.811864	0.135593	0.0525424	0.0607843	0.279279
vitamin a	mycophenolic acid	Drug - Antiinflammatory, Immunosuppressant	4	0.00142501	8	0.00285002	0.0113575	.	.	.	.	3	7	1	2796	2807	0.272727	0.636364	0.0909091	0.25	0.125
desloratadine	moxifloxacin	Drug - Antibiotic	8	0.00285002	4	0.00142501	0.0113575	.	.	.	.	7	3	1	2796	2807	0.636364	0.272727	0.0909091	0.125	0.25
alfuzosin	norfluoxetine	Drug - Psychoactive	2	0.000712504	16	0.00570004	0.0113696	.	.	.	.	1	15	1	2790	2807	0.0588235	0.882353	0.0588235	0.5	0.0625
exenatide	carbamazepine	Drug - Neurological	2	0.000712504	16	0.00570004	0.0113696	.	.	.	.	1	15	1	2790	2807	0.0588235	0.882353	0.0588235	0.5	0.0625
mebeverine	pregabalin	Drug - Neurological	2	0.000712504	16	0.00570004	0.0113696	.	x	.	x	1	15	1	2790	2807	0.0588235	0.882353	0.0588235	0.5	0.0625
nifedipine	carbamazepine	Drug - Neurological	2	0.000712504	16	0.00570004	0.0113696	.	.	.	.	1	15	1	2790	2807	0.0588235	0.882353	0.0588235	0.5	0.0625
paroxetine	carbamazepine	Drug - Neurological	2	0.000712504	16	0.00570004	0.0113696	.	x	.	x	1	15	1	2790	2807	0.0588235	0.882353	0.0588235	0.5	0.0625
unspecified obesity	carbamazepine	Drug - Neurological	2	0.000712504	16	0.00570004	0.0113696	.	x	.	x	1	15	1	2790	2807	0.0588235	0.882353	0.0588235	0.5	0.0625
unspecified diabetes	losartan	Drug - Cardiovascular	50	0.0178126	27	0.00961881	0.0115162	.	.	.	.	47	24	3	2733	2807	0.635135	0.324324	0.0405405	0.06	0.111111
warfarin	hydrochlorothiazide	Drug - Cardiovascular	9	0.00320627	53	0.0188814	0.0115697	.	.	.	.	7	51	2	2747	2807	0.116667	0.85	0.0333333	0.222222	0.0377358
amitriptyline	metoprolol acid metabolite*	Drug - Cardiovascular	3	0.00106876	180	0.0641254	0.0117529	.	.	.	.	1	178	2	2626	2807	0.00552486	0.983425	0.0110497	0.666667	0.0111111
isosorbide dinitrate	metoprolol acid metabolite*	Drug - Cardiovascular	3	0.00106876	180	0.0641254	0.0117529	.	.	.	.	1	178	2	2626	2807	0.00552486	0.983425	0.0110497	0.666667	0.0111111
clopidogrel	dexlansoprazole	Drug - Gastrointestinal	17	0.00605629	28	0.00997506	0.0118986	.	.	.	.	15	26	2	2764	2807	0.348837	0.604651	0.0465116	0.117647	0.0714286
arginine	indapamide	Drug - Cardiovascular	1	0.000356252	34	0.0121126	0.0121126	.	.	.	.	0	33	1	2773	2807	0	0.970588	0.0294118	1	0.0294118
ezetimibe	indapamide	Drug - Cardiovascular	1	0.000356252	34	0.0121126	0.0121126	.	.	.	.	0	33	1	2773	2807	0	0.970588	0.0294118	1	0.0294118
moxonidine	indapamide	Drug - Cardiovascular	1	0.000356252	34	0.0121126	0.0121126	.	.	.	.	0	33	1	2773	2807	0	0.970588	0.0294118	1	0.0294118
unspecified anxiety	citalopram propionate*	Drug - Psychoactive	1	0.000356252	34	0.0121126	0.0121126	.	.	.	.	0	33	1	2773	2807	0	0.970588	0.0294118	1	0.0294118
unspecified multiple sclerosis	citalopram propionate*	Drug - Psychoactive	1	0.000356252	34	0.0121126	0.0121126	.	.	.	.	0	33	1	2773	2807	0	0.970588	0.0294118	1	0.0294118
unspecified urination control	indapamide	Drug - Cardiovascular	1	0.000356252	34	0.0121126	0.0121126	.	x	.	x	0	33	1	2773	2807	0	0.970588	0.0294118	1	0.0294118
atenolol	losartan	Drug - Cardiovascular	18	0.00641254	27	0.00961881	0.0124005	.	.	.	.	16	25	2	2764	2807	0.372093	0.581395	0.0465116	0.111111	0.0740741
ramipril	fluconazole	Drug - Antibiotic	1	0.000356252	35	0.0124688	0.0124688	.	.	x	x	0	34	1	2772	2807	0	0.971429	0.0285714	1	0.0285714
unspecified diabetes	hydroquinone sulfate	Drug - Topical Agents	50	0.0178126	2119	0.754898	0.0127604	.	.	.	.	5	2074	45	683	2807	0.00235405	0.97646	0.0211864	0.9	0.0212364
unspecified analgesic	carbamazepine glucuronide*	Drug - Neurological	12	0.00427503	3	0.00106876	0.0127749	.	.	.	.	11	2	1	2793	2807	0.785714	0.142857	0.0714286	0.0833333	0.333333
betahistine	7-hydroxywarfarin	Drug - Cardiovascular	2	0.000712504	18	0.00641254	0.0127862	.	x	.	x	1	17	1	2788	2807	0.0526316	0.894737	0.0526316	0.5	0.0555556
nitroglycerin	7-hydroxywarfarin	Drug - Cardiovascular	2	0.000712504	18	0.00641254	0.0127862	.	.	.	.	1	17	1	2788	2807	0.0526316	0.894737	0.0526316	0.5	0.0555556
verapamil	7-hydroxywarfarin	Drug - Cardiovascular	2	0.000712504	18	0.00641254	0.0127862	.	.	.	.	1	17	1	2788	2807	0.0526316	0.894737	0.0526316	0.5	0.0555556
losartan	o-hydroxyatorvastatin	Drug - Metabolic	24	0.00855005	110	0.0391877	0.0129382	.	.	.	.	20	106	4	2677	2807	0.153846	0.815385	0.0307692	0.166667	0.0363636
rabeprazole	valsartan	Drug - Cardiovascular	33	0.0117563	171	0.0609191	0.0130777	.	.	.	.	27	165	6	2609	2807	0.136364	0.833333	0.030303	0.181818	0.0350877
metformin	montelukast	Drug - Respiratory	220	0.0783755	26	0.00926256	0.0131473	.	.	.	.	214	20	6	2567	2807	0.891667	0.0833333	0.025	0.0272727	0.230769
buspirone	amoxicillin	Drug - Antibiotic	1	0.000356252	37	0.0131813	0.0131813	.	.	.	.	0	36	1	2770	2807	0	0.972973	0.027027	1	0.027027
labetalol	amoxicillin	Drug - Antibiotic	1	0.000356252	37	0.0131813	0.0131813	.	x	.	x	0	36	1	2770	2807	0	0.972973	0.027027	1	0.027027
unspecified hypertension	desmethylnaproxen sulfate	Drug - Analgesics, Anesthetics	98	0.0349127	27	0.00961881	0.0132236	.	.	.	.	94	23	4	2686	2807	0.77686	0.190083	0.0330579	0.0408163	0.148148
amlodipine	pantoprazole	Drug - Gastrointestinal	30	0.0106876	88	0.0313502	0.0132561	.	.	.	.	26	84	4	2693	2807	0.22807	0.736842	0.0350877	0.133333	0.0454545
salbutamol	fexofenadine	Drug - Respiratory	25	0.00890631	57	0.0203064	0.0133028	.	x	.	x	22	54	3	2728	2807	0.278481	0.683544	0.0379747	0.12	0.0526316
omeprazole	hydrochlorothiazide	Drug - Cardiovascular	27	0.00961881	53	0.0188814	0.013503	.	.	.	.	24	50	3	2730	2807	0.311688	0.649351	0.038961	0.111111	0.0566038
clonazepam	metoprolol	Drug - Cardiovascular	1	0.000356252	38	0.0135376	0.0135376	.	.	.	.	0	37	1	2769	2807	0	0.973684	0.0263158	1	0.0263158
haloperidol	metoprolol	Drug - Cardiovascular	1	0.000356252	38	0.0135376	0.0135376	.	.	.	.	0	37	1	2769	2807	0	0.973684	0.0263158	1	0.0263158
mycophenolate mofetil	metoprolol	Drug - Cardiovascular	1	0.000356252	38	0.0135376	0.0135376	.	.	.	.	0	37	1	2769	2807	0	0.973684	0.0263158	1	0.0263158
risperidone	metoprolol	Drug - Cardiovascular	1	0.000356252	38	0.0135376	0.0135376	.	.	.	.	0	37	1	2769	2807	0	0.973684	0.0263158	1	0.0263158
statin	metoprolol	Drug - Cardiovascular	1	0.000356252	38	0.0135376	0.0135376	.	.	.	.	0	37	1	2769	2807	0	0.973684	0.0263158	1	0.0263158
tizanidine	metoprolol	Drug - Cardiovascular	1	0.000356252	38	0.0135376	0.0135376	.	.	.	.	0	37	1	2769	2807	0	0.973684	0.0263158	1	0.0263158
losartan	metformin	Drug - Metabolic	24	0.00855005	846	0.301389	0.0136758	.	.	.	.	11	833	13	1950	2807	0.0128355	0.971995	0.0151692	0.541667	0.0153664
unspecified heart	repaglinide	Drug - Metabolic	13	0.00463128	3	0.00106876	0.0138345	.	.	.	.	12	2	1	2792	2807	0.8	0.133333	0.0666667	0.0769231	0.333333
vitamin a	atenolol	Drug - Cardiovascular	4	0.00142501	140	0.0498753	0.0138694	.	.	.	.	2	138	2	2665	2807	0.0140845	0.971831	0.0140845	0.5	0.0142857
unspecified analgesic	3-(N-acetyl-L-cystein-S-yl) acetaminophen	Drug - Analgesics, Anesthetics	12	0.00427503	370	0.131813	0.0138882	.	.	.	.	7	365	5	2430	2807	0.0185676	0.96817	0.0132626	0.416667	0.0135135
unspecified hair loss	imipramine	Drug - Psychoactive	39	0.0138938	1	0.000356252	0.0138938	.	x	.	x	38	0	1	2768	2807	0.974359	0	0.025641	0.025641	1
sitagliptin	perindopril	Drug - Cardiovascular	37	0.0131813	14	0.00498753	0.0139275	.	.	.	.	35	12	2	2758	2807	0.714286	0.244898	0.0408163	0.0540541	0.142857
valsartan	10-hydroxywarfarin	Drug - Cardiovascular	40	0.0142501	13	0.00463128	0.0139875	.	.	.	.	38	11	2	2756	2807	0.745098	0.215686	0.0392157	0.05	0.153846
valsartan	6-hydroxywarfarin	Drug - Cardiovascular	40	0.0142501	13	0.00463128	0.0139875	.	.	.	.	38	11	2	2756	2807	0.745098	0.215686	0.0392157	0.05	0.153846
pioglitazone	o-hydroxyatorvastatin	Drug - Metabolic	5	0.00178126	110	0.0391877	0.0140836	.	.	.	.	3	108	2	2694	2807	0.0265487	0.955752	0.0176991	0.4	0.0181818
unspecified nasal spray	moxifloxacin	Drug - Antibiotic	10	0.00356252	4	0.00142501	0.0141817	.	.	.	.	9	3	1	2794	2807	0.692308	0.230769	0.0769231	0.1	0.25
unspecified prostate	sildenafil	Drug - Cardiovascular	10	0.00356252	4	0.00142501	0.0141817	.	.	.	.	9	3	1	2794	2807	0.692308	0.230769	0.0769231	0.1	0.25
propranolol	ranitidine N-oxide*	Drug - Gastrointestinal	2	0.000712504	20	0.00712504	0.0142018	.	.	.	.	1	19	1	2786	2807	0.047619	0.904762	0.047619	0.5	0.05
simethicone	ranitidine N-oxide*	Drug - Gastrointestinal	2	0.000712504	20	0.00712504	0.0142018	.	.	.	.	1	19	1	2786	2807	0.047619	0.904762	0.047619	0.5	0.05
sodium chloride	O-desmethyltramadol glucuronide	Drug - Analgesics, Anesthetics	2	0.000712504	20	0.00712504	0.0142018	.	.	x	x	1	19	1	2786	2807	0.047619	0.904762	0.047619	0.5	0.05
ursodeoxycholic acid	topiramate	Drug - Neurological	2	0.000712504	20	0.00712504	0.0142018	.	x	.	x	1	19	1	2786	2807	0.047619	0.904762	0.047619	0.5	0.05
verapamil	ranitidine N-oxide*	Drug - Gastrointestinal	2	0.000712504	20	0.00712504	0.0142018	.	.	.	.	1	19	1	2786	2807	0.047619	0.904762	0.047619	0.5	0.05
simvastatin	valsartan	Drug - Cardiovascular	9	0.00320627	171	0.0609191	0.0142047	.	.	.	.	6	168	3	2630	2807	0.0338983	0.949153	0.0169492	0.333333	0.0175439
warfarin	valsartan	Drug - Cardiovascular	9	0.00320627	171	0.0609191	0.0142047	.	.	.	.	6	168	3	2630	2807	0.0338983	0.949153	0.0169492	0.333333	0.0175439
pioglitazone	sitagliptin	Drug - Metabolic	5	0.00178126	111	0.039544	0.0143316	.	.	.	.	3	109	2	2693	2807	0.0263158	0.95614	0.0175439	0.4	0.018018
vitamin b	sitagliptin	Drug - Metabolic	82	0.0292127	111	0.039544	0.0144267	.	.	.	.	74	103	8	2622	2807	0.4	0.556757	0.0432432	0.097561	0.0720721
unspecified dyslipidemia	4-hydroxy duloxetine glucuronide*	Drug - Psychoactive	143	0.0509441	4	0.00142501	0.0144511	.	.	.	.	141	2	2	2662	2807	0.972414	0.0137931	0.0137931	0.013986	0.5
unspecified dyslipidemia	5-hydroxy-6-methoxy duloxetine sulfate*	Drug - Psychoactive	143	0.0509441	4	0.00142501	0.0144511	.	.	.	.	141	2	2	2662	2807	0.972414	0.0137931	0.0137931	0.013986	0.5
rabeprazole	carbamazepine	Drug - Neurological	33	0.0117563	16	0.00570004	0.0145127	.	.	.	.	31	14	2	2760	2807	0.659574	0.297872	0.0425532	0.0606061	0.125
rabeprazole	pregabalin	Drug - Neurological	33	0.0117563	16	0.00570004	0.0145127	.	.	.	.	31	14	2	2760	2807	0.659574	0.297872	0.0425532	0.0606061	0.125
omeprazole	2-hydroxyacetaminophen sulfate*	Drug - Analgesics, Anesthetics	27	0.00961881	575	0.204845	0.0147171	.	.	.	.	16	564	11	2216	2807	0.0270728	0.954315	0.0186125	0.407407	0.0191304
unspecified analgesic	4-acetamidophenol	Drug - Analgesics, Anesthetics	12	0.00427503	708	0.252227	0.0147904	.	.	.	.	5	701	7	2094	2807	0.00701262	0.98317	0.00981767	0.583333	0.00988701
zinc	ofloxacin	Drug - Antibiotic	7	0.00249377	6	0.00213751	0.0148828	.	x	.	x	6	5	1	2795	2807	0.5	0.416667	0.0833333	0.142857	0.166667
betamethasone	desmethylnaproxen	Drug - Analgesics, Anesthetics	3	0.00106876	14	0.00498753	0.0148934	.	.	.	.	2	13	1	2791	2807	0.125	0.8125	0.0625	0.333333	0.0714286
clobetasol propionate	desmethylnaproxen	Drug - Analgesics, Anesthetics	3	0.00106876	14	0.00498753	0.0148934	.	.	.	.	2	13	1	2791	2807	0.125	0.8125	0.0625	0.333333	0.0714286
metoprolol	clarithromycin	Drug - Antibiotic	3	0.00106876	14	0.00498753	0.0148934	.	.	.	.	2	13	1	2791	2807	0.125	0.8125	0.0625	0.333333	0.0714286
quetiapine	fluoxetine	Drug - Psychoactive	3	0.00106876	14	0.00498753	0.0148934	.	.	.	.	2	13	1	2791	2807	0.125	0.8125	0.0625	0.333333	0.0714286
Tetryzoline	clarithromycin	Drug - Antibiotic	3	0.00106876	14	0.00498753	0.0148934	.	x	.	x	2	13	1	2791	2807	0.125	0.8125	0.0625	0.333333	0.0714286
ursodeoxycholic acid	desmethylcitalopram*	Drug - Psychoactive	2	0.000712504	21	0.0074813	0.0149093	.	.	.	.	1	20	1	2785	2807	0.0454545	0.909091	0.0454545	0.5	0.047619
irbesartan	atenolol	Drug - Cardiovascular	11	0.00391877	140	0.0498753	0.0149143	.	x	.	x	8	137	3	2659	2807	0.0540541	0.925676	0.0202703	0.272727	0.0214286
buspirone	ranitidine	Drug - Gastrointestinal	1	0.000356252	42	0.0149626	0.0149626	.	.	.	.	0	41	1	2765	2807	0	0.97619	0.0238095	1	0.0238095
scopolamine	ranitidine	Drug - Gastrointestinal	1	0.000356252	42	0.0149626	0.0149626	.	.	.	.	0	41	1	2765	2807	0	0.97619	0.0238095	1	0.0238095
unspecified kidney	ranitidine	Drug - Gastrointestinal	1	0.000356252	42	0.0149626	0.0149626	.	.	.	.	0	41	1	2765	2807	0	0.97619	0.0238095	1	0.0238095
esomeprazole	4-hydroxycoumarin	Drug - Cardiovascular	26	0.00926256	1741	0.620235	0.0151411	.	.	.	.	16	1731	10	1050	2807	0.00910643	0.985202	0.00569152	0.384615	0.00574383
hydrochlorothiazide	ketopioglitazone	Drug - Metabolic	8	0.00285002	69	0.0245814	0.0151546	.	.	.	.	6	67	2	2732	2807	0.08	0.893333	0.0266667	0.25	0.0289855
atenolol	pioglitazone	Drug - Metabolic	18	0.00641254	30	0.0106876	0.0151945	.	.	.	.	16	28	2	2761	2807	0.347826	0.608696	0.0434783	0.111111	0.0666667
calcium	pregabalin	Drug - Neurological	95	0.033844	16	0.00570004	0.0152694	.	.	.	.	92	13	3	2699	2807	0.851852	0.12037	0.0277778	0.0315789	0.1875
acetylsalicylic acid	omeprazole	Drug - Gastrointestinal	111	0.039544	67	0.0238689	0.015315	.	.	.	.	104	60	7	2636	2807	0.608187	0.350877	0.0409357	0.0630631	0.104478
acetylcysteine	furosemide	Drug - Cardiovascular	1	0.000356252	43	0.0153188	0.0153189	.	x	.	x	0	42	1	2764	2807	0	0.976744	0.0232558	1	0.0232558
balsalazide	furosemide	Drug - Cardiovascular	1	0.000356252	43	0.0153188	0.0153189	.	x	.	x	0	42	1	2764	2807	0	0.976744	0.0232558	1	0.0232558
carvedilol	furosemide	Drug - Cardiovascular	1	0.000356252	43	0.0153188	0.0153189	.	x	.	x	0	42	1	2764	2807	0	0.976744	0.0232558	1	0.0232558
cyanocobalamin	furosemide	Drug - Cardiovascular	1	0.000356252	43	0.0153188	0.0153189	.	.	.	.	0	42	1	2764	2807	0	0.976744	0.0232558	1	0.0232558
manidipine	furosemide	Drug - Cardiovascular	1	0.000356252	43	0.0153188	0.0153189	.	x	.	x	0	42	1	2764	2807	0	0.976744	0.0232558	1	0.0232558
sodium bicarbonate	furosemide	Drug - Cardiovascular	1	0.000356252	43	0.0153188	0.0153189	.	x	.	x	0	42	1	2764	2807	0	0.976744	0.0232558	1	0.0232558
sulodexide	furosemide	Drug - Cardiovascular	1	0.000356252	43	0.0153188	0.0153189	.	x	.	x	0	42	1	2764	2807	0	0.976744	0.0232558	1	0.0232558
ranitidine	o-hydroxyatorvastatin	Drug - Metabolic	14	0.00498753	110	0.0391877	0.0155446	.	.	.	.	11	107	3	2686	2807	0.0909091	0.884298	0.0247934	0.214286	0.0272727
calcium	mycophenolic acid glucuronide	Drug - Antiinflammatory, Immunosuppressant	95	0.033844	6	0.00213751	0.0155574	.	.	.	.	93	4	2	2708	2807	0.939394	0.040404	0.020202	0.0210526	0.333333
unspecified analgesic	4-acetaminophen sulfate	Drug - Analgesics, Anesthetics	12	0.00427503	1102	0.39259	0.0156228	.	.	.	.	3	1093	9	1702	2807	0.00271493	0.98914	0.0081448	0.75	0.00816697
montelukast	pseudoephedrine	Drug - Respiratory	5	0.00178126	117	0.0416815	0.0158609	.	.	.	.	3	115	2	2687	2807	0.025	0.958333	0.0166667	0.4	0.017094
ginseng	ezetimibe glucuronide*	Drug - Metabolic	5	0.00178126	9	0.00320627	0.0159402	.	.	.	.	4	8	1	2794	2807	0.307692	0.615385	0.0769231	0.2	0.111111
pioglitazone	ezetimibe glucuronide*	Drug - Metabolic	5	0.00178126	9	0.00320627	0.0159402	.	.	.	.	4	8	1	2794	2807	0.307692	0.615385	0.0769231	0.2	0.111111
lisinopril	repaglinide	Drug - Metabolic	15	0.00534378	3	0.00106876	0.0159515	.	.	.	.	14	2	1	2790	2807	0.823529	0.117647	0.0588235	0.0666667	0.333333
vitamin d	omeprazole	Drug - Gastrointestinal	510	0.181689	67	0.0238689	0.0160191	.	.	.	.	490	47	20	2250	2807	0.879713	0.0843806	0.0359066	0.0392157	0.298507
acetylcysteine	atorvastatin (lipitor)	Drug - Metabolic	1	0.000356252	45	0.0160314	0.0160313	.	.	.	.	0	44	1	2762	2807	0	0.977778	0.0222222	1	0.0222222
carvedilol	atorvastatin (lipitor)	Drug - Metabolic	1	0.000356252	45	0.0160314	0.0160313	.	.	.	.	0	44	1	2762	2807	0	0.977778	0.0222222	1	0.0222222
gabapentin	atorvastatin (lipitor)	Drug - Metabolic	1	0.000356252	45	0.0160314	0.0160313	.	.	.	.	0	44	1	2762	2807	0	0.977778	0.0222222	1	0.0222222
lercanidipine	atorvastatin (lipitor)	Drug - Metabolic	1	0.000356252	45	0.0160314	0.0160313	.	x	.	x	0	44	1	2762	2807	0	0.977778	0.0222222	1	0.0222222
manidipine	atorvastatin (lipitor)	Drug - Metabolic	1	0.000356252	45	0.0160314	0.0160313	.	.	.	.	0	44	1	2762	2807	0	0.977778	0.0222222	1	0.0222222
ramipril	atorvastatin (lipitor)	Drug - Metabolic	1	0.000356252	45	0.0160314	0.0160313	.	.	.	.	0	44	1	2762	2807	0	0.977778	0.0222222	1	0.0222222
sodium bicarbonate	atorvastatin (lipitor)	Drug - Metabolic	1	0.000356252	45	0.0160314	0.0160313	.	.	.	.	0	44	1	2762	2807	0	0.977778	0.0222222	1	0.0222222
statin	alpha-hydroxymetoprolol	Drug - Cardiovascular	1	0.000356252	45	0.0160314	0.0160313	.	.	.	.	0	44	1	2762	2807	0	0.977778	0.0222222	1	0.0222222
sulodexide	atorvastatin (lipitor)	Drug - Metabolic	1	0.000356252	45	0.0160314	0.0160313	.	.	.	.	0	44	1	2762	2807	0	0.977778	0.0222222	1	0.0222222
unspecified immunosuppressant	atorvastatin (lipitor)	Drug - Metabolic	1	0.000356252	45	0.0160314	0.0160313	.	.	.	.	0	44	1	2762	2807	0	0.977778	0.0222222	1	0.0222222
atorvastatin	citalopram/escitalopram	Drug - Psychoactive	90	0.0320627	31	0.0110438	0.0160374	.	.	.	.	86	27	4	2690	2807	0.735043	0.230769	0.034188	0.0444444	0.129032
ginseng	4-acetamidophenol	Drug - Analgesics, Anesthetics	5	0.00178126	708	0.252227	0.016068	.	.	.	.	1	704	4	2098	2807	0.00141044	0.992948	0.00564175	0.8	0.00564972
insulin aspart	omeprazole	Drug - Gastrointestinal	63	0.0224439	67	0.0238689	0.0160812	.	.	.	.	58	62	5	2682	2807	0.464	0.496	0.04	0.0793651	0.0746269
atorvastatin	2-hydroxyacetaminophen sulfate*	Drug - Analgesics, Anesthetics	90	0.0320627	575	0.204845	0.0161419	.	.	.	.	62	547	28	2170	2807	0.0973312	0.858713	0.043956	0.311111	0.0486957
celecoxib	citalopram/escitalopram	Drug - Psychoactive	18	0.00641254	31	0.0110438	0.016181	.	.	.	.	16	29	2	2760	2807	0.340426	0.617021	0.0425532	0.111111	0.0645161
exenatide	hydroxypioglitazone (M-IV)	Drug - Metabolic	2	0.000712504	23	0.0081938	0.0163234	.	.	.	.	1	22	1	2783	2807	0.0416667	0.916667	0.0416667	0.5	0.0434783
unspecified nasal spray	fexofenadine	Drug - Respiratory	10	0.00356252	57	0.0203064	0.0164231	.	.	.	.	8	55	2	2742	2807	0.123077	0.846154	0.0307692	0.2	0.0350877
omeprazole	fexofenadine	Drug - Respiratory	27	0.00961881	57	0.0203064	0.0164406	.	.	.	.	24	54	3	2726	2807	0.296296	0.666667	0.037037	0.111111	0.0526316
folic acid	metoprolol acid metabolite*	Drug - Cardiovascular	33	0.0117563	180	0.0641254	0.0165635	.	.	.	.	27	174	6	2600	2807	0.130435	0.84058	0.0289855	0.181818	0.0333333
unspecified hypertension	pregabalin	Drug - Neurological	98	0.0349127	16	0.00570004	0.0166037	.	.	.	.	95	13	3	2696	2807	0.855856	0.117117	0.027027	0.0306122	0.1875
Omega-3 fatty acids	tadalafil	Drug - Cardiovascular	114	0.0406128	82	0.0292127	0.0167533	.	.	.	.	106	74	8	2619	2807	0.56383	0.393617	0.0425532	0.0701754	0.097561
clopidogrel	valsartan	Drug - Cardiovascular	17	0.00605629	171	0.0609191	0.0169297	.	.	.	.	13	167	4	2623	2807	0.0706522	0.907609	0.0217391	0.235294	0.0233918
unspecified analgesic	4-hydroxy duloxetine glucuronide*	Drug - Psychoactive	12	0.00427503	4	0.00142501	0.0169998	.	.	.	.	11	3	1	2792	2807	0.733333	0.2	0.0666667	0.0833333	0.25
unspecified analgesic	5-hydroxy-6-methoxy duloxetine sulfate*	Drug - Psychoactive	12	0.00427503	4	0.00142501	0.0169998	.	.	.	.	11	3	1	2792	2807	0.733333	0.2	0.0666667	0.0833333	0.25
amitriptyline	pregabalin	Drug - Neurological	3	0.00106876	16	0.00570004	0.0170088	.	.	.	.	2	15	1	2789	2807	0.111111	0.833333	0.0555556	0.333333	0.0625
isosorbide dinitrate	pregabalin	Drug - Neurological	3	0.00106876	16	0.00570004	0.0170088	.	.	.	.	2	15	1	2789	2807	0.111111	0.833333	0.0555556	0.333333	0.0625
quetiapine	norfluoxetine	Drug - Psychoactive	3	0.00106876	16	0.00570004	0.0170088	.	.	.	.	2	15	1	2789	2807	0.111111	0.833333	0.0555556	0.333333	0.0625
unspecified colon	carbamazepine	Drug - Neurological	3	0.00106876	16	0.00570004	0.0170088	.	.	.	.	2	15	1	2789	2807	0.111111	0.833333	0.0555556	0.333333	0.0625
betahistine	tramadol	Drug - Analgesics, Anesthetics	2	0.000712504	24	0.00855005	0.01703	.	.	.	.	1	23	1	2782	2807	0.04	0.92	0.04	0.5	0.0416667
sodium chloride	tramadol	Drug - Analgesics, Anesthetics	2	0.000712504	24	0.00855005	0.01703	.	.	.	.	1	23	1	2782	2807	0.04	0.92	0.04	0.5	0.0416667
omeprazole	celecoxib	Drug - Analgesics, Anesthetics	27	0.00961881	58	0.0206626	0.0172271	.	.	.	.	24	55	3	2725	2807	0.292683	0.670732	0.0365854	0.111111	0.0517241
vitamin e	4-acetamidophenylglucuronide	Drug - Analgesics, Anesthetics	17	0.00605629	938	0.334165	0.017322	.	.	.	.	16	937	1	1853	2807	0.0167715	0.98218	0.00104822	0.0588235	0.0010661
diosmin	3-(N-acetyl-L-cystein-S-yl) acetaminophen	Drug - Analgesics, Anesthetics	2	0.000712504	370	0.131813	0.017334	.	.	.	.	0	368	2	2437	2807	0	0.994595	0.00540541	1	0.00540541
metformin	repaglinide	Drug - Metabolic	220	0.0783755	3	0.00106876	0.0174001	.	.	.	.	218	1	2	2586	2807	0.986425	0.00452489	0.00904977	0.00909091	0.666667
exenatide	Glimepiride	Drug - Metabolic	2	0.000712504	25	0.00890631	0.0177364	.	.	.	.	1	24	1	2781	2807	0.0384615	0.923077	0.0384615	0.5	0.04
sitagliptin	pregabalin	Drug - Neurological	37	0.0131813	16	0.00570004	0.0180647	.	.	.	.	35	14	2	2756	2807	0.686275	0.27451	0.0392157	0.0540541	0.125
clopidogrel	repaglinide	Drug - Metabolic	17	0.00605629	3	0.00106876	0.0180655	.	.	.	.	16	2	1	2788	2807	0.842105	0.105263	0.0526316	0.0588235	0.333333
unspecified dyslipidemia	ranitidine	Drug - Gastrointestinal	143	0.0509441	42	0.0149626	0.0180889	.	.	.	.	137	36	6	2628	2807	0.765363	0.201117	0.0335196	0.041958	0.142857
beclomethasone dipropionate	metronidazole	Drug - Antibiotic	1	0.000356252	51	0.0181689	0.0181689	x	x	x	x	0	50	1	2756	2807	0	0.980392	0.0196078	1	0.0196078
unspecified kidney	metronidazole	Drug - Antibiotic	1	0.000356252	51	0.0181689	0.0181689	.	.	.	.	0	50	1	2756	2807	0	0.980392	0.0196078	1	0.0196078
rosuvastatin	omeprazole	Drug - Gastrointestinal	65	0.0231564	67	0.0238689	0.0182199	.	.	.	.	60	62	5	2680	2807	0.472441	0.488189	0.0393701	0.0769231	0.0746269
gestodene	2-hydroxyacetaminophen sulfate*	Drug - Analgesics, Anesthetics	6	0.00213751	575	0.204845	0.0183792	.	x	.	x	2	571	4	2230	2807	0.0034662	0.989601	0.00693241	0.666667	0.00695652
losartan	omeprazole	Drug - Gastrointestinal	24	0.00855005	67	0.0238689	0.0183848	.	.	.	.	21	64	3	2719	2807	0.238636	0.727273	0.0340909	0.125	0.0447761
domperidone	10-hydroxywarfarin	Drug - Cardiovascular	4	0.00142501	13	0.00463128	0.0184066	.	x	.	x	3	12	1	2791	2807	0.1875	0.75	0.0625	0.25	0.0769231
domperidone	6-hydroxywarfarin	Drug - Cardiovascular	4	0.00142501	13	0.00463128	0.0184066	.	.	.	.	3	12	1	2791	2807	0.1875	0.75	0.0625	0.25	0.0769231
unspecified heart	midazolam	Drug - Psychoactive	13	0.00463128	4	0.00142501	0.0184066	.	.	.	.	12	3	1	2791	2807	0.75	0.1875	0.0625	0.0769231	0.25
budesonide	montelukast	Drug - Respiratory	2	0.000712504	26	0.00926256	0.0184426	.	.	.	.	1	25	1	2780	2807	0.037037	0.925926	0.037037	0.5	0.0384615
diosmin	montelukast	Drug - Respiratory	2	0.000712504	26	0.00926256	0.0184426	.	.	.	.	1	25	1	2780	2807	0.037037	0.925926	0.037037	0.5	0.0384615
fluticasone	montelukast	Drug - Respiratory	2	0.000712504	26	0.00926256	0.0184426	.	.	.	.	1	25	1	2780	2807	0.037037	0.925926	0.037037	0.5	0.0384615
propranolol	montelukast	Drug - Respiratory	2	0.000712504	26	0.00926256	0.0184426	.	.	.	.	1	25	1	2780	2807	0.037037	0.925926	0.037037	0.5	0.0384615
unspecified supplement	carboxyibuprofen	Drug - Analgesics, Anesthetics	16	0.00570004	102	0.0363377	0.0184835	.	.	.	.	13	99	3	2692	2807	0.113043	0.86087	0.026087	0.1875	0.0294118
vitamin a	meloxicam	Drug - Analgesics, Anesthetics	4	0.00142501	163	0.0580691	0.0186087	.	.	.	.	2	161	2	2642	2807	0.0121212	0.975758	0.0121212	0.5	0.0122699
losartan	Glimepiride	Drug - Metabolic	24	0.00855005	25	0.00890631	0.0186464	.	.	.	.	22	23	2	2760	2807	0.468085	0.489362	0.0425532	0.0833333	0.08
multivitamin	4-hydroxycoumarin	Drug - Cardiovascular	276	0.0983256	1741	0.620235	0.0187327	.	.	.	.	123	1588	153	943	2807	0.0659871	0.851931	0.0820815	0.554348	0.0878805
haloperidol	hydrochlorothiazide	Drug - Cardiovascular	1	0.000356252	53	0.0188814	0.0188814	.	.	.	.	0	52	1	2754	2807	0	0.981132	0.0188679	1	0.0188679
leflunomide	hydrochlorothiazide	Drug - Cardiovascular	1	0.000356252	53	0.0188814	0.0188814	.	x	.	x	0	52	1	2754	2807	0	0.981132	0.0188679	1	0.0188679
lercanidipine	hydrochlorothiazide	Drug - Cardiovascular	1	0.000356252	53	0.0188814	0.0188814	.	.	.	.	0	52	1	2754	2807	0	0.981132	0.0188679	1	0.0188679
propafenone	hydrochlorothiazide	Drug - Cardiovascular	1	0.000356252	53	0.0188814	0.0188814	.	.	.	.	0	52	1	2754	2807	0	0.981132	0.0188679	1	0.0188679
rebamipide	hydrochlorothiazide	Drug - Cardiovascular	1	0.000356252	53	0.0188814	0.0188814	.	.	.	.	0	52	1	2754	2807	0	0.981132	0.0188679	1	0.0188679
risperidone	hydrochlorothiazide	Drug - Cardiovascular	1	0.000356252	53	0.0188814	0.0188814	.	.	.	.	0	52	1	2754	2807	0	0.981132	0.0188679	1	0.0188679
tizanidine	hydrochlorothiazide	Drug - Cardiovascular	1	0.000356252	53	0.0188814	0.0188814	.	.	.	.	0	52	1	2754	2807	0	0.981132	0.0188679	1	0.0188679
unspecified hypertension	alpha-hydroxymetoprolol	Drug - Cardiovascular	98	0.0349127	45	0.0160314	0.0189159	.	.	.	.	93	40	5	2669	2807	0.673913	0.289855	0.0362319	0.0510204	0.111111
unspecified dyslipidemia	omeprazole	Drug - Gastrointestinal	143	0.0509441	67	0.0238689	0.0189489	.	.	.	.	135	59	8	2605	2807	0.668317	0.292079	0.039604	0.0559441	0.119403
sitagliptin	diclofenac	Drug - Analgesics, Anesthetics	37	0.0131813	79	0.0281439	0.0189712	.	.	.	.	33	75	4	2695	2807	0.294643	0.669643	0.0357143	0.108108	0.0506329
gliclazide	enalapril	Drug - Cardiovascular	47	0.0167439	13	0.00463128	0.0190342	.	.	.	.	45	11	2	2749	2807	0.775862	0.189655	0.0344828	0.0425532	0.153846
unspecified antiasthmatic	verapamil	Drug - Cardiovascular	9	0.00320627	6	0.00213751	0.019101	.	.	.	.	8	5	1	2793	2807	0.571429	0.357143	0.0714286	0.111111	0.166667
protein supplement	tadalafil	Drug - Cardiovascular	20	0.00712504	82	0.0292127	0.0191373	.	x	.	x	17	79	3	2708	2807	0.171717	0.79798	0.030303	0.15	0.0365854
fluvastatin	losartan	Drug - Cardiovascular	2	0.000712504	27	0.00961881	0.0191485	.	.	.	.	1	26	1	2779	2807	0.0357143	0.928571	0.0357143	0.5	0.037037
mometasone furoate	desmethylnaproxen sulfate	Drug - Analgesics, Anesthetics	2	0.000712504	27	0.00961881	0.0191485	.	.	.	.	1	26	1	2779	2807	0.0357143	0.928571	0.0357143	0.5	0.037037
unspecified antiinflammatory	desmethylnaproxen sulfate	Drug - Analgesics, Anesthetics	2	0.000712504	27	0.00961881	0.0191485	.	x	.	x	1	26	1	2779	2807	0.0357143	0.928571	0.0357143	0.5	0.037037
omeprazole	olmesartan	Drug - Cardiovascular	27	0.00961881	2	0.000712504	0.0191485	.	.	.	.	26	1	1	2779	2807	0.928571	0.0357143	0.0357143	0.037037	0.5
omeprazole	3-(N-acetyl-L-cystein-S-yl) acetaminophen	Drug - Analgesics, Anesthetics	27	0.00961881	370	0.131813	0.0192444	.	.	.	.	19	362	8	2418	2807	0.0488432	0.930591	0.0205656	0.296296	0.0216216
vitamin e	3-(methylthio)acetaminophen sulfate*	Drug - Analgesics, Anesthetics	17	0.00605629	621	0.221233	0.0192469	.	.	.	.	17	621	0	2169	2807	0.0266458	0.973354	0	0	0
celecoxib	citalopram propionate*	Drug - Psychoactive	18	0.00641254	34	0.0121126	0.0193012	.	.	.	.	16	32	2	2757	2807	0.32	0.64	0.04	0.111111	0.0588235
indapamide	sitagliptin	Drug - Metabolic	15	0.00534378	111	0.039544	0.0193473	.	.	.	.	12	108	3	2684	2807	0.097561	0.878049	0.0243902	0.2	0.027027
salbutamol	1-hydroxy-2-naphthalenecarboxylate	Drug - Other	25	0.00890631	403	0.14357	0.019473	.	.	.	.	17	395	8	2387	2807	0.0404762	0.940476	0.0190476	0.32	0.0198511
not annotated	o-hydroxyatorvastatin	Drug - Metabolic	27	0.00961881	110	0.0391877	0.0195301	.	.	.	.	23	106	4	2674	2807	0.172932	0.796992	0.0300752	0.148148	0.0363636
omeprazole	o-hydroxyatorvastatin	Drug - Metabolic	27	0.00961881	110	0.0391877	0.0195301	.	.	.	.	23	106	4	2674	2807	0.172932	0.796992	0.0300752	0.148148	0.0363636
enalapril	diclofenac	Drug - Analgesics, Anesthetics	8	0.00285002	79	0.0281439	0.0196188	.	.	.	.	6	77	2	2722	2807	0.0705882	0.905882	0.0235294	0.25	0.0253165
hydrochlorothiazide	4-acetamidophenylglucuronide	Drug - Analgesics, Anesthetics	8	0.00285002	938	0.334165	0.0197713	.	.	.	.	2	932	6	1867	2807	0.00212766	0.991489	0.00638298	0.75	0.00639659
unspecified rheumatoid arthritis	clarithromycin	Drug - Antibiotic	4	0.00142501	14	0.00498753	0.0198119	.	.	.	.	3	13	1	2790	2807	0.176471	0.764706	0.0588235	0.25	0.0714286
unspecified rheumatoid arthritis	desmethylnaproxen	Drug - Analgesics, Anesthetics	4	0.00142501	14	0.00498753	0.0198119	.	.	.	.	3	13	1	2790	2807	0.176471	0.764706	0.0588235	0.25	0.0714286
ursodeoxycholic acid	dexlansoprazole	Drug - Gastrointestinal	2	0.000712504	28	0.00997506	0.0198541	.	.	.	.	1	27	1	2778	2807	0.0344828	0.931034	0.0344828	0.5	0.0357143
omeprazole	hydroxypioglitazone (M-IV)	Drug - Metabolic	27	0.00961881	23	0.0081938	0.0199087	.	.	.	.	25	21	2	2759	2807	0.520833	0.4375	0.0416667	0.0740741	0.0869565
lisinopril	metformin	Drug - Metabolic	15	0.00534378	846	0.301389	0.0200262	.	.	.	.	6	837	9	1955	2807	0.00704225	0.982394	0.0105634	0.6	0.0106383
not annotated	sitagliptin	Drug - Metabolic	27	0.00961881	111	0.039544	0.0201274	.	.	.	.	23	107	4	2673	2807	0.171642	0.798507	0.0298507	0.148148	0.036036
ranitidine	alpha-hydroxymetoprolol	Drug - Cardiovascular	14	0.00498753	45	0.0160314	0.0202371	.	.	.	.	12	43	2	2750	2807	0.210526	0.754386	0.0350877	0.142857	0.0444444
beta carotene	diphenhydramine	Drug - Respiratory	1	0.000356252	57	0.0203064	0.0203064	.	x	.	x	0	56	1	2750	2807	0	0.982456	0.0175439	1	0.0175439
fingolimod	diphenhydramine	Drug - Respiratory	1	0.000356252	57	0.0203064	0.0203064	.	x	.	x	0	56	1	2750	2807	0	0.982456	0.0175439	1	0.0175439
formoterol	diphenhydramine	Drug - Respiratory	1	0.000356252	57	0.0203064	0.0203064	.	.	.	.	0	56	1	2750	2807	0	0.982456	0.0175439	1	0.0175439
haloperidol	diphenhydramine	Drug - Respiratory	1	0.000356252	57	0.0203064	0.0203064	.	.	.	.	0	56	1	2750	2807	0	0.982456	0.0175439	1	0.0175439
risperidone	diphenhydramine	Drug - Respiratory	1	0.000356252	57	0.0203064	0.0203064	.	.	.	.	0	56	1	2750	2807	0	0.982456	0.0175439	1	0.0175439
sertraline	fexofenadine	Drug - Respiratory	1	0.000356252	57	0.0203064	0.0203064	.	.	.	.	0	56	1	2750	2807	0	0.982456	0.0175439	1	0.0175439
tizanidine	diphenhydramine	Drug - Respiratory	1	0.000356252	57	0.0203064	0.0203064	.	.	.	.	0	56	1	2750	2807	0	0.982456	0.0175439	1	0.0175439
tramadol	diphenhydramine	Drug - Respiratory	1	0.000356252	57	0.0203064	0.0203064	.	.	.	.	0	56	1	2750	2807	0	0.982456	0.0175439	1	0.0175439
unspecified allergic rhinitis	fexofenadine	Drug - Respiratory	1	0.000356252	57	0.0203064	0.0203064	.	.	.	.	0	56	1	2750	2807	0	0.982456	0.0175439	1	0.0175439
pantoprazole	hydrochlorothiazide	Drug - Cardiovascular	12	0.00427503	53	0.0188814	0.0204568	.	.	.	.	10	51	2	2744	2807	0.15873	0.809524	0.031746	0.166667	0.0377358
unspecified analgesic	hydrochlorothiazide	Drug - Cardiovascular	12	0.00427503	53	0.0188814	0.0204568	.	.	.	.	10	51	2	2744	2807	0.15873	0.809524	0.031746	0.166667	0.0377358
creatine	1-hydroxy-2-naphthalenecarboxylate	Drug - Other	2	0.000712504	403	0.14357	0.0205684	.	x	.	x	0	401	2	2404	2807	0	0.995037	0.00496278	1	0.00496278
verapamil	1-hydroxy-2-naphthalenecarboxylate	Drug - Other	2	0.000712504	403	0.14357	0.0205684	.	.	.	.	0	401	2	2404	2807	0	0.995037	0.00496278	1	0.00496278
vitamin d	4-hydroxy duloxetine glucuronide*	Drug - Psychoactive	510	0.181689	4	0.00142501	0.0206376	.	.	.	.	507	1	3	2296	2807	0.992172	0.00195695	0.00587084	0.00588235	0.75
vitamin d	5-hydroxy-6-methoxy duloxetine sulfate*	Drug - Psychoactive	510	0.181689	4	0.00142501	0.0206376	.	.	.	.	507	1	3	2296	2807	0.992172	0.00195695	0.00587084	0.00588235	0.75
atropine	celecoxib	Drug - Analgesics, Anesthetics	1	0.000356252	58	0.0206626	0.0206626	.	x	.	x	0	57	1	2749	2807	0	0.982759	0.0172414	1	0.0172414
[truncated: 473 more rows]

## Sheet: Table S5
Table S5: Overlap between self-reported and blood-detected drug metabolites (including unknowns with >50% missing values).
[truncated: 1,528 more rows]
